# Supplementary material for: Enhancing the e-learning system based on a novel tasks’ classification load-balancing algorithm
Source: PeerJ journal article supplement (doi:10.7717/peerj-cs.669), 2021-09-09
Supplement: Java_HTTP_Request_Program_Code.pdf [file Java_HTTP_Request_Program_Code.pdf]

# Java HTTP Request using the built-in Java class *URLConnection*.

**Http URL Connection** class from **java.net** package is used to send Java HTTP Request programmatically by send **GET** and **POST** requests and then print the response.

The *URLConnection* class allows us to **perform basic HTTP** requests without the use of any additional libraries. All the classes that we need are part of the *java.net* package.

## 1- Creating a HTTP Request

We create an *URLConnection* instance using the `openConnection ()` method of the *URLConnection* class. This method only creates a connection object but doesn't establish the connection yet.

The *URLConnection* class is used for all types of requests by setting the *request Method* attribute to one of the values: GET

```
1- URL url = new URL ("http:// https://www.blazemeter.com/");  
2- HttpURLConnection con = (HttpURLConnection) url.openConnection ();  
3- con.setRequestMethod ("GET");
```

**Create a connection to a given URL using GET method**

## 2- Sending the HTTP **Get** Request

```
1- HttpURLConnectionProgram.java
2- package com.mkyong.http;
3- import javax.net.ssl.HttpURLConnection;
4- import java.io.BufferedReader;
5- import java.io.DataOutputStream;
6- import java.io.InputStreamReader;
7- import java.net.HttpURLConnection;
8- import java.net.URL;

9- public class HttpURLConnectionExample {

10- public static void main(String[] args) throws Exception {

11- HttpURLConnectionExample obj = new HttpURLConnectionProgram();

12- System.out.println ("Testing 1 - Send Http GET request");
13- obj.sendGet ();

14- System.out.println ("Testing 2 - Send Http POST request");
15- obj.sendPost ();

16- }

17- private void sendGet () throws Exception {

18- String url = "https://www.blazemeter.com/";

19- HttpURLConnection httpClient =
20- (HttpURLConnection) new URL(url).openConnection();
    }
}
1
```

**Send the HTTP Get Requests to the blazemeter URL**

### 3- Sending the HTTP **Post** Request

```
1- httpClient.setDoOutput (true);
2- try (DataOutputStream wr = new
3- DataOutputStream (httpClient.getOutputStream())) {
4- wr.writeBytes (urlParameters);
5- wr.flush ();
6- }
7- int resCode = httpClient.getResponseCode ();
8- System.out.println("\n URL Request " + url);
9- System.out.println("Post " + urlParameters);
10- System.out.println("Response " + resCode);
11- try (BufferedReader in = new BufferedReader(
12- new InputStreamReader (httpClient.getInputStream())) {
13- String rline;
14 - StringBuilder response = new StringBuilder();
15- while ((rline = in.readLine()) != null) {
16- response.append (rline);
17- }
18- //print result
19- System.out.println (response.toString ());
20- }
21- }
```

**Send the HTTP Post Requests to the blazemeter URL**

## **HTTP GET**

The method “HTTP GET” requires the determined resource’ description.  
The result of this method is retrieved data

## **HTTP POST**

The HTTP POST method sends data to the server. It is often used when uploading a file or when submitting a completed web form.
