# Supplementary material for: Enhancing the e-learning system based on a novel tasks’ classification load-balancing algorithm
Source: PeerJ journal article supplement (doi:10.7717/peerj-cs.669), 2021-09-09
Supplement: questionnaireQuestions.pdf [file questionnaireQuestions.pdf]

| <b>System Timeliness</b>                                                     |
|------------------------------------------------------------------------------|
| <b>State If the Following Actions Respond in an Acceptable Time</b>          |
| Login to the system                                                          |
| Loading the new page                                                         |
| Transferring to the next page                                                |
| Transferring to the previous page                                            |
| Buttons' response                                                            |
| Loading the summary page                                                     |
|                                                                              |
| <b>System's Availability</b>                                                 |
| The server is available                                                      |
| The system is available in web browser                                       |
| The system can be accessed using computer                                    |
| The system can be accessed using mobile                                      |
| The system can be accessed anytime during the day                            |
| The system can be accessed during peak durations (exam duration)             |
|                                                                              |
| <b>Flexibility of Data</b>                                                   |
| Data could be viewed in different format                                     |
| Data could be viewed in different views                                      |
| Data could be viewed accumulative or individual                              |
| Slicing and dicing is available for headers                                  |
| Using the browser facilities is available                                    |
|                                                                              |
| <b>User Confidence in the System</b>                                         |
| You trust that you can easily return to any page                             |
| You trust that the system will not fail                                      |
| You trust that the system provides the required data                         |
|                                                                              |
| <b>System's Ease of Access</b>                                               |
| System registration is easy                                                  |
| System user data recoverability is easy                                      |
| System can be accessed using different methods                               |
|                                                                              |
| <b>System's Ease of Use</b>                                                  |
| Pages have a friendly interface                                              |
| Pages have more than one method to access the required data                  |
| Pages' contents can be easily understood                                     |
|                                                                              |
| <b>System's Reliability</b>                                                  |
| The system does not fail during peaks                                        |
| The system performance is the same during peaks                              |
| The system pages are continuously available during peaks                     |
| The system can serve high number of users simultaneously                     |
| The system is secured against intruders                                      |
|                                                                              |
| <b>Speed</b>                                                                 |
| The web main page loads in an acceptable time                                |
| The migration from a part to another part is performed in an acceptable time |
| Loading data time is acceptable                                              |
| Saving data time is acceptable                                               |
| Generating reports time is acceptable                                        |
