# Supplementary material for: Enhancing the e-learning system based on a novel tasks’ classification load-balancing algorithm
Source: PeerJ Comput Sci. 2021 Sep 9;7:e669. doi: 10.7717/peerj-cs.669 (PMC8444070; doi:10.7717/peerj-cs.669)
Supplement: Supplemental Information 3 [file peerj-cs-07-669-s003.xlsx]

## Sheet: AllData
Task_ID	Task Type	Task Size	Task Size2	Response time(ms)	Avaliability(%)	Throughput(Hits/second)	Successability(%)	Reliability(%)	Proccessing Time(ms)	Memory Requirment( )	Latency(ms)
1	Video	9.91	9.91	2321.4	89	7.1	90	73	240	180	187.75
2	Video	20.5	20.5	4234.5	80	1.7	81	67	450	360	18.21
3	Video	18.66	18.66	3945.2	86	7.7	95	73	390	340	10.67
4	Video	19.8	19.8	4124.6	86	16.1	86	73	436	350	67
5	Video	14.3	14.3	3100.4	88	1.6	96	73	360	300	7.8
6	Video	35.4	35.4	6750.4	83	14.3	84	73	650	490	16
7	Video	27.3	27.3	5700.1	94	2.1	98	73	570	410	30.84
8	Video	13.2	13.2	2990.4	86	1.2	86	53	220	300	125.18
9	Video	9.5	9.5	2433.7	83	19.7	84	83	190	270	31
10	Video	25.6	25.6	4600.4	86	10.1	95	73	530	400	87.75
11	Video	31.8	31.8	6232.6	72	4.4	72	67	620	470	19
12	Video	17.5	17.5	3744.8	73	2.7	74	73	370	230	40.84
13	Video	7.22	7.22	2145.6	93	4.4	98	73	160	250	26.75
14	Video	33.9	33.9	6540.2	67	0.5	68	73	640	510	1.67
15	Video	23.4	23.4	4520.7	40	3.3	40	73	320	380	13.25
16	Video	16.8	16.8	3740.3	92	6.9	97	60	372	230	83.5
17	Video	14.2	14.2	3020.4	86	1.2	95	73	420	210	1.66
18	Video	11.6	11.6	2466.8	86	14.5	95	73	350	277	10.6
19	Video	15.4	15.4	3180.2	97	6.9	99	73	430	240	8.66
20	Video	28.5	28.5	5800.6	96	1.4	99	67	580	480	6.4
21	Video	24.8	24.8	4570.9	94	36.3	98	73	470	420	1
22	Video	6.53	6.53	2140.3	61	20.3	62	67	320	250	2
23	Video	16.21	16.21	3690.2	95	3.6	95	78	450	390	15
24	Video	9.66	9.66	2280.1	86	3.3	87	53	340	230	96.78
25	Video	12.66	12.66	2840.6	89	15.7	96	73	400	270	5.8
26	Video	10.5	10.5	2366.8	83	13.5	94	71	345	258	9.6
27	Video	10.91	10.91	2322.4	91	8	89	72	238	183	190
28	Video	18.5	18.5	4034.5	78	1.9	82	70	452	355	16.9
29	Video	17.66	17.66	3745.2	84	8.1	94	74	392	337	9.75
30	Video	19.1	19.1	4024.6	83	17	87.5	80	440	348	64
31	Video	15.3	15.3	3200.3	92	1.5	94	72	349	290	8.6
32	Video	30.4	30.4	6550.4	81	16	86	75	652	480	14
33	Video	25.3	25.3	5500.1	91	3	97	76	572	390	29.2
34	Video	12.2	12.2	2890.4	79	2.2	91	55	224	295	110.4
35	Video	8.5	8.5	2333.7	81	23	86	84	191.5	266	29
36	Video	23.6	23.6	4600.4	86	10.1	95	73	530	400	87.75
37	Video	29.8	29.8	6100.6	69	5.5	78	71	623	466	17
38	Video	15.5	15.5	3744.8	73	2.7	74	73	370	230	40.84
39	Video	6.22	6.22	2145.6	93	4.4	98	73	160	250	26.75
40	Video	31.9	31.9	6540.2	67	0.5	68	73	640	510	1.67
41	Video	20.4	20.4	4520.7	40	3.3	40	73	320	380	13.25
42	Video	14.8	14.8	3740.3	92	6.9	97	60	372	230	83.5
43	Video	12.2	12.2	3020.4	86	1.2	95	73	420	210	1.66
44	Video	10.6	10.6	2466.8	86	14.5	95	73	350	277	10.6
45	Video	13.4	13.4	3180.2	97	6.9	99	73	430	240	8.66
46	Video	26.5	26.5	5800.6	96	1.4	99	67	580	480	6.4
47	Video	21.8	21.8	4570.9	94	36.3	98	73	470	420	1.6
48	Video	3.53	3.53	2140.3	61	20.3	62	67	320	250	1.98
49	Video	13.21	13.21	3690.2	95	3.6	95	78	450	390	15
50	Video	7.66	7.66	2280.1	86	3.3	87	53	340	230	96.78
51	Video	9.66	9.66	2750.6	85	18.6	98	78	406	277	8.2
52	Video	8.5	8.5	2266.5	79	15.6	96	74	355	245	7.8
53	Video	6.91	6.91	2321.4	89	7.1	90	73	240	180	187.75
54	Video	18.5	18.5	4134.5	81	2.1	83	68	453	357	17
55	Video	17.66	17.66	3745.2	85	8	93	76	389	338	11.2
56	Video	18.8	18.8	4024.6	85	16.4	87	74	440	340	65
57	Video	13.3	13.3	3050.4	86	2.1	97	66	358	295	8.1
58	Video	34.4	34.4	6650.4	82	15	86	69	653	492	17
59	Video	257.3	257.3	5600.1	90	2.4	88	72	573	399	29.3
60	Video	12.2	12.2	2890.4	84	1.4	88	58	230	289	115
61	Video	8.5	8.5	2233.7	81	20	84	85	192	275	29
62	Video	23.6	23.6	4500.4	79	12	96	75	538	397	86.9
63	Video	30.8	30.8	6132.6	70	5.1	74	70	625	466	18
64	Video	16.5	16.5	3644.8	71	3.6	78	75	380	225	39
65	Video	6.22	6.22	2045.6	91	5.9	97	79	165	245	28.2
66	Video	31.9	31.9	6440.2	65	1.2	70	74.5	635	498	6.5
67	Video	22.4	22.4	4420.7	38	4.1	45	78	331	379	15.3
68	Video	15.8	15.8	3640.3	91.5	8.3	95	62	380	240	79.2
69	Video	12.2	12.2	2900.4	83	3.2	97	81	429	195	3.6
70	Video	10.6	10.6	2366.8	83	22.5	93	78	359	266	9.7
71	Video	14.4	14.4	3180.2	97	6.9	99	73	430	240	8.66
72	Video	27.5	27.5	5700.6	93	2.9	95	71	585	394	5.9
73	Video	22.8	22.8	4470.9	91	55.2	97	73	470	420	3.1
74	Video	5.53	5.53	2140.1	59	21	63	66	322	260	2.5
75	Video	14.21	14.21	3590.2	94	4.2	96	80	451	401	14
76	Video	8.66	8.66	2180.1	85	4.3	89	60	351	235	98
77	Video	11.66	11.66	2740.6	80	17.2	95	72	402	272	6.3
78	Video	9.5	9.5	22366.8	59	22	63	67	322	260	3.2
79	Video	10.21	10.21	2122.4	66	27	66	70	330	266	4.2
80	Video	17.5	17.5	4034.5	78	1.9	82	70	452	355	16.9
81	Video	16.66	16.66	3745.2	84	8.1	94	74	392	337	9.75
82	Video	18.1	18.1	4024.6	83	17	87.5	80	440	348	64
83	Video	14.3	14.3	3200.3	92	1.5	94	72	349	290	8.6
84	Video	29.4	29.4	6550.4	81	16	86	75	652	480	14
85	Video	24.3	24.3	5500.1	91	3	97	76	572	390	29.2
86	Video	11.2	11.2	2890.4	79	2.2	91	55	224	295	110.4
87	Video	7.5	7.5	2333.7	81	23	86	84	191.5	266	29
88	Video	22.6	22.6	4600.4	86	10.1	95	73	530	400	87.75
89	Video	28.8	28.8	6100.6	69	5.5	78	71	623	466	17
90	Video	14.5	14.5	3744.8	73	2.7	74	73	370	230	40.84
91	Video	5.27	5.27	2145.6	93	4.4	98	73	160	250	26.75
92	Video	29.9	29.9	6540.2	67	0.5	68	73	640	510	1.67
93	Video	19.4	19.4	4520.7	40	3.3	40	73	320	380	13.25
94	Video	13.8	13.8	3740.3	92	6.9	97	60	372	230	83.5
95	Video	11.2	11.2	3020.4	86	1.2	95	73	420	210	1.66
96	Video	9.6	9.6	2466.8	86	14.5	95	73	350	277	10.6
97	Video	12.4	12.4	3180.2	97	6.9	99	73	430	240	8.66
98	Video	25.5	25.5	5800.6	96	1.4	99	67	580	480	6.4
99	Video	20.8	20.8	4570.9	94	36.3	98	73	475	390	1
100	Video	2.53	2.53	2140.3	61	20.3	62	67	322	255	1.75
101	Video	11.21	11.21	3690.2	95	3.6	95	78	450	390	15
102	Video	6.66	6.66	2080.1	78	4.5	90	60	350	227	88.5
103	Video	8.66	8.66	2650.6	81	21	97	82	520	280	12.2
104	Video	7.5	7.5	2166.5	78	17	95	78	360	240	8.9
105	Video	10.5	10.5	2750.6	85	18.6	98	78	406	277	8.2
106	Video	12.6	12.6	2266.5	79	15.6	96	74	355	245	7.8
107	Video	14.02	14.02	2321.4	89	7.1	90	73	240	180	187.75
108	Video	9.5	9.5	5800.6	96	1.4	99	67	580	480	6.4
109	Video	15.23	15.23	4570.9	94	36.3	98	73	475	390	1
110	Video	21.01	21.01	2140.3	61	20.3	62	67	322	255	1.75
111	Video	18.2	18.2	3690.2	95	3.6	95	78	450	390	15
112	Video	17.9	17.9	2650.6	81	21	97	82	520	280	12.2
113	Video	14.9	14.9	2166.5	78	17	95	78	360	240	8.9
114	Video	12	12	2750.6	85	18.6	98	78	406	277	8.2
115	Video	13	13	2266.5	79	15.6	96	74	355	245	7.8
116	Video	22	22	4034.5	78	1.9	82	70	452	355	16.9
117	Video	24	24	3745.2	84	8.1	94	74	392	337	9.75
118	Video	26	26	4024.6	83	17	87.5	80	440	348	64
119	Video	13	13	3200.3	92	1.5	94	72	349	290	8.6
120	Video	16	16	6550.4	81	16	86	75	652	480	14
121	Video	19	19	5500.1	91	3	97	76	572	390	29.2
122	Video	15.5	15.5	2890.4	79	2.2	91	55	224	295	110.4
123	Video	14.8	14.8	2333.7	81	23	86	84	191.5	266	29
124	Video	11.7	11.7	4600.4	86	10.1	95	73	530	400	87.75
125	Video	11.5	11.5	6100.6	69	5.5	78	71	623	466	17
126	Video	13.01	13.01	4600.4	86	10.1	95	73	530	400	87.75
127	Video	16.5	16.5	6100.6	69	5.5	78	71	623	466	17
128	Video	19.8	19.8	3744.8	73	2.7	74	73	370	230	40.84
129	Video	20.3	20.3	2145.6	93	4.4	98	73	160	250	26.75
130	Video	26.4	26.4	6540.2	67	0.5	68	73	640	510	1.67
131	Video	31.01	31.01	4520.7	40	3.3	40	73	320	380	13.25
132	Video	15.02	15.02	3740.3	92	6.9	97	60	372	230	83.5
133	Video	18.04	18.04	3020.4	86	1.2	95	73	420	210	1.66
134	Video	19.06	19.06	2466.8	86	14.5	95	73	350	277	10.6
135	Video	24.01	24.01	3180.2	97	6.9	99	73	430	240	8.66
136	Video	25.09	25.09	5800.6	96	1.4	99	67	580	480	6.4
137	Video	8.02	8.02	3745.2	84	8.1	94	74	392	337	9.75
138	Video	9.08	9.08	4024.6	83	17	87.5	80	440	348	64
139	Video	10.09	10.09	3200.3	92	1.5	94	72	349	290	8.6
140	Video	18.04	18.04	6550.4	81	16	86	75	652	480	14
141	Video	19.07	19.07	5500.1	91	3	97	76	572	390	29.2
142	Video	22.01	22.01	2890.4	79	2.2	91	55	224	295	110.4
143	Video	26.08	26.08	2333.7	81	23	86	84	191.5	266	29
144	Video	27.06	27.06	4600.4	86	10.1	95	73	530	400	87.75
145	Video	30.01	30.01	6100.6	69	5.5	78	71	623	466	17
146	Video	33.05	33.05	3744.8	73	2.7	74	73	370	230	40.84
147	Video	32.04	32.04	2145.6	93	4.4	98	73	160	250	26.75
148	Video	36.05	36.05	6540.2	67	0.5	68	73	640	510	1.67
149	Video	13.02	13.02	2633.7	83	19.7	84	83	190	270	31
150	Video	14.06	14.06	4700.4	86	10.1	95	73	530	400	87.75
151	Video	15.07	15.07	6332.6	72	4.4	72	67	620	470	19
152	Video	11.91	11.91	2421.4	89	7.1	90	73	240	180	187.75
153	Video	22.5	22.5	4334.5	80	1.7	81	67	450	360	18.21
154	Video	20.66	20.66	4145.2	86	7.7	95	73	390	340	10.67
155	Video	21.8	21.8	4224.6	86	16.1	86	73	436	350	67
156	Video	16.3	16.3	3200.4	88	1.6	96	73	360	300	7.8
157	Video	37.4	37.4	6850.4	83	14.3	84	73	650	490	16
158	Video	29.3	29.3	5900.1	94	2.1	98	73	570	410	30.84
159	Video	15.2	15.2	3190.4	86	1.2	86	53	220	300	125.18
160	Video	11.5	11.5	2633.7	83	19.7	84	83	190	270	31
161	Video	27.6	27.6	4700.4	86	10.1	95	73	530	400	87.75
162	Video	34.8	34.8	6332.6	72	4.4	72	67	620	470	19
163	Video	20.5	20.5	3944.8	73	2.7	74	73	370	230	40.84
164	Video	9.22	9.22	2345.6	93	4.4	98	73	160	250	26.75
165	Video	35.9	35.9	6640.2	67	0.5	68	73	640	510	1.67
166	Video	26.4	26.4	4720.7	40	3.3	40	73	320	380	13.25
167	Video	18.8	18.8	3940.3	92	6.9	97	60	372	230	83.5
168	Video	15.4	15.4	3180.2	86	1.2	95	73	420	210	1.66
169	Video	11.6	11.6	2466.8	86	14.5	95	73	350	277	10.6
170	Video	15.4	15.4	3180.2	97	6.9	99	73	430	240	8.66
171	Video	12.66	12.66	2840.6	96	1.4	99	67	580	480	6.4
172	Video	25.3	25.3	5500.1	94	36.3	98	73	470	420	1
173	Video	9.66	9.66	2280.1	61	20.3	62	67	320	250	2
174	Video	18.5	18.5	4034.5	95	3.6	95	78	450	390	15
175	Video	10.5	10.5	2366.8	86	3.3	87	53	340	230	96.78
176	Video	15.5	15.5	3744.8	89	15.7	96	73	400	270	5.8
177	Video	10.91	10.91	2322.4	83	13.5	94	71	345	258	9.6
178	Video	12.2	12.2	2890.4	91	8	89	72	238	183	190
179	Video	19.1	19.1	4024.6	78	1.9	82	70	452	355	16.9
180	Video	18.9	18.9	3980.3	84	8.1	94	74	392	337	9.75
181	Video	21.1	21.1	4124.6	83	17	87.5	80	440	348	64
182	Video	15.5	15.5	3744.8	92	1.5	94	72	349	290	8.6
183	Video	31.9	31.9	6540.2	81	16	86	75	652	480	14
184	Video	25.3	25.3	5500.1	91	3	97	76	572	390	29.2
185	Video	12.2	12.2	2890.4	79	2.2	91	55	224	295	110.4
186	Video	8.5	8.5	2333.7	81	23	86	84	191.5	266	29
187	Video	23.6	23.6	4600.4	86	10.1	95	73	530	400	87.75
188	Video	34.4	34.4	6650.4	69	5.5	78	71	623	466	17
189	Video	17.66	17.66	3745.2	73	2.7	74	73	370	230	40.84
190	Video	8.5	8.5	2266.5	93	4.4	98	73	160	250	26.75
191	Video	34.4	34.4	6650.4	67	0.5	68	73	640	510	1.67
192	Video	21.8	21.8	4570.9	40	3.3	40	73	320	380	13.25
193	Video	17.66	17.66	3745.2	92	6.9	97	60	372	230	83.5
194	Video	13.4	13.4	3180.2	86	1.2	95	73	420	210	1.66
195	Video	13.21	13.21	3690.2	86	14.5	95	73	350	277	10.6
196	Video	17.66	17.66	3745.2	97	6.9	99	73	430	240	8.66
197	Video	28.5	28.5	5900.6	96	1.4	99	67	580	480	6.4
198	Video	21.8	21.8	4570.9	94	36.3	98	73	470	420	1
199	Video	3.53	3.53	2140.3	61	20.3	62	67	320	250	2
200	Video	15.21	15.21	3790.2	95	3.6	95	78	450	390	15
201	Video	8.66	8.66	2380.1	86	3.3	87	53	340	230	96.78
202	Video	11.66	11.66	2850.6	85	18.6	98	78	406	277	8.2
203	Video	9.5	9.5	2366.5	79	15.6	96	74	355	245	7.8
204	Video	8.91	8.91	2421.4	89	7.1	90	73	240	180	187.75
205	Video	20.5	20.5	4234.5	81	2.1	83	68	453	357	17
206	Video	19.66	19.66	3845.2	85	8	93	76	389	338	11.2
207	Video	21.8	21.8	4224.6	85	16.4	87	74	440	340	65
208	Video	15.3	15.3	3250.4	86	2.1	97	66	358	295	8.1
209	Video	37.4	37.4	6850.4	82	15	86	69	653	492	17
210	Video	59.3	59.3	5700.1	90	2.4	88	72	573	399	29.3
211	Video	13.2	13.2	2990.4	84	1.4	88	58	230	289	115
212	Video	9.5	9.5	2133.7	81	20	84	85	192	275	29
213	Video	24.6	24.6	4600.4	79	12	96	75	538	397	86.9
214	Video	32.8	32.8	6332.6	70	5.1	74	70	625	466	18
215	Video	17.5	17.5	3744.8	71	3.6	78	75	380	225	39
216	Video	7.22	7.22	2145.6	91	5.9	97	79	165	245	28.2
217	Video	32.9	32.9	6540.2	65	1.2	70	74.5	635	498	6.5
218	Video	23.4	23.4	4520.7	38	4.1	45	78	331	379	15.3
219	Video	16.8	16.8	3740.3	91.5	8.3	95	62	380	240	79.2
220	Video	13.2	13.2	2950.4	83	3.2	97	81	429	195	3.6
221	Video	12.6	12.6	2566.8	83	22.5	93	78	359	266	9.7
222	Video	15.4	15.4	3380.2	97	6.9	99	73	430	240	8.66
223	Video	29.5	29.5	5800.6	93	2.9	95	71	585	394	5.9
224	Video	24.8	24.8	4670.9	91	55.2	97	73	470	420	1
225	Video	7.53	7.53	2340.1	59	21	63	66	322	260	2.5
226	Video	16.21	16.21	3690.2	94	4.2	96	80	451	401	14
227	Video	9.66	9.66	2380.1	85	4.3	89	60	351	235	98
228	Video	13.66	13.66	2940.6	80	17.2	95	72	402	272	6.3
229	Video	11.5	11.5	2366.8	59	22	63	67	322	260	3.2
230	Video	12.21	12.21	2222.4	66	27	66	70	330	266	4.2
231	Video	19.5	19.5	4234.5	78	1.9	82	70	452	355	16.9
232	Video	17.66	17.66	3845.2	84	8.1	94	74	392	337	9.75
233	Video	19.1	19.1	4124.6	83	17	87.5	80	440	348	64
234	Video	16.3	16.3	3300.3	92	1.5	94	72	349	290	8.6
235	Video	31.4	31.4	6650.4	81	16	86	75	652	480	14
236	Video	26.3	26.3	5600.1	91	3	97	76	572	390	29.2
237	Video	13.2	13.2	2990.4	79	2.2	91	55	224	295	110.4
238	Video	8.5	8.5	2433.7	81	23	86	84	191.5	266	29
239	Video	24.6	24.6	4800.4	86	10.1	95	73	530	400	87.75
240	Video	29.8	29.8	6300.6	69	5.5	78	71	623	466	17
241	Video	16.5	16.5	3844.8	73	2.7	74	73	370	230	40.84
242	Video	6.27	6.27	2245.6	93	4.4	98	73	160	250	26.75
243	Video	30.9	30.9	6640.2	67	0.5	68	73	640	510	1.67
244	Video	21.4	21.4	4720.7	40	3.3	40	73	320	380	13.25
245	Video	14.8	14.8	3840.3	92	6.9	97	60	372	230	83.5
246	Video	13.2	13.2	3120.4	86	1.2	95	73	420	210	1.66
247	Video	11.6	11.6	2566.8	86	14.5	95	73	350	277	10.6
248	Video	13.4	13.4	3280.2	97	6.9	99	73	430	240	8.66
249	Video	26.5	26.5	5900.6	96	1.4	99	67	580	480	6.4
250	Video	21.8	21.8	4670.9	94	36.3	98	73	475	390	1
251	Video	3.53	3.53	2240.3	61	20.3	62	67	322	255	1.75
252	Video	12.21	12.21	3790.2	95	3.6	95	78	450	390	15
253	Video	7.66	7.66	2280.1	78	4.5	90	60	350	227	88.5
254	Video	11.66	11.66	2950.6	81	21	97	82	520	280	12.2
255	Video	9.5	9.5	2366.5	78	17	95	78	360	240	8.9
256	Video	12.5	12.5	3280.2	97	6.9	99	73	430	240	8.66
257	Video	11.91	11.91	2421.4	89	7.1	90	73	240	180	187.75
258	Video	22.5	22.5	4334.5	80	1.7	81	67	450	360	18.21
259	Video	20.66	20.66	4145.2	86	7.7	95	73	390	340	10.67
260	Video	21.8	21.8	4224.6	86	16.1	86	73	436	350	67
261	Video	16.3	16.3	3200.4	88	1.6	96	73	360	300	7.8
262	Video	37.4	37.4	6850.4	83	14.3	84	73	650	490	16
263	Video	29.3	29.3	5900.1	94	2.1	98	73	570	410	30.84
264	Video	15.2	15.2	3190.4	86	1.2	86	53	220	300	125.18
265	Video	11.5	11.5	2633.7	83	19.7	84	83	190	270	31
266	Video	27.6	27.6	4700.4	86	10.1	95	73	530	400	87.75
267	Video	34.8	34.8	6332.6	72	4.4	72	67	620	470	19
268	Video	20.5	20.5	3944.8	73	2.7	74	73	370	230	40.84
269	Video	9.22	9.22	2345.6	93	4.4	98	73	160	250	26.75
270	Video	35.9	35.9	6640.2	67	0.5	68	73	640	510	1.67
271	Video	26.4	26.4	4720.7	40	3.3	40	73	320	380	13.25
272	Video	18.8	18.8	3940.3	92	6.9	97	60	372	230	83.5
273	Video	15.4	15.4	3180.2	86	1.2	95	73	420	210	1.66
274	Video	11.6	11.6	2466.8	86	14.5	95	73	350	277	10.6
275	Video	15.4	15.4	3180.2	97	6.9	99	73	430	240	8.66
276	Video	12.66	12.66	2840.6	96	1.4	99	67	580	480	6.4
277	Video	25.3	25.3	5500.1	94	36.3	98	73	470	420	1
278	Video	9.66	9.66	2280.1	61	20.3	62	67	320	250	2
279	Video	18.5	18.5	4034.5	95	3.6	95	78	450	390	15
280	Video	10.5	10.5	2366.8	86	3.3	87	53	340	230	96.78
281	Video	15.5	15.5	3744.8	89	15.7	96	73	400	270	5.8
282	Video	10.91	10.91	2322.4	83	13.5	94	71	345	258	9.6
283	Video	12.2	12.2	2890.4	91	8	89	72	238	183	190
284	Video	19.1	19.1	4024.6	78	1.9	82	70	452	355	16.9
285	Video	18.9	18.9	3980.3	84	8.1	94	74	392	337	9.75
286	Video	21.1	21.1	4124.6	83	17	87.5	80	440	348	64
287	Video	15.5	15.5	3744.8	92	1.5	94	72	349	290	8.6
288	Video	31.9	31.9	6540.2	81	16	86	75	652	480	14
289	Video	25.3	25.3	5500.1	91	3	97	76	572	390	29.2
290	Video	12.2	12.2	2890.4	79	2.2	91	55	224	295	110.4
291	Video	8.5	8.5	2333.7	81	23	86	84	191.5	266	29
292	Video	23.6	23.6	4600.4	86	10.1	95	73	530	400	87.75
293	Video	34.4	34.4	6650.4	69	5.5	78	71	623	466	17
294	Video	17.66	17.66	3745.2	73	2.7	74	73	370	230	40.84
295	Video	11.91	11.91	2421.4	89	7.1	90	73	240	180	187.75
296	Video	22.5	22.5	4334.5	80	1.7	81	67	450	360	18.21
297	Video	20.66	20.66	4145.2	86	7.7	95	73	390	340	10.67
298	Video	21.8	21.8	4224.6	86	16.1	86	73	436	350	67
299	Video	16.3	16.3	3200.4	88	1.6	96	73	360	300	7.8
300	Video	37.4	37.4	6850.4	83	14.3	84	73	650	490	16
301	Video	29.3	29.3	5900.1	94	2.1	98	73	570	410	30.84
302	Video	15.2	15.2	3190.4	86	1.2	86	53	220	300	125.18
303	Video	11.5	11.5	2633.7	83	19.7	84	83	190	270	31
304	Video	27.6	27.6	4700.4	86	10.1	95	73	530	400	87.75
305	Video	34.8	34.8	6332.6	72	4.4	72	67	620	470	19
306	Video	20.5	20.5	3944.8	73	2.7	74	73	370	230	40.84
307	Video	9.22	9.22	2345.6	93	4.4	98	73	160	250	26.75
308	Video	35.9	35.9	6640.2	67	0.5	68	73	640	510	1.67
309	Video	26.4	26.4	4720.7	40	3.3	40	73	320	380	13.25
310	Video	18.8	18.8	3940.3	92	6.9	97	60	372	230	83.5
311	Video	15.4	15.4	3180.2	86	1.2	95	73	420	210	1.66
312	Video	11.6	11.6	2466.8	86	14.5	95	73	350	277	10.6
313	Video	15.4	15.4	3180.2	97	6.9	99	73	430	240	8.66
314	Video	9.22	9.22	2345.6	93	4.4	98	73	160	250	26.75
315	Video	35.9	35.9	6640.2	67	0.5	68	73	640	510	1.67
316	Video	26.4	26.4	4720.7	40	3.3	40	73	320	380	13.25
317	Video	18.8	18.8	3940.3	92	6.9	97	60	372	230	83.5
318	Video	15.4	15.4	3180.2	86	1.2	95	73	420	210	1.66
319	Video	11.6	11.6	2466.8	86	14.5	95	73	350	277	10.6
320	Video	15.4	15.4	3180.2	97	6.9	99	73	430	240	8.66
321	Video	12.66	12.66	2840.6	96	1.4	99	67	580	480	6.4
322	Video	25.3	25.3	5500.1	94	36.3	98	73	470	420	1
323	Video	9.66	9.66	2280.1	61	20.3	62	67	320	250	2
324	Video	18.5	18.5	4034.5	95	3.6	95	78	450	390	15
325	Video	10.5	10.5	2366.8	86	3.3	87	53	340	230	96.78
326	Video	15.5	15.5	3744.8	89	15.7	96	73	400	270	5.8
327	Video	10.91	10.91	2322.4	83	13.5	94	71	345	258	9.6
328	Video	12.2	12.2	2890.4	91	8	89	72	238	183	190
329	Video	19.1	19.1	4024.6	78	1.9	82	70	452	355	16.9
330	Video	18.9	18.9	3980.3	84	8.1	94	74	392	337	9.75
331	Video	21.1	21.1	4124.6	83	17	87.5	80	440	348	64
332	Video	15.5	15.5	3744.8	92	1.5	94	72	349	290	8.6
333	Video	18.5	18.5	4034.5	95	3.6	95	78	450	390	15
334	Video	10.5	10.5	2366.8	86	3.3	87	53	340	230	96.78
335	Video	15.5	15.5	3744.8	89	15.7	96	73	400	270	5.8
336	Video	10.91	10.91	2322.4	83	13.5	94	71	345	258	9.6
337	Video	12.2	12.2	2890.4	91	8	89	72	238	183	190
338	Video	19.1	19.1	4024.6	78	1.9	82	70	452	355	16.9
339	Video	18.9	18.9	3980.3	84	8.1	94	74	392	337	9.75
340	Video	21.1	21.1	4124.6	83	17	87.5	80	440	348	64
341	Video	15.5	15.5	3744.8	92	1.5	94	72	349	290	8.6
342	Video	9.91	9.91	2321.4	89	7.1	90	73	240	180	187.75
343	Video	20.5	20.5	4234.5	80	1.7	81	67	450	360	18.21
344	Video	18.66	18.66	3945.2	86	7.7	95	73	390	340	10.67
345	Video	19.8	19.8	4124.6	86	16.1	86	73	436	350	67
346	Video	14.3	14.3	3100.4	88	1.6	96	73	360	300	7.8
347	Video	35.4	35.4	6750.4	83	14.3	84	73	650	490	16
348	Video	27.3	27.3	5700.1	94	2.1	98	73	570	410	30.84
349	Video	13.2	13.2	2990.4	86	1.2	86	53	220	300	125.18
350	Video	9.5	9.5	2433.7	83	19.7	84	83	190	270	31
351	Video	25.6	25.6	4600.4	86	10.1	95	73	530	400	87.75
352	Video	31.8	31.8	6232.6	72	4.4	72	67	620	470	19
353	Video	17.5	17.5	3744.8	73	2.7	74	73	370	230	40.84
354	Video	7.22	7.22	2145.6	93	4.4	98	73	160	250	26.75
355	Video	33.9	33.9	6540.2	67	0.5	68	73	640	510	1.67
356	Video	23.4	23.4	4520.7	40	3.3	40	73	320	380	13.25
357	Video	16.8	16.8	3740.3	92	6.9	97	60	372	230	83.5
358	Video	14.2	14.2	3020.4	86	1.2	95	73	420	210	1.66
359	Video	11.6	11.6	2466.8	86	14.5	95	73	350	277	10.6
360	Video	15.4	15.4	3180.2	97	6.9	99	73	430	240	8.66
361	Video	28.5	28.5	5800.6	96	1.4	99	67	580	480	6.4
362	Video	24.8	24.8	4570.9	94	36.3	98	73	470	420	1
363	Video	6.53	6.53	2140.3	61	20.3	62	67	320	250	2
364	Video	16.21	16.21	3690.2	95	3.6	95	78	450	390	15
365	Video	9.66	9.66	2280.1	86	3.3	87	53	340	230	96.78
366	Video	12.66	12.66	2840.6	89	15.7	96	73	400	270	5.8
367	Video	10.5	10.5	2366.8	83	13.5	94	71	345	258	9.6
368	Video	10.91	10.91	2322.4	91	8	89	72	238	183	190
369	Video	18.5	18.5	4034.5	78	1.9	82	70	452	355	16.9
370	Video	17.66	17.66	3745.2	84	8.1	94	74	392	337	9.75
371	Video	19.1	19.1	4024.6	83	17	87.5	80	440	348	64
372	Video	15.3	15.3	3200.3	92	1.5	94	72	349	290	8.6
373	Video	30.4	30.4	6550.4	81	16	86	75	652	480	14
374	Video	25.3	25.3	5500.1	91	3	97	76	572	390	29.2
375	Video	12.2	12.2	2890.4	79	2.2	91	55	224	295	110.4
376	Video	8.5	8.5	2333.7	81	23	86	84	191.5	266	29
377	Video	23.6	23.6	4600.4	86	10.1	95	73	530	400	87.75
378	Video	29.8	29.8	6100.6	69	5.5	78	71	623	466	17
379	Video	15.5	15.5	3744.8	73	2.7	74	73	370	230	40.84
380	Video	6.22	6.22	2145.6	93	4.4	98	73	160	250	26.75
381	Video	31.9	31.9	6540.2	67	0.5	68	73	640	510	1.67
382	Video	20.4	20.4	4520.7	40	3.3	40	73	320	380	13.25
383	Video	14.8	14.8	3740.3	92	6.9	97	60	372	230	83.5
384	Video	12.2	12.2	3020.4	86	1.2	95	73	420	210	1.66
385	Video	10.6	10.6	2466.8	86	14.5	95	85	350	277	10.6
386	Video	13.4	13.4	3180.2	97	6.9	99	79	430	240	8.66
387	Video	26.5	26.5	5800.6	96	1.4	99	67	580	480	6.4
388	Video	21.8	21.8	4570.9	94	36.3	98	73	470	420	1
389	Video	3.53	3.53	2140.3	61	20.3	62	67	320	250	2
390	Video	13.21	13.21	3690.2	95	3.6	95	78	450	390	15
391	Video	7.66	7.66	2280.1	86	3.3	87	53	340	230	96.78
392	Video	9.66	9.66	2750.6	85	18.6	98	78	406	277	8.2
393	Video	8.5	8.5	2266.5	79	15.6	96	74	355	245	7.8
394	Video	6.91	6.91	2321.4	89	7.1	90	73	240	180	187.75
395	Video	18.5	18.5	4134.5	81	2.1	83	68	453	357	17
396	Video	17.66	17.66	3745.2	85	8	93	76	389	338	11.2
397	Video	18.8	18.8	4024.6	85	16.4	87	74	440	340	65
398	Video	13.3	13.3	3050.4	86	2.1	97	66	358	295	8.1
399	Video	34.4	34.4	6650.4	82	15	86	69	653	492	17
400	Video	257.3	257.3	5600.1	90	2.4	88	72	573	399	29.3
401	Video	12.2	12.2	2890.4	84	1.4	88	58	230	289	115
402	Video	8.5	8.5	2233.7	81	20	84	85	192	275	29
403	Video	23.6	23.6	4500.4	79	12	96	75	538	397	86.9
404	Video	30.8	30.8	6132.6	70	5.1	74	70	625	466	18
405	Video	16.5	16.5	3644.8	71	3.6	78	75	380	225	39
406	Video	6.22	6.22	2045.6	91	5.9	97	79	165	245	28.2
407	Video	31.9	31.9	6440.2	65	1.2	70	74.5	635	498	6.5
408	Video	22.4	22.4	4420.7	38	4.1	45	78	331	379	15.3
409	Video	15.8	15.8	3640.3	91.5	8.3	95	62	380	240	79.2
410	Video	12.2	12.2	2900.4	83	3.2	97	81	429	195	3.6
411	Video	10.6	10.6	2366.8	83	22.5	93	78	359	266	9.7
412	Video	14.4	14.4	3180.2	97	6.9	99	73	430	240	8.66
413	Video	27.5	27.5	5700.6	93	2.9	95	71	585	394	5.9
414	Video	22.8	22.8	4470.9	91	55.2	97	73	470	420	1
415	Video	5.53	5.53	2140.1	59	21	63	66	322	260	2.5
416	Video	14.21	14.21	3590.2	94	4.2	96	80	451	401	14
417	Video	8.66	8.66	2180.1	85	4.3	89	60	351	235	98
418	Video	11.66	11.66	2740.6	80	17.2	95	72	402	272	6.3
419	Video	9.5	9.5	22366.8	59	22	63	67	322	260	3.2
420	Video	10.21	10.21	2122.4	66	27	66	70	330	266	4.2
421	Video	17.5	17.5	4034.5	78	1.9	82	70	452	355	16.9
422	Video	16.66	16.66	3745.2	84	8.1	94	74	392	337	9.75
423	Video	18.1	18.1	4024.6	83	17	87.5	80	440	348	64
424	Video	14.3	14.3	3200.3	92	1.5	94	72	349	290	8.6
425	Video	29.4	29.4	6550.4	81	16	86	75	652	480	14
426	Video	24.3	24.3	5500.1	91	3	97	76	572	390	29.2
427	Video	11.2	11.2	2890.4	79	2.2	91	55	224	295	110.4
428	Video	7.5	7.5	2333.7	81	23	86	84	191.5	266	29
429	Video	22.6	22.6	4600.4	86	10.1	95	73	530	400	87.75
430	Video	28.8	28.8	6100.6	69	5.5	78	71	623	466	17
431	Video	14.5	14.5	3744.8	73	2.7	74	73	370	230	40.84
432	Video	5.27	5.27	2145.6	93	4.4	98	73	160	250	26.75
433	Video	29.9	29.9	6540.2	67	0.5	68	73	640	510	1.67
434	Video	19.4	19.4	4520.7	40	3.3	40	73	320	380	13.25
435	Video	13.8	13.8	3740.3	92	6.9	97	60	372	230	83.5
436	Video	11.2	11.2	3020.4	86	1.2	95	73	420	210	1.66
437	Video	9.6	9.6	2466.8	86	14.5	95	73	350	277	10.6
438	Video	12.4	12.4	3180.2	97	6.9	99	73	430	240	8.66
439	Video	25.5	25.5	5800.6	96	1.4	99	67	580	480	6.4
440	Video	20.8	20.8	4570.9	94	36.3	98	73	475	390	1
441	Video	2.53	2.53	2140.3	61	20.3	62	67	322	255	1.75
442	Video	11.21	11.21	3690.2	95	3.6	95	78	450	390	15
443	Video	6.66	6.66	2080.1	78	4.5	90	60	350	227	88.5
444	Video	8.66	8.66	2650.6	81	21	97	82	520	280	12.2
445	Video	7.5	7.5	2166.5	78	17	95	78	360	240	8.9
446	Video	5.27	5.27	2070.3	80	20	96	81	355	233	9
447	Video	30.9	30.9	6550.7	70	7	80	72.5	618	466	17
448	Video	21.4	21.4	4550.4	75	8.2	83	75	540	420	15
449	Video	15.8	15.8	3550.8	80	9.6	90	75	320	350	13
450	Video	12.2	12.2	2550.6	77	8.1	87	74	350	402	16
451	Video	12.6	12.6	2580.2	77.5	8.3	88	76	355	410	16.5
452	Video	14.4	14.4	3520.5	76	6.5	89	72.5	470	280	6.4
453	Video	27.5	27.5	2140.3	84	8.2	78	67	320	240	9.75
454	Video	22.8	22.8	3690.2	83	7.77	79	70	450	277	64
455	Video	4.53	4.53	2080.1	92	9.3	81	81	340	245	8.6
456	Video	15.21	15.21	2650.6	81	12.1	83	83	400	180	14
457	Video	8.66	8.66	2166.5	91	9.6	84	75	345	480	29.2
458	Video	23.8	23.8	2750.6	79	10.2	74	71	238	390	110.4
459	Video	6.53	6.53	2266.5	81	12	72	79	452	255	29
460	Video	15.21	15.21	2321.4	86	11.4	71	81	392	390	87.75
461	Video	8.66	8.66	5800.6	69	13.5	76	68	440	280	17
462	Video	23.8	23.8	4570.9	73	16	66	91	349	240	40.84
463	Video	5.53	5.53	2140.3	93	17	75	81	652	277	26.75
464	Video	13.21	13.21	3690.2	67	14.2	76	77	572	245	1.67
465	Video	7.66	7.66	2650.6	40	7	78	88	224	355	31
466	Video	24.8	24.8	2166.5	92	9	74	75	191.5	337	87.75
467	Video	3.53	3.53	2750.6	86	11	75	85	530	348	19
468	Video	18.6	18.6	2266.5	86	13	64	95	623	290	187.75
469	Video	15.4	15.4	4034.5	97	12	66	65	370	480	18.21
470	Video	29.5	29.5	3745.2	96	10	69	74	240	390	10.67
471	Video	25.8	25.8	4024.6	94	8.5	68	81	450	295	67
472	Video	7.53	7.53	3200.3	61	9.3	67	83	390	266	7.8
473	Video	16.21	16.21	6550.4	95	8.9	75	86	436	400	16
474	Video	9.66	9.66	5500.1	78	7.4	88	77	360	466	30.84
475	Video	13.66	13.66	2890.4	81	12	90	72	650	400	125.18
476	Video	11.5	11.5	2333.7	78	7	70	73	570	466	31
477	Video	14.21	14.21	4600.4	97	14	67	84	220	230	87.75
478	Video	18.5	18.5	6100.6	89	13	74	86	190	250	19
479	Video	19.66	19.66	4600.4	77	16	73	88	530	510	40.84
480	Video	20.1	20.1	6100.6	86	17	72	82	620	380	26.75
481	Video	16.3	16.3	3744.8	81	7.3	71	73	370	230	1.67
482	Video	33.4	33.4	2145.6	88	8.4	78	77	160	210	13.25
483	Video	27.3	27.3	6540.2	83	6.9	75	75	640	277	83.5
484	Video	13.2	13.2	4520.7	94	8.7	72	74	320	240	1.66
485	Video	9.5	9.5	3740.3	86	9.4	91	82	372	480	10.6
486	Video	24.6	24.6	3020.4	83	3.2	88	81	420	337	8.66
487	Video	30.8	30.8	2466.8	86	22.5	81	91	350	348	6.4
488	Video	17.5	17.5	3180.2	72	6.9	79	94	430	290	1
489	Video	7.27	7.27	5800.6	73	2.9	80	65	160	480	2
490	Video	31.9	31.9	3745.2	93	55.2	81	67	640	390	15
491	Video	21.4	21.4	4024.6	67	21	76	68	320	295	96.78
492	Video	15.8	15.8	3200.3	40	4.2	83	87	372	266	5.8
493	Video	13.2	13.2	6550.4	92	4.3	74	74	420	400	9.6
494	Video	11.6	11.6	5500.1	86	17.2	90	55	350	466	190
495	Video	14.4	14.4	2890.4	86	22	77	65	430	230	16.9
496	Video	27.5	27.5	2333.7	97	27	79	56	580	250	9.75
497	Video	25.8	25.8	4600.4	96	1.9	82	58	470	510	64
498	Video	4.53	4.53	6100.6	94	8.1	83	59	320	270	8.6
1115	PDF	2.02	2.02	580	85	16	95	73	110	90	1
1116	PDF	805	0.786133	460.2	98	1.3	99	67	90	85	40.8
1117	PDF	3.54	3.54	1060.2	90	10.9	97	53	155	100	37.26
1118	PDF	377	0.368164	270.6	85	4.5	86	53	150	50	74.96
1119	PDF	2.65	2.65	840.4	83	10.4	84	83	135	120	3
1120	PDF	3.55	3.55	1360.1	94	10.2	94	73	220	110	48.18
1121	PDF	677	0.661133	380.7	56	5	58	73	75	70	121.46
1122	PDF	3.33	3.33	1350	91	12.4	97	67	78	105	20.8
1123	PDF	2.88	2.88	890.5	100	8.3	100	73	170	130	89
1124	PDF	780	0.761719	440.7	36	0.9	37	60	97	74	15.91
1125	PDF	5.22	5.22	1980	73	1.4	74	58	160	160	12
1126	PDF	3.45	3.45	1400	70	4.8	70	73	220	125	3.63
1127	PDF	3.22	3.22	1240	56	7.5	56	67	130	115	88.31
1128	PDF	4.66	4.66	1670	86	8	86	73	260	140	86.5
1129	PDF	950	0.927734	560	90	3.5	97	60	77	85	48.33
1130	PDF	5.21	5.21	420	23	1.8	24	42	350	260	334.1
1131	PDF	2.88	2.88	440	75	1.2	75	67	210	130	7.84
1132	PDF	4.11	4.11	460	88	7.1	96	73	220	135	13.67
1133	PDF	645	0.629883	480	83	22.3	84	83	50	80	4
1134	PDF	3.44	3.44	1080	96	14.6	99	83	220	130	68.5
1135	PDF	2.55	2.55	1090	69	9.7	70	73	195	120	44.75
1136	PDF	4.66	4.66	1520.7	85	9.4	95	67	250	135	6.66
1137	PDF	1.9	1.9	1020.4	83	31.3	84	73	205	110	3
1138	PDF	2.5	2.5	1170.1	26	3.1	26	67	210	120	4.44
1139	PDF	3.77	3.77	1310.7	97	24.7	99	73	230	127	8.8
1140	PDF	3.5	3.5	1270.1	29	5.2	36	67	210	120	4.44
1141	PDF	7.5	7.5	433.7	83	19.7	84	83	190	270	31
1142	PDF	9.5	9.5	366.8	59	22	63	67	322	260	3.2
1143	PDF	8.6	8.6	2466.8	86	14.5	95	73	350	277	10.6
1144	PDF	7.5	7.5	2266.5	93	4.4	98	73	160	250	26.75
1145	PDF	6.91	6.91	2421.4	89	7.1	90	73	240	180	187.75
1146	PDF	9.5	9.5	2366.5	78	17	95	78	360	240	8.9
1147	PDF	5.5	5.5	2333.7	81	23	86	84	191.5	266	29
1148	PDF	6.5	6.5	2266.5	79	15.6	96	74	355	245	7.8
1149	PDF	3.5	3.5	2233.7	81	20	84	85	192	275	29
1150	PDF	2.5	2.5	3740.3	86	9.4	91	82	372	480	10.6
1151	PDF	6.5	6.5	2633.7	89	3	73	72	345	360	29
1152	PDF	7.91	7.91	2740.6	89	21	98	86	351	195	2.5
1153	PDF	7.22	7.22	2145.6	93	2.2	98	73	160	337	26.75
1154	PDF	4.5	4.5	1366.8	59	22	63	67	322	260	3.2
1155	PDF	5.6	5.6	2466.8	86	14.5	95	73	350	277	10.6
1156	PDF	7.22	7.22	1440.2	97	36.3	68	66	572	400	65
1157	PDF	3.5	3.5	4520.7	70	5.9	96	73	572	295	15
1158	PDF	6.5	6.5	2233.7	81	20	84	85	192	275	29
1159	PDF	4.66	4.66	2180.1	85	4.3	89	60	351	235	98
1160	PDF	7.66	7.66	2080.1	78	4.5	90	60	350	227	88.5
1161	PDF	6.6	6.6	2233.7	81	6.9	95	74	392	337	9.75
1162	PDF	5.5	5.5	2333.7	81	23	86	84	191.5	266	29
1163	PDF	3.5	3.5	2266.5	79	15.6	96	74	355	245	7.8
1164	PDF	6.5	6.5	2633.7	81	1.6	63	75	349	260	3.2
1165	PDF	1.5	1.5	2466.8	83	0.5	86	72	349	266	29
1166	PDF	4.5	4.5	2433.7	83	4.4	95	58	190	290	8.6
1167	PDF	6.5	6.5	2333.7	81	23	86	84	191.5	266	29
1168	PDF	7.5	7.5	2345.6	86	1.5	84	78	640	480	6.4
1169	PDF	2.27	2.27	124.6	83	14.3	45	76	580	277	8.2
1170	PDF	4.66	4.66	2280.1	86	3.3	87	53	340	230	96.78
1171	PDF	6.5	6.5	2266.5	79	15.6	96	74	355	245	7.8
1172	PDF	5.91	5.91	322.4	91	8	89	72	238	183	190
1173	PDF	5.5	5.5	2333.7	81	23	86	84	191.5	266	29
1174	PDF	6.91	6.91	2321.4	89	7.1	90	73	240	180	187.75
1175	PDF	2.5	2.5	2233.7	81	20	84	85	192	275	29
1176	PDF	4.45	4.45	1400	70	4.8	70	73	220	125	3.63
1177	PDF	3.66	3.66	1670	86	8	86	73	260	140	86.5
1178	PDF	2.55	2.55	1100.8	69	9.7	70	73	195	120	44.75
1179	PDF	1.9	1.9	1020.4	83	31.3	84	73	205	110	3
1180	PDF	7.66	7.66	2740.6	80	17.2	95	72	402	272	6.3
1181	PDF	6.21	6.21	2122.4	66	27	66	70	330	266	4.2
1182	PDF	5.21	5.21	3690.2	95	3.6	95	78	450	390	15
1183	PDF	4.66	4.66	2650.6	81	21	97	82	520	280	12.2
1184	PDF	6.02	6.02	3745.2	84	8.1	94	74	392	337	9.75
1185	PDF	4.09	4.09	3200.3	92	1.5	94	72	349	290	8.6
1186	PDF	5.91	5.91	1360.1	94	10.2	94	73	220	110	48.18
1187	PDF	6.2	6.2	1350	91	12.4	97	67	78	105	20.8
1188	PDF	8.3	8.3	560	90	3.5	97	60	77	85	48.33
1189	PDF	4.22	4.22	1220.4	75	1.2	75	67	210	130	7.84
1190	PDF	3.6	3.6	2890.4	86	14.5	95	73	350	277	10.6
1191	PDF	4.66	4.66	2266.5	86	3.3	87	53	340	230	96.78
1192	PDF	5.66	5.66	2145.6	74	14.5	95	73	350	277	10.6
1193	PDF	3.91	3.91	2380.1	89	18.6	98	78	406	277	8.2
1194	PDF	4.6	4.6	1670	83	22.5	93	78	359	266	9.7
1195	PDF	5.6	5.6	420	85	4.3	89	60	351	235	98
1196	PDF	4.11	4.11	1020.4	86	1.2	95	73	420	210	1.66
1197	PDF	645	0.629883	3740.3	86	9.4	91	82	372	480	10.6
1198	PDF	3.44	3.44	2633.7	89	3	73	72	345	360	29
1199	PDF	2.55	2.55	2740.6	89	21	98	86	351	195	2.5
1200	PDF	4.66	4.66	2145.6	93	2.2	98	73	160	337	26.75
1201	PDF	1.9	1.9	1366.8	59	22	63	67	322	260	3.2
1202	PDF	2.5	2.5	2466.8	86	14.5	95	73	350	277	10.6
1203	PDF	3.77	3.77	1440.2	97	36.3	68	66	572	400	65
1204	PDF	3.5	3.5	4520.7	70	5.9	96	73	572	295	15
1205	PDF	7.5	7.5	2233.7	81	20	84	85	192	275	29
1206	PDF	9.5	9.5	2180.1	85	4.3	89	60	351	235	98
1207	PDF	8.6	8.6	2080.1	78	4.5	90	60	350	227	88.5
1208	PDF	7.5	7.5	2233.7	81	6.9	95	74	392	337	9.75
1209	PDF	6.91	6.91	2333.7	81	23	86	84	191.5	266	29
1210	PDF	9.5	9.5	2266.5	79	15.6	96	74	355	245	7.8
1211	PDF	5.5	5.5	2633.7	81	1.6	63	75	349	260	3.2
1212	PDF	6.5	6.5	2466.8	83	0.5	86	72	349	266	29
1213	PDF	6.5	6.5	2433.7	83	4.4	95	58	190	290	8.6
1214	PDF	7.91	7.91	2333.7	81	23	86	84	191.5	266	29
1215	PDF	8.5	8.5	2890.4	86	14.5	95	73	350	277	10.6
1216	PDF	6.91	6.91	2266.5	86	3.3	87	53	340	230	96.78
1217	PDF	8.5	8.5	2145.6	74	14.5	95	73	350	277	10.6
1218	PDF	4.45	4.45	2380.1	89	18.6	98	78	406	277	8.2
1219	PDF	5.66	5.66	1670	83	22.5	93	78	359	266	9.7
1220	PDF	2.55	2.55	420	85	4.3	89	60	351	235	98
1221	PDF	1.9	1.9	1020.4	86	1.2	95	73	420	210	1.66
1222	PDF	5.66	5.66	3740.3	86	9.4	91	82	372	480	10.6
1223	PDF	6.21	6.21	2633.7	89	3	73	72	345	360	29
1224	PDF	3.21	3.21	2740.6	89	21	98	86	351	195	2.5
1225	PDF	4.66	4.66	2145.6	93	2.2	98	73	160	337	26.75
1226	PDF	4.02	4.02	1366.8	59	22	63	67	322	260	3.2
1227	PDF	3.09	3.09	2466.8	86	14.5	95	73	350	277	10.6
1228	PDF	5.91	5.91	1440.2	97	36.3	68	66	572	400	65
1229	PDF	4.6	4.6	4520.7	70	5.9	96	73	572	295	15
1230	PDF	5.6	5.6	2233.7	81	20	84	85	192	275	29
1231	PDF	4.11	4.11	2180.1	85	4.3	89	60	351	235	98
1232	PDF	645	0.629883	2080.1	78	4.5	90	60	350	227	88.5
1233	PDF	3.44	3.44	2233.7	81	6.9	95	74	392	337	9.75
1234	PDF	2.55	2.55	2145.6	93	4.4	98	73	160	250	26.75
1235	PDF	4.66	4.66	2466.8	86	14.5	95	73	350	277	10.6
1236	PDF	1.9	1.9	2140.3	61	20.3	62	67	320	250	2
1237	PDF	2.5	2.5	2280.1	86	3.3	87	53	340	230	96.78
1238	PDF	2.77	2.77	2366.8	83	13.5	94	71	345	258	9.6
1239	PDF	1.5	1.5	2322.4	91	8	89	72	238	183	190
1240	PDF	5.5	5.5	2890.4	79	2.2	91	55	224	295	110.4
1241	PDF	5.5	5.5	2333.7	81	23	86	84	191.5	266	29
1242	PDF	3.6	3.6	2145.6	93	4.4	98	73	160	250	26.75
1243	PDF	6.8	6.8	3020.4	86	1.2	95	73	420	210	1.66
1244	PDF	1.2	1.2	2466.8	86	14.5	95	85	350	277	10.6
1245	PDF	2.8	2.8	2280.1	86	3.3	87	53	340	230	96.78
1246	PDF	4.4	4.4	2750.6	85	18.6	98	78	406	277	8.2
1247	PDF	677	0.661133	2266.5	79	15.6	96	74	355	245	7.8
1248	PDF	5.33	5.33	2321.4	89	7.1	90	73	240	180	187.75
1249	PDF	1.88	1.88	2890.4	84	1.4	88	58	230	289	115
1250	PDF	780	0.761719	2233.7	81	20	84	85	192	275	29
1251	PDF	6.22	6.22	2045.6	91	5.9	97	79	165	245	28.2
1252	PDF	4.45	4.45	2900.4	83	3.2	97	81	429	195	3.6
1253	PDF	3.22	3.22	2366.8	83	22.5	93	78	359	266	9.7
1254	PDF	4.66	4.66	2140.1	59	21	63	66	322	260	2.5
1255	PDF	950	0.927734	2180.1	85	4.3	89	60	351	235	98
1256	PDF	3.21	3.21	2740.6	80	17.2	95	72	402	272	6.3
1257	PDF	2.88	2.88	22366.8	59	22	63	67	322	260	3.2
1258	PDF	2.11	2.11	2122.4	66	27	66	70	330	266	4.2
1259	PDF	645	0.629883	2890.4	79	2.2	91	55	224	295	110.4
1260	PDF	3.44	3.44	2333.7	81	23	86	84	191.5	266	29
1261	PDF	2.55	2.55	2145.6	93	4.4	98	73	160	250	26.75
1262	PDF	4.66	4.66	3020.4	86	1.2	95	73	420	210	1.66
1263	PDF	1.9	1.9	2466.8	86	14.5	95	73	350	277	10.6
1264	PDF	2.5	2.5	2140.3	61	20.3	62	67	322	255	1.75
1265	PDF	3.77	3.77	3690.2	95	3.6	95	78	450	390	15
1266	PDF	3.5	3.5	2080.1	78	4.5	90	60	350	227	88.5
1267	PDF	2.5	2.5	2650.6	81	21	97	82	520	280	12.2
1268	PDF	9.5	9.5	2166.5	78	17	95	78	360	240	8.9
1269	PDF	8.6	8.6	2070.3	80	20	96	81	355	233	9
1270	PDF	7.5	7.5	2550.6	77	8.1	87	74	350	402	16
1271	PDF	1.6	1.6	2080.1	92	9.3	81	81	340	245	8.6
1272	PDF	2.5	2.5	2166.5	91	9.6	84	75	345	480	29.2
1273	PDF	4.5	4.5	2266.5	81	12	72	79	452	255	29
1274	PDF	5.6	5.6	5800.6	69	13.5	76	68	440	280	17
1275	PDF	7.22	7.22	2140.3	93	17	75	81	652	277	26.75
1276	PDF	3.5	3.5	2650.6	40	7	78	88	224	355	31
1277	PDF	6.5	6.5	3200.3	61	9.3	67	83	390	266	7.8
1278	PDF	4.66	4.66	5500.1	78	7.4	88	77	360	466	30.84
1279	PDF	7.66	7.66	2333.7	78	7	70	73	570	466	31
1280	PDF	6.6	6.6	3740.3	86	9.4	91	82	372	480	10.6
1281	PDF	5.5	5.5	5800.6	73	2.9	80	65	160	480	2
1282	PDF	3.5	3.5	5500.1	86	17.2	90	55	350	466	190
1283	PDF	6.5	6.5	6100.6	94	8.1	83	59	320	270	8.6
1284	PDF	1.5	1.5	2145.6	95	1.5	91	85	340	470	29.2
1285	PDF	9.5	9.5	6540.2	86	16	71	74	400	180	110.4
1286	PDF	8.5	8.5	2633.7	89	3	73	72	345	360	29
1287	PDF	7.5	7.5	4700.4	83	2.2	80	75	238	340	87.75
1288	PDF	6.27	6.27	3100.4	92	2.7	89	73	370	300	1.67
1289	PDF	7.66	7.66	6750.4	86	4.4	91	71	160	270	13.25
1290	PDF	5.5	5.5	4600.4	94	1.2	72	73	420	250	8.66
1291	PDF	4.91	4.91	6232.6	61	14.5	75	60	350	510	6.4
1292	PDF	8.5	8.5	3744.8	95	6.9	62	73	430	380	1
1293	PDF	1.02	1.02	6540.2	89	36.3	87	73	470	210	15
1294	PDF	805	0.786133	4520.7	83	20.3	96	67	320	277	96.78
1295	PDF	2.54	2.54	3740.3	91	3.6	94	73	450	240	8.2
1296	PDF	377	0.368164	2466.8	84	21	82	78	400	420	187.75
1297	PDF	1.65	1.65	3180.2	83	17	94	53	345	250	96.78
1298	PDF	3.55	3.55	5800.6	92	6.9	87.5	78	238	390	5.8
1299	PDF	677	0.661133	2140.3	91	1.7	86	73	392	270	190
1300	PDF	4.33	4.33	2322.4	91	20.3	89	72	238	210	190
1301	PDF	1.88	1.88	2890.4	79	2.2	91	55	224	227	110.4
1302	PDF	780	0.761719	2333.7	81	23	86	84	191.5	280	29
1303	PDF	6.22	6.22	2145.6	93	4.4	98	73	160	250	26.75
1304	PDF	4.45	4.45	3020.4	86	1.2	95	73	420	210	1.66
1305	PDF	3.22	3.22	2466.8	86	14.5	95	73	350	277	10.6
1306	PDF	5.66	5.66	2280.1	86	3.3	87	53	340	230	96.78
1307	PDF	950	0.927734	2750.6	85	18.6	98	78	406	277	8.2
1308	PDF	7.21	7.21	2266.5	79	15.6	96	74	355	245	7.8
1309	PDF	2.88	2.88	2321.4	89	7.1	90	73	240	180	187.75
1310	PDF	4.11	4.11	2890.4	84	1.4	88	58	230	289	115
1311	PDF	645	0.629883	2233.7	81	20	84	85	192	275	29
1312	PDF	3.44	3.44	2045.6	91	5.9	97	79	165	245	28.2
1313	PDF	2.55	2.55	2900.4	83	3.2	97	81	429	195	3.6
1314	PDF	4.66	4.66	2366.8	83	22.5	93	78	359	266	9.7
1315	PDF	1.9	1.9	2140.1	59	21	63	66	322	260	2.5
1316	PDF	2.5	2.5	2180.1	85	4.3	89	60	351	235	98
1317	PDF	3.77	3.77	2740.6	80	17.2	95	72	402	272	6.3
1318	PDF	3.5	3.5	22366.8	59	22	63	67	322	260	3.2
1319	PDF	7.5	7.5	2122.4	66	27	66	70	330	266	4.2
1320	PDF	8.3	8.3	2890.4	79	2.2	91	55	224	295	110.4
1321	PDF	4.22	4.22	2333.7	81	23	86	84	191.5	266	29
1322	PDF	3.6	3.6	2145.6	93	4.4	98	73	160	250	26.75
1323	PDF	4.66	4.66	3020.4	86	1.2	95	73	420	210	1.66
1324	PDF	5.66	5.66	2466.8	86	14.5	95	73	350	277	10.6
1325	PDF	3.91	3.91	2140.3	61	20.3	62	67	322	255	1.75
1326	PDF	4.6	4.6	3690.2	95	3.6	95	78	450	390	15
1327	PDF	5.6	5.6	2080.1	78	4.5	90	60	350	227	88.5
1328	PDF	4.11	4.11	2650.6	81	21	97	82	520	280	12.2
1329	PDF	645	0.629883	2166.5	78	17	95	78	360	240	8.9
1330	PDF	3.44	3.44	2166.5	75	16	93	75	650	233	7.8
1331	PDF	2.55	2.55	2650.6	81	21	97	82	520	280	12.2
1332	PDF	4.66	4.66	4520.7	86	6.9	78	67	340	250	16.9
1333	PDF	1.9	1.9	3740.3	86	1.4	97	73	400	266	9.75
1334	PDF	2.5	2.5	3020.4	97	36.3	70	67	345	288	64
1335	PDF	3.77	3.77	2466.8	96	20.3	45	78	238	240	8.6
1336	PDF	3.5	3.5	3180.2	94	3.6	95	53	452	255	14
1337	PDF	7.5	7.5	5800.6	61	3.3	97	78	530	268	29.2
1338	PDF	9.5	9.5	2280.1	83	1.9	97	76	640	420	17
1339	PDF	8.6	8.6	2840.6	91	8.1	63	74	320	250	40.84
1340	PDF	7.5	7.5	3745.2	92	3	63	58	430	245	83.5
1341	PDF	1	1	3180.2	81	2.2	66	85	580	180	1.66
1342	PDF	4	4	5800.6	91	23	82	75	470	277	10.6
1343	PDF	3	3	2321.4	67	6.9	86	81	452	492	8.2
1344	PDF	2.8	2.8	4134.5	40	1.2	95	78	392	399	7.8
1345	PDF	6.4	6.4	6440.2	97	36.3	68	66	572	400	65
1346	PDF	2.5	2.5	3590.2	81	16.4	95	72	372	210	28.2
1347	PDF	3.77	3.77	2180.1	85	2.1	90	75	420	277	6.5
1348	PDF	3.5	3.5	4034.5	90	20	90	73	470	348	8.66
1349	PDF	7.5	7.5	3100.4	84	12	81	71	320	290	6.4
1350	PDF	9.5	9.5	2145.6	81	5.1	95	73	349	480	1
1351	PDF	8.6	8.6	6540.2	79	3.6	86	73	652	390	2
1352	PDF	7.5	7.5	4520.7	70	5.9	96	73	572	295	15
1353	PDF	1	1	3740.3	71	1.2	84	73	224	266	96.78
1354	PDF	4.11	4.11	5800.6	91.5	22.5	95	73	370	250	16.9
1355	PDF	645	0.629883	2750.6	91	16.1	40	60	420	180	29.2
1356	PDF	3.44	3.44	2321.4	94	14.3	95	79	430	490	29
1357	PDF	2.55	2.55	3745.2	80	1.2	99	53	475	300	17
1358	PDF	4.66	4.66	3050.4	66	10.1	98	73	450	400	26.75
1359	PDF	1.9	1.9	5600.1	84	2.7	95	66	520	230	13.25
1360	PDF	2.5	2.5	2233.7	92	0.5	96	71	640	510	1.67
1361	PDF	3.77	3.77	3640.3	73	36.3	86	73	470	420	1
1362	PDF	3.5	3.5	2366.8	67	3.6	91	78	450	390	15
1363	PDF	7.5	7.5	2280.1	40	3.3	86	53	340	230	96.78
1364	PDF	8.3	8.3	2840.6	92	15.7	95	73	400	270	5.8
1365	PDF	4.22	4.22	2366.8	86	13.5	78	71	345	258	9.6
1366	PDF	3.6	3.6	2322.4	86	8	89	72	238	183	190
1367	PDF	4.66	4.66	2890.4	81	2.2	91	55	224	295	110.4
1368	PDF	5.66	5.66	2333.7	78	23	86	84	191.5	266	29
1369	PDF	3.91	3.91	2145.6	93	4.4	98	88	160	250	26.75
1370	PDF	4.6	4.6	3020.4	86	1.2	95	73	420	210	1.66
1371	PDF	6.5	6.5	2466.8	86	14.5	95	88	350	277	10.6
1372	PDF	4.66	4.66	3690.2	95	3.6	95	78	450	390	15
1373	PDF	7.66	7.66	2280.1	86	3.3	87	53	340	230	96.78
1374	PDF	6.6	6.6	2750.6	85	18.6	98	78	406	277	8.2
1375	PDF	5.5	5.5	2266.5	79	15.6	96	74	355	245	7.8
1376	PDF	3.5	3.5	2321.4	89	7.1	90	73	240	180	187.75
1377	PDF	6.5	6.5	2890.4	84	1.4	88	58	230	289	115
1378	PDF	1.5	1.5	2233.7	81	20	84	85	192	275	29
1379	PDF	9.5	9.5	2045.6	91	5.9	97	79	165	245	28.2
1380	PDF	6.5	6.5	2900.4	83	3.2	97	81	429	195	3.6
1381	PDF	5.5	5.5	2366.8	83	22.5	93	78	359	266	9.7
1382	PDF	6.27	6.27	3590.2	94	4.2	96	80	451	401	14
1383	PDF	7.66	7.66	2180.1	85	4.3	89	60	351	235	98
1384	PDF	3.5	3.5	2740.6	80	17.2	95	72	402	272	6.3
1385	PDF	4.91	4.91	22366.8	59	22	63	67	322	260	3.2
1386	PDF	8.5	8.5	2122.4	66	27	66	70	330	266	4.2
1387	PDF	1.02	1.02	2890.4	79	2.2	91	55	224	295	110.4
1388	PDF	805	0.786133	2333.7	81	23	86	84	191.5	266	29
1389	PDF	2.54	2.54	3020.4	86	1.2	95	73	420	210	1.66
1390	PDF	377	0.368164	2466.8	86	14.5	95	73	350	277	10.6
1391	PDF	1.65	1.65	3180.2	97	6.9	99	73	430	240	8.66
1392	PDF	3.55	3.55	2140.3	61	20.3	62	67	322	255	1.75
1393	PDF	677	0.661133	3690.2	95	3.6	95	78	450	390	15
1394	PDF	4.33	4.33	2080.1	78	4.5	90	60	350	227	88.5
1395	PDF	1.88	1.88	2650.6	81	21	97	82	520	280	12.2
1396	PDF	780	0.761719	2166.5	78	17	95	78	360	240	8.9
1397	PDF	6.22	6.22	2890.4	92	14.5	62	70	452	355	16.9
1398	PDF	4.45	4.45	2233.7	81	6.9	95	74	392	337	9.75
1399	PDF	3.22	3.22	6440.2	69	16	83	55	224	295	110.4
1400	PDF	5.66	5.66	2900.4	67	23	97	71	623	466	17
1401	PDF	950	0.927734	2322.4	97	0.5	96	73	640	510	1.67
1402	PDF	7.21	7.21	3745.2	94	10.1	78	60	372	230	83.5
1403	PDF	2.88	2.88	3200.3	95	7.1	70	73	350	277	10.6
1404	PDF	950	0.927734	5500.1	81	7.7	95	67	580	480	6.4
1405	PDF	7.21	7.21	2333.7	97	1.6	93	80	440	348	64
1406	PDF	2.88	2.88	3744.8	83	4.4	89	73	530	400	87.75
1407	PDF	4.11	4.11	6540.2	94	2.7	95	71	623	466	17
1408	PDF	645	0.629883	4600.4	72	6.9	94	73	350	277	10.6
1409	PDF	3.44	3.44	4334.5	40	0.5	97	67	320	250	1.98
1410	PDF	2.55	2.55	4145.2	92	3.3	91	78	450	390	15
1411	PDF	4.66	4.66	5900.1	96	6.9	74	73	240	180	187.75
1412	PDF	1.9	1.9	3190.4	94	1.4	98	68	453	357	17
1413	PDF	2.5	2.5	2633.7	61	36.3	78	76	389	338	11.2
1414	PDF	7.5	7.5	4700.4	95	20.3	74	74	440	340	65
1415	PDF	1	1	6332.6	86	3.6	98	66	358	295	8.1
1416	PDF	4.11	4.11	3944.8	89	4.5	68	69	653	492	17
1417	PDF	645	0.629883	4720.7	81	1.7	95	85	192	275	29
1418	PDF	3.44	3.44	5600.1	84	1.2	88	73	350	277	10.6
1419	PDF	2.55	2.55	4420.7	91.5	19.7	86	83	190	270	31
1420	PDF	4.66	4.66	3180.2	93	4.4	86	74	160	250	26.75
1421	PDF	1.9	1.9	2466.8	86	14.5	63	66	322	260	2.5
1422	PDF	2.5	2.5	2140.3	61	20.3	62	67	320	250	2
1423	PDF	3.77	3.77	2280.1	86	3.3	87	53	340	230	96.78
1424	PDF	3.5	3.5	2366.8	83	13.5	94	71	345	258	9.6
1425	PDF	7.5	7.5	2322.4	91	8	89	72	238	183	190
1426	PDF	8.3	8.3	2890.4	79	2.2	91	55	224	295	110.4
1427	PDF	4.22	4.22	2333.7	81	23	86	84	191.5	266	29
1428	PDF	3.6	3.6	2145.6	93	4.4	98	75	160	250	26.75
1429	PDF	4.66	4.66	3020.4	86	1.2	95	66	420	210	1.66
1430	PDF	5.66	5.66	2466.8	86	14.5	95	88	350	277	10.6
1431	PDF	3.91	3.91	2280.1	86	3.3	87	53	340	230	96.78
1432	PDF	4.6	4.6	2750.6	85	18.6	98	78	406	277	8.2
1433	PDF	5.5	5.5	2266.5	79	15.6	96	74	355	245	7.8
1434	PDF	3.5	3.5	2321.4	89	7.1	90	73	240	180	187.75
1435	PDF	6.5	6.5	2890.4	84	1.4	88	58	230	289	115
1436	PDF	1.5	1.5	2233.7	81	20	84	85	192	275	29
1437	PDF	4.5	4.5	2045.6	91	5.9	97	79	165	245	28.2
1438	PDF	8.5	8.5	2900.4	83	3.2	97	81	429	195	3.6
1439	PDF	7.5	7.5	2366.8	83	22.5	93	78	359	266	9.7
1440	PDF	6.27	6.27	2140.1	59	21	63	66	322	260	2.5
1441	PDF	7.66	7.66	2180.1	85	4.3	89	60	351	235	98
1442	PDF	4.5	4.5	2740.6	80	17.2	95	72	402	272	6.3
1443	PDF	3.91	3.91	22366.8	59	22	63	67	322	260	3.2
1444	PDF	8.5	8.5	2122.4	66	27	66	70	330	266	4.2
1445	PDF	1.02	1.02	2890.4	79	2.2	91	55	224	295	110.4
1446	PDF	805	0.786133	2333.7	81	23	86	84	191.5	266	29
1447	PDF	2.54	2.54	2145.6	93	4.4	98	88	160	250	26.75
1448	PDF	377	0.368164	3020.4	86	1.2	95	73	420	210	1.66
1449	PDF	1.65	1.65	2466.8	86	14.5	95	73	350	277	10.6
1450	PDF	3.55	3.55	2140.3	61	20.3	62	67	322	255	1.75
1451	PDF	677	0.661133	3690.2	95	3.6	95	78	450	390	15
1452	PDF	7.91	7.91	2080.1	78	4.5	90	60	350	227	88.5
1453	PDF	8.5	8.5	2650.6	81	21	97	82	520	280	12.2
1454	PDF	6.91	6.91	2166.5	78	17	95	78	360	240	8.9
1455	PDF	8.5	8.5	5900.1	90	7.7	89	60	392	235	98
1456	PDF	4.45	4.45	3190.4	84	16.1	95	88	440	272	6.3
1457	PDF	5.66	5.66	2633.7	81	1.6	63	75	349	260	3.2
1458	PDF	2.55	2.55	4700.4	79	14.3	66	73	450	266	4.2
1459	PDF	1.9	1.9	3940.3	91.5	2.7	97	73	392	390	29.2
1460	PDF	7.66	7.66	2466.8	83	0.5	86	72	349	266	29
1461	PDF	6.21	6.21	2280.1	59	14.5	98	72	436	250	26.75
1462	PDF	5.21	5.21	3744.8	86	1.4	62	68	160	255	1.75
1463	PDF	4.66	4.66	5500.1	83	20.3	90	60	320	227	88.5
1464	PDF	6.02	6.02	2333.7	86	3.3	95	88	420	240	8.9
1465	PDF	4.09	4.09	4600.4	83	15.7	99	55	350	240	8.66
1466	PDF	5.91	5.91	3745.2	72	8	81	73	392	360	18.21
1467	PDF	4.6	4.6	4334.5	93	8.1	86	78	349	350	67
1468	PDF	5.6	5.6	4145.2	67	17	96	53	652	300	7.8
1469	PDF	4.11	4.11	4224.6	40	1.5	84	78	572	490	16
1470	PDF	645	0.629883	3200.4	92	3.6	98	74	224	410	30.84
1471	PDF	3.44	3.44	3944.8	95	17	88	67	160	180	187.75
1472	PDF	2.55	2.55	2345.6	86	1.5	84	78	640	480	6.4
1473	PDF	4.66	4.66	4720.7	83	1.7	74	78	372	255	1.75
1474	PDF	1.9	1.9	4124.6	83	14.3	45	76	580	277	8.2
1475	PDF	2.5	2.5	2433.7	83	4.4	95	58	190	290	8.6
1476	PDF	2.77	2.77	2145.6	93	4.4	98	75	160	266	29
1477	PDF	1.5	1.5	2466.8	86	14.5	95	81	350	277	10.6
1478	PDF	5.5	5.5	2140.3	61	20.3	62	67	320	250	2
1479	PDF	5.5	5.5	2280.1	86	3.3	87	53	340	230	96.78
1480	PDF	3.6	3.6	2366.8	83	13.5	94	71	345	258	9.6
1481	PDF	6.8	6.8	2322.4	91	8	89	72	238	183	190
1482	PDF	1.2	1.2	2890.4	79	2.2	91	55	224	295	110.4
1483	PDF	2.8	2.8	2333.7	81	23	86	84	191.5	266	29
1484	PDF	4.4	4.4	2145.6	93	4.4	98	84	160	250	26.75
1485	PDF	3.5	3.5	3020.4	86	1.2	95	73	420	210	1.66
1486	PDF	2.91	2.91	2466.8	86	14.5	95	66	350	277	10.6
1487	PDF	7.5	7.5	2280.1	86	3.3	87	53	340	230	96.78
1488	PDF	2.02	2.02	2750.6	85	18.6	98	78	406	277	8.2
1489	PDF	805	0.786133	2266.5	79	15.6	96	74	355	245	7.8
1490	PDF	1.54	1.54	2321.4	89	7.1	90	73	240	180	187.75
1491	PDF	377	0.368164	2890.4	84	1.4	88	58	230	289	115
1492	PDF	2.65	2.65	2233.7	81	20	84	85	192	275	29
1493	PDF	3.55	3.55	2045.6	91	5.9	97	79	165	245	28.2
1494	PDF	677	0.661133	2900.4	83	3.2	97	81	429	195	3.6
1495	PDF	7.91	7.91	2366.8	83	22.5	93	78	359	266	9.7
1496	PDF	8.5	8.5	380.7	56	5	58	73	75	70	121.46
1497	PDF	6.91	6.91	1350	91	12.4	97	67	78	105	20.8
1498	PDF	3.5	3.5	890.5	100	8.3	100	73	170	130	89
1499	PDF	4.45	4.45	440.7	36	0.9	37	60	97	74	15.91
2228	WORD	122	0.119141	126.17	98	12	100	67	80	70	22.77
2229	EXCEL	120	0.117188	107	87	1.9	95	73	75	65	58.33
2230	WORD	156	0.152344	140.2	91	15.3	97	67	88	90	0.93
2231	EXCEL	140	0.136719	120	96	13.5	99	67	74	150	41.66
2232	WORD	88	0.0859375	95.4	86	6	86	73	66	60	1.5
2233	EXCEL	142	0.138672	133.2	80	2.3	80	53	83	153	6.5
2234	WORD	96	0.09375	99.3	72	13.3	72	73	72	63	4
2235	EXCEL	148	0.144531	154.9	71	3	72	83	94	155	744
2236	WORD	250	0.244141	370.1	83	15.2	84	83	68	65	3
2237	EXCEL	115	0.112305	102.7	46	3.8	47	78	75	67	4.83
2238	WORD	1.5	1.5	760.7	91	7.9	97	73	149	115	9.2
2239	EXCEL	156	0.152344	170.5	77	8.8	78	67	100	160	3.95
2240	WORD	117	0.114258	115.9	18	4.3	18	60	75	70	5.15
2241	EXCEL	166	0.162109	184.3	90	16.2	96	73	115	157	24.13
2242	WORD	163	0.15918	149.6	88	1.7	96	53	90	150	43.25
2243	EXCEL	174	0.169922	198.6	19	4.4	20	60	130	79	5.91
2244	WORD	112	0.109375	114.9	88	21.2	96	73	74	69	23
2245	EXCEL	117	0.114258	110.4	77	4.7	78	73	72	65	269.25
2246	WORD	2.66	2.66	1100.7	71	8.4	72	73	185	110	6
2247	EXCEL	240	0.234375	515.2	86	9.2	95	73	69	220	8.8
2248	WORD	350	0.341797	420.3	72	12.9	72	83	55	82	4.5
2249	EXCEL	320	0.3125	750.8	100	12.1	100	80	166	92	1
2250	WORD	66	0.0644531	88.4	98	1.2	100	73	45	50	8.2
2251	EXCEL	350	0.341797	820.4	100	1.4	100	67	130	95	42.6
2252	WORD	750	0.732422	650.8	85	1.1	95	60	140	96	47
2253	EXCEL	66	0.0644531	98.3	87	2.6	95	60	145	63	26
2254	WORD	44	0.0429688	48.5	99	1.5	100	67	45	44	35.2
2255	EXCEL	125	0.12207	110.5	63	7.8	63	73	70	60	14.66
2256	WORD	75	0.0732422	90.6	91	15.9	97	73	135	61	5.4
2257	EXCEL	88	0.0859375	103.6	63	2.7	64	67	144	63	152
2258	WORD	110	0.107422	118.9	71	2.1	71	73	160	66	2.37
2259	EXCEL	78	0.0761719	99.3	91	4.8	91	60	140	65	31.17
2260	WORD	55	0.0537109	56.4	43	4.4	43	73	95	41	14.85
2261	WORD	1.2	1.2	820	83	1.3	94	62	139	95	48
2262	EXCEL	90	0.0878906	105	65	3.2	66	65	150	64	152
2263	WORD	1.5	1.5	2333.7	81	23	86	84	191.5	266	29
2264	WORD	4.5	4.5	2266.5	79	15.6	96	74	355	245	7.8
2265	EXCEL	3.91	3.91	2321.4	89	7.1	90	73	240	180	187.75
2266	WORD	5.5	5.5	800.6	96	1.4	99	67	580	480	6.4
2267	WORD	1.08	1.08	1024.6	83	17	87.5	80	440	348	64
2268	EXCEL	2.22	2.22	2345.6	93	4.4	98	73	160	250	26.75
2269	WORD	3.22	3.22	2145.6	91	5.9	97	79	165	245	28.2
2270	WORD	4.5	4.5	2433.7	81	23	86	84	191.5	266	29
2271	EXCEL	3.27	3.27	2245.6	93	4.4	98	73	160	250	26.75
2272	WORD	2.22	2.22	2345.6	93	4.4	98	73	160	250	26.75
2273	WORD	3.22	3.22	2145.6	93	4.4	98	73	160	250	26.75
2274	EXCEL	4.5	4.5	2333.7	81	23	86	84	191.5	266	29
2275	WORD	3.5	3.5	2333.7	81	23	86	84	191.5	266	29
2276	WORD	4.5	4.5	2166.5	78	17	95	78	360	240	8.9
2277	EXCEL	5.66	5.66	2650.6	40	7	78	88	224	355	31
2278	WORD	6.5	6.5	1200.3	92	4.4	40	75	370	295	87.75
2279	WORD	1.6	1.6	1690.2	84	8.1	88	71	440	245	17
2280	EXCEL	2.5	2.5	2050.4	91.5	12	45	75	380	295	86.9
2281	WORD	4.6	4.6	2466.8	86	14.5	95	73	350	277	10.6
2282	WORD	5.5	5.5	266.5	79	15.6	96	74	355	245	7.8
2283	EXCEL	6.91	6.91	2321.4	89	7.1	90	73	240	180	187.75
2284	WORD	7.44	7.44	2166.5	75	16	93	75	650	233	7.8
2285	WORD	1.6	1.6	2840.6	91	8.1	63	74	320	250	40.84
2286	EXCEL	3.91	3.91	1800.6	91	23	82	75	470	277	10.6
2287	WORD	4.53	4.53	3640.3	73	36.3	86	73	470	420	1
2288	WORD	5.91	5.91	2322.4	86	8	89	72	238	183	190
2289	EXCEL	1.5	1.5	2333.7	78	23	86	84	191.5	266	29
2290	WORD	2.5	2.5	2333.7	81	23	86	84	191.5	266	29
2291	WORD	4.5	4.5	2333.7	81	23	86	84	191.5	266	29
2292	EXCEL	5.6	5.6	2466.8	86	14.5	95	73	350	277	10.6
2293	WORD	6.6	6.6	4145.2	92	3.3	91	78	450	390	15
2294	WORD	5.5	5.5	4720.7	81	1.7	95	85	192	275	29
2295	EXCEL	3.5	3.5	4420.7	91.5	19.7	86	83	190	270	31
2296	WORD	4.5	4.5	2233.7	81	20	84	85	192	275	29
2297	WORD	2.5	2.5	1333.7	81	23	86	84	191.5	266	29
2298	EXCEL	3.6	3.6	2466.8	86	14.5	95	73	350	277	10.6
2299	WORD	7.53	7.53	2744.8	86	1.4	62	68	160	255	1.75
2300	WORD	7.5	7.5	2345.6	86	1.5	84	78	640	480	6.4
2301	EXCEL	1.5	1.5	720.7	83	1.7	74	78	372	255	1.75
2302	WORD	2.5	2.5	266.5	79	15.6	96	74	355	245	7.8
2303	WORD	3.5	3.5	2233.7	81	20	84	85	192	275	29
2304	EXCEL	2.91	2.91	800.6	91	35	81	77	470	277	15
2305	WORD	7.22	7.22	2145.6	93	4.4	98	75	160	266	29
2306	WORD	2.66	2.66	2280.1	86	3.3	87	53	340	230	96.78
2307	EXCEL	1.5	1.5	2333.7	81	23	86	84	191.5	266	29
2308	WORD	4.5	4.5	2233.7	81	20	84	85	192	275	29
2309	WORD	1.5	1.5	266.5	80	17	94	74	355	245	7.8
2310	EXCEL	3.91	3.91	321.4	89	9	91	75	265	190	190
2311	WORD	12.2	12.2	3020.4	86	1.2	95	73	420	210	1.66
2312	WORD	7.66	7.66	2280.1	86	3.3	87	53	340	230	96.78
2313	EXCEL	3.66	3.66	2750.6	85	18.6	98	78	406	277	8.2
2314	WORD	5.2	5.2	1900.4	83	3.2	97	81	429	195	3.6
2315	WORD	2.5	2.5	845.6	86	2.9	84	78	640	480	8
2316	EXCEL	1.5	1.5	720.7	85	3.2	76	78	372	255	3.5
2317	WORD	7.21	7.21	2300.1	23	1.8	24	42	350	260	334.1
2318	WORD	4.11	4.11	1460.3	88	7.1	96	73	220	135	13.67
2319	EXCEL	645	0.629883	377.3	83	22.3	84	83	50	80	4
2320	WORD	3.77	3.77	1310.7	97	24.7	99	73	230	127	8.8
2321	WORD	3.5	3.5	845.6	86	2.9	84	78	640	480	8
2322	EXCEL	1.55	1.55	720.7	85	3.2	76	78	372	255	3.5
2323	WORD	7.5	7.5	2333.7	81	23	86	84	191.5	266	29
2324	WORD	4.2	4.2	3020.4	86	1.2	95	73	420	210	1.66
2325	EXCEL	1.6	1.6	2466.8	86	14.5	95	73	350	277	10.6
2326	WORD	4.5	4.5	2750.6	85	18.6	98	78	406	277	8.2
2327	WORD	2.5	2.5	2750.6	85	18.6	98	78	406	277	8.2
2328	EXCEL	3.7	3.7	4600.4	86	10.1	95	73	530	400	87.75
2329	WORD	4.5	4.5	845.6	86	2.9	84	78	640	480	8
2330	WORD	5.6	5.6	1200.4	79	2.5	92	83	429	195	4.2
2331	EXCEL	3.66	3.66	2750.6	85	18.6	98	78	406	277	8.2
2332	WORD	2.5	2.5	440.7	36	0.9	37	60	97	74	15.91
2333	WORD	4.66	4.66	1400	70	4.8	70	73	220	125	3.63
2334	EXCEL	3.5	3.5	1240	56	7.5	56	67	130	115	88.31
2335	WORD	2.66	2.66	377.3	83	22.3	84	83	50	80	4
2336	WORD	4.21	4.21	1100.8	69	9.7	70	73	195	120	44.75
2337	EXCEL	1.5	1.5	1520.7	85	9.4	95	67	250	135	6.66
2338	WORD	3.5	3.5	2850.6	91	8	89	72	238	183	190
2339	WORD	2.5	2.5	2421.4	81	23	86	84	191.5	266	29
2340	EXCEL	4.22	4.22	1700.1	93	4.4	98	73	160	250	26.75
2341	WORD	1.2	1.2	1222.4	89	7.1	90	73	240	180	187.75
2342	WORD	2.91	2.91	2245.6	81	20	84	85	192	275	29
2343	EXCEL	3.5	3.5	2566.8	91	5.9	97	79	165	245	28.2
2344	WORD	1.5	1.5	460	59	22	63	67	322	260	3.2
2345	WORD	4.2	4.2	1080	79	2.2	91	55	224	295	110.4
2346	EXCEL	5.5	5.5	1090	81	23	86	84	191.5	266	29
2347	WORD	3.66	3.66	433.7	126.17	98	12	100	67	80	70
2348	WORD	4.66	4.66	2466.8	107	87	1.9	95	73	75	65
2349	EXCEL	3.5	3.5	2266.5	140.2	91	15.3	97	67	88	90
2350	WORD	4.2	4.2	3740.3	120	96	13.5	99	67	74	150
2351	WORD	3.66	3.66	2740.6	95.4	86	6	86	73	66	60
2352	EXCEL	5.2	5.2	2145.6	133.2	80	2.3	80	53	83	153
2353	WORD	3.77	3.77	99.3	99.3	72	13.3	72	73	72	63
2354	WORD	1.55	1.55	56.4	154.9	71	3	72	83	94	155
2355	EXCEL	7.5	7.5	820	370.1	83	15.2	84	83	68	65
2356	WORD	240	0.234375	105	102.7	46	3.8	47	78	75	67
2357	WORD	320	0.3125	2333.7	760.7	91	7.9	97	73	149	115
2358	EXCEL	66	0.0644531	2266.5	170.5	77	8.8	78	67	100	160
2359	WORD	75	0.0732422	2321.4	115.9	18	4.3	18	60	75	70
2360	WORD	110	0.107422	800.6	184.3	90	16.2	96	73	115	157
2361	EXCEL	78	0.0761719	1024.6	149.6	88	1.7	96	53	90	150
2362	WORD	6.91	6.91	2345.6	198.6	19	4.4	20	60	130	79
2363	WORD	9.08	9.08	2145.6	114.9	88	21.2	96	73	74	69
2364	EXCEL	9.22	9.22	2433.7	110.4	77	4.7	78	73	72	65
2365	WORD	8.5	8.5	2245.6	1100.7	71	8.4	72	73	185	110
2366	WORD	4.5	4.5	2345.6	515.2	86	9.2	95	73	69	220
2367	EXCEL	7.66	7.66	2145.6	420.3	72	12.9	72	83	55	82
2368	WORD	8.5	8.5	2333.7	750.8	100	12.1	100	80	166	92
2369	WORD	7.44	7.44	2333.7	88.4	98	1.2	100	73	45	50
2370	EXCEL	9.6	9.6	2166.5	820.4	100	1.4	100	67	130	95
2371	WORD	4.5	4.5	2650.6	650.8	85	1.1	95	60	140	96
2372	WORD	6.6	6.6	1200.3	98.3	87	2.6	95	60	145	63
2373	EXCEL	5.5	5.5	1690.2	48.5	99	1.5	100	67	45	44
2374	WORD	7.5	7.5	133.2	110.5	63	7.8	63	73	70	60
2375	WORD	2.5	2.5	99.3	90.6	91	15.9	97	73	135	61
2376	EXCEL	3.5	3.5	154.9	103.6	63	2.7	64	67	144	63
2377	WORD	1.5	1.5	370.1	118.9	71	2.1	71	73	160	66
2378	WORD	12.2	12.2	115.9	18	4.3	18	60	75	70	5.15
2379	EXCEL	7.66	7.66	184.3	90	16.2	96	73	115	157	24.13
2380	WORD	1.5	1.5	149.6	88	1.7	96	53	90	150	43.25
2381	WORD	750	0.732422	198.6	19	4.4	20	60	130	79	5.91
2382	EXCEL	320	0.3125	114.9	88	21.2	96	73	74	69	23
2383	WORD	2.1	2.1	110.4	77	4.7	78	73	72	65	269.25
2384	WORD	6.91	6.91	1100.7	71	8.4	72	73	185	110	6
2385	EXCEL	9.08	9.08	515.2	86	9.2	95	73	69	220	8.8
2386	WORD	7.44	7.44	420.3	72	12.9	72	83	55	82	4.5
2387	WORD	4.5	4.5	750.8	100	12.1	100	80	166	92	1
2388	EXCEL	6.6	6.6	88.4	98	1.2	100	73	45	50	8.2
2389	WORD	3.5	3.5	820.4	100	1.4	100	67	130	95	42.6
2390	WORD	4.2	4.2	650.8	85	1.1	95	60	140	96	47
2391	EXCEL	5.5	5.5	98.3	87	2.6	95	60	145	63	26
2392	WORD	5.2	5.2	48.5	99	1.5	100	67	45	44	35.2
2393	WORD	1.55	1.55	110.5	63	7.8	63	73	70	60	14.66
2394	EXCEL	7.5	7.5	90.6	91	15.9	97	73	135	61	5.4
2395	WORD	7.66	7.66	103.6	63	2.7	64	67	144	63	152
2396	WORD	5.2	5.2	118.9	71	2.1	71	73	160	66	2.37
2397	EXCEL	2.5	2.5	99.3	91	4.8	91	60	140	65	31.17
2398	WORD	3.5	3.5	56.4	43	4.4	43	73	95	41	14.85
2399	WORD	7.5	7.5	820	83	1.3	94	62	139	95	48
2400	EXCEL	4.2	4.2	105	65	3.2	66	65	150	64	152
2401	WORD	5.6	5.6	2333.7	81	23	86	84	191.5	266	29
2402	WORD	2.5	2.5	2266.5	79	15.6	96	74	355	245	7.8
2403	EXCEL	4.66	4.66	2321.4	89	7.1	90	73	240	180	187.75
2404	WORD	250	0.244141	800.6	96	1.4	99	67	580	480	6.4
2405	WORD	115	0.112305	1024.6	83	17	87.5	80	440	348	64
2406	EXCEL	1.5	1.5	2345.6	93	4.4	98	73	160	250	26.75
2407	WORD	156	0.152344	2145.6	91	5.9	97	79	165	245	28.2
2408	WORD	117	0.114258	2433.7	81	23	86	84	191.5	266	29
2409	EXCEL	166	0.162109	2245.6	93	4.4	98	73	160	250	26.75
2410	WORD	163	0.15918	2345.6	93	4.4	98	73	160	250	26.75
2411	WORD	174	0.169922	2145.6	93	4.4	98	73	160	250	26.75
2412	EXCEL	112	0.109375	2333.7	81	23	86	84	191.5	266	29
2413	WORD	117	0.114258	2333.7	81	23	86	84	191.5	266	29
2414	WORD	2.66	2.66	2166.5	78	17	95	78	360	240	8.9
2415	EXCEL	240	0.234375	2650.6	40	7	78	88	224	355	31
2416	WORD	350	0.341797	1200.3	92	4.4	40	75	370	295	87.75
2417	WORD	320	0.3125	1690.2	84	8.1	88	71	440	245	17
2418	EXCEL	66	0.0644531	2050.4	91.5	12	45	75	380	295	86.9
2419	WORD	350	0.341797	2466.8	86	14.5	95	73	350	277	10.6
2420	WORD	750	0.732422	266.5	79	15.6	96	74	355	245	7.8
2421	EXCEL	66	0.0644531	2321.4	89	7.1	90	73	240	180	187.75
2422	WORD	44	0.0429688	2166.5	75	16	93	75	650	233	7.8
2423	WORD	125	0.12207	2840.6	91	8.1	63	74	320	250	40.84
2424	EXCEL	75	0.0732422	1800.6	91	23	82	75	470	277	10.6
2425	WORD	88	0.0859375	3640.3	73	36.3	86	73	470	420	1
2426	WORD	110	0.107422	2322.4	86	8	89	72	238	183	190
2427	EXCEL	78	0.0761719	2333.7	78	23	86	84	191.5	266	29
2428	WORD	55	0.0537109	2333.7	81	23	86	84	191.5	266	29
2429	WORD	1.2	1.2	2333.7	81	23	86	84	191.5	266	29
2430	EXCEL	90	0.0878906	2466.8	86	14.5	95	73	350	277	10.6
2431	WORD	8.5	8.5	4145.2	92	3.3	91	78	450	390	15
2432	WORD	8.5	8.5	4720.7	81	1.7	95	85	192	275	29
2433	EXCEL	6.91	6.91	4420.7	91.5	19.7	86	83	190	270	31
2434	WORD	9.5	9.5	2233.7	81	20	84	85	192	275	29
2435	WORD	9.08	9.08	1333.7	81	23	86	84	191.5	266	29
2436	EXCEL	2.22	2.22	2466.8	86	14.5	95	73	350	277	10.6
2437	WORD	7.22	7.22	2744.8	86	1.4	62	68	160	255	1.75
2438	WORD	6.5	6.5	2345.6	86	1.5	84	78	640	480	6.4
2439	EXCEL	6.27	6.27	720.7	83	1.7	74	78	372	255	1.75
2440	WORD	4.22	4.22	266.5	79	15.6	96	74	355	245	7.8
2441	WORD	3.22	3.22	2233.7	81	20	84	85	192	275	29
2442	EXCEL	5.5	5.5	800.6	91	35	81	77	470	277	15
2443	WORD	4.5	4.5	2145.6	93	4.4	98	75	160	266	29
2444	WORD	4.5	4.5	2280.1	86	3.3	87	53	340	230	96.78
2445	EXCEL	2.66	2.66	2333.7	81	23	86	84	191.5	266	29
2446	WORD	4.5	4.5	2233.7	81	20	84	85	192	275	29
2447	WORD	5.6	5.6	266.5	80	17	94	74	355	245	7.8
2448	EXCEL	3.5	3.5	321.4	89	9	91	75	265	190	190
2449	WORD	6.6	6.6	3020.4	86	1.2	95	73	420	210	1.66
2450	WORD	4.5	4.5	140.2	91	15.3	97	67	88	90	0.93
2451	EXCEL	3.91	3.91	120	96	13.5	99	67	74	150	41.66
2452	WORD	4.44	4.44	95.4	86	6	86	73	66	60	1.5
2453	WORD	5.6	5.6	133.2	80	2.3	80	53	83	153	6.5
2454	EXCEL	3.91	3.91	99.3	72	13.3	72	73	72	63	4
2455	WORD	5.53	5.53	154.9	71	3	72	83	94	155	744
2456	WORD	7.91	7.91	370.1	83	15.2	84	83	68	65	3
2457	EXCEL	4.5	4.5	102.7	46	3.8	47	78	75	67	4.83
2458	WORD	3.5	3.5	760.7	91	7.9	97	73	149	115	9.2
2459	WORD	4.5	4.5	170.5	77	8.8	78	67	100	160	3.95
2460	EXCEL	5.6	5.6	115.9	18	4.3	18	60	75	70	5.15
2461	WORD	6.6	6.6	184.3	90	16.2	96	73	115	157	24.13
2462	WORD	5.5	5.5	149.6	88	1.7	96	53	90	150	43.25
2463	EXCEL	3.5	3.5	198.6	19	4.4	20	60	130	79	5.91
2464	WORD	4.5	4.5	114.9	88	21.2	96	73	74	69	23
2465	WORD	2.5	2.5	110.4	77	4.7	78	73	72	65	269.25
2466	EXCEL	3.6	3.6	1100.7	71	8.4	72	73	185	110	6
2467	WORD	2.53	2.53	515.2	86	9.2	95	73	69	220	8.8
2468	WORD	4.5	4.5	420.3	72	12.9	72	83	55	82	4.5
2469	EXCEL	1.5	1.5	750.8	100	12.1	100	80	166	92	1
2470	WORD	2.5	2.5	88.4	98	1.2	100	73	45	50	8.2
2471	WORD	3.5	3.5	820.4	100	1.4	100	67	130	95	42.6
2472	EXCEL	2.91	2.91	650.8	85	1.1	95	60	140	96	47
2473	WORD	7.22	7.22	98.3	87	2.6	95	60	145	63	26
2474	WORD	2.66	2.66	48.5	99	1.5	100	67	45	44	35.2
2475	EXCEL	1.5	1.5	110.5	63	7.8	63	73	70	60	14.66
2476	WORD	4.5	4.5	90.6	91	15.9	97	73	135	61	5.4
2477	WORD	1.5	1.5	103.6	63	2.7	64	67	144	63	152
2478	EXCEL	3.91	3.91	118.9	71	2.1	71	73	160	66	2.37
2479	WORD	3.2	3.2	99.3	91	4.8	91	60	140	65	31.17
2480	WORD	5.66	5.66	56.4	43	4.4	43	73	95	41	14.85
2481	EXCEL	3.66	3.66	820	83	1.3	94	62	139	95	48
2482	WORD	5.2	5.2	105	65	3.2	66	65	150	64	152
2483	WORD	2.5	2.5	2333.7	81	23	86	84	191.5	266	29
2484	EXCEL	1.5	1.5	2266.5	79	15.6	96	74	355	245	7.8
2485	WORD	3.21	3.21	2321.4	89	7.1	90	73	240	180	187.75
2486	WORD	4.11	4.11	800.6	96	1.4	99	67	580	480	6.4
2487	EXCEL	645	0.629883	1024.6	83	17	87.5	80	440	348	64
2488	WORD	3.77	3.77	2345.6	93	4.4	98	73	160	250	26.75
2489	WORD	3.5	3.5	2145.6	91	5.9	97	79	165	245	28.2
2490	EXCEL	1.55	1.55	2433.7	81	23	86	84	191.5	266	29
2491	WORD	3.5	3.5	2245.6	93	4.4	98	73	160	250	26.75
2492	WORD	4.2	4.2	2345.6	93	4.4	98	73	160	250	26.75
2493	EXCEL	2.6	2.6	2145.6	93	4.4	98	73	160	250	26.75
2494	WORD	4.5	4.5	2333.7	81	23	86	84	191.5	266	29
2495	WORD	2.5	2.5	2333.7	81	23	86	84	191.5	266	29
2496	EXCEL	3.7	3.7	2166.5	78	17	95	78	360	240	8.9
2497	WORD	4.5	4.5	2650.6	40	7	78	88	224	355	31
2498	WORD	5.6	5.6	1200.3	92	4.4	40	75	370	295	87.75
2499	EXCEL	3.66	3.66	1690.2	84	8.1	88	71	440	245	17
2500	WORD	2.5	2.5	2050.4	91.5	12	45	75	380	295	86.9
2501	WORD	4.66	4.66	2466.8	86	14.5	95	73	350	277	10.6
2502	EXCEL	3.5	3.5	266.5	79	15.6	96	74	355	245	7.8
2503	WORD	2.66	2.66	2321.4	89	7.1	90	73	240	180	187.75
2504	WORD	4.21	4.21	2166.5	75	16	93	75	650	233	7.8
2505	EXCEL	1.5	1.5	2840.6	91	8.1	63	74	320	250	40.84
2506	WORD	3.5	3.5	1800.6	91	23	82	75	470	277	10.6
2507	WORD	2.5	2.5	3640.3	73	36.3	86	73	470	420	1
2508	EXCEL	4.22	4.22	2322.4	86	8	89	72	238	183	190
2509	WORD	1.2	1.2	2333.7	78	23	86	84	191.5	266	29
2510	WORD	2.91	2.91	2333.7	81	23	86	84	191.5	266	29
2511	EXCEL	3.5	3.5	2333.7	81	23	86	84	191.5	266	29
2512	WORD	1.5	1.5	2466.8	86	14.5	95	73	350	277	10.6
2513	WORD	4.2	4.2	4145.2	92	3.3	91	78	450	390	15
2514	EXCEL	5.5	5.5	4720.7	81	1.7	95	85	192	275	29
2515	WORD	3.66	3.66	4420.7	91.5	19.7	86	83	190	270	31
2516	WORD	4.66	4.66	2233.7	81	20	84	85	192	275	29
2517	EXCEL	3.5	3.5	1333.7	81	23	86	84	191.5	266	29
2518	WORD	4.2	4.2	2466.8	86	14.5	95	73	350	277	10.6
2519	WORD	3.66	3.66	2744.8	86	1.4	62	68	160	255	1.75
2520	EXCEL	2.2	2.2	2345.6	86	1.5	84	78	640	480	6.4
2521	WORD	2.77	2.77	720.7	83	1.7	74	78	372	255	1.75
2522	WORD	1.55	1.55	266.5	79	15.6	96	74	355	245	7.8
2523	EXCEL	1.5	1.5	2233.7	81	20	84	85	192	275	29
2524	WORD	240	0.234375	800.6	91	35	81	77	470	277	15
2525	WORD	320	0.3125	2145.6	93	4.4	98	75	160	266	29
2526	EXCEL	66	0.0644531	2280.1	86	3.3	87	53	340	230	96.78
2527	WORD	75	0.0732422	2333.7	81	23	86	84	191.5	266	29
2528	WORD	110	0.107422	2233.7	81	20	84	85	192	275	29
2529	EXCEL	78	0.0761719	266.5	80	17	94	74	355	245	7.8
2530	WORD	2.91	2.91	321.4	89	9	91	75	265	190	190
2531	WORD	174	0.169922	3020.4	86	1.2	95	73	420	210	1.66
2532	EXCEL	112	0.109375	2280.1	86	3.3	87	53	340	230	96.78
2533	WORD	117	0.114258	2750.6	85	18.6	98	78	406	277	8.2
2534	WORD	2.66	2.66	1900.4	83	3.2	97	81	429	195	3.6
2535	EXCEL	240	0.234375	845.6	86	2.9	84	78	640	480	8
2536	WORD	350	0.341797	720.7	85	3.2	76	78	372	255	3.5
2537	WORD	320	0.3125	2300.1	23	1.8	24	42	350	260	334.1
2538	EXCEL	66	0.0644531	1460.3	88	7.1	96	73	220	135	13.67
2539	WORD	350	0.341797	377.3	83	22.3	84	83	50	80	4
2540	WORD	750	0.732422	1310.7	97	24.7	99	73	230	127	8.8
2541	EXCEL	66	0.0644531	845.6	86	2.9	84	78	640	480	8
2542	WORD	44	0.0429688	720.7	85	3.2	76	78	372	255	3.5
2543	WORD	125	0.12207	2333.7	81	23	86	84	191.5	266	29
2544	EXCEL	75	0.0732422	126.17	98	12	100	67	80	70	22.77
2545	WORD	88	0.0859375	107	87	1.9	95	73	75	65	58.33
2546	WORD	110	0.107422	140.2	91	15.3	97	67	88	90	0.93
2547	EXCEL	78	0.0761719	120	96	13.5	99	67	74	150	41.66
2548	WORD	5.6	5.6	95.4	86	6	86	73	66	60	1.5
2549	WORD	3.5	3.5	133.2	80	2.3	80	53	83	153	6.5
2550	EXCEL	3.6	3.6	99.3	72	13.3	72	73	72	63	4
2551	WORD	4.5	4.5	154.9	71	3	72	83	94	155	744
2552	WORD	3.91	3.91	370.1	83	15.2	84	83	68	65	3
2553	EXCEL	4.44	4.44	102.7	46	3.8	47	78	75	67	4.83
2554	WORD	3.6	3.6	760.7	91	7.9	97	73	149	115	9.2
2555	WORD	3.91	3.91	170.5	77	8.8	78	67	100	160	3.95
2556	EXCEL	5.53	5.53	115.9	18	4.3	18	60	75	70	5.15
2557	WORD	2.91	2.91	184.3	90	16.2	96	73	115	157	24.13
2558	WORD	4.5	4.5	149.6	88	1.7	96	53	90	150	43.25
2559	EXCEL	3.5	3.5	198.6	19	4.4	20	60	130	79	5.91
2560	WORD	4.5	4.5	114.9	88	21.2	96	73	74	69	23
2561	WORD	5.6	5.6	110.4	77	4.7	78	73	72	65	269.25
2562	EXCEL	6.6	6.6	1100.7	71	8.4	72	73	185	110	6
2563	WORD	1.5	1.5	515.2	86	9.2	95	73	69	220	8.8
2564	WORD	3.5	3.5	420.3	72	12.9	72	83	55	82	4.5
2565	EXCEL	4.5	4.5	750.8	100	12.1	100	80	166	92	1
2566	WORD	2.5	2.5	88.4	98	1.2	100	73	45	50	8.2
2567	WORD	3.6	3.6	820.4	100	1.4	100	67	130	95	42.6
2568	EXCEL	2.53	2.53	650.8	85	1.1	95	60	140	96	47
2569	WORD	4.5	4.5	98.3	87	2.6	95	60	145	63	26
2570	WORD	1.5	1.5	48.5	99	1.5	100	67	45	44	35.2
2571	EXCEL	2.5	2.5	110.5	63	7.8	63	73	70	60	14.66
2572	WORD	3.7	3.7	90.6	91	15.9	97	73	135	61	5.4
2573	WORD	4.5	4.5	103.6	63	2.7	64	67	144	63	152
2574	EXCEL	5.6	5.6	118.9	71	2.1	71	73	160	66	2.37
2575	WORD	3.66	3.66	99.3	91	4.8	91	60	140	65	31.17
2576	WORD	2.5	2.5	56.4	43	4.4	43	73	95	41	14.85
2577	EXCEL	4.66	4.66	820	83	1.3	94	62	139	95	48
2578	WORD	3.5	3.5	105	65	3.2	66	65	150	64	152
2579	WORD	2.66	2.66	2333.7	81	23	86	84	191.5	266	29
2580	EXCEL	4.21	4.21	2266.5	79	15.6	96	74	355	245	7.8
2581	WORD	1.5	1.5	2321.4	89	7.1	90	73	240	180	187.75
2582	WORD	3.5	3.5	800.6	96	1.4	99	67	580	480	6.4
2583	EXCEL	2.5	2.5	1024.6	83	17	87.5	80	440	348	64
2584	WORD	4.22	4.22	2345.6	93	4.4	98	73	160	250	26.75
2585	WORD	1.2	1.2	2145.6	91	5.9	97	79	165	245	28.2
2586	EXCEL	2.91	2.91	2433.7	81	23	86	84	191.5	266	29
2587	WORD	3.5	3.5	2245.6	93	4.4	98	73	160	250	26.75
2588	WORD	1.5	1.5	2345.6	93	4.4	98	73	160	250	26.75
2589	EXCEL	4.2	4.2	2145.6	93	4.4	98	73	160	250	26.75
2590	WORD	5.5	5.5	2333.7	81	23	86	84	191.5	266	29
2591	WORD	3.66	3.66	2333.7	81	23	86	84	191.5	266	29
2592	EXCEL	4.66	4.66	2166.5	78	17	95	78	360	240	8.9
2593	WORD	3.5	3.5	1200.3	92	4.4	40	75	370	295	87.75
2594	WORD	4.2	4.2	1690.2	84	8.1	88	71	440	245	17
2595	EXCEL	3.66	3.66	2050.4	91.5	12	45	75	380	295	86.9
2596	WORD	5.2	5.2	2466.8	86	14.5	95	73	350	277	10.6
2597	WORD	3.77	3.77	266.5	79	15.6	96	74	355	245	7.8
2598	EXCEL	1.55	1.55	2321.4	89	7.1	90	73	240	180	187.75
2599	WORD	3.5	3.5	2166.5	75	16	93	75	650	233	7.8
2600	WORD	240	0.234375	2840.6	91	8.1	63	74	320	250	40.84
2601	EXCEL	320	0.3125	1800.6	91	23	82	75	470	277	10.6
2602	WORD	66	0.0644531	3640.3	73	36.3	86	73	470	420	1
2603	WORD	75	0.0732422	2322.4	86	8	89	72	238	183	190
2604	EXCEL	110	0.107422	2333.7	78	23	86	84	191.5	266	29
2605	WORD	78	0.0761719	2333.7	81	23	86	84	191.5	266	29
2606	WORD	1.91	1.91	2333.7	81	23	86	84	191.5	266	29
2607	EXCEL	3.08	3.08	2466.8	86	14.5	95	73	350	277	10.6
2608	WORD	2.22	2.22	4145.2	92	3.3	91	78	450	390	15
2609	WORD	1.5	1.5	4720.7	81	1.7	95	85	192	275	29
2610	EXCEL	4.5	4.5	4420.7	91.5	19.7	86	83	190	270	31
2611	WORD	2.66	2.66	2233.7	81	20	84	85	192	275	29
2612	WORD	5.5	5.5	1333.7	81	23	86	84	191.5	266	29
2613	EXCEL	6.91	6.91	2466.8	86	14.5	95	73	350	277	10.6
2614	WORD	7.44	7.44	2744.8	86	1.4	62	68	160	255	1.75
2615	WORD	1.6	1.6	2345.6	86	1.5	84	78	640	480	6.4
2616	EXCEL	3.91	3.91	720.7	83	1.7	74	78	372	255	1.75
2617	WORD	4.53	4.53	266.5	79	15.6	96	74	355	245	7.8
2618	WORD	5.91	5.91	2233.7	81	20	84	85	192	275	29
2619	EXCEL	1.5	1.5	800.6	91	35	81	77	470	277	15
2620	WORD	2.5	2.5	2145.6	93	4.4	98	75	160	266	29
2621	WORD	4.5	4.5	2280.1	86	3.3	87	53	340	230	96.78
2622	EXCEL	5.6	5.6	2333.7	81	23	86	84	191.5	266	29
2623	WORD	6.6	6.6	2233.7	81	20	84	85	192	275	29
2624	WORD	5.5	5.5	266.5	80	17	94	74	355	245	7.8
2625	EXCEL	3.5	3.5	321.4	89	9	91	75	265	190	190
2626	WORD	4.5	4.5	3020.4	86	1.2	95	73	420	210	1.66
2627	WORD	2.5	2.5	2280.1	86	3.3	87	53	340	230	96.78
2628	EXCEL	3.6	3.6	2750.6	85	18.6	98	78	406	277	8.2
2629	WORD	2.53	2.53	1900.4	83	3.2	97	81	429	195	3.6
2630	WORD	3.5	3.5	845.6	86	2.9	84	78	640	480	8
2631	EXCEL	1.5	1.5	720.7	85	3.2	76	78	372	255	3.5
2632	WORD	2.5	2.5	2300.1	23	1.8	24	42	350	260	334.1
2633	WORD	3.5	3.5	1460.3	88	7.1	96	73	220	135	13.67
2634	EXCEL	2.91	2.91	377.3	83	22.3	84	83	50	80	4
2635	WORD	4.22	4.22	1310.7	97	24.7	99	73	230	127	8.8
2636	WORD	2.66	2.66	845.6	86	2.9	84	78	640	480	8
2637	EXCEL	1.5	1.5	720.7	85	3.2	76	78	372	255	3.5
2638	WORD	4.5	4.5	2333.7	81	23	86	84	191.5	266	29
2639	WORD	1.5	1.5	3020.4	86	1.2	95	73	420	210	1.66
2640	EXCEL	3.91	3.91	2466.8	86	14.5	95	73	350	277	10.6
2641	WORD	3.2	3.2	2750.6	85	18.6	98	78	406	277	8.2
2642	WORD	4.66	4.66	2750.6	85	18.6	98	78	406	277	8.2
2643	EXCEL	3.66	3.66	4600.4	86	10.1	95	73	530	400	87.75
2644	WORD	5.2	5.2	845.6	86	2.9	84	78	640	480	8
2645	WORD	2.5	2.5	1200.4	79	2.5	92	83	429	195	4.2
2646	EXCEL	1.5	1.5	2750.6	85	18.6	98	78	406	277	8.2
2647	WORD	7.21	7.21	440.7	36	0.9	37	60	97	74	15.91
2648	WORD	4.11	4.11	1400	70	4.8	70	73	220	125	3.63
2649	EXCEL	645	0.629883	1240	56	7.5	56	67	130	115	88.31
2650	WORD	3.77	3.77	377.3	83	22.3	84	83	50	80	4
2651	WORD	3.5	3.5	1100.8	69	9.7	70	73	195	120	44.75
2652	EXCEL	1.55	1.55	1520.7	85	9.4	95	67	250	135	6.66
2653	WORD	7.5	7.5	2850.6	91	8	89	72	238	183	190
2654	WORD	4.2	4.2	2421.4	81	23	86	84	191.5	266	29
2655	EXCEL	1.6	1.6	1700.1	93	4.4	98	73	160	250	26.75
2656	WORD	4.5	4.5	1222.4	89	7.1	90	73	240	180	187.75
2657	WORD	2.5	2.5	2245.6	81	20	84	85	192	275	29
2658	EXCEL	3.7	3.7	2566.8	91	5.9	97	79	165	245	28.2
2659	WORD	4.5	4.5	460	59	22	63	67	322	260	3.2
2660	WORD	5.6	5.6	1080	79	2.2	91	55	224	295	110.4
2661	EXCEL	3.66	3.66	1090	81	23	86	84	191.5	266	29
2662	WORD	2.5	2.5	433.7	126.17	98	12	100	67	80	70
2663	WORD	4.66	4.66	2466.8	107	87	1.9	95	73	75	65
2664	EXCEL	3.5	3.5	2266.5	140.2	91	15.3	97	67	88	90
2665	WORD	2.66	2.66	3740.3	120	96	13.5	99	67	74	150
2666	WORD	4.21	4.21	2740.6	95.4	86	6	86	73	66	60
2667	EXCEL	1.5	1.5	2145.6	133.2	80	2.3	80	53	83	153
2668	WORD	3.5	3.5	99.3	99.3	72	13.3	72	73	72	63
2669	WORD	2.5	2.5	56.4	154.9	71	3	72	83	94	155
2670	EXCEL	4.22	4.22	820	370.1	83	15.2	84	83	68	65
2671	WORD	1.2	1.2	105	102.7	46	3.8	47	78	75	67
2672	WORD	2.91	2.91	2333.7	760.7	91	7.9	97	73	149	115
2673	EXCEL	3.5	3.5	2266.5	170.5	77	8.8	78	67	100	160
2674	WORD	1.5	1.5	2321.4	115.9	18	4.3	18	60	75	70
2675	WORD	4.2	4.2	800.6	184.3	90	16.2	96	73	115	157
2676	EXCEL	5.5	5.5	1024.6	149.6	88	1.7	96	53	90	150
2677	WORD	3.66	3.66	2345.6	198.6	19	4.4	20	60	130	79
2678	WORD	4.66	4.66	2145.6	114.9	88	21.2	96	73	74	69
2679	EXCEL	3.5	3.5	2433.7	110.4	77	4.7	78	73	72	65
2680	WORD	4.2	4.2	2145.6	420.3	72	12.9	72	83	55	82
2681	WORD	3.66	3.66	2333.7	750.8	100	12.1	100	80	166	92
2682	EXCEL	5.2	5.2	2333.7	88.4	98	1.2	100	73	45	50
2683	WORD	3.77	3.77	2166.5	820.4	100	1.4	100	67	130	95
2684	WORD	1.55	1.55	2650.6	650.8	85	1.1	95	60	140	96
2685	EXCEL	7.5	7.5	1200.3	98.3	87	2.6	95	60	145	63
2686	WORD	240	0.234375	1690.2	48.5	99	1.5	100	67	45	44
2687	WORD	320	0.3125	133.2	110.5	63	7.8	63	73	70	60
2688	EXCEL	66	0.0644531	99.3	90.6	91	15.9	97	73	135	61
2689	WORD	75	0.0732422	154.9	103.6	63	2.7	64	67	144	63
2690	WORD	110	0.107422	370.1	118.9	71	2.1	71	73	160	66
2691	EXCEL	78	0.0761719	115.9	18	4.3	18	60	75	70	5.15
2692	WORD	2.91	2.91	184.3	90	16.2	96	73	115	157	24.13
2693	WORD	4.08	4.08	149.6	88	1.7	96	53	90	150	43.25
2694	EXCEL	1.22	1.22	198.6	19	4.4	20	60	130	79	5.91
2695	WORD	2.5	2.5	114.9	88	21.2	96	73	74	69	23
2696	WORD	4.5	4.5	110.4	77	4.7	78	73	72	65	269.25
2697	EXCEL	1.66	1.66	1100.7	71	8.4	72	73	185	110	6
2698	WORD	3.5	3.5	515.2	86	9.2	95	73	69	220	8.8
2699	WORD	7.44	7.44	420.3	72	12.9	72	83	55	82	4.5
2700	EXCEL	2.6	2.6	750.8	100	12.1	100	80	166	92	1
2701	WORD	4.5	4.5	88.4	98	1.2	100	73	45	50	8.2
2702	WORD	1.6	1.6	820.4	100	1.4	100	67	130	95	42.6
2703	EXCEL	2.5	2.5	650.8	85	1.1	95	60	140	96	47
2704	WORD	3.5	3.5	98.3	87	2.6	95	60	145	63	26
2705	WORD	3.5	3.5	48.5	99	1.5	100	67	45	44	35.2
2706	EXCEL	1.5	1.5	110.5	63	7.8	63	73	70	60	14.66
2707	WORD	4.2	4.2	90.6	91	15.9	97	73	135	61	5.4
2708	WORD	5.5	5.5	103.6	63	2.7	64	67	144	63	152
2709	EXCEL	3.66	3.66	118.9	71	2.1	71	73	160	66	2.37
2710	WORD	4.66	4.66	99.3	91	4.8	91	60	140	65	31.17
2711	WORD	3.5	3.5	56.4	43	4.4	43	73	95	41	14.85
2712	EXCEL	4.2	4.2	820	83	1.3	94	62	139	95	48
2713	WORD	3.66	3.66	105	65	3.2	66	65	150	64	152
2714	WORD	5.2	5.2	2333.7	81	23	86	84	191.5	266	29
2715	EXCEL	3.77	3.77	2266.5	79	15.6	96	74	355	245	7.8
2716	WORD	1.55	1.55	2321.4	89	7.1	90	73	240	180	187.75
2717	WORD	3.5	3.5	800.6	96	1.4	99	67	580	480	6.4
2718	EXCEL	240	0.234375	1024.6	83	17	87.5	80	440	348	64
2719	WORD	320	0.3125	2345.6	93	4.4	98	73	160	250	26.75
2720	WORD	66	0.0644531	2145.6	91	5.9	97	79	165	245	28.2
2721	EXCEL	75	0.0732422	2433.7	81	23	86	84	191.5	266	29
2722	WORD	110	0.107422	2245.6	93	4.4	98	73	160	250	26.75
2723	WORD	78	0.0761719	2345.6	93	4.4	98	73	160	250	26.75
2724	EXCEL	1.91	1.91	2145.6	93	4.4	98	73	160	250	26.75
2725	WORD	3.08	3.08	2333.7	81	23	86	84	191.5	266	29
2726	WORD	2.22	2.22	2333.7	81	23	86	84	191.5	266	29
2727	EXCEL	1.5	1.5	2166.5	78	17	95	78	360	240	8.9
2728	WORD	4.5	4.5	2650.6	40	7	78	88	224	355	31
2729	WORD	2.66	2.66	1200.3	92	4.4	40	75	370	295	87.75
2730	EXCEL	5.5	5.5	1690.2	84	8.1	88	71	440	245	17
2731	WORD	6.91	6.91	2050.4	91.5	12	45	75	380	295	86.9
2732	WORD	7.44	7.44	2466.8	86	14.5	95	73	350	277	10.6
2733	EXCEL	1.6	1.6	266.5	79	15.6	96	74	355	245	7.8
2734	WORD	3.91	3.91	2321.4	89	7.1	90	73	240	180	187.75
2735	WORD	4.53	4.53	2166.5	75	16	93	75	650	233	7.8
2736	EXCEL	5.91	5.91	2840.6	91	8.1	63	74	320	250	40.84
2737	WORD	1.5	1.5	1800.6	91	23	82	75	470	277	10.6
2738	WORD	2.5	2.5	3640.3	73	36.3	86	73	470	420	1
2739	EXCEL	4.5	4.5	2322.4	86	8	89	72	238	183	190
2740	WORD	5.6	5.6	2333.7	78	23	86	84	191.5	266	29
2741	WORD	6.6	6.6	2333.7	81	23	86	84	191.5	266	29
2742	EXCEL	5.63	5.63	2333.7	81	23	86	84	191.5	266	29
2743	WORD	3.1	3.1	2466.8	86	14.5	95	73	350	277	10.6
2744	WORD	4.2	4.2	4145.2	92	3.3	91	78	450	390	15
2745	EXCEL	122	0.119141	4720.7	81	1.7	95	85	192	275	29
2746	WORD	120	0.117188	4420.7	91.5	19.7	86	83	190	270	31
2747	WORD	156	0.152344	2233.7	81	20	84	85	192	275	29
2748	EXCEL	140	0.136719	1333.7	81	23	86	84	191.5	266	29
2749	WORD	88	0.0859375	2466.8	86	14.5	95	73	350	277	10.6
2750	WORD	142	0.138672	2744.8	86	1.4	62	68	160	255	1.75
2751	EXCEL	96	0.09375	2345.6	86	1.5	84	78	640	480	6.4
2752	WORD	148	0.144531	720.7	83	1.7	74	78	372	255	1.75
2753	WORD	250	0.244141	266.5	79	15.6	96	74	355	245	7.8
2754	EXCEL	115	0.112305	2233.7	81	20	84	85	192	275	29
2755	WORD	1.5	1.5	800.6	91	35	81	77	470	277	15
2756	WORD	156	0.152344	2145.6	93	4.4	98	75	160	266	29
2757	EXCEL	117	0.114258	2280.1	86	3.3	87	53	340	230	96.78
2758	WORD	166	0.162109	2333.7	81	23	86	84	191.5	266	29
2759	WORD	163	0.15918	2233.7	81	20	84	85	192	275	29
2760	EXCEL	174	0.169922	266.5	80	17	94	74	355	245	7.8
2761	WORD	112	0.109375	321.4	89	9	91	75	265	190	190
2762	WORD	117	0.114258	3020.4	86	1.2	95	73	420	210	1.66
2763	EXCEL	2.66	2.66	140.2	91	15.3	97	67	88	90	0.93
2764	WORD	240	0.234375	120	96	13.5	99	67	74	150	41.66
2765	WORD	350	0.341797	95.4	86	6	86	73	66	60	1.5
2766	EXCEL	320	0.3125	133.2	80	2.3	80	53	83	153	6.5
2767	WORD	66	0.0644531	99.3	72	13.3	72	73	72	63	4
2768	WORD	350	0.341797	154.9	71	3	72	83	94	155	744
2769	EXCEL	750	0.732422	370.1	83	15.2	84	83	68	65	3
2770	WORD	66	0.0644531	102.7	46	3.8	47	78	75	67	4.83
2771	WORD	44	0.0429688	760.7	91	7.9	97	73	149	115	9.2
2772	EXCEL	125	0.12207	170.5	77	8.8	78	67	100	160	3.95
2773	WORD	75	0.0732422	115.9	18	4.3	18	60	75	70	5.15
2774	WORD	88	0.0859375	184.3	90	16.2	96	73	115	157	24.13
2775	EXCEL	110	0.107422	149.6	88	1.7	96	53	90	150	43.25
2776	WORD	78	0.0761719	198.6	19	4.4	20	60	130	79	5.91
2777	WORD	55	0.0537109	114.9	88	21.2	96	73	74	69	23
2778	EXCEL	1.2	1.2	110.4	77	4.7	78	73	72	65	269.25
2779	WORD	90	0.0878906	1100.7	71	8.4	72	73	185	110	6
2780	WORD	1.5	1.5	515.2	86	9.2	95	73	69	220	8.8
2781	EXCEL	4.5	4.5	420.3	72	12.9	72	83	55	82	4.5
2782	WORD	3.91	3.91	750.8	100	12.1	100	80	166	92	1
2783	WORD	5.5	5.5	88.4	98	1.2	100	73	45	50	8.2
2784	EXCEL	1.08	1.08	820.4	100	1.4	100	67	130	95	42.6
2785	WORD	2.22	2.22	650.8	85	1.1	95	60	140	96	47
2786	WORD	3.22	3.22	98.3	87	2.6	95	60	145	63	26
2787	EXCEL	4.5	4.5	48.5	99	1.5	100	67	45	44	35.2
2788	WORD	3.27	3.27	110.5	63	7.8	63	73	70	60	14.66
2789	WORD	2.22	2.22	90.6	91	15.9	97	73	135	61	5.4
2790	EXCEL	3.22	3.22	103.6	63	2.7	64	67	144	63	152
2791	WORD	4.5	4.5	118.9	71	2.1	71	73	160	66	2.37
2792	WORD	3.5	3.5	99.3	91	4.8	91	60	140	65	31.17
2793	EXCEL	4.5	4.5	56.4	43	4.4	43	73	95	41	14.85
2794	WORD	4.66	4.66	820	83	1.3	94	62	139	95	48
2795	WORD	3.5	3.5	105	65	3.2	66	65	150	64	152
2796	EXCEL	1.6	1.6	2333.7	81	23	86	84	191.5	266	29
2797	WORD	2.5	2.5	2266.5	79	15.6	96	74	355	245	7.8
2798	WORD	4.6	4.6	2321.4	89	7.1	90	73	240	180	187.75
2799	EXCEL	5.5	5.5	800.6	96	1.4	99	67	580	480	6.4
2800	WORD	6.91	6.91	1024.6	83	17	87.5	80	440	348	64
2801	WORD	7.44	7.44	2345.6	93	4.4	98	73	160	250	26.75
2802	EXCEL	1.6	1.6	2145.6	91	5.9	97	79	165	245	28.2
2803	WORD	3.91	3.91	2433.7	81	23	86	84	191.5	266	29
2804	WORD	4.53	4.53	2245.6	93	4.4	98	73	160	250	26.75
2805	EXCEL	5.91	5.91	2345.6	93	4.4	98	73	160	250	26.75
2806	WORD	1.5	1.5	2145.6	93	4.4	98	73	160	250	26.75
2807	WORD	2.5	2.5	2333.7	81	23	86	84	191.5	266	29
2808	EXCEL	2.5	2.5	2333.7	81	23	86	84	191.5	266	29
2809	WORD	3.6	3.6	2166.5	78	17	95	78	360	240	8.9
2810	WORD	6.6	6.6	2650.6	40	7	78	88	224	355	31
2811	EXCEL	5.5	5.5	1200.3	92	4.4	40	75	370	295	87.75
2812	WORD	3.5	3.5	1690.2	84	8.1	88	71	440	245	17
2813	WORD	4.5	4.5	2050.4	91.5	12	45	75	380	295	86.9
2814	EXCEL	2.5	2.5	2466.8	86	14.5	95	73	350	277	10.6
2815	WORD	3.6	3.6	266.5	79	15.6	96	74	355	245	7.8
2816	WORD	7.53	7.53	2321.4	89	7.1	90	73	240	180	187.75
2817	EXCEL	7.5	7.5	126.17	98	12	100	67	80	70	22.77
2818	WORD	1.5	1.5	107	87	1.9	95	73	75	65	58.33
2819	WORD	2.5	2.5	140.2	91	15.3	97	67	88	90	0.93
2820	EXCEL	3.5	3.5	120	96	13.5	99	67	74	150	41.66
2821	WORD	2.91	2.91	95.4	86	6	86	73	66	60	1.5
2822	WORD	7.22	7.22	133.2	80	2.3	80	53	83	153	6.5
2823	EXCEL	2.66	2.66	99.3	72	13.3	72	73	72	63	4
2824	WORD	1.5	1.5	154.9	71	3	72	83	94	155	744
2825	WORD	4.5	4.5	370.1	83	15.2	84	83	68	65	3
2826	EXCEL	1.5	1.5	102.7	46	3.8	47	78	75	67	4.83
2827	WORD	3.91	3.91	760.7	91	7.9	97	73	149	115	9.2
2828	WORD	12.2	12.2	170.5	77	8.8	78	67	100	160	3.95
2829	EXCEL	5.66	5.66	115.9	18	4.3	18	60	75	70	5.15
2830	WORD	3.66	3.66	184.3	90	16.2	96	73	115	157	24.13
2831	WORD	5.2	5.2	149.6	88	1.7	96	53	90	150	43.25
2832	EXCEL	2.5	2.5	198.6	19	4.4	20	60	130	79	5.91
2833	WORD	1.5	1.5	114.9	88	21.2	96	73	74	69	23
2834	WORD	7.21	7.21	110.4	77	4.7	78	73	72	65	269.25
2835	EXCEL	4.11	4.11	1100.7	71	8.4	72	73	185	110	6
2836	WORD	645	0.629883	515.2	86	9.2	95	73	69	220	8.8
2837	WORD	3.77	3.77	420.3	72	12.9	72	83	55	82	4.5
2838	EXCEL	3.5	3.5	750.8	100	12.1	100	80	166	92	1
2839	WORD	1.55	1.55	88.4	98	1.2	100	73	45	50	8.2
2840	WORD	7.5	7.5	820.4	100	1.4	100	67	130	95	42.6
2841	EXCEL	4.2	4.2	650.8	85	1.1	95	60	140	96	47
2842	WORD	1.6	1.6	98.3	87	2.6	95	60	145	63	26
2843	WORD	4.5	4.5	48.5	99	1.5	100	67	45	44	35.2
2844	EXCEL	2.5	2.5	110.5	63	7.8	63	73	70	60	14.66
2845	WORD	3.7	3.7	90.6	91	15.9	97	73	135	61	5.4
2846	WORD	2.5	2.5	103.6	63	2.7	64	67	144	63	152
2847	EXCEL	5.6	5.6	118.9	71	2.1	71	73	160	66	2.37
2848	WORD	2.66	2.66	99.3	91	4.8	91	60	140	65	31.17
2849	WORD	2.5	2.5	56.4	43	4.4	43	73	95	41	14.85
2850	EXCEL	1.66	1.66	820	83	1.3	94	62	139	95	48
2851	WORD	2.5	2.5	105	65	3.2	66	65	150	64	152
2852	WORD	4.6	4.6	2333.7	81	23	86	84	191.5	266	29
2853	EXCEL	5.5	5.5	2266.5	79	15.6	96	74	355	245	7.8
2854	WORD	6.91	6.91	2321.4	89	7.1	90	73	240	180	187.75
2855	WORD	7.44	7.44	800.6	96	1.4	99	67	580	480	6.4
2856	EXCEL	1.6	1.6	1024.6	83	17	87.5	80	440	348	64
2857	WORD	3.91	3.91	2345.6	93	4.4	98	73	160	250	26.75
2858	WORD	4.53	4.53	2145.6	91	5.9	97	79	165	245	28.2
2859	EXCEL	5.91	5.91	2433.7	81	23	86	84	191.5	266	29
2860	WORD	1.5	1.5	2245.6	93	4.4	98	73	160	250	26.75
2861	WORD	2.5	2.5	2345.6	93	4.4	98	73	160	250	26.75
2862	EXCEL	4.5	4.5	2145.6	93	4.4	98	73	160	250	26.75
2863	WORD	5.6	5.6	2333.7	81	23	86	84	191.5	266	29
2864	WORD	6.6	6.6	2333.7	81	23	86	84	191.5	266	29
2865	EXCEL	5.5	5.5	2166.5	78	17	95	78	360	240	8.9
2866	WORD	3.5	3.5	2650.6	40	7	78	88	224	355	31
2867	WORD	4.5	4.5	1200.3	92	4.4	40	75	370	295	87.75
2868	EXCEL	2.5	2.5	1690.2	84	8.1	88	71	440	245	17
2869	WORD	3.6	3.6	2050.4	91.5	12	45	75	380	295	86.9
2870	WORD	7.53	7.53	2466.8	86	14.5	95	73	350	277	10.6
2871	EXCEL	7.5	7.5	266.5	79	15.6	96	74	355	245	7.8
2872	WORD	1.5	1.5	2321.4	89	7.1	90	73	240	180	187.75
2873	WORD	2.5	2.5	2166.5	75	16	93	75	650	233	7.8
2874	EXCEL	3.5	3.5	2840.6	91	8.1	63	74	320	250	40.84
2875	WORD	2.91	2.91	1800.6	91	23	82	75	470	277	10.6
2876	WORD	7.22	7.22	3640.3	73	36.3	86	73	470	420	1
2877	EXCEL	2.66	2.66	2322.4	86	8	89	72	238	183	190
2878	WORD	1.5	1.5	2333.7	78	23	86	84	191.5	266	29
2879	WORD	4.5	4.5	2333.7	81	23	86	84	191.5	266	29
2880	EXCEL	1.5	1.5	2333.7	81	23	86	84	191.5	266	29
2881	WORD	3.91	3.91	2466.8	86	14.5	95	73	350	277	10.6
2882	WORD	12.2	12.2	4145.2	92	3.3	91	78	450	390	15
2883	EXCEL	7.66	7.66	4720.7	81	1.7	95	85	192	275	29
2884	WORD	3.66	3.66	4420.7	91.5	19.7	86	83	190	270	31
2885	WORD	5.2	5.2	2233.7	81	20	84	85	192	275	29
2886	EXCEL	2.5	2.5	1333.7	81	23	86	84	191.5	266	29
2887	WORD	1.5	1.5	2466.8	86	14.5	95	73	350	277	10.6
2888	WORD	7.21	7.21	2744.8	86	1.4	62	68	160	255	1.75
2889	EXCEL	4.11	4.11	2345.6	86	1.5	84	78	640	480	6.4
2890	WORD	645	0.629883	720.7	83	1.7	74	78	372	255	1.75
2891	WORD	3.77	3.77	266.5	79	15.6	96	74	355	245	7.8
2892	EXCEL	3.5	3.5	2233.7	81	20	84	85	192	275	29
2893	WORD	1.55	1.55	800.6	91	35	81	77	470	277	15
2894	WORD	7.5	7.5	2145.6	93	4.4	98	75	160	266	29
2895	EXCEL	4.2	4.2	2280.1	86	3.3	87	53	340	230	96.78
2896	WORD	1.6	1.6	2333.7	81	23	86	84	191.5	266	29
2897	WORD	4.5	4.5	2233.7	81	20	84	85	192	275	29
2898	EXCEL	2.5	2.5	266.5	80	17	94	74	355	245	7.8
2899	WORD	3.7	3.7	321.4	89	9	91	75	265	190	190
2900	WORD	4.5	4.5	3020.4	86	1.2	95	73	420	210	1.66
2901	EXCEL	5.6	5.6	2280.1	86	3.3	87	53	340	230	96.78
2902	WORD	3.66	3.66	2750.6	85	18.6	98	78	406	277	8.2
2903	WORD	2.5	2.5	1900.4	83	3.2	97	81	429	195	3.6
2904	EXCEL	4.66	4.66	845.6	86	2.9	84	78	640	480	8
2905	WORD	3.5	3.5	720.7	85	3.2	76	78	372	255	3.5
2906	WORD	2.66	2.66	2300.1	23	1.8	24	42	350	260	334.1
2907	EXCEL	4.21	4.21	1240	56	7.5	56	67	130	115	88.31
2908	WORD	1.5	1.5	377.3	83	22.3	84	83	50	80	4
2909	WORD	3.5	3.5	1100.8	69	9.7	70	73	195	120	44.75
2910	EXCEL	2.5	2.5	1520.7	85	9.4	95	67	250	135	6.66
2911	WORD	4.22	4.22	2850.6	91	8	89	72	238	183	190
2912	WORD	1.2	1.2	2421.4	81	23	86	84	191.5	266	29
2913	EXCEL	2.91	2.91	1700.1	93	4.4	98	73	160	250	26.75
2914	WORD	3.5	3.5	1222.4	89	7.1	90	73	240	180	187.75
2915	WORD	1.5	1.5	2245.6	81	20	84	85	192	275	29
2916	EXCEL	4.2	4.2	2566.8	91	5.9	97	79	165	245	28.2
2917	WORD	5.5	5.5	460	59	22	63	67	322	260	3.2
2918	WORD	3.66	3.66	1080	79	2.2	91	55	224	295	110.4
2919	EXCEL	4.66	4.66	1090	81	23	86	84	191.5	266	29
2920	WORD	3.5	3.5	433.7	126.17	98	12	100	67	80	70
2921	WORD	4.2	4.2	2466.8	107	87	1.9	95	73	75	65
2922	EXCEL	3.66	3.66	2266.5	140.2	91	15.3	97	67	88	90
2923	WORD	5.2	5.2	3740.3	120	96	13.5	99	67	74	150
2924	WORD	3.77	3.77	2740.6	95.4	86	6	86	73	66	60
2925	EXCEL	1.55	1.55	2145.6	133.2	80	2.3	80	53	83	153
2926	WORD	7.5	7.5	99.3	99.3	72	13.3	72	73	72	63
2927	WORD	240	0.234375	56.4	154.9	71	3	72	83	94	155
2928	EXCEL	320	0.3125	820	370.1	83	15.2	84	83	68	65
2929	WORD	66	0.0644531	105	102.7	46	3.8	47	78	75	67
2930	WORD	75	0.0732422	2333.7	760.7	91	7.9	97	73	149	115
2931	EXCEL	110	0.107422	2266.5	170.5	77	8.8	78	67	100	160
2932	WORD	78	0.0761719	2321.4	115.9	18	4.3	18	60	75	70
2933	WORD	6.91	6.91	800.6	184.3	90	16.2	96	73	115	157
2934	EXCEL	9.08	9.08	1024.6	149.6	88	1.7	96	53	90	150
2935	WORD	9.22	9.22	2345.6	198.6	19	4.4	20	60	130	79
2936	WORD	8.5	8.5	2145.6	114.9	88	21.2	96	73	74	69
2937	EXCEL	4.5	4.5	2433.7	110.4	77	4.7	78	73	72	65
2938	WORD	7.66	7.66	2245.6	1100.7	71	8.4	72	73	185	110
2939	WORD	8.5	8.5	2345.6	515.2	86	9.2	95	73	69	220
2940	EXCEL	7.44	7.44	2145.6	420.3	72	12.9	72	83	55	82
2941	WORD	9.6	9.6	2333.7	750.8	100	12.1	100	80	166	92
2942	WORD	4.5	4.5	2333.7	88.4	98	1.2	100	73	45	50
2943	EXCEL	6.6	6.6	2166.5	820.4	100	1.4	100	67	130	95
2944	WORD	5.5	5.5	2650.6	650.8	85	1.1	95	60	140	96
2945	WORD	7.5	7.5	1200.3	98.3	87	2.6	95	60	145	63
2946	EXCEL	2.5	2.5	1690.2	48.5	99	1.5	100	67	45	44
2947	WORD	3.5	3.5	133.2	110.5	63	7.8	63	73	70	60
2948	WORD	1.5	1.5	99.3	90.6	91	15.9	97	73	135	61
2949	EXCEL	12.2	12.2	154.9	103.6	63	2.7	64	67	144	63
2950	WORD	7.66	7.66	370.1	118.9	71	2.1	71	73	160	66
2951	WORD	1.5	1.5	115.9	18	4.3	18	60	75	70	5.15
2952	EXCEL	750	0.732422	184.3	90	16.2	96	73	115	157	24.13
2953	WORD	320	0.3125	149.6	88	1.7	96	53	90	150	43.25
2954	WORD	2.1	2.1	198.6	19	4.4	20	60	130	79	5.91
2955	EXCEL	6.91	6.91	114.9	88	21.2	96	73	74	69	23
2956	WORD	9.08	9.08	110.4	77	4.7	78	73	72	65	269.25
2957	WORD	7.44	7.44	1100.7	71	8.4	72	73	185	110	6
2958	EXCEL	4.5	4.5	515.2	86	9.2	95	73	69	220	8.8
2959	WORD	6.6	6.6	420.3	72	12.9	72	83	55	82	4.5
2960	WORD	3.5	3.5	750.8	100	12.1	100	80	166	92	1
2961	EXCEL	4.2	4.2	88.4	98	1.2	100	73	45	50	8.2
2962	WORD	5.5	5.5	820.4	100	1.4	100	67	130	95	42.6
2963	WORD	5.2	5.2	650.8	85	1.1	95	60	140	96	47
2964	EXCEL	1.55	1.55	98.3	87	2.6	95	60	145	63	26
2965	WORD	7.5	7.5	48.5	99	1.5	100	67	45	44	35.2
2966	WORD	7.66	7.66	110.5	63	7.8	63	73	70	60	14.66
2967	EXCEL	5.2	5.2	90.6	91	15.9	97	73	135	61	5.4
2968	WORD	2.5	2.5	103.6	63	2.7	64	67	144	63	152
2969	WORD	3.5	3.5	118.9	71	2.1	71	73	160	66	2.37
2970	EXCEL	7.5	7.5	99.3	91	4.8	91	60	140	65	31.17
2971	WORD	4.2	4.2	56.4	43	4.4	43	73	95	41	14.85
2972	WORD	5.6	5.6	820	83	1.3	94	62	139	95	48
2973	EXCEL	2.5	2.5	105	65	3.2	66	65	150	64	152
2974	WORD	4.66	4.66	2333.7	81	23	86	84	191.5	266	29
2975	WORD	250	0.244141	2266.5	79	15.6	96	74	355	245	7.8
2976	EXCEL	115	0.112305	2321.4	89	7.1	90	73	240	180	187.75
2977	WORD	1.5	1.5	800.6	96	1.4	99	67	580	480	6.4
2978	WORD	156	0.152344	1024.6	83	17	87.5	80	440	348	64
2979	EXCEL	117	0.114258	2345.6	93	4.4	98	73	160	250	26.75
2980	WORD	166	0.162109	2145.6	91	5.9	97	79	165	245	28.2
2981	WORD	163	0.15918	2433.7	81	23	86	84	191.5	266	29
2982	EXCEL	174	0.169922	2245.6	93	4.4	98	73	160	250	26.75
2983	WORD	112	0.109375	2345.6	93	4.4	98	73	160	250	26.75
2984	WORD	117	0.114258	2145.6	93	4.4	98	73	160	250	26.75
2985	EXCEL	2.66	2.66	2333.7	81	23	86	84	191.5	266	29
2986	WORD	240	0.234375	2333.7	81	23	86	84	191.5	266	29
2987	WORD	350	0.341797	2166.5	78	17	95	78	360	240	8.9
2988	EXCEL	320	0.3125	2650.6	40	7	78	88	224	355	31
2989	WORD	66	0.0644531	1200.3	92	4.4	40	75	370	295	87.75
2990	WORD	350	0.341797	1690.2	84	8.1	88	71	440	245	17
2991	EXCEL	750	0.732422	2050.4	91.5	12	45	75	380	295	86.9
2992	WORD	66	0.0644531	2466.8	86	14.5	95	73	350	277	10.6
2993	WORD	44	0.0429688	266.5	79	15.6	96	74	355	245	7.8
2994	EXCEL	125	0.12207	2321.4	89	7.1	90	73	240	180	187.75
2995	WORD	75	0.0732422	2166.5	75	16	93	75	650	233	7.8
2996	WORD	88	0.0859375	2840.6	91	8.1	63	74	320	250	40.84
2997	EXCEL	110	0.107422	1800.6	91	23	82	75	470	277	10.6
2998	WORD	78	0.0761719	3640.3	73	36.3	86	73	470	420	1
2999	WORD	55	0.0537109	2322.4	86	8	89	72	238	183	190
3000	EXCEL	1.2	1.2	2333.7	78	23	86	84	191.5	266	29
3001	WORD	90	0.0878906	2333.7	81	23	86	84	191.5	266	29
3002	WORD	8.5	8.5	2333.7	81	23	86	84	191.5	266	29
3003	EXCEL	8.5	8.5	2466.8	86	14.5	95	73	350	277	10.6
3004	WORD	6.91	6.91	4145.2	92	3.3	91	78	450	390	15
3005	WORD	9.5	9.5	4720.7	81	1.7	95	85	192	275	29
3006	EXCEL	9.08	9.08	4420.7	91.5	19.7	86	83	190	270	31
3007	WORD	2.22	2.22	2233.7	81	20	84	85	192	275	29
3008	WORD	7.22	7.22	1333.7	81	23	86	84	191.5	266	29
3009	EXCEL	6.5	6.5	2466.8	86	14.5	95	73	350	277	10.6
3010	WORD	6.27	6.27	2744.8	86	1.4	62	68	160	255	1.75
3011	WORD	4.22	4.22	2345.6	86	1.5	84	78	640	480	6.4
3012	EXCEL	3.22	3.22	720.7	83	1.7	74	78	372	255	1.75
3013	WORD	5.5	5.5	266.5	79	15.6	96	74	355	245	7.8
3014	WORD	4.5	4.5	2233.7	81	20	84	85	192	275	29
3015	EXCEL	4.5	4.5	800.6	91	35	81	77	470	277	15
3016	WORD	2.66	2.66	2145.6	93	4.4	98	75	160	266	29
3017	WORD	4.5	4.5	2280.1	86	3.3	87	53	340	230	96.78
3018	EXCEL	5.6	5.6	2333.7	81	23	86	84	191.5	266	29
3019	WORD	3.5	3.5	2233.7	81	20	84	85	192	275	29
3020	WORD	6.6	6.6	266.5	80	17	94	74	355	245	7.8
3021	EXCEL	4.5	4.5	321.4	89	9	91	75	265	190	190
3022	WORD	3.91	3.91	3020.4	86	1.2	95	73	420	210	1.66
3023	WORD	4.44	4.44	140.2	91	15.3	97	67	88	90	0.93
3024	EXCEL	5.6	5.6	120	96	13.5	99	67	74	150	41.66
3025	WORD	3.91	3.91	95.4	86	6	86	73	66	60	1.5
3026	WORD	5.53	5.53	133.2	80	2.3	80	53	83	153	6.5
3027	EXCEL	7.91	7.91	99.3	72	13.3	72	73	72	63	4
3028	WORD	4.5	4.5	154.9	71	3	72	83	94	155	744
3029	WORD	3.5	3.5	370.1	83	15.2	84	83	68	65	3
3030	EXCEL	4.5	4.5	102.7	46	3.8	47	78	75	67	4.83
3031	WORD	5.6	5.6	760.7	91	7.9	97	73	149	115	9.2
3032	WORD	6.6	6.6	170.5	77	8.8	78	67	100	160	3.95
3033	EXCEL	5.5	5.5	115.9	18	4.3	18	60	75	70	5.15
3034	WORD	3.5	3.5	184.3	90	16.2	96	73	115	157	24.13
3035	WORD	4.5	4.5	149.6	88	1.7	96	53	90	150	43.25
3036	EXCEL	2.5	2.5	198.6	19	4.4	20	60	130	79	5.91
3037	WORD	3.6	3.6	114.9	88	21.2	96	73	74	69	23
3038	WORD	2.53	2.53	110.4	77	4.7	78	73	72	65	269.25
3039	EXCEL	4.5	4.5	1100.7	71	8.4	72	73	185	110	6
3040	WORD	1.5	1.5	515.2	86	9.2	95	73	69	220	8.8
3041	WORD	2.5	2.5	420.3	72	12.9	72	83	55	82	4.5
3042	EXCEL	3.5	3.5	750.8	100	12.1	100	80	166	92	1
3043	WORD	2.91	2.91	88.4	98	1.2	100	73	45	50	8.2
3044	WORD	7.22	7.22	820.4	100	1.4	100	67	130	95	42.6
3045	EXCEL	2.66	2.66	650.8	85	1.1	95	60	140	96	47
3046	WORD	1.5	1.5	98.3	87	2.6	95	60	145	63	26
3047	WORD	4.5	4.5	48.5	99	1.5	100	67	45	44	35.2
3048	EXCEL	1.5	1.5	110.5	63	7.8	63	73	70	60	14.66
3049	WORD	3.91	3.91	90.6	91	15.9	97	73	135	61	5.4
3050	WORD	3.2	3.2	103.6	63	2.7	64	67	144	63	152
3051	EXCEL	5.66	5.66	118.9	71	2.1	71	73	160	66	2.37
3052	WORD	3.66	3.66	99.3	91	4.8	91	60	140	65	31.17
3053	WORD	5.2	5.2	56.4	43	4.4	43	73	95	41	14.85
3054	EXCEL	2.5	2.5	820	83	1.3	94	62	139	95	48
3055	WORD	1.5	1.5	105	65	3.2	66	65	150	64	152
3056	WORD	3.21	3.21	2333.7	81	23	86	84	191.5	266	29
3057	EXCEL	4.11	4.11	2266.5	79	15.6	96	74	355	245	7.8
3058	WORD	645	0.629883	2321.4	89	7.1	90	73	240	180	187.75
3059	WORD	3.77	3.77	800.6	96	1.4	99	67	580	480	6.4
3060	EXCEL	3.5	3.5	1024.6	83	17	87.5	80	440	348	64
3061	WORD	1.55	1.55	2345.6	93	4.4	98	73	160	250	26.75
3062	WORD	3.5	3.5	2145.6	91	5.9	97	79	165	245	28.2
3063	EXCEL	4.2	4.2	2433.7	81	23	86	84	191.5	266	29
3064	WORD	2.6	2.6	2245.6	93	4.4	98	73	160	250	26.75
3065	WORD	4.5	4.5	2345.6	93	4.4	98	73	160	250	26.75
3066	EXCEL	2.5	2.5	2145.6	93	4.4	98	73	160	250	26.75
3067	WORD	3.7	3.7	2333.7	81	23	86	84	191.5	266	29
3068	WORD	4.5	4.5	2333.7	81	23	86	84	191.5	266	29
3069	EXCEL	5.6	5.6	2166.5	78	17	95	78	360	240	8.9
3070	WORD	3.66	3.66	2650.6	40	7	78	88	224	355	31
3071	WORD	2.5	2.5	1200.3	92	4.4	40	75	370	295	87.75
3072	EXCEL	4.66	4.66	1690.2	84	8.1	88	71	440	245	17
3073	WORD	3.5	3.5	2050.4	91.5	12	45	75	380	295	86.9
3074	WORD	2.66	2.66	2466.8	86	14.5	95	73	350	277	10.6
3075	EXCEL	4.21	4.21	266.5	79	15.6	96	74	355	245	7.8
3076	WORD	1.5	1.5	2321.4	89	7.1	90	73	240	180	187.75
3077	WORD	3.5	3.5	2166.5	75	16	93	75	650	233	7.8
3078	EXCEL	2.5	2.5	2840.6	91	8.1	63	74	320	250	40.84
3079	WORD	4.22	4.22	1800.6	91	23	82	75	470	277	10.6
3080	WORD	1.2	1.2	3640.3	73	36.3	86	73	470	420	1
3081	EXCEL	2.91	2.91	2322.4	86	8	89	72	238	183	190
3082	WORD	3.5	3.5	2333.7	78	23	86	84	191.5	266	29
3083	WORD	1.5	1.5	2333.7	81	23	86	84	191.5	266	29
3084	EXCEL	4.2	4.2	2333.7	81	23	86	84	191.5	266	29
3085	WORD	5.5	5.5	2466.8	86	14.5	95	73	350	277	10.6
3086	WORD	3.66	3.66	4145.2	92	3.3	91	78	450	390	15
3087	EXCEL	4.66	4.66	4720.7	81	1.7	95	85	192	275	29
3088	WORD	3.5	3.5	4420.7	91.5	19.7	86	83	190	270	31
3089	WORD	4.2	4.2	2233.7	81	20	84	85	192	275	29
3090	EXCEL	3.66	3.66	1333.7	81	23	86	84	191.5	266	29
3091	WORD	2.2	2.2	2466.8	86	14.5	95	73	350	277	10.6
3092	WORD	2.77	2.77	2744.8	86	1.4	62	68	160	255	1.75
3093	EXCEL	1.55	1.55	2345.6	86	1.5	84	78	640	480	6.4
3094	WORD	1.5	1.5	720.7	83	1.7	74	78	372	255	1.75
3095	WORD	240	0.234375	266.5	79	15.6	96	74	355	245	7.8
3096	EXCEL	320	0.3125	2233.7	81	20	84	85	192	275	29
3097	WORD	66	0.0644531	800.6	91	35	81	77	470	277	15
3098	WORD	75	0.0732422	2145.6	93	4.4	98	75	160	266	29
3099	EXCEL	110	0.107422	2280.1	86	3.3	87	53	340	230	96.78
3100	WORD	78	0.0761719	2333.7	81	23	86	84	191.5	266	29
3101	WORD	2.91	2.91	2233.7	81	20	84	85	192	275	29
3102	EXCEL	174	0.169922	266.5	80	17	94	74	355	245	7.8
3103	WORD	112	0.109375	321.4	89	9	91	75	265	190	190
3104	WORD	117	0.114258	3020.4	86	1.2	95	73	420	210	1.66
3105	EXCEL	2.66	2.66	2280.1	86	3.3	87	53	340	230	96.78
3106	WORD	240	0.234375	2750.6	85	18.6	98	78	406	277	8.2
3107	WORD	350	0.341797	1900.4	83	3.2	97	81	429	195	3.6
3108	EXCEL	320	0.3125	845.6	86	2.9	84	78	640	480	8
3109	WORD	66	0.0644531	720.7	85	3.2	76	78	372	255	3.5
3110	WORD	350	0.341797	2300.1	23	1.8	24	42	350	260	334.1
3111	EXCEL	750	0.732422	1460.3	88	7.1	96	73	220	135	13.67
3112	WORD	66	0.0644531	377.3	83	22.3	84	83	50	80	4
3113	WORD	44	0.0429688	1310.7	97	24.7	99	73	230	127	8.8
3114	EXCEL	125	0.12207	845.6	86	2.9	84	78	640	480	8
3115	WORD	75	0.0732422	720.7	85	3.2	76	78	372	255	3.5
3116	WORD	88	0.0859375	2333.7	81	23	86	84	191.5	266	29
3117	EXCEL	110	0.107422	126.17	98	12	100	67	80	70	22.77
3118	WORD	78	0.0761719	107	87	1.9	95	73	75	65	58.33
3119	WORD	5.6	5.6	140.2	91	15.3	97	67	88	90	0.93
3120	EXCEL	3.5	3.5	120	96	13.5	99	67	74	150	41.66
3121	WORD	3.6	3.6	95.4	86	6	86	73	66	60	1.5
3122	WORD	4.5	4.5	133.2	80	2.3	80	53	83	153	6.5
3123	EXCEL	3.91	3.91	99.3	72	13.3	72	73	72	63	4
3124	WORD	4.44	4.44	154.9	71	3	72	83	94	155	744
3125	WORD	3.6	3.6	370.1	83	15.2	84	83	68	65	3
3126	EXCEL	3.91	3.91	102.7	46	3.8	47	78	75	67	4.83
3127	WORD	5.53	5.53	760.7	91	7.9	97	73	149	115	9.2
3128	WORD	2.91	2.91	170.5	77	8.8	78	67	100	160	3.95
3129	EXCEL	4.5	4.5	115.9	18	4.3	18	60	75	70	5.15
3130	WORD	3.5	3.5	184.3	90	16.2	96	73	115	157	24.13
3131	WORD	4.5	4.5	149.6	88	1.7	96	53	90	150	43.25
3132	EXCEL	5.6	5.6	198.6	19	4.4	20	60	130	79	5.91
3133	WORD	6.6	6.6	114.9	88	21.2	96	73	74	69	23
3134	WORD	1.5	1.5	110.4	77	4.7	78	73	72	65	269.25
3135	EXCEL	3.5	3.5	1100.7	71	8.4	72	73	185	110	6
3136	WORD	4.5	4.5	515.2	86	9.2	95	73	69	220	8.8
3137	WORD	2.5	2.5	420.3	72	12.9	72	83	55	82	4.5
3138	EXCEL	3.6	3.6	750.8	100	12.1	100	80	166	92	1
3139	WORD	2.53	2.53	88.4	98	1.2	100	73	45	50	8.2
3140	WORD	2.5	2.5	820.4	100	1.4	100	67	130	95	42.6
3141	EXCEL	1.5	1.5	650.8	85	1.1	95	60	140	96	47
3142	WORD	2.5	2.5	98.3	87	2.6	95	60	145	63	26
3143	WORD	3.7	3.7	48.5	99	1.5	100	67	45	44	35.2
3144	EXCEL	1.5	1.5	110.5	63	7.8	63	73	70	60	14.66
3145	WORD	5.6	5.6	90.6	91	15.9	97	73	135	61	5.4
3146	WORD	3.66	3.66	103.6	63	2.7	64	67	144	63	152
3147	EXCEL	2.5	2.5	118.9	71	2.1	71	73	160	66	2.37
3148	WORD	2.66	2.66	99.3	91	4.8	91	60	140	65	31.17
3149	WORD	3.5	3.5	56.4	43	4.4	43	73	95	41	14.85
3150	EXCEL	2.66	2.66	820	83	1.3	94	62	139	95	48
3151	WORD	4.21	4.21	105	65	3.2	66	65	150	64	152
3152	WORD	1.5	1.5	2333.7	81	23	86	84	191.5	266	29
3153	EXCEL	3.5	3.5	2266.5	79	15.6	96	74	355	245	7.8
3154	WORD	2.5	2.5	2321.4	89	7.1	90	73	240	180	187.75
3155	WORD	3.22	3.22	800.6	96	1.4	99	67	580	480	6.4
3156	EXCEL	3.1	3.1	1024.6	83	17	87.5	80	440	348	64
3157	WORD	4.2	4.2	2345.6	93	4.4	98	73	160	250	26.75
3158	WORD	122	0.119141	2145.6	91	5.9	97	79	165	245	28.2
3159	EXCEL	120	0.117188	2433.7	81	23	86	84	191.5	266	29
3160	WORD	156	0.152344	2245.6	93	4.4	98	73	160	250	26.75
3161	WORD	140	0.136719	2345.6	93	4.4	98	73	160	250	26.75
3162	EXCEL	88	0.0859375	2145.6	93	4.4	98	73	160	250	26.75
3163	WORD	142	0.138672	2333.7	81	23	86	84	191.5	266	29
3164	WORD	96	0.09375	2333.7	81	23	86	84	191.5	266	29
3165	EXCEL	148	0.144531	2166.5	78	17	95	78	360	240	8.9
3166	WORD	250	0.244141	1200.3	92	4.4	40	75	370	295	87.75
3167	WORD	115	0.112305	1690.2	84	8.1	88	71	440	245	17
3168	EXCEL	1.5	1.5	2050.4	91.5	12	45	75	380	295	86.9
3169	WORD	156	0.152344	2466.8	86	14.5	95	73	350	277	10.6
3170	WORD	117	0.114258	266.5	79	15.6	96	74	355	245	7.8
3171	EXCEL	166	0.162109	2321.4	89	7.1	90	73	240	180	187.75
3172	WORD	163	0.15918	2166.5	75	16	93	75	650	233	7.8
3173	WORD	174	0.169922	2840.6	91	8.1	63	74	320	250	40.84
3174	EXCEL	112	0.109375	1800.6	91	23	82	75	470	277	10.6
3175	WORD	117	0.114258	3640.3	73	36.3	86	73	470	420	1
3176	WORD	2.66	2.66	2322.4	86	8	89	72	238	183	190
3177	EXCEL	240	0.234375	2333.7	78	23	86	84	191.5	266	29
3178	WORD	350	0.341797	2333.7	81	23	86	84	191.5	266	29
3179	WORD	320	0.3125	2333.7	81	23	86	84	191.5	266	29
3180	EXCEL	66	0.0644531	2466.8	86	14.5	95	73	350	277	10.6
3181	WORD	350	0.341797	4145.2	92	3.3	91	78	450	390	15
3182	WORD	750	0.732422	4720.7	81	1.7	95	85	192	275	29
3183	EXCEL	66	0.0644531	4420.7	91.5	19.7	86	83	190	270	31
3184	WORD	44	0.0429688	2233.7	81	20	84	85	192	275	29
3185	WORD	125	0.12207	1333.7	81	23	86	84	191.5	266	29
3186	EXCEL	75	0.0732422	2466.8	86	14.5	95	73	350	277	10.6
3187	WORD	88	0.0859375	2744.8	86	1.4	62	68	160	255	1.75
3188	WORD	110	0.107422	2345.6	86	1.5	84	78	640	480	6.4
3189	EXCEL	78	0.0761719	720.7	83	1.7	74	78	372	255	1.75
3190	WORD	55	0.0537109	266.5	79	15.6	96	74	355	245	7.8
3191	WORD	1.2	1.2	2233.7	81	20	84	85	192	275	29
3192	EXCEL	90	0.0878906	800.6	91	35	81	77	470	277	15
3193	WORD	1.5	1.5	2145.6	93	4.4	98	75	160	266	29
3194	WORD	4.5	4.5	2280.1	86	3.3	87	53	340	230	96.78
3195	EXCEL	3.91	3.91	2333.7	81	23	86	84	191.5	266	29
3196	WORD	5.5	5.5	2233.7	81	20	84	85	192	275	29
3197	WORD	1.08	1.08	266.5	80	17	94	74	355	245	7.8
3198	EXCEL	2.22	2.22	321.4	89	9	91	75	265	190	190
3199	WORD	3.22	3.22	3020.4	86	1.2	95	73	420	210	1.66
3200	WORD	4.5	4.5	2280.1	86	3.3	87	53	340	230	96.78
3201	EXCEL	3.27	3.27	2750.6	85	18.6	98	78	406	277	8.2
3202	WORD	2.22	2.22	1900.4	83	3.2	97	81	429	195	3.6
3203	WORD	3.22	3.22	845.6	86	2.9	84	78	640	480	8
3204	EXCEL	4.5	4.5	720.7	85	3.2	76	78	372	255	3.5
3205	WORD	3.5	3.5	2300.1	23	1.8	24	42	350	260	334.1
3206	WORD	4.5	4.5	1460.3	88	7.1	96	73	220	135	13.67
3207	EXCEL	4.66	4.66	377.3	83	22.3	84	83	50	80	4
3208	WORD	3.5	3.5	1310.7	97	24.7	99	73	230	127	8.8
3209	WORD	1.6	1.6	845.6	86	2.9	84	78	640	480	8
3210	EXCEL	2.5	2.5	720.7	85	3.2	76	78	372	255	3.5
3211	WORD	4.6	4.6	2333.7	81	23	86	84	191.5	266	29
3212	WORD	5.5	5.5	3020.4	86	1.2	95	73	420	210	1.66
3213	EXCEL	6.91	6.91	2466.8	86	14.5	95	73	350	277	10.6
3214	WORD	7.44	7.44	2750.6	85	18.6	98	78	406	277	8.2
3215	WORD	1.6	1.6	2750.6	85	18.6	98	78	406	277	8.2
3216	EXCEL	3.91	3.91	4600.4	86	10.1	95	73	530	400	87.75
3217	WORD	4.53	4.53	845.6	86	2.9	84	78	640	480	8
3218	WORD	5.91	5.91	1200.4	79	2.5	92	83	429	195	4.2
3219	EXCEL	1.5	1.5	2750.6	85	18.6	98	78	406	277	8.2
3220	WORD	2.5	2.5	440.7	36	0.9	37	60	97	74	15.91
3221	WORD	2.5	2.5	1400	70	4.8	70	73	220	125	3.63
3222	EXCEL	3.6	3.6	1240	56	7.5	56	67	130	115	88.31
3223	WORD	6.6	6.6	377.3	83	22.3	84	83	50	80	4
3224	WORD	5.5	5.5	1100.8	69	9.7	70	73	195	120	44.75
3225	EXCEL	3.5	3.5	1520.7	85	9.4	95	67	250	135	6.66
3226	WORD	4.5	4.5	2850.6	91	8	89	72	238	183	190
3227	WORD	2.5	2.5	2421.4	81	23	86	84	191.5	266	29
3228	EXCEL	3.6	3.6	1700.1	93	4.4	98	73	160	250	26.75
3229	WORD	7.53	7.53	1222.4	89	7.1	90	73	240	180	187.75
3230	WORD	7.5	7.5	2245.6	81	20	84	85	192	275	29
3231	EXCEL	1.5	1.5	2566.8	91	5.9	97	79	165	245	28.2
3232	WORD	2.5	2.5	460	59	22	63	67	322	260	3.2
3233	WORD	3.5	3.5	1080	79	2.2	91	55	224	295	110.4
3234	EXCEL	2.91	2.91	1090	81	23	86	84	191.5	266	29
3235	WORD	7.22	7.22	433.7	126.17	98	12	100	67	80	70
3236	WORD	2.66	2.66	2466.8	107	87	1.9	95	73	75	65
3237	EXCEL	1.5	1.5	2266.5	140.2	91	15.3	97	67	88	90
3238	WORD	4.5	4.5	3740.3	120	96	13.5	99	67	74	150
3239	WORD	1.5	1.5	2740.6	95.4	86	6	86	73	66	60
3240	EXCEL	3.91	3.91	2145.6	133.2	80	2.3	80	53	83	153
3241	WORD	12.2	12.2	99.3	99.3	72	13.3	72	73	72	63
3242	WORD	5.66	5.66	56.4	154.9	71	3	72	83	94	155
3243	EXCEL	3.66	3.66	820	370.1	83	15.2	84	83	68	65
3244	WORD	5.2	5.2	105	102.7	46	3.8	47	78	75	67
3245	WORD	2.5	2.5	2333.7	760.7	91	7.9	97	73	149	115
3246	EXCEL	1.5	1.5	2266.5	170.5	77	8.8	78	67	100	160
3247	WORD	7.21	7.21	2321.4	115.9	18	4.3	18	60	75	70
3248	WORD	4.11	4.11	800.6	184.3	90	16.2	96	73	115	157
3249	EXCEL	645	0.629883	1024.6	149.6	88	1.7	96	53	90	150
3250	WORD	3.77	3.77	2345.6	198.6	19	4.4	20	60	130	79
3251	WORD	3.5	3.5	2145.6	114.9	88	21.2	96	73	74	69
3252	EXCEL	1.55	1.55	2433.7	110.4	77	4.7	78	73	72	65
3253	WORD	7.5	7.5	2145.6	420.3	72	12.9	72	83	55	82
3254	WORD	4.2	4.2	2333.7	750.8	100	12.1	100	80	166	92
3255	EXCEL	1.6	1.6	2333.7	88.4	98	1.2	100	73	45	50
3256	WORD	4.5	4.5	2166.5	820.4	100	1.4	100	67	130	95
3257	WORD	2.5	2.5	2650.6	650.8	85	1.1	95	60	140	96
3258	EXCEL	3.7	3.7	1200.3	98.3	87	2.6	95	60	145	63
3259	WORD	2.5	2.5	1690.2	48.5	99	1.5	100	67	45	44
3260	WORD	5.6	5.6	133.2	110.5	63	7.8	63	73	70	60
3261	EXCEL	2.66	2.66	99.3	90.6	91	15.9	97	73	135	61
3262	WORD	2.5	2.5	154.9	103.6	63	2.7	64	67	144	63
3263	WORD	1.66	1.66	370.1	118.9	71	2.1	71	73	160	66
3264	EXCEL	2.5	2.5	115.9	18	4.3	18	60	75	70	5.15
3265	WORD	4.6	4.6	184.3	90	16.2	96	73	115	157	24.13
3266	WORD	5.5	5.5	149.6	88	1.7	96	53	90	150	43.25
3267	EXCEL	6.91	6.91	198.6	19	4.4	20	60	130	79	5.91
3268	WORD	7.44	7.44	114.9	88	21.2	96	73	74	69	23
3269	WORD	1.6	1.6	110.4	77	4.7	78	73	72	65	269.25
3270	EXCEL	3.91	3.91	1100.7	71	8.4	72	73	185	110	6
3271	WORD	4.53	4.53	515.2	86	9.2	95	73	69	220	8.8
3272	WORD	5.91	5.91	420.3	72	12.9	72	83	55	82	4.5
3273	EXCEL	1.5	1.5	750.8	100	12.1	100	80	166	92	1
3274	WORD	2.5	2.5	88.4	98	1.2	100	73	45	50	8.2
3275	WORD	4.5	4.5	820.4	100	1.4	100	67	130	95	42.6
3276	EXCEL	5.6	5.6	650.8	85	1.1	95	60	140	96	47
3277	WORD	6.6	6.6	98.3	87	2.6	95	60	145	63	26
3278	WORD	5.5	5.5	48.5	99	1.5	100	67	45	44	35.2
3279	EXCEL	3.5	3.5	110.5	63	7.8	63	73	70	60	14.66
3280	WORD	4.5	4.5	90.6	91	15.9	97	73	135	61	5.4
3281	WORD	2.5	2.5	103.6	63	2.7	64	67	144	63	152
3282	EXCEL	3.6	3.6	118.9	71	2.1	71	73	160	66	2.37
3283	WORD	7.53	7.53	99.3	91	4.8	91	60	140	65	31.17
3284	WORD	7.5	7.5	56.4	43	4.4	43	73	95	41	14.85
3285	EXCEL	1.5	1.5	820	83	1.3	94	62	139	95	48
3286	WORD	2.5	2.5	105	65	3.2	66	65	150	64	152
3287	WORD	3.5	3.5	2333.7	81	23	86	84	191.5	266	29
3288	EXCEL	2.91	2.91	2266.5	79	15.6	96	74	355	245	7.8
3289	WORD	7.22	7.22	2321.4	89	7.1	90	73	240	180	187.75
3290	WORD	2.66	2.66	800.6	96	1.4	99	67	580	480	6.4
3291	EXCEL	1.5	1.5	1024.6	83	17	87.5	80	440	348	64
3292	WORD	4.5	4.5	2345.6	93	4.4	98	73	160	250	26.75
3293	WORD	1.5	1.5	2145.6	91	5.9	97	79	165	245	28.2
3294	EXCEL	3.91	3.91	2433.7	81	23	86	84	191.5	266	29
3295	WORD	12.2	12.2	2245.6	93	4.4	98	73	160	250	26.75
3296	WORD	7.66	7.66	2345.6	93	4.4	98	73	160	250	26.75
3297	EXCEL	3.66	3.66	2145.6	93	4.4	98	73	160	250	26.75
3298	WORD	5.2	5.2	2333.7	81	23	86	84	191.5	266	29
3299	WORD	2.5	2.5	2333.7	81	23	86	84	191.5	266	29
3300	EXCEL	1.5	1.5	2166.5	78	17	95	78	360	240	8.9
3301	WORD	7.21	7.21	2650.6	40	7	78	88	224	355	31
3302	WORD	4.11	4.11	1200.3	92	4.4	40	75	370	295	87.75
3303	EXCEL	645	645	1690.2	84	8.1	88	71	440	245	17
3304	WORD	3.77	3.77	2050.4	91.5	12	45	75	380	295	86.9
3305	WORD	3.5	3.5	2466.8	86	14.5	95	73	350	277	10.6
3306	EXCEL	1.55	1.55	266.5	79	15.6	96	74	355	245	7.8
3307	WORD	7.5	7.5	2321.4	89	7.1	90	73	240	180	187.75
3308	WORD	4.2	4.2	2166.5	75	16	93	75	650	233	7.8
3309	EXCEL	1.6	1.6	2840.6	91	8.1	63	74	320	250	40.84
3310	WORD	4.5	4.5	1800.6	91	23	82	75	470	277	10.6
3311	WORD	2.5	2.5	3640.3	73	36.3	86	73	470	420	1
3312	EXCEL	3.7	3.7	2322.4	86	8	89	72	238	183	190
3313	WORD	4.5	4.5	2333.7	78	23	86	84	191.5	266	29
3314	WORD	5.6	5.6	2333.7	81	23	86	84	191.5	266	29
3315	EXCEL	3.66	3.66	2333.7	81	23	86	84	191.5	266	29
3316	WORD	2.5	2.5	2466.8	86	14.5	95	73	350	277	10.6
3317	WORD	4.66	4.66	4145.2	92	3.3	91	78	450	390	15
3318	EXCEL	3.5	3.5	4720.7	81	1.7	95	85	192	275	29
3319	WORD	2.66	2.66	4420.7	91.5	19.7	86	83	190	270	31
3320	WORD	4.21	4.21	2233.7	81	20	84	85	192	275	29
3321	EXCEL	1.5	1.5	1333.7	81	23	86	84	191.5	266	29
3322	WORD	3.5	3.5	2466.8	86	14.5	95	73	350	277	10.6
3323	WORD	2.5	2.5	2744.8	86	1.4	62	68	160	255	1.75
3324	EXCEL	4.22	4.22	2345.6	86	1.5	84	78	640	480	6.4
3325	WORD	1.2	1.2	720.7	83	1.7	74	78	372	255	1.75
3326	WORD	2.91	2.91	266.5	79	15.6	96	74	355	245	7.8
3327	EXCEL	3.5	3.5	2233.7	81	20	84	85	192	275	29
3328	WORD	1.5	1.5	800.6	91	35	81	77	470	277	15
3329	WORD	4.2	4.2	2145.6	93	4.4	98	75	160	266	29
3330	EXCEL	5.5	5.5	2280.1	86	3.3	87	53	340	230	96.78
3331	WORD	3.66	3.66	2333.7	81	23	86	84	191.5	266	29
3332	WORD	4.66	4.66	2233.7	81	20	84	85	192	275	29
3333	EXCEL	3.5	3.5	266.5	80	17	94	74	355	245	7.8
3334	WORD	4.2	4.2	321.4	89	9	91	75	265	190	190
3335	WORD	3.66	3.66	3020.4	86	1.2	95	73	420	210	1.66
3336	EXCEL	5.2	5.2	140.2	91	15.3	97	67	88	90	0.93
3337	WORD	3.77	3.77	120	96	13.5	99	67	74	150	41.66
3338	WORD	1.55	1.55	95.4	86	6	86	73	66	60	1.5
3339	EXCEL	7.5	7.5	133.2	80	2.3	80	53	83	153	6.5
3340	WORD	240	0.234375	99.3	72	13.3	72	73	72	63	4
3341	WORD	320	0.3125	154.9	71	3	72	83	94	155	744
3342	EXCEL	66	0.0644531	370.1	83	15.2	84	83	68	65	3
3343	WORD	75	0.0732422	102.7	46	3.8	47	78	75	67	4.83
[truncated: 3,002 more rows]
