# Supplementary material for: Enhancing the e-learning system based on a novel tasks’ classification load-balancing algorithm
Source: PeerJ Comput Sci. 2021 Sep 9;7:e669. doi: 10.7717/peerj-cs.669 (PMC8444070; doi:10.7717/peerj-cs.669)
Supplement: Supplemental Information 4 [file peerj-cs-07-669-s004.xlsx]

## Sheet: students questionnaire
No	T1	T2	T3	T4	T5	T6	A1	A2	A3	A4	A5	A6	Conf1	Conf2	Conf3	Reliability1	Reliability2	Reliability3	Reliability4	Reliability5	FlexData1	FlexData2	FlexData3	FlexData4	EaseAcc1	EaseAcc2	EaseAcc3	EaseUSe1	EaseUSe2	EaseUSe3	Timeliness	Availability	Reliability	Flex Data	Confidence	Ease of Access	Ease of Use
1	5	5	5	5	5	5	4	5	5	4	5	4	4	5	5	5	4	4	4	4	4	4	5	5	5	5	5	5	4	4	5	4.5	4.2	4.5	4.66667	5	4.33333
2	5	5	5	5	5	5	4	5	5	4	5	4	4	5	5	4	4	4	4	4	4	4	5	5	5	5	5	5	4	4	5	4.5	4	4.5	4.66667	5	4.33333
3	5	5	5	5	5	5	4	5	5	4	5	4	4	5	5	4	4	4	4	4	5	4	5	5	5	5	5	5	4	4	5	4.5	4	4.75	4.66667	5	4.33333
4	5	5	5	5	5	5	4	5	5	4	5	4	4	5	5	5	4	5	4	4	5	4	5	5	5	5	5	5	5	5	5	4.5	4.4	4.75	4.66667	5	5
5	5	5	4	4	5	5	5	4	4	4	4	4	4	5	5	5	5	5	4	4	5	5	5	5	5	5	5	5	5	5	4.66667	4.16667	4.6	5	4.66667	5	5
6	5	5	4	4	5	5	4	4	4	4	4	4	4	5	5	5	5	5	4	4	5	5	5	5	5	5	5	5	5	5	4.66667	4	4.6	5	4.66667	5	5
7	5	5	4	4	5	5	4	4	4	4	4	5	4	5	5	5	5	5	4	4	5	5	5	5	5	5	5	5	5	5	4.66667	4.16667	4.6	5	4.66667	5	5
8	5	5	4	4	5	5	5	4	5	4	4	5	4	5	5	5	5	5	5	5	5	5	5	5	5	5	5	5	3	5	4.66667	4.5	5	5	4.66667	5	4.33333
9	5	5	4	5	5	5	5	5	5	4	4	5	5	5	5	5	5	5	5	5	5	5	5	5	5	5	5	5	5	5	4.83333	4.66667	5	5	5	5	5
10	5	5	4	5	5	5	5	5	5	4	4	5	5	5	5	5	5	5	5	5	5	5	5	5	5	5	5	5	5	5	4.83333	4.66667	5	5	5	5	5
11	5	5	5	5	5	5	5	5	5	4	4	5	5	5	5	5	5	5	5	5	5	5	5	5	5	5	5	5	5	5	5	4.66667	5	5	5	5	5
12	4	5	5	5	5	5	5	5	5	5	5	5	5	5	5	5	5	5	5	5	5	5	5	5	5	5	5	5	5	5	4.83333	5	5	5	5	5	5
13	5	5	4	5	5	5	5	5	5	5	5	5	5	5	5	5	5	5	5	5	5	5	5	5	5	5	5	5	5	5	4.83333	5	5	5	5	5	5
14	5	5	4	5	5	5	5	5	5	5	5	5	5	5	5	5	5	5	5	5	5	5	5	5	5	5	5	5	5	5	4.83333	5	5	5	5	5	5
15	5	5	5	5	5	5	5	5	5	5	5	5	5	5	5	5	5	5	5	5	5	5	5	5	5	5	5	5	5	5	5	5	5	5	5	5	5
16	5	5	4	5	5	5	5	5	5	5	5	5	5	5	5	5	5	4	5	5	4	5	4	4	5	5	4	4	4	5	4.83333	5	4.8	4.25	5	4.66667	4.33333
17	5	5	4	5	5	5	5	5	5	5	5	5	5	5	5	5	5	4	5	5	4	5	4	4	5	5	4	4	4	5	4.83333	5	4.8	4.25	5	4.66667	4.33333
18	3	5	5	5	5	5	5	5	5	5	5	5	5	5	5	5	5	4	5	5	4	5	4	4	5	5	5	4	5	5	4.66667	5	4.8	4.25	5	5	4.66667
19	5	5	4	5	5	5	5	5	5	5	5	5	5	4	4	5	5	5	4	4	4	4	4	4	5	5	5	5	4	4	4.83333	5	4.6	4	4.33333	5	4.33333
20	5	5	4	5	5	5	5	5	5	5	5	5	5	4	4	5	5	4	4	4	4	4	4	4	5	5	5	5	4	4	4.83333	5	4.4	4	4.33333	5	4.33333
21	4	3	4	5	5	4	5	5	5	5	5	4	5	4	4	5	5	4	4	4	4	4	5	4	5	5	5	5	4	4	4.16667	4.83333	4.4	4.25	4.33333	5	4.33333
22	5	5	5	5	5	4	5	5	5	5	5	4	5	4	4	5	5	5	4	5	4	4	5	4	5	5	5	5	4	4	4.83333	4.83333	4.8	4.25	4.33333	5	4.33333
23	4	4	4	5	5	4	5	5	5	5	5	5	5	4	5	5	5	5	5	5	4	4	5	5	5	5	5	5	5	5	4.33333	5	5	4.5	4.66667	5	5
24	5	5	5	5	5	5	5	5	5	5	5	5	5	4	5	5	5	5	5	5	4	4	5	5	5	5	5	5	5	5	5	5	5	4.5	4.66667	5	5
25	4	3	3	5	5	5	5	5	5	5	5	5	5	4	5	5	5	5	5	5	4	4	5	5	5	5	5	5	5	5	4.16667	5	5	4.5	4.66667	5	5
26	5	5	5	5	5	5	5	5	5	5	5	5	5	4	5	5	5	5	5	5	5	5	5	5	5	5	5	5	4	4	5	5	5	5	4.66667	5	4.33333
27	5	5	4	5	5	4	5	5	5	5	5	5	5	4	5	5	5	5	5	5	5	5	5	5	5	5	5	5	4	4	4.66667	5	5	5	4.66667	5	4.33333
28	5	5	5	5	5	4	5	5	5	5	5	5	5	4	5	5	5	5	5	5	5	5	5	5	5	5	5	5	4	4	4.83333	5	5	5	4.66667	5	4.33333
29	5	5	5	5	5	4	5	5	5	5	5	5	5	5	5	5	5	5	5	5	5	5	5	5	5	5	5	5	4	4	4.83333	5	5	5	5	5	4.33333
30	5	5	5	5	5	4	5	5	5	5	5	5	5	4	5	5	5	5	5	5	5	5	5	5	5	5	5	5	5	5	4.83333	5	5	5	4.66667	5	5
31	4	3	3	5	5	4	5	5	5	5	5	5	5	4	5	5	5	5	5	5	5	5	5	5	5	5	5	5	5	5	4	5	5	5	4.66667	5	5
32	5	4	4	5	5	4	5	5	5	5	5	5	5	5	5	5	5	5	5	5	5	5	5	5	5	5	5	5	5	5	4.5	5	5	5	5	5	5
33	2	3	3	5	5	3	5	5	5	5	5	5	5	5	5	5	4	5	5	5	5	5	5	5	5	5	5	5	3	5	3.5	5	4.8	5	5	5	4.33333
34	5	5	5	5	5	5	5	5	5	5	5	5	5	5	5	5	4	5	5	5	5	5	5	5	5	5	5	5	4	5	5	5	4.8	5	5	5	4.66667
35	4	5	5	5	5	4	5	5	5	5	5	5	5	5	5	5	5	5	5	5	5	5	5	5	5	5	5	5	5	5	4.66667	5	5	5	5	5	5
36	4	3	4+H37:H112	5	5	5	5	5	5	5	5	5	5	5	5	5	5	5	5	5	5	5	5	5	5	5	5	5	3	5	4.4	5	5	5	5	5	4.33333
37	3	3	4	5	5	4	5	5	5	5	5	5	5	5	5	5	5	5	5	5	5	5	5	5	5	5	5	5	3	5	4	5	5	5	5	5	4.33333
38	4	3	4	5	5	4	5	5	5	5	5	5	5	5	5	5	4	5	5	5	5	5	5	5	5	5	5	5	1	5	4.16667	5	4.8	5	5	5	3.66667
39	4	4	4	5	5	5	5	5	5	5	5	5	5	4	5	5	4	5	5	5	5	5	5	5	5	5	5	5	4	5	4.5	5	4.8	5	4.66667	5	4.66667
40	5	5	5	5	5	4	5	5	5	5	5	5	5	5	5	5	5	5	5	5	5	5	5	5	5	5	5	5	5	5	4.83333	5	5	5	5	5	5
41	5	4	4	5	5	5	5	5	5	5	5	5	5	4	4	5	4	5	5	5	5	5	5	5	5	5	5	5	3	5	4.66667	5	4.8	5	4.33333	5	4.33333
42	4	3	3	5	5	4	5	5	5	5	5	5	5	4	5	5	4	5	5	5	5	5	5	5	5	5	5	5	4	5	4	5	4.8	5	4.66667	5	4.66667
43	5	5	5	5	5	5	5	5	5	5	5	5	5	4	4	5	4	5	5	5	5	5	5	5	5	5	5	5	4	5	5	5	4.8	5	4.33333	5	4.66667
44	5	5	5	5	5	5	5	5	5	5	5	4	5	5	4	5	3	5	5	5	5	5	5	5	5	5	5	5	4	5	5	4.83333	4.6	5	4.66667	5	4.66667
45	5	5	5	5	5	5	5	5	5	5	5	5	5	5	5	5	5	5	5	5	5	5	5	5	5	5	5	5	3	5	5	5	5	5	5	5	4.33333
46	5	5	5	5	5	5	5	5	5	5	5	4	5	5	4	5	5	5	5	5	5	5	5	5	5	5	5	5	4	5	5	4.83333	5	5	4.66667	5	4.66667
47	5	5	5	5	5	5	5	5	5	5	5	5	5	5	5	5	5	5	5	5	5	5	5	5	5	5	5	5	4	5	5	5	5	5	5	5	4.66667
48	5	5	5	5	5	5	5	5	5	5	5	4	5	5	5	5	2	5	5	5	5	5	5	5	5	5	5	5	2	5	5	4.83333	4.4	5	5	5	4
49	5	5	5	5	5	5	5	5	5	5	5	4	5	5	5	5	5	5	5	5	5	5	5	5	5	5	5	5	5	5	5	4.83333	5	5	5	5	5
50	5	5	5	5	5	5	5	5	5	5	5	4	5	5	5	5	5	5	5	5	5	5	5	5	5	5	5	5	5	5	5	4.83333	5	5	5	5	5
51	5	5	5	5	5	5	5	5	5	5	5	5	5	5	5	5	3	5	5	5	5	5	5	5	5	5	5	5	5	5	5	5	4.6	5	5	5	5
52	5	5	5	5	5	5	5	5	5	5	5	5	5	5	5	5	4	5	5	5	5	5	5	5	5	5	5	5	5	5	5	5	4.8	5	5	5	5
53	5	5	5	5	5	5	5	5	5	5	5	4	5	5	5	5	5	4	5	5	5	5	5	5	5	5	5	5	5	5	5	4.83333	4.8	5	5	5	5
54	5	5	5	5	5	5	5	5	5	5	5	4	5	5	5	5	4	4	5	5	5	5	5	5	5	5	5	5	5	5	5	4.83333	4.6	5	5	5	5
55	5	5	5	5	5	5	5	5	5	5	5	5	5	5	5	5	5	4	5	5	5	5	5	5	5	5	5	5	5	5	5	5	4.8	5	5	5	5
56	5	5	5	5	5	5	3	4	5	5	5	2	5	5	5	5	4	3	5	5	5	5	5	5	5	5	5	5	4	4	5	4	4.4	5	5	5	4.33333
57	5	5	5	5	5	5	5	4	5	5	5	4	5	5	5	5	4	4	5	5	5	5	5	5	5	5	5	5	4	4	5	4.66667	4.6	5	5	5	4.33333
58	5	5	5	5	5	5	5	5	5	5	5	5	5	5	5	5	5	5	5	5	5	5	5	5	5	5	5	5	4	4	5	5	5	5	5	5	4.33333
59	4	4	3	5	5	4	4	4	5	5	5	4	5	5	5	5	4	2	5	5	5	5	5	5	5	5	5	5	4	4	4.16667	4.5	4.2	5	5	5	4.33333
60	5	5	5	5	5	5	5	4	5	5	5	5	5	5	5	5	4	4	5	5	5	5	5	5	5	5	5	5	4	4	5	4.83333	4.6	5	5	5	4.33333
61	4	4	4	5	5	5	4	5	5	5	5	5	5	5	5	5	5	2	5	5	5	5	5	5	5	5	5	5	4	4	4.5	4.83333	4.4	5	5	5	4.33333
62	5	5	5	5	5	5	5	5	5	5	5	5	5	5	5	5	4	4	5	5	5	5	5	5	5	5	5	4	4	4	5	5	4.6	5	5	5	4
63	5	5	5	5	5	5	5	5	5	5	5	5	5	5	5	5	5	4	5	5	5	5	5	5	5	5	5	4	4	4	5	5	4.8	5	5	5	4
64	5	5	4	5	5	5	5	5	5	5	5	5	5	5	5	5	5	5	5	5	5	5	5	5	5	5	5	4	4	5	4.83333	5	5	5	5	5	4.33333
65	5	5	5	5	5	5	5	4	4	4	5	5	5	5	5	5	4	4	5	5	5	5	5	5	5	5	5	4	4	5	5	4.5	4.6	5	5	5	4.33333
66	5	5	5	5	5	5	2	2	4	4	5	5	5	5	4	5	4	4	5	5	5	5	5	5	5	5	5	4	4	5	5	3.66667	4.6	5	4.66667	5	4.33333
67	5	5	5	5	5	5	5	5	5	5	5	5	5	5	1	5	4	4	5	5	5	5	5	5	2	5	5	4	4	5	5	5	4.6	5	3.66667	4	4.33333
68	5	5	5	5	5	5	5	5	5	5	5	5	5	5	5	5	2	2	5	5	5	5	5	5	4	5	5	4	4	5	5	5	3.8	5	5	4.66667	4.33333
69	5	5	5	5	5	5	5	5	5	5	5	5	5	5	5	5	4	5	5	5	5	5	5	5	3	5	5	4	4	5	5	5	4.8	5	5	4.33333	4.33333
70	5	5	5	5	5	5	5	5	5	5	5	5	5	5	5	5	5	5	5	5	5	5	5	5	4	5	5	5	5	5	5	5	5	5	5	4.66667	5
71	5	5	5	5	5	5	5	5	5	5	5	5	5	5	5	5	5	5	5	5	3	5	5	5	1	5	5	5	5	5	5	5	5	4.5	5	3.66667	5
72	5	5	5	5	5	5	5	5	5	5	5	5	5	5	5	5	5	5	5	5	3	5	5	5	3	5	5	5	5	5	5	5	5	4.5	5	4.33333	5
73	5	5	5	5	5	5	5	5	5	5	5	5	5	5	5	5	5	5	5	5	5	5	5	5	5	5	5	5	5	5	5	5	5	5	5	5	5
74	5	5	5	5	5	5	5	5	5	5	5	5	5	5	5	5	5	5	5	5	4	5	5	5	2	5	5	5	5	5	5	5	5	4.75	5	4	5
75	5	5	5	5	5	5	5	5	5	5	5	5	5	5	5	5	5	5	5	5	2	5	5	5	4	5	5	5	5	5	5	5	5	4.25	5	4.66667	5
76	5	5	5	5	5	5	5	5	5	5	5	5	5	5	5	5	5	5	5	5	5	5	5	5	4	5	5	5	2	5	5	5	5	5	5	4.66667	4
77	5	5	5	5	5	5	5	5	5	5	5	5	5	5	5	5	5	5	5	5	5	5	5	5	4	5	5	5	4	5	5	5	5	5	5	4.66667	4.66667
78	5	5	5	5	5	5	5	5	5	5	5	5	5	5	5	5	5	5	5	5	5	5	5	5	5	5	5	5	4	5	5	5	5	5	5	5	4.66667
79	5	5	5	5	5	5	5	5	5	5	5	5	5	5	5	5	5	5	5	5	5	5	5	5	4	5	5	5	4	5	5	5	5	5	5	4.66667	4.66667
80	5	5	5	5	5	5	5	5	5	5	5	5	5	5	5	5	5	5	5	5	5	5	5	5	5	5	5	5	2	5	5	5	5	5	5	5	4
81	5	5	5	5	5	5	5	5	5	5	5	5	5	5	5	5	5	5	5	5	5	5	5	5	5	5	5	5	3	5	5	5	5	5	5	5	4.33333
82	5	5	5	5	5	5	5	5	5	5	5	5	5	5	5	5	5	5	5	5	5	5	5	5	5	5	5	5	2	5	5	5	5	5	5	5	4
83	5	5	5	5	5	5	3	5	5	4	5	5	5	5	5	5	5	5	5	5	5	5	5	5	5	5	5	5	5	5	5	4.5	5	5	5	5	5
84	5	5	5	5	5	5	5	5	5	5	5	5	5	4	4	5	5	5	5	5	5	5	5	5	5	5	5	5	5	5	5	5	5	5	4.33333	5	5
85	5	5	5	5	5	5	4	5	5	3	5	5	5	5	4	5	5	5	5	5	5	5	5	5	5	5	5	5	5	5	5	4.5	5	5	4.66667	5	5
86	5	5	5	5	5	5	5	5	5	4	5	5	5	4	4	5	5	5	5	5	5	5	5	5	5	5	5	5	5	5	5	4.83333	5	5	4.33333	5	5
87	5	4	5	5	5	4	4	5	5	4	5	5	5	5	4	5	5	5	5	5	5	5	5	5	5	5	5	5	5	5	4.66667	4.66667	5	5	4.66667	5	5
88	4	4	3	5	5	4	4	5	5	4	5	5	5	5	4	5	5	5	5	5	5	5	5	5	5	5	5	5	5	5	4.16667	4.66667	5	5	4.66667	5	5
89	1	2	5	5	5	3	2	5	5	2	5	5	5	5	5	5	5	5	5	5	5	5	5	5	5	5	5	5	5	5	3.5	4	5	5	5	5	5
90	1	2	5	5	5	1	5	5	5	5	5	5	5	5	5	5	5	5	5	5	5	5	5	5	5	5	5	5	5	5	3.16667	5	5	5	5	5	5
91	5	5	5	5	5	5	5	5	5	5	5	5	5	5	5	5	5	5	5	5	5	5	5	5	5	5	5	5	5	5	5	5	5	5	5	5	5
92	4	5	5	5	5	4	5	5	5	5	5	5	5	5	5	5	5	5	5	5	5	5	5	5	5	5	5	5	5	5	4.66667	5	5	5	5	5	5
93	4	4	5	5	5	5	5	5	5	5	5	5	5	5	5	5	5	5	5	5	5	5	5	5	5	5	5	5	5	5	4.66667	5	5	5	5	5	5
94	1	2	5	5	5	4	5	5	5	5	5	5	5	5	5	5	5	5	5	5	5	5	5	5	5	5	5	5	5	5	3.66667	5	5	5	5	5	5
95	4	4	5	5	5	3	5	5	5	5	5	5	5	5	5	5	5	5	5	5	5	5	5	5	5	5	5	5	5	5	4.33333	5	5	5	5	5	5
96	1	2	5	5	5	2	5	5	5	5	5	5	5	5	5	5	5	5	5	5	5	5	5	5	5	5	5	5	5	5	3.33333	5	5	5	5	5	5
97	1	1	5	5	5	1	5	5	5	5	5	5	5	5	5	5	5	5	5	5	5	5	5	5	5	5	5	5	5	5	3	5	5	5	5	5	5
98	4	4	5	5	5	5	5	5	5	5	5	5	5	5	5	5	5	5	5	5	5	5	5	5	5	5	5	5	5	5	4.66667	5	5	5	5	5	5
99	1	2	5	5	5	1	5	5	5	5	5	5	5	5	5	5	5	5	5	5	5	5	5	5	5	5	5	5	5	5	3.16667	5	5	5	5	5	5
100	1	2	5	5	5	1	5	5	5	5	5	5	5	5	5	5	5	5	5	5	5	5	5	5	5	5	5	5	5	5	3.16667	5	5	5	5	5	5
101	4	2	5	5	5	2	5	5	5	5	5	5	5	5	5	5	5	5	5	5	5	5	5	5	5	5	5	5	5	5	3.83333	5	5	5	5	5	5
102	5	5	5	5	5	5	5	5	5	5	5	5	5	5	5	5	5	5	5	5	5	5	5	5	4	5	5	5	5	5	5	5	5	5	5	4.66667	5
103	5	5	5	5	5	5	5	5	5	5	5	5	5	5	5	5	5	5	5	5	5	5	5	5	5	5	5	5	1	5	5	5	5	5	5	5	3.66667
104	5	5	5	5	5	5	5	5	5	4	2	4	5	5	5	5	5	5	5	5	5	5	5	5	4	5	5	5	2	5	5	4.16667	5	5	5	4.66667	4
105	5	5	5	5	5	5	5	5	5	4	5	5	5	5	5	5	5	5	5	5	4	4	3	4	5	5	5	5	3	5	5	4.83333	5	3.75	5	5	4.33333
106	5	5	5	5	5	5	5	5	5	4	4	4	5	4	5	5	5	5	5	5	4	4	4	4	4	5	5	5	4	5	5	4.5	5	4	4.66667	4.66667	4.66667
107	5	5	5	5	5	5	5	5	5	4	4	4	5	4	5	5	5	5	5	5	4	4	4	5	4	5	5	5	4	5	5	4.5	5	4.25	4.66667	4.66667	4.66667
108	5	5	5	5	5	5	5	5	5	4	4	4	4	4	5	5	5	5	5	5	5	5	5	5	4	5	5	5	4	5	5	4.5	5	5	4.33333	4.66667	4.66667
109	5	5	5	5	5	5	5	5	5	4	4	5	4	4	5	5	5	5	5	5	5	5	5	5	4	5	4	5	4	5	5	4.66667	5	5	4.33333	4.33333	4.66667
110	5	5	5	5	5	5	5	5	5	4	4	5	4	4	5	5	5	5	5	5	5	5	5	5	4	5	4	5	4	5	5	4.66667	5	5	4.33333	4.33333	4.66667
111	5	5	5	5	5	5	5	5	5	4	4	5	4	4	5	5	5	5	5	5	5	5	5	5	4	5	4	5	5	5	5	4.66667	5	5	4.33333	4.33333	5
112	5	5	5	5	5	5	5	5	5	4	4	5	4	4	5	5	5	5	5	5	4	4	3	4	5	5	4	5	5	5	5	4.66667	5	3.75	4.33333	4.66667	5
113	5	5	5	5	5	5	5	5	5	4	4	5	4	4	5	5	5	5	5	5	4	4	4	4	5	5	5	5	5	5	5	4.66667	5	4	4.33333	5	5
114	5	5	5	5	5	5	5	5	5	4	4	5	4	5	5	5	5	5	5	5	4	4	5	4	5	5	5	5	5	5	5	4.66667	5	4.25	4.66667	5	5
115	5	5	5	5	5	5	5	5	5	4	3	5	4	5	5	5	5	5	5	5	5	5	5	4	5	5	5	5	5	5	5	4.5	5	4.75	4.66667	5	5
116	5	5	5	5	5	5	5	5	5	4	4	5	5	5	5	5	4	4	5	5	5	5	5	4	5	5	5	5	5	5	5	4.66667	4.6	4.75	5	5	5
117	5	5	5	5	5	5	5	5	5	4	4	5	5	5	5	5	4	4	5	5	5	5	5	4	5	5	5	5	5	5	5	4.66667	4.6	4.75	5	5	5
118	5	5	5	5	5	5	5	5	5	5	5	5	5	5	5	5	4	4	5	5	5	5	5	4	5	5	5	5	5	5	5	5	4.6	4.75	5	5	5
119	5	5	5	5	5	5	5	5	5	5	5	5	5	5	5	5	4	3	5	5	4	3	4	5	5	5	5	5	5	5	5	5	4.4	4	5	5	5
120	5	5	5	5	5	5	5	5	5	5	5	5	5	5	5	5	4	4	5	5	4	4	4	5	5	5	5	5	5	5	5	5	4.6	4.25	5	5	5
121	5	5	5	5	5	5	5	5	5	5	5	5	5	5	5	5	4	4	5	5	5	5	5	5	5	5	5	5	5	5	5	5	4.6	5	5	5	5
122	5	5	5	5	5	5	5	5	5	5	5	5	5	5	5	5	5	5	5	5	5	5	5	5	5	5	5	5	5	5	5	5	5	5	5	5	5
123	5	5	5	5	5	5	5	5	5	5	5	5	5	5	5	5	4	4	5	5	5	5	5	5	5	5	5	5	5	5	5	5	4.6	5	5	5	5
124	5	5	5	5	5	5	5	5	5	5	5	5	5	5	5	5	4	5	5	5	5	5	5	5	5	5	5	5	5	5	5	5	4.8	5	5	5	5
125	5	5	5	5	5	5	5	5	5	5	5	5	5	5	5	5	3	5	5	5	5	5	5	5	5	5	5	5	5	5	5	5	4.6	5	5	5	5
126	5	5	5	5	5	5	5	5	5	5	5	5	5	5	5	5	4	5	5	5	5	5	5	5	5	5	5	5	5	4	5	5	4.8	5	5	5	4.66667
127	5	5	5	5	5	5	5	5	5	5	5	5	5	5	5	5	4	5	5	5	5	5	5	5	5	5	5	5	5	4	5	5	4.8	5	5	5	4.66667
128	5	5	5	5	5	5	5	5	5	5	5	5	5	5	5	5	4	5	5	5	5	5	5	5	5	5	5	5	5	4	5	5	4.8	5	5	5	4.66667
129	5	5	5	5	5	5	5	4	5	5	5	5	5	5	5	5	3	5	5	5	5	5	5	5	5	5	5	5	5	4	5	4.83333	4.6	5	5	5	4.66667
130	5	5	5	5	5	5	5	4	5	5	5	5	4	5	5	5	5	5	5	5	5	5	5	5	5	5	5	5	5	4	5	4.83333	5	5	4.66667	5	4.66667
131	4	4	5	5	3	4	5	4	5	5	5	5	4	5	5	5	4	5	5	5	5	5	5	5	5	5	4	5	5	4	4.16667	4.83333	4.8	5	4.66667	4.66667	4.66667
132	5	4	5	5	5	4	5	4	5	5	5	5	5	5	5	5	4	5	5	5	5	5	5	5	5	5	4	5	5	3	4.66667	4.83333	4.8	5	5	4.66667	4.33333
133	5	5	5	5	5	5	5	4	5	5	5	5	4	5	5	5	4	5	5	5	5	5	5	5	5	5	2	5	5	4	5	4.83333	4.8	5	4.66667	4	4.66667
134	5	5	5	5	5	5	5	4	5	5	5	5	4	5	5	5	4	5	5	5	2	5	5	5	5	5	4	5	5	4	5	4.83333	4.8	4.25	4.66667	4.66667	4.66667
135	5	5	5	5	5	5	5	4	5	4	4	5	4	5	5	5	3	5	5	5	1	5	5	5	5	5	5	5	5	5	5	4.5	4.6	4	4.66667	5	5
136	5	5	5	5	5	5	5	4	5	4	4	5	4	5	5	5	4	5	5	5	2	5	5	5	5	5	4	5	5	3	5	4.5	4.8	4.25	4.66667	4.66667	4.33333
137	5	5	5	5	5	5	5	4	5	4	4	5	4	5	5	5	5	5	5	5	1	5	5	5	5	5	4	5	5	4	5	4.5	5	4	4.66667	4.66667	4.66667
138	4	3	5	5	4	3	5	5	5	5	5	5	4	5	5	5	5	5	5	5	2	5	5	5	5	5	4	5	5	2	4	5	5	4.25	4.66667	4.66667	4
139	5	4	5	5	5	4	5	5	5	5	5	5	4	5	5	5	5	5	5	5	5	5	5	5	5	5	3	5	5	4	4.66667	5	5	5	4.66667	4.33333	4.66667
140	4	4	5	5	4	4	5	5	5	5	5	5	4	5	5	5	5	5	5	5	5	5	5	5	5	5	4	5	5	3	4.33333	5	5	5	4.66667	4.66667	4.33333
141	4	3	5	5	4	4	5	5	5	5	5	5	4	5	5	5	4	5	5	5	5	5	5	5	5	5	4	5	5	2	4.16667	5	4.8	5	4.66667	4.66667	4
142	5	5	5	5	5	5	5	5	5	5	5	5	5	5	5	5	5	5	5	5	5	5	5	5	5	5	4	5	5	5	5	5	5	5	5	4.66667	5
143	5	5	5	5	5	5	5	5	5	5	5	5	5	5	5	5	4	5	5	5	5	5	5	5	5	5	5	5	5	5	5	5	4.8	5	5	5	5
144	5	5	5	5	5	5	5	5	5	5	5	5	5	5	5	5	4	5	5	5	5	5	5	5	5	5	3	5	5	5	5	5	4.8	5	5	4.33333	5
145	5	5	5	5	5	5	5	5	5	5	5	5	5	5	5	5	5	5	5	5	5	5	5	5	5	5	3	5	5	5	5	5	5	5	5	4.33333	5
146	5	5	5	5	5	5	5	5	5	5	5	5	5	5	5	5	4	5	5	5	5	5	4	5	5	5	4	5	5	5	5	5	4.8	4.75	5	4.66667	5
147	5	5	5	5	5	5	5	5	5	5	5	5	5	5	5	5	5	5	5	5	5	4	5	5	5	5	5	5	5	5	5	5	5	4.75	5	5	5
148	5	5	5	5	5	5	5	5	5	5	5	5	5	5	5	5	4	5	5	5	5	5	5	5	5	5	4	5	5	5	5	5	4.8	5	5	4.66667	5
149	5	5	5	5	5	5	5	5	5	5	5	5	5	5	5	5	4	5	5	5	5	5	5	5	5	5	3	5	5	5	5	5	4.8	5	5	4.33333	5
150	5	5	5	5	5	5	5	5	5	5	5	5	5	5	5	5	4	5	5	5	5	5	5	5	5	5	5	5	5	5	5	5	4.8	5	5	5	5
151	5	5	5	5	5	5	5	5	5	5	5	5	5	5	5	5	5	5	5	3	5	5	5	5	5	5	4	5	5	5	5	5	4.6	5	5	4.66667	5
152	5	5	5	5	5	5	5	5	5	5	5	5	5	5	5	5	4	5	5	4	5	5	5	5	5	5	3	5	5	5	5	5	4.6	5	5	4.33333	5
153	5	5	5	5	5	5	5	5	5	5	5	5	5	5	5	5	4	5	5	4	5	5	5	5	5	5	4	5	5	5	5	5	4.6	5	5	4.66667	5
154	5	5	5	5	5	5	5	5	5	5	5	4	5	5	5	5	5	5	5	4	5	5	5	5	5	5	4	5	5	5	5	4.83333	4.8	5	5	4.66667	5
155	5	5	5	5	5	5	5	5	5	5	5	5	5	5	5	5	5	5	5	5	5	5	5	5	5	5	5	5	5	5	5	5	5	5	5	5	5
156	5	5	5	5	5	5	5	5	5	5	5	3	5	5	4	5	5	5	5	3	5	5	5	5	5	5	3	5	5	5	5	4.66667	4.6	5	4.66667	4.33333	5
157	5	5	5	5	5	4	5	5	5	5	5	3	5	5	3	5	5	5	5	3	2	5	5	5	5	5	4	5	5	5	4.83333	4.66667	4.6	4.25	4.33333	4.66667	5
158	5	5	5	5	5	4	5	5	5	5	5	5	5	5	4	5	5	5	5	4	3	5	5	5	5	5	5	5	5	5	4.83333	5	4.8	4.5	4.66667	5	5
159	5	5	5	5	5	4	5	5	5	5	5	4	5	5	4	5	5	5	5	4	1	5	5	5	5	5	4	5	5	5	4.83333	4.83333	4.8	4	4.66667	4.66667	5
160	5	5	5	5	5	4	5	5	5	5	5	4	5	5	5	5	5	5	5	4	3	5	5	5	5	5	4	5	5	5	4.83333	4.83333	4.8	4.5	5	4.66667	5
161	5	5	3	5	5	4	5	5	5	5	5	4	5	5	4	5	5	5	5	5	1	5	5	5	5	5	4	5	5	5	4.5	4.83333	5	4	4.66667	4.66667	5
162	5	5	5	5	5	4	5	5	5	5	5	5	5	5	5	5	5	5	5	4	4	5	5	5	5	5	5	5	5	5	4.83333	5	4.8	4.75	5	5	5
163	5	5	5	5	5	4	5	5	5	5	5	4	5	5	5	5	5	5	5	4	1	5	5	5	5	5	3	5	5	5	4.83333	4.83333	4.8	4	5	4.33333	5
164	5	5	5	5	5	4	5	5	5	5	5	4	5	5	5	5	5	5	5	5	1	5	5	5	5	5	4	5	5	5	4.83333	4.83333	5	4	5	4.66667	5
165	5	5	5	5	3	4	5	5	5	5	5	5	5	5	5	5	5	5	5	4	1	5	5	5	5	5	4	5	5	5	4.5	5	4.8	4	5	4.66667	5
166	5	5	5	5	5	4	5	5	5	5	5	4	5	5	5	5	5	5	5	4	2	5	5	5	5	5	4	5	5	5	4.83333	4.83333	4.8	4.25	5	4.66667	5
167	5	5	5	5	5	4	5	5	5	5	5	5	5	5	5	5	5	5	5	4	2	5	5	5	5	5	5	5	5	4	4.83333	5	4.8	4.25	5	5	4.66667
168	5	5	5	5	5	5	5	5	5	5	5	5	5	5	5	5	5	5	5	5	2	5	5	5	5	5	5	5	5	4	5	5	5	4.25	5	5	4.66667
169	5	5	5	5	5	5	5	5	5	5	5	5	5	5	5	5	5	5	5	5	3	5	5	5	5	5	5	5	5	3	5	5	5	4.5	5	5	4.33333
170	5	5	5	5	5	5	5	5	5	5	5	5	5	5	5	5	5	5	5	5	2	5	5	5	5	5	5	5	5	3	5	5	5	4.25	5	5	4.33333
171	5	5	5	5	5	5	5	5	5	5	5	5	5	5	5	5	4	5	5	5	1	5	5	5	5	5	5	5	5	4	5	5	4.8	4	5	5	4.66667
172	5	5	5	5	5	5	5	5	5	5	5	5	5	5	5	5	5	5	5	5	5	5	5	5	5	5	5	5	5	4	5	5	5	5	5	5	4.66667
173	5	5	5	5	5	5	5	5	5	5	5	5	5	5	5	5	4	5	5	5	5	5	5	5	5	5	5	5	5	3	5	5	4.8	5	5	5	4.33333
174	5	5	5	5	5	5	5	5	5	5	5	5	5	5	5	5	4	5	5	5	5	5	1	1	5	5	5	5	5	3	5	5	4.8	3	5	5	4.33333
175	5	5	5	5	5	5	5	5	5	5	5	5	5	4	5	5	2	5	5	5	5	5	2	4	5	5	5	5	5	4	5	5	4.4	4	4.66667	5	4.66667
176	5	5	3	5	5	5	5	5	5	5	5	5	5	5	3	5	3	5	5	5	5	5	4	3	5	5	5	3	5	4	4.66667	5	4.6	4.25	4.33333	5	4
177	5	5	5	5	5	5	4	4	4	4	4	5	5	5	4	5	4	5	5	5	5	5	4	4	5	5	5	2	5	4	5	4.16667	4.8	4.5	4.66667	5	3.66667
178	5	5	5	5	5	5	5	5	5	5	4	5	5	5	5	5	4	5	5	5	5	5	4	4	5	5	5	5	5	5	5	4.83333	4.8	4.5	5	5	5
179	5	5	5	5	5	5	4	4	4	4	4	5	5	5	4	5	4	5	5	4	5	5	2	2	5	5	5	4	5	2	5	4.16667	4.6	3.5	4.66667	5	3.66667
180	5	5	5	5	5	5	2	4	4	3	4	5	5	5	3	5	4	5	5	4	5	5	3	3	5	5	5	4	5	4	5	3.66667	4.6	4	4.33333	5	4.33333
181	5	5	5	5	5	5	5	4	4	4	4	5	5	5	5	5	5	5	5	5	4	4	5	4	5	5	5	3	5	4	5	4.33333	5	4.25	5	5	4
182	5	5	5	5	5	5	5	5	5	4	4	5	5	5	4	5	2	5	5	4	2	2	4	1	5	5	5	4	5	4	5	4.66667	4.2	2.25	4.66667	5	4.33333
183	5	5	5	5	5	5	5	5	5	5	4	5	5	5	5	5	4	5	5	4	3	3	1	1	5	5	5	3	5	4	5	4.83333	4.6	2	5	5	4
184	5	5	5	5	5	5	5	5	5	3	3	5	5	5	5	5	5	5	5	5	5	4	2	3	5	5	5	3	5	3	5	4.33333	5	3.5	5	5	3.66667
185	5	5	5	5	5	5	5	5	5	5	4	5	5	5	4	5	4	5	5	4	4	1	4	4	5	5	5	1	5	4	5	4.83333	4.6	3.25	4.66667	5	3.33333
186	5	5	5	5	5	4	5	5	5	4	5	5	5	5	5	5	5	5	5	5	5	5	5	4	5	5	5	4	5	4	4.83333	4.83333	5	4.75	5	5	4.33333
187	5	4	4	5	4	3	5	5	5	3	5	5	5	5	3	5	3	5	5	3	5	5	2	2	5	5	5	4	5	3	4.16667	4.66667	4.2	3.5	4.33333	5	4
188	5	5	4	5	5	4	5	5	5	4	5	5	5	5	5	5	3	5	5	4	4	5	3	1	5	5	5	5	5	5	4.66667	4.83333	4.4	3.25	5	5	5
189	5	2	4	5	5	5	5	5	5	5	5	5	5	5	5	5	5	5	5	5	5	4	1	1	5	5	5	3	5	4	4.33333	5	5	2.75	5	5	4
190	5	2	2	5	4	4	5	5	5	4	4	5	5	5	5	5	5	5	5	4	5	5	2	1	5	5	5	3	5	2	3.66667	4.66667	4.8	3.25	5	5	3.33333
191	5	5	5	5	5	5	5	5	5	4	4	5	5	5	5	5	2	5	5	2	5	5	1	1	5	5	5	4	5	2	5	4.66667	3.8	3	5	5	3.66667
192	5	5	5	5	5	5	5	5	5	5	4	4	5	5	5	5	2	5	5	3	5	5	2	2	5	5	5	2	5	2	5	4.66667	4	3.5	5	5	3
193	5	5	5	5	5	5	5	5	5	2	1	4	5	5	5	5	4	5	5	4	5	5	4	4	5	5	5	5	5	4	5	3.66667	4.6	4.5	5	5	4.66667
194	5	5	5	5	5	5	5	5	5	4	5	4	5	5	5	5	5	5	5	4	5	5	2	2	5	5	5	2	5	2	5	4.66667	4.8	3.5	5	5	3
195	5	5	5	5	5	5	5	5	5	4	3	5	5	5	5	5	5	5	5	3	5	5	4	3	5	5	5	4	5	4	5	4.5	4.6	4.25	5	5	4.33333
196	5	5	5	5	5	5	4	5	5	2	4	4	5	5	5	5	2	5	5	1	5	5	1	1	5	5	5	4	5	4	5	4	3.6	3	5	5	4.33333
197	5	5	5	5	5	5	1	5	5	1	1	1	5	5	5	5	5	5	5	5	5	5	5	4	5	5	5	3	5	2	5	2.33333	5	4.75	5	5	3.33333
198	5	5	5	5	5	5	3	5	5	4	5	4	5	5	5	5	4	5	5	4	5	5	2	1	5	5	5	3	5	4	5	4.33333	4.6	3.25	5	5	4
199	5	5	5	5	5	5	5	5	5	5	5	5	5	5	5	5	1	5	5	5	5	5	1	1	5	5	5	1	5	3	5	5	4.2	3	5	5	3
200	5	5	5	5	5	5	5	5	5	5	5	5	5	5	5	5	4	5	5	3	5	5	3	3	5	5	5	1	5	3	5	5	4.4	4	5	5	3
201	5	5	5	5	5	5	5	5	5	5	5	5	5	5	5	5	4	3	5	3	5	5	1	2	5	5	5	4	5	4	5	5	4	3.25	5	5	4.33333
202	5	5	5	5	5	5	5	5	5	5	5	5	4	5	5	2	2	2	5	2	5	5	2	2	5	5	5	4	5	4	5	5	2.6	3.5	4.66667	5	4.33333
203	5	5	5	5	5	5	5	5	5	5	5	5	5	5	5	5	5	4	5	5	5	5	1	4	5	5	5	5	5	3	5	5	4.8	3.75	5	5	4.33333
204	5	5	5	5	5	5	5	5	5	5	5	5	2	2	1	4	4	4	5	4	5	5	4	2	5	5	5	4	5	4	5	5	4.2	4	1.66667	5	4.33333
205	5	5	5	5	5	5	5	5	5	5	5	5	4	2	2	2	2	2	5	2	5	5	2	2	5	5	5	1	5	2	5	5	2.6	3.5	2.66667	5	2.66667
206	5	5	5	5	5	5	5	5	5	5	5	5	5	5	5	2	2	2	5	3	5	5	5	5	5	5	5	5	5	5	5	5	2.8	5	5	5	5
207	5	5	5	5	5	5	5	5	5	5	5	5	4	5	3	4	5	4	5	5	5	5	3	5	5	5	5	4	5	5	5	5	4.6	4.5	4	5	4.66667
208	5	4	3	5	3	3	5	5	5	5	5	5	3	2	3	2	3	3	5	2	5	5	3	4	5	5	5	3	5	5	3.83333	5	3	4.25	2.66667	5	4.33333
209	5	5	3	5	5	4	5	5	5	5	5	5	5	5	5	4	5	4	5	4	5	5	5	5	5	5	5	2	5	5	4.5	5	4.4	5	5	5	4
210	5	4	3	5	5	5	5	5	5	5	5	5	2	2	3	3	4	4	5	3	5	5	4	1	5	5	5	1	5	5	4.5	5	3.8	3.75	2.33333	5	3.66667
211	5	4	4	5	4	4	5	5	5	5	5	5	3	2	2	4	4	4	5	4	5	5	4	4	5	5	5	2	5	5	4.33333	5	4.2	4.5	2.33333	5	4
212	5	3	2	5	5	4	5	5	5	5	5	5	4	5	3	4	5	3	5	3	5	5	2	3	5	5	5	3	5	5	4	5	4	3.75	4	5	4.33333
213	5	5	5	5	5	5	5	4	3	5	3	5	5	1	2	5	5	4	5	4	5	5	5	5	5	5	5	4	5	5	5	4.16667	4.6	5	2.66667	5	4.66667
214	5	5	5	4	5	5	2	2	2	5	2	5	5	2	2	5	5	4	5	5	5	5	5	5	5	5	5	3	5	5	4.83333	3	4.8	5	3	5	4.33333
215	5	5	5	5	5	5	5	5	4	5	5	5	5	1	4	5	5	4	5	5	4	4	5	5	5	5	5	4	5	5	5	4.83333	4.8	4.5	3.33333	5	4.66667
216	5	5	5	2	2	1	4	4	4	5	4	5	5	4	2	5	5	4	5	5	5	5	5	5	5	5	5	3	5	5	3.33333	4.33333	4.8	5	3.66667	5	4.33333
217	5	5	5	4	2	2	2	2	2	5	2	5	5	2	2	5	5	3	5	5	5	4	4	5	5	5	5	4	5	5	3.83333	3	4.6	4.5	3	5	4.66667
218	5	5	5	5	5	5	2	2	2	5	3	5	5	5	5	5	5	5	5	4	5	5	5	5	5	5	5	5	5	5	5	3.16667	4.8	5	5	5	5
219	5	5	5	4	5	3	4	5	4	5	5	5	5	3	5	5	5	4	5	5	5	5	5	5	5	5	5	5	5	5	4.5	4.66667	4.8	5	4.33333	5	5
220	5	5	5	3	2	3	2	3	3	5	2	5	5	3	4	5	5	4	5	5	5	5	5	5	5	5	5	5	5	5	3.83333	3.33333	4.8	5	4	5	5
221	5	5	5	5	5	5	4	5	4	5	4	5	5	5	5	5	5	5	5	5	5	5	5	5	5	5	5	5	5	5	5	4.5	5	5	5	5	5
222	2	5	5	2	2	3	3	4	4	5	3	5	5	4	1	5	5	5	5	5	5	4	4	5	5	3	4	5	5	5	3.16667	4	5	4.5	3.33333	4	5
223	5	5	5	3	2	2	4	4	4	5	4	5	5	4	4	5	5	5	5	5	4	5	5	5	5	5	4	5	5	5	3.66667	4.33333	5	4.75	4.33333	4.66667	5
224	5	5	5	4	5	3	4	5	3	5	3	5	5	2	3	5	5	5	5	5	5	5	5	5	5	4	5	5	5	5	4.5	4.16667	5	5	3.33333	4.66667	5
225	3	5	5	4	4	4	4	4	4	5	4	5	5	5	5	5	5	3	5	5	5	4	5	5	5	5	5	5	5	5	4.16667	4.33333	4.6	4.75	5	5	5
226	5	5	5	4	4	4	4	4	4	5	5	5	5	5	5	5	5	5	5	5	5	5	5	5	5	5	5	5	5	5	4.5	4.5	5	5	5	5	5
227	5	5	5	4	4	4	3	4	4	5	5	4	4	5	5	5	5	5	5	5	5	5	5	5	5	5	5	5	5	5	4.5	4.16667	5	5	4.66667	5	5
228	5	5	5	4	4	4	4	4	4	5	5	5	5	5	5	5	5	5	5	5	5	5	5	5	5	5	5	5	4	5	4.5	4.5	5	5	5	5	4.66667
229	5	5	5	4	4	4	4	4	3	5	5	5	4	4	5	5	5	5	5	5	4	5	5	5	5	5	5	5	4	5	4.5	4.33333	5	4.75	4.33333	5	4.66667
230	5	5	5	5	5	5	5	5	5	5	4	5	5	5	5	5	5	5	5	5	5	5	5	5	5	5	5	5	4	5	5	4.83333	5	5	5	5	4.66667
231	5	5	5	5	4	5	4	5	5	5	5	5	5	5	5	5	5	5	5	5	5	5	5	5	5	5	5	5	5	5	4.83333	4.83333	5	5	5	5	5
232	2	5	5	5	5	5	5	5	5	4	4	4	5	5	4	5	5	5	5	5	5	5	5	5	5	5	5	5	4	4	4.5	4.5	5	5	4.66667	5	4.33333
233	5	5	5	5	5	5	5	5	5	5	5	4	5	4	5	5	5	5	5	5	5	5	5	5	5	5	5	5	5	4	5	4.83333	5	5	4.66667	5	4.66667
234	5	4	4	5	4	5	5	5	5	5	5	4	5	5	5	5	5	5	5	5	5	5	5	5	5	5	5	5	4	5	4.5	4.83333	5	5	5	5	4.66667
235	4	3	3	5	3	4	5	5	4	4	4	4	4	5	3	5	5	5	5	5	5	5	5	5	5	5	5	5	2	4	3.66667	4.33333	5	5	4	5	3.66667
236	5	3	4	5	4	4	4	3	4	4	4	4	4	5	5	5	2	2	5	5	1	5	5	5	5	5	4	5	3	5	4.16667	3.83333	3.8	4	4.66667	4.66667	4.33333
237	5	5	5	5	5	5	4	5	5	4	5	4	4	5	5	5	4	4	4	4	4	4	5	5	5	5	5	5	4	4	5	4.5	4.2	4.5	4.66667	5	4.33333
238	5	5	5	5	5	5	4	5	5	4	5	4	4	5	5	4	4	4	4	4	4	4	5	5	5	5	5	5	4	4	5	4.5	4	4.5	4.66667	5	4.33333
239	5	5	5	5	5	5	4	5	5	4	5	4	4	5	5	4	4	4	4	4	5	4	5	5	5	5	5	5	4	4	5	4.5	4	4.75	4.66667	5	4.33333
240	5	5	5	5	5	5	4	5	5	4	5	4	4	5	5	5	4	5	4	4	5	4	5	5	5	5	5	5	5	5	5	4.5	4.4	4.75	4.66667	5	5
241	5	5	5	5	5	5	4	5	5	4	5	4	5	5	5	5	5	5	4	4	5	5	5	5	5	5	5	5	5	5	5	4.5	4.6	5	5	5	5
242	5	5	5	5	5	5	4	5	5	4	5	4	5	5	5	5	5	5	4	4	5	5	5	5	5	5	5	5	5	5	5	4.5	4.6	5	5	5	5
243	5	5	5	5	5	5	4	5	5	4	5	4	5	5	5	5	5	5	4	4	5	5	5	5	5	5	5	5	5	5	5	4.5	4.6	5	5	5	5
244	5	5	5	5	5	5	4	5	5	4	5	4	5	5	5	5	5	5	5	5	5	5	5	5	5	5	5	5	3	5	5	4.5	5	5	5	5	4.33333
245	5	5	5	5	5	5	4	5	5	4	5	4	5	5	5	5	5	5	5	5	5	5	5	5	5	5	5	5	5	5	5	4.5	5	5	5	5	5
246	5	5	5	3	5	5	4	5	5	4	5	4	5	5	5	5	5	5	5	5	5	5	5	5	5	5	5	5	5	5	4.66667	4.5	5	5	5	5	5
247	5	5	5	5	5	5	4	5	5	4	5	5	5	5	5	5	5	5	5	5	5	5	5	5	5	5	5	5	5	5	5	4.66667	5	5	5	5	5
248	4	3	3	5	4	4	5	5	5	5	5	4	5	5	5	5	5	5	5	5	5	5	5	5	5	5	5	5	5	5	3.83333	4.83333	5	5	5	5	5
249	5	5	5	5	5	5	5	5	5	5	5	4	5	5	5	5	5	5	5	5	5	5	5	5	5	5	5	5	5	5	5	4.83333	5	5	5	5	5
250	5	5	5	5	5	5	5	5	5	5	5	5	5	5	5	5	5	5	5	5	5	5	5	5	5	5	5	5	5	5	5	5	5	5	5	5	5
251	5	5	5	5	5	5	5	5	5	5	5	4	5	5	5	5	5	5	5	5	5	5	5	5	5	5	5	5	5	5	5	4.83333	5	5	5	5	5
252	5	5	5	5	5	5	5	5	5	5	5	4	5	5	5	5	5	5	5	5	5	5	5	5	5	5	5	5	5	5	5	4.83333	5	5	5	5	5
253	5	5	5	5	5	5	5	5	5	5	5	4	5	5	5	5	5	5	5	5	5	5	5	5	5	5	5	5	5	5	5	4.83333	5	5	5	5	5
254	3	3	4	2	5	4	5	5	5	5	5	4	5	5	5	4	5	5	5	5	5	5	5	5	5	5	5	5	5	5	3.5	4.83333	4.8	5	5	5	5
255	5	5	5	5	5	5	5	5	5	5	5	4	5	5	5	4	5	5	5	5	5	5	5	5	5	5	4	5	5	5	5	4.83333	4.8	5	5	4.66667	5
256	5	5	5	5	5	5	5	5	5	5	5	5	5	5	5	4	5	5	5	5	5	5	5	5	5	5	4	5	5	5	5	5	4.8	5	5	4.66667	5
257	4	3	4	5	5	4	5	5	5	5	5	4	4	5	5	4	5	5	5	5	5	5	5	5	5	5	4	5	5	5	4.16667	4.83333	4.8	5	4.66667	4.66667	5
258	5	5	5	5	5	4	5	5	5	5	5	4	4	5	5	4	5	5	5	5	5	5	5	5	5	5	5	5	5	5	4.83333	4.83333	4.8	5	4.66667	5	5
259	4	4	4	5	5	4	5	5	5	5	5	5	4	5	5	4	5	5	5	5	5	5	5	5	5	5	4	5	5	5	4.33333	5	4.8	5	4.66667	4.66667	5
260	5	5	5	5	5	5	5	5	5	5	5	5	5	5	5	4	5	5	5	5	5	5	5	5	5	5	4	5	5	5	5	5	4.8	5	5	4.66667	5
261	4	3	3	5	5	5	5	5	5	5	5	5	5	5	5	5	5	5	5	5	5	5	5	5	5	5	5	5	5	5	4.16667	5	5	5	5	5	5
262	5	5	5	5	5	5	5	5	5	5	5	5	5	5	5	5	5	5	5	5	5	5	5	5	5	5	5	5	5	5	5	5	5	5	5	5	5
263	5	5	4	5	5	4	5	5	5	5	5	5	5	5	5	5	5	5	5	5	5	5	5	5	5	5	5	5	5	5	4.66667	5	5	5	5	5	5
264	5	5	5	5	5	4	5	5	5	5	5	5	5	5	5	5	5	5	5	5	5	5	5	5	5	5	5	5	5	5	4.83333	5	5	5	5	5	5
265	5	5	5	5	5	4	5	5	5	5	5	5	5	5	5	5	5	5	5	5	5	5	5	5	5	5	5	5	5	5	4.83333	5	5	5	5	5	5
266	5	5	5	5	5	4	5	5	5	5	5	5	5	5	5	5	5	5	5	5	5	5	5	5	5	5	5	5	5	5	4.83333	5	5	5	5	5	5
267	4	3	3	5	5	4	5	5	5	5	5	5	5	5	5	5	5	5	5	5	5	5	5	5	5	5	5	5	4	5	4	5	5	5	5	5	4.66667
268	5	4	4	5	5	4	5	5	5	5	5	5	5	5	5	5	5	5	5	5	5	5	5	5	5	5	5	5	4	5	4.5	5	5	5	5	5	4.66667
269	2	3	3	5	5	3	5	5	5	5	5	5	5	5	5	5	4	5	5	5	5	5	5	5	5	5	5	5	3	5	3.5	5	4.8	5	5	5	4.33333
270	5	5	5	5	5	5	5	4	4	5	5	5	4	4	4	4	4	4	5	5	5	5	5	5	5	5	5	5	4	5	5	4.66667	4.4	5	4	5	4.66667
271	4	5	5	5	5	4	5	4	4	5	5	4	4	4	4	4	4	4	5	5	5	5	5	5	5	5	5	5	5	5	4.66667	4.5	4.4	5	4	5	5
272	4	3	5	5	5	5	5	4	4	5	5	4	4	4	4	4	5	4	5	5	5	5	5	5	5	5	5	5	3	5	4.5	4.5	4.6	5	4	5	4.33333
273	3	3	4	5	5	4	5	4	4	5	5	5	4	5	4	4	5	4	5	5	5	5	5	5	5	5	5	5	3	5	4	4.66667	4.6	5	4.33333	5	4.33333
274	4	3	4	5	5	4	4	4	4	5	5	5	5	5	4	4	5	5	5	5	5	5	5	5	5	5	5	5	1	5	4.16667	4.5	4.8	5	4.66667	5	3.66667
275	4	4	4	5	5	5	4	4	4	5	5	5	5	5	4	4	5	5	5	5	5	5	5	5	5	5	5	5	4	5	4.5	4.5	4.8	5	4.66667	5	4.66667
276	5	5	5	5	5	4	4	5	4	5	5	5	5	5	4	4	5	5	5	5	5	5	5	5	5	5	5	5	5	5	4.83333	4.66667	4.8	5	4.66667	5	5
277	5	4	4	5	5	5	4	5	4	5	5	5	5	5	5	5	5	5	5	5	5	5	5	5	5	5	5	5	3	5	4.66667	4.66667	5	5	5	5	4.33333
278	4	3	3	5	5	4	4	5	5	5	5	5	5	5	5	5	5	5	5	5	5	5	5	5	5	5	5	5	4	5	4	4.83333	5	5	5	5	4.66667
279	5	5	5	5	5	5	4	5	5	5	5	5	5	5	5	5	5	5	5	5	5	5	5	5	5	5	5	5	4	5	5	4.83333	5	5	5	5	4.66667
280	5	5	5	5	5	5	4	5	5	5	5	5	5	5	5	5	5	5	5	5	5	5	5	5	5	5	5	5	4	5	5	4.83333	5	5	5	5	4.66667
281	5	5	5	5	5	5	5	5	5	5	5	5	5	5	5	5	5	5	5	5	5	5	5	5	5	5	5	5	3	5	5	5	5	5	5	5	4.33333
282	5	5	5	5	5	5	5	5	5	5	5	5	5	5	5	5	5	5	5	5	5	5	5	5	5	5	5	5	4	5	5	5	5	5	5	5	4.66667
283	5	5	5	5	5	5	5	5	5	5	5	5	5	5	5	5	5	5	5	5	5	5	5	5	5	5	5	5	4	5	5	5	5	5	5	5	4.66667
284	5	5	5	5	5	5	5	5	5	5	5	5	5	5	5	5	5	5	5	5	5	5	5	5	5	5	5	5	2	5	5	5	5	5	5	5	4
285	5	5	5	5	5	5	5	5	5	5	5	5	5	5	5	5	5	5	5	5	5	5	5	5	5	5	5	5	5	5	5	5	5	5	5	5	5
286	5	5	5	5	5	5	5	5	5	5	5	4	5	5	5	5	5	5	5	5	5	5	5	5	5	5	5	5	5	5	5	4.83333	5	5	5	5	5
287	5	5	5	5	5	5	5	5	5	5	5	5	5	5	5	5	3	5	5	5	5	5	5	5	5	5	5	5	5	5	5	5	4.6	5	5	5	5
288	5	5	5	5	5	5	5	5	5	5	5	5	5	5	5	5	4	5	5	5	5	5	5	5	5	5	5	5	5	5	5	5	4.8	5	5	5	5
289	5	5	5	5	5	5	5	5	5	5	5	4	5	5	5	5	5	4	5	5	5	5	5	5	5	5	5	5	5	5	5	4.83333	4.8	5	5	5	5
290	5	5	5	5	5	5	5	5	5	5	5	4	5	5	5	5	4	4	5	5	5	5	5	5	5	5	5	5	5	5	5	4.83333	4.6	5	5	5	5
291	5	5	5	5	5	5	5	5	5	5	5	5	5	5	5	5	5	4	5	5	5	5	5	5	5	5	5	5	5	5	5	5	4.8	5	5	5	5
292	5	5	5	5	5	5	3	4	5	5	5	2	5	5	5	5	4	3	5	5	5	5	5	5	5	5	5	5	5	5	5	4	4.4	5	5	5	5
293	5	5	5	5	5	5	5	4	5	5	5	4	5	5	5	5	4	4	5	5	5	5	5	5	5	5	5	5	5	5	5	4.66667	4.6	5	5	5	5
294	5	5	5	5	5	5	5	5	5	5	5	5	5	5	5	5	5	5	5	5	5	5	5	5	5	5	5	5	5	5	5	5	5	5	5	5	5
295	4	4	3	5	5	4	4	4	5	5	5	4	5	5	5	5	4	2	5	5	5	5	5	5	5	5	5	5	5	5	4.16667	4.5	4.2	5	5	5	5
296	5	5	5	5	5	5	5	4	5	5	5	5	5	5	5	5	4	4	5	5	5	5	5	5	5	5	5	5	5	5	5	4.83333	4.6	5	5	5	5
297	4	4	4	5	5	5	4	5	5	5	5	5	5	5	5	5	5	2	5	5	5	5	5	5	5	5	5	5	5	5	4.5	4.83333	4.4	5	5	5	5
298	5	5	5	5	5	5	5	5	5	5	5	5	5	5	5	5	4	4	5	5	5	5	5	5	5	5	5	5	5	5	5	5	4.6	5	5	5	5
299	5	5	5	5	5	5	5	5	5	5	5	5	5	5	5	5	5	4	5	5	5	5	5	5	5	5	5	5	5	5	5	5	4.8	5	5	5	5
300	5	5	4	5	5	5	5	5	5	5	5	5	5	5	5	5	5	5	5	5	5	5	5	5	5	5	5	5	5	5	4.83333	5	5	5	5	5	5
301	5	5	5	5	5	5	5	4	4	4	5	5	5	5	5	5	4	4	5	5	5	5	5	5	5	5	5	5	5	5	5	4.5	4.6	5	5	5	5
302	5	5	5	5	5	5	2	2	4	4	5	5	5	5	4	5	4	4	5	5	5	5	5	5	5	5	5	5	5	5	5	3.66667	4.6	5	4.66667	5	5
303	5	5	5	5	5	5	5	5	5	5	5	5	5	5	1	5	4	4	5	5	5	5	5	5	2	5	5	5	5	5	5	5	4.6	5	3.66667	4	5
304	5	5	5	5	5	5	5	5	5	5	5	5	5	5	5	5	2	2	5	5	5	5	5	5	4	5	5	5	5	5	5	5	3.8	5	5	4.66667	5
305	5	5	5	5	5	5	5	5	5	5	5	5	5	5	5	5	4	5	5	5	5	5	5	5	3	5	5	5	5	5	5	5	4.8	5	5	4.33333	5
306	5	5	5	5	5	5	5	5	5	5	5	5	5	5	5	5	5	5	5	5	5	5	5	5	4	5	5	5	5	5	5	5	5	5	5	4.66667	5
307	5	5	5	5	5	5	5	5	5	5	5	5	5	5	5	5	5	5	5	5	3	5	5	5	1	5	5	5	5	5	5	5	5	4.5	5	3.66667	5
308	5	5	5	5	5	5	5	5	5	5	5	5	5	5	5	5	5	5	5	5	3	5	5	5	3	5	5	5	5	5	5	5	5	4.5	5	4.33333	5
309	5	5	5	5	5	5	5	5	5	5	5	5	5	5	5	5	5	5	5	5	5	5	5	5	5	5	5	5	5	5	5	5	5	5	5	5	5
310	5	5	5	5	5	5	5	5	5	5	5	5	5	5	5	5	5	5	5	5	4	5	5	5	2	5	5	5	5	5	5	5	5	4.75	5	4	5
311	5	5	5	5	5	5	5	5	5	5	5	5	5	5	5	5	5	5	5	5	2	5	5	5	4	5	5	5	5	5	5	5	5	4.25	5	4.66667	5
312	5	5	5	5	5	5	5	5	5	5	5	5	5	5	5	5	5	5	5	5	5	5	5	5	4	5	5	5	2	5	5	5	5	5	5	4.66667	4
313	5	5	5	5	5	5	5	5	5	5	5	5	5	5	5	5	5	5	5	5	5	5	5	5	4	5	5	5	4	5	5	5	5	5	5	4.66667	4.66667
314	5	5	5	5	5	5	5	5	5	5	5	5	5	5	5	5	5	5	5	5	5	5	5	5	5	5	5	5	4	5	5	5	5	5	5	5	4.66667
315	5	5	5	5	5	5	5	5	5	5	5	5	5	5	5	5	5	5	5	5	5	5	5	5	4	5	5	5	4	5	5	5	5	5	5	4.66667	4.66667
316	5	5	5	5	5	5	5	5	5	5	5	5	5	5	5	5	5	5	5	5	5	5	5	5	5	5	5	5	2	5	5	5	5	5	5	5	4
317	5	5	5	5	5	5	5	5	5	5	5	5	5	5	5	5	5	5	5	5	5	5	5	5	5	5	5	5	3	5	5	5	5	5	5	5	4.33333
318	5	5	5	5	5	5	5	5	5	5	5	5	5	5	5	5	5	5	5	5	5	5	5	5	5	5	5	5	2	5	5	5	5	5	5	5	4
319	5	5	5	5	5	5	3	5	5	4	5	5	5	5	5	5	5	5	5	5	5	5	5	5	5	5	5	5	5	5	5	4.5	5	5	5	5	5
320	5	5	5	5	5	5	5	5	5	5	5	5	5	4	4	5	5	5	5	5	5	5	5	5	5	5	5	5	5	5	5	5	5	5	4.33333	5	5
321	5	5	5	5	5	5	4	5	5	3	5	5	5	5	4	5	5	5	5	5	5	5	5	5	5	5	5	5	5	5	5	4.5	5	5	4.66667	5	5
322	5	5	5	5	5	5	5	5	5	4	5	5	5	4	4	5	5	5	5	5	5	5	5	5	5	5	5	5	5	5	5	4.83333	5	5	4.33333	5	5
323	5	4	5	5	5	4	4	5	5	4	5	5	5	5	4	5	5	5	5	5	5	5	5	5	5	5	5	5	5	5	4.66667	4.66667	5	5	4.66667	5	5
324	4	4	3	5	5	4	4	5	5	4	5	5	5	5	4	5	5	5	5	5	5	5	5	5	5	5	5	5	5	5	4.16667	4.66667	5	5	4.66667	5	5
325	1	2	5	5	5	3	2	5	5	2	5	5	5	5	5	5	5	5	5	5	5	5	5	5	5	5	5	5	5	5	3.5	4	5	5	5	5	5
326	1	2	5	5	5	1	5	5	5	5	5	5	5	5	5	5	5	5	5	5	5	5	5	5	5	5	5	5	5	5	3.16667	5	5	5	5	5	5
327	5	5	5	5	5	5	5	5	5	5	5	5	5	5	5	5	5	5	5	5	5	5	5	5	5	5	5	5	5	5	5	5	5	5	5	5	5
328	4	5	5	5	5	4	5	5	5	5	5	5	5	5	5	5	5	5	5	5	5	5	5	5	5	5	5	5	5	5	4.66667	5	5	5	5	5	5
329	4	4	5	5	5	5	5	5	5	5	5	5	5	5	5	5	5	5	5	5	5	5	5	5	5	5	5	5	5	5	4.66667	5	5	5	5	5	5
330	5	5	5	5	5	5	5	5	5	5	5	5	5	5	5	5	5	5	5	5	5	5	5	5	5	5	5	5	5	5	5	5	5	5	5	5	5
331	5	5	5	5	5	5	5	5	5	5	5	5	5	5	5	5	5	5	5	5	5	5	5	5	5	5	5	5	5	5	5	5	5	5	5	5	5
332	5	5	5	5	5	2	5	5	5	5	5	5	5	5	5	5	5	5	5	5	5	5	5	5	5	5	5	5	5	5	4.5	5	5	5	5	5	5
333	5	5	5	5	5	1	5	5	5	5	5	5	5	5	5	5	5	5	5	5	5	5	5	5	5	5	5	5	5	5	4.33333	5	5	5	5	5	5
334	5	5	5	5	5	5	5	5	5	5	5	5	5	5	5	5	5	5	5	5	5	5	5	5	5	5	5	5	5	5	5	5	5	5	5	5	5
335	5	5	5	5	5	1	5	5	5	5	5	5	5	5	5	5	5	5	5	5	5	5	5	5	5	5	5	5	5	5	4.33333	5	5	5	5	5	5
336	5	5	5	5	5	1	5	5	5	5	5	5	5	5	5	5	5	5	5	5	5	5	5	5	5	5	5	5	5	5	4.33333	5	5	5	5	5	5
337	5	5	5	5	5	2	5	5	5	5	5	5	5	5	5	5	5	5	5	5	5	5	5	5	5	5	5	5	5	5	4.5	5	5	5	5	5	5
338	5	5	5	5	5	5	5	5	5	5	5	5	5	5	5	5	5	5	5	5	5	5	5	5	4	5	5	5	5	5	5	5	5	5	5	4.66667	5
339	5	5	5	5	5	5	5	5	5	5	5	5	5	5	5	5	5	5	5	5	5	5	5	5	5	5	5	5	1	5	5	5	5	5	5	5	3.66667
340	5	5	5	5	5	5	5	5	5	4	2	4	5	5	5	5	5	5	5	5	5	5	5	5	4	5	5	5	2	5	5	4.16667	5	5	5	4.66667	4
341	5	5	5	5	5	5	5	5	5	4	5	5	5	5	5	5	5	5	5	5	5	5	5	5	5	5	5	5	3	5	5	4.83333	5	5	5	5	4.33333
342	5	5	5	5	5	5	5	5	5	4	4	4	5	4	5	5	5	5	5	5	5	5	5	5	4	5	5	5	4	5	5	4.5	5	5	4.66667	4.66667	4.66667
343	5	5	5	5	5	5	5	5	5	4	4	4	5	4	5	5	5	5	5	5	5	5	5	5	4	5	5	5	4	5	5	4.5	5	5	4.66667	4.66667	4.66667
344	5	5	5	5	5	5	5	5	5	4	4	4	4	4	5	5	5	5	5	5	5	5	5	5	4	5	5	5	4	5	5	4.5	5	5	4.33333	4.66667	4.66667
345	5	5	5	5	5	5	5	5	5	4	4	5	4	4	5	5	5	5	5	5	5	5	5	5	4	5	4	5	4	5	5	4.66667	5	5	4.33333	4.33333	4.66667
346	5	5	5	5	5	5	5	5	5	4	4	5	4	4	5	5	5	5	5	5	5	5	5	5	4	5	4	5	4	5	5	4.66667	5	5	4.33333	4.33333	4.66667
347	5	5	5	5	5	5	5	5	5	4	4	5	4	4	5	5	5	5	5	5	5	5	5	5	4	5	4	5	5	5	5	4.66667	5	5	4.33333	4.33333	5
348	5	5	5	5	5	5	5	5	5	4	4	5	4	4	5	5	5	5	5	5	5	5	5	5	5	5	4	5	5	5	5	4.66667	5	5	4.33333	4.66667	5
349	5	5	5	5	5	5	5	5	5	4	4	5	4	4	5	5	5	5	5	5	5	5	5	5	5	5	5	5	5	5	5	4.66667	5	5	4.33333	5	5
350	5	5	5	5	5	5	5	5	5	4	4	5	4	5	5	5	5	5	5	5	5	5	5	5	5	5	5	5	5	5	5	4.66667	5	5	4.66667	5	5
351	5	5	5	5	5	5	5	5	5	4	3	5	4	5	5	5	5	5	5	5	5	5	5	5	5	5	5	5	5	5	5	4.5	5	5	4.66667	5	5
352	5	5	5	5	5	5	5	5	5	4	4	5	5	5	5	5	4	4	5	5	5	5	5	5	5	5	5	5	5	5	5	4.66667	4.6	5	5	5	5
353	5	5	5	5	5	5	5	5	5	4	4	5	5	5	5	5	4	4	5	5	5	5	5	5	5	5	5	5	5	5	5	4.66667	4.6	5	5	5	5
354	5	5	5	5	5	5	5	5	5	5	5	5	5	5	5	5	4	4	5	5	5	5	5	5	5	5	5	5	5	5	5	5	4.6	5	5	5	5
355	5	5	5	5	5	5	5	5	5	5	5	5	5	5	5	5	4	3	5	5	5	5	5	5	5	5	5	5	5	5	5	5	4.4	5	5	5	5
356	5	5	5	5	5	5	5	5	5	5	5	5	5	5	5	5	4	4	5	5	5	5	5	5	5	5	5	5	5	5	5	5	4.6	5	5	5	5
357	5	5	5	5	5	5	5	5	5	5	5	5	5	5	5	5	4	4	5	5	5	5	5	5	5	5	5	5	5	5	5	5	4.6	5	5	5	5
358	5	5	5	5	5	5	5	5	5	5	5	5	5	5	5	5	5	5	5	5	5	5	5	5	5	5	5	5	5	5	5	5	5	5	5	5	5
359	5	5	5	5	5	5	5	5	5	5	5	5	5	5	5	5	4	4	5	5	5	5	5	5	5	5	5	5	5	5	5	5	4.6	5	5	5	5
360	5	5	5	5	5	5	5	5	5	5	5	5	5	5	5	5	4	5	5	5	5	5	5	5	5	5	5	5	5	5	5	5	4.8	5	5	5	5
361	5	5	5	5	5	5	5	5	5	5	5	5	5	5	5	5	3	5	5	5	5	5	5	5	5	5	5	5	5	5	5	5	4.6	5	5	5	5
362	5	5	5	5	5	5	5	5	5	5	5	5	5	5	5	5	4	5	5	5	5	5	5	5	5	5	5	5	5	4	5	5	4.8	5	5	5	4.66667
363	5	5	5	5	5	5	5	5	5	5	5	5	5	5	5	5	4	5	5	5	5	5	5	5	5	5	5	5	5	4	5	5	4.8	5	5	5	4.66667
364	5	5	5	5	5	5	5	5	5	5	5	5	5	5	5	5	4	5	5	5	5	5	5	5	5	5	5	5	5	4	5	5	4.8	5	5	5	4.66667
365	5	5	5	5	5	5	5	4	5	5	5	5	5	5	5	5	3	5	5	5	5	5	5	5	5	5	5	5	5	4	5	4.83333	4.6	5	5	5	4.66667
366	5	5	5	5	5	5	5	4	5	5	5	5	4	5	5	5	5	5	5	5	5	5	5	5	5	5	5	5	5	4	5	4.83333	5	5	4.66667	5	4.66667
367	4	4	5	5	3	4	5	4	5	5	5	5	4	5	5	5	4	5	5	5	5	5	5	5	5	5	4	5	5	4	4.16667	4.83333	4.8	5	4.66667	4.66667	4.66667
368	5	4	5	5	5	4	5	4	5	5	5	5	5	5	5	5	4	5	5	5	5	5	5	5	5	5	4	5	5	3	4.66667	4.83333	4.8	5	5	4.66667	4.33333
369	5	5	5	5	5	5	5	4	5	5	5	5	4	5	5	5	4	5	5	5	5	5	5	5	5	5	2	5	5	4	5	4.83333	4.8	5	4.66667	4	4.66667
370	5	5	5	5	5	5	5	4	5	5	5	5	4	5	5	5	4	5	5	5	2	5	5	5	5	5	4	5	5	4	5	4.83333	4.8	4.25	4.66667	4.66667	4.66667
371	5	5	5	5	5	5	5	4	5	4	4	5	4	5	5	5	3	5	5	5	1	5	5	5	5	5	5	5	5	5	5	4.5	4.6	4	4.66667	5	5
372	5	5	5	5	5	5	5	4	5	4	4	5	4	5	5	5	4	5	5	5	2	5	5	5	5	5	4	5	5	3	5	4.5	4.8	4.25	4.66667	4.66667	4.33333
373	5	5	5	5	5	5	5	4	5	4	4	5	4	5	5	5	5	5	5	5	1	5	5	5	5	5	4	5	5	4	5	4.5	5	4	4.66667	4.66667	4.66667
374	4	3	5	5	4	3	5	5	5	5	5	5	4	5	5	5	5	5	5	5	2	5	5	5	5	5	4	5	5	2	4	5	5	4.25	4.66667	4.66667	4
375	5	4	5	5	5	4	5	5	5	5	5	5	4	5	5	5	5	5	5	5	5	5	5	5	5	5	3	5	5	4	4.66667	5	5	5	4.66667	4.33333	4.66667
376	4	4	5	5	4	4	5	5	5	5	5	5	4	5	5	5	5	5	5	5	5	5	5	5	5	5	4	5	5	3	4.33333	5	5	5	4.66667	4.66667	4.33333
377	4	3	5	5	4	4	5	5	5	5	5	5	4	5	5	5	4	5	5	5	5	5	5	5	5	5	4	5	5	2	4.16667	5	4.8	5	4.66667	4.66667	4
378	5	5	5	5	5	5	5	5	5	5	5	5	5	5	5	5	5	5	5	5	5	5	5	5	5	5	4	5	5	5	5	5	5	5	5	4.66667	5
379	5	5	5	5	5	5	5	5	5	5	5	5	5	5	5	5	4	5	5	5	5	5	5	5	5	5	5	5	5	5	5	5	4.8	5	5	5	5
380	5	5	5	5	5	5	5	5	5	5	5	5	5	5	5	5	4	5	5	5	5	5	5	5	5	5	3	5	5	5	5	5	4.8	5	5	4.33333	5
381	5	5	5	5	5	5	5	5	5	5	5	5	5	5	5	5	5	5	5	5	5	5	5	5	5	5	3	5	5	5	5	5	5	5	5	4.33333	5
382	5	5	5	5	5	5	5	5	5	5	5	5	5	5	5	5	4	5	5	5	5	5	4	5	5	5	4	5	5	5	5	5	4.8	4.75	5	4.66667	5
383	5	5	5	5	5	5	5	5	5	5	5	5	5	5	5	5	5	5	5	5	5	4	5	5	5	5	5	5	5	5	5	5	5	4.75	5	5	5
384	5	5	5	5	5	5	5	5	5	5	5	5	5	5	5	5	4	5	5	5	5	5	5	5	5	5	4	5	5	5	5	5	4.8	5	5	4.66667	5
385	5	5	5	5	5	5	5	5	5	5	5	5	5	5	5	5	4	5	5	5	5	5	5	5	5	5	3	5	5	5	5	5	4.8	5	5	4.33333	5
386	5	5	5	5	5	5	5	5	5	5	5	5	5	5	5	5	4	5	5	5	5	5	5	5	5	5	5	5	5	5	5	5	4.8	5	5	5	5
387	5	5	5	5	5	5	5	5	5	5	5	5	5	5	5	5	5	5	5	3	5	5	5	5	5	5	4	5	5	5	5	5	4.6	5	5	4.66667	5
388	5	5	5	5	5	5	5	5	5	5	5	5	5	5	5	5	4	5	5	4	5	5	5	5	5	5	3	5	5	5	5	5	4.6	5	5	4.33333	5
389	5	5	5	5	5	5	5	5	5	5	5	5	5	5	5	5	4	5	5	4	5	5	5	5	5	5	4	5	5	5	5	5	4.6	5	5	4.66667	5
390	5	5	5	5	5	5	5	5	5	5	5	4	5	5	5	5	5	5	5	4	5	5	5	5	5	5	4	5	5	5	5	4.83333	4.8	5	5	4.66667	5
391	5	5	5	5	5	5	5	5	5	5	5	5	5	5	5	5	5	5	5	5	5	5	5	5	5	5	5	5	5	5	5	5	5	5	5	5	5
392	5	5	5	5	5	5	5	5	5	5	5	3	5	5	4	5	5	5	5	3	5	5	5	5	5	5	3	5	5	5	5	4.66667	4.6	5	4.66667	4.33333	5
393	5	5	5	5	5	4	5	5	5	5	5	3	5	5	3	5	5	5	5	3	2	5	5	5	5	5	4	5	5	5	4.83333	4.66667	4.6	4.25	4.33333	4.66667	5
394	5	5	5	5	5	4	5	5	5	5	5	5	5	5	4	5	5	5	5	4	3	5	5	5	5	5	5	5	5	5	4.83333	5	4.8	4.5	4.66667	5	5
395	5	5	5	5	5	4	5	5	5	5	5	4	5	5	4	5	5	5	5	4	1	5	5	5	5	5	4	5	5	5	4.83333	4.83333	4.8	4	4.66667	4.66667	5
396	5	5	5	5	5	4	5	5	5	5	5	4	5	5	5	5	5	5	5	4	3	5	5	5	5	5	4	5	5	5	4.83333	4.83333	4.8	4.5	5	4.66667	5
397	5	5	3	5	5	4	5	5	5	5	5	4	5	5	4	5	5	5	5	5	1	5	5	5	5	5	4	5	5	5	4.5	4.83333	5	4	4.66667	4.66667	5
398	5	5	5	5	5	4	5	5	5	5	5	5	5	5	5	5	5	5	5	4	4	5	5	5	5	5	5	5	5	5	4.83333	5	4.8	4.75	5	5	5
399	5	5	5	5	5	4	5	5	5	5	5	4	5	5	5	5	5	5	5	4	1	5	5	5	5	5	3	5	5	5	4.83333	4.83333	4.8	4	5	4.33333	5
400	5	5	5	5	5	4	5	5	5	5	5	4	5	5	5	5	5	5	5	5	1	5	5	5	5	5	4	5	5	5	4.83333	4.83333	5	4	5	4.66667	5
401	5	5	5	5	3	4	5	5	5	5	5	5	5	5	5	5	5	5	5	4	1	5	5	5	5	5	4	5	5	5	4.5	5	4.8	4	5	4.66667	5
402	5	5	5	5	5	4	5	5	5	5	5	4	5	5	5	5	5	5	5	4	2	5	5	5	5	5	4	5	5	5	4.83333	4.83333	4.8	4.25	5	4.66667	5
403	5	5	5	5	5	4	5	5	5	5	5	5	5	5	5	5	5	5	5	4	2	5	5	5	5	5	5	5	5	4	4.83333	5	4.8	4.25	5	5	4.66667
404	5	5	5	5	5	5	5	5	5	5	5	5	5	5	5	5	5	5	5	5	2	5	5	5	5	5	5	5	5	4	5	5	5	4.25	5	5	4.66667
405	5	5	5	5	5	5	5	5	5	5	5	5	5	5	5	5	5	5	5	5	3	5	5	5	5	5	5	5	5	3	5	5	5	4.5	5	5	4.33333
406	5	5	5	5	5	5	5	5	5	5	5	5	5	5	5	5	5	5	5	5	2	5	5	5	5	5	5	5	5	3	5	5	5	4.25	5	5	4.33333
407	5	5	5	5	5	5	5	5	5	5	5	5	5	5	5	5	4	5	5	5	1	5	5	5	5	5	5	5	5	4	5	5	4.8	4	5	5	4.66667
408	5	5	5	5	5	5	5	5	5	5	5	5	5	5	5	5	5	5	5	5	5	5	5	5	5	5	5	5	5	4	5	5	5	5	5	5	4.66667
409	5	5	5	5	5	5	5	5	5	5	5	5	5	5	5	5	4	5	5	5	5	5	5	5	5	5	5	5	5	3	5	5	4.8	5	5	5	4.33333
410	5	5	5	5	5	5	5	5	5	5	5	5	5	5	5	5	4	5	5	5	5	5	1	1	5	5	5	5	5	3	5	5	4.8	3	5	5	4.33333
411	5	5	5	5	5	5	5	5	5	5	5	5	5	4	5	5	2	5	5	5	5	5	2	4	5	5	5	5	5	4	5	5	4.4	4	4.66667	5	4.66667
412	5	5	3	5	5	5	5	5	5	5	5	5	5	5	3	5	3	5	5	5	5	5	4	3	5	5	5	3	5	4	4.66667	5	4.6	4.25	4.33333	5	4
413	5	5	5	5	5	5	4	4	4	4	4	5	5	5	4	5	4	5	5	5	5	5	4	4	5	5	5	2	5	4	5	4.16667	4.8	4.5	4.66667	5	3.66667
414	5	5	5	5	5	5	5	5	5	5	4	5	5	5	5	5	4	5	5	5	5	5	4	4	5	5	5	5	5	5	5	4.83333	4.8	4.5	5	5	5
415	5	5	5	5	5	5	4	4	4	4	4	5	5	5	4	5	4	5	5	4	5	5	2	2	5	5	5	4	5	2	5	4.16667	4.6	3.5	4.66667	5	3.66667
416	5	5	5	5	5	5	2	4	4	3	4	5	5	5	3	5	4	5	5	4	5	5	3	3	5	5	5	4	5	4	5	3.66667	4.6	4	4.33333	5	4.33333
417	5	5	5	5	5	5	5	4	4	4	4	5	5	5	5	5	5	5	5	5	5	5	5	4	5	5	5	3	5	4	5	4.33333	5	4.75	5	5	4
418	5	5	5	5	5	5	5	5	5	4	4	5	5	5	4	5	2	5	5	4	5	5	4	1	5	5	5	4	5	4	5	4.66667	4.2	3.75	4.66667	5	4.33333
419	5	5	5	5	5	5	5	5	5	5	4	5	5	5	5	5	4	5	5	4	5	5	1	1	5	5	5	3	5	4	5	4.83333	4.6	3	5	5	4
420	5	5	5	5	5	5	5	5	5	3	3	5	5	5	5	5	5	5	5	5	5	5	2	3	5	5	5	3	5	3	5	4.33333	5	3.75	5	5	3.66667
421	5	5	5	5	5	5	5	5	5	5	4	5	5	5	4	5	4	5	5	4	5	5	4	4	5	5	5	1	5	4	5	4.83333	4.6	4.5	4.66667	5	3.33333
422	5	5	5	5	5	4	5	5	5	4	5	5	5	5	5	5	5	5	5	5	5	5	5	4	5	5	5	4	5	4	4.83333	4.83333	5	4.75	5	5	4.33333
423	5	4	4	5	4	3	5	5	5	3	5	5	5	5	3	5	3	5	5	3	5	5	2	2	5	5	5	4	5	3	4.16667	4.66667	4.2	3.5	4.33333	5	4
424	5	5	4	5	5	4	5	5	5	4	5	5	5	5	5	5	3	5	5	4	4	5	3	1	5	5	5	5	5	5	4.66667	4.83333	4.4	3.25	5	5	5
425	5	2	4	5	5	5	5	5	5	5	5	5	5	5	5	5	5	5	5	5	5	4	1	1	5	5	5	3	5	4	4.33333	5	5	2.75	5	5	4
426	5	2	2	5	4	4	5	5	5	4	4	5	5	5	5	5	5	5	5	4	5	5	2	1	5	5	5	3	5	2	3.66667	4.66667	4.8	3.25	5	5	3.33333
427	5	5	5	5	5	5	5	5	5	4	4	5	5	5	5	5	2	5	5	2	5	5	1	1	5	5	5	4	5	2	5	4.66667	3.8	3	5	5	3.66667
428	5	5	5	5	5	5	5	5	5	5	4	4	5	5	5	5	2	5	5	3	5	5	2	2	5	5	5	2	5	2	5	4.66667	4	3.5	5	5	3
429	5	5	5	5	5	5	5	5	5	2	1	4	5	5	5	5	4	5	5	4	5	5	4	4	5	5	5	5	5	4	5	3.66667	4.6	4.5	5	5	4.66667
430	5	5	5	5	5	5	5	5	5	4	5	4	5	5	5	5	5	5	5	4	5	5	2	2	5	5	5	2	5	2	5	4.66667	4.8	3.5	5	5	3
431	5	5	5	5	5	5	5	5	5	4	3	5	5	5	5	5	5	5	5	3	5	5	4	3	5	5	5	4	5	4	5	4.5	4.6	4.25	5	5	4.33333
432	5	5	5	5	5	5	4	5	5	2	4	4	5	5	5	5	2	5	5	1	5	5	1	1	5	5	5	4	5	4	5	4	3.6	3	5	5	4.33333
433	5	5	5	5	5	5	1	5	5	1	1	1	5	5	5	5	5	5	5	5	5	5	5	4	5	5	5	3	5	2	5	2.33333	5	4.75	5	5	3.33333
434	5	5	5	5	5	5	3	5	5	4	5	4	5	5	5	5	4	5	5	4	5	5	2	1	5	5	5	3	5	4	5	4.33333	4.6	3.25	5	5	4
435	5	5	5	5	5	5	5	5	5	5	5	5	5	5	5	5	1	5	5	5	5	5	1	1	5	5	5	1	5	3	5	5	4.2	3	5	5	3
436	5	5	5	5	5	5	5	5	5	5	5	5	5	5	5	5	4	5	5	3	5	5	3	3	5	5	5	1	5	3	5	5	4.4	4	5	5	3
437	5	5	5	5	5	5	5	5	5	5	5	5	5	5	5	5	4	3	5	3	5	5	1	2	5	5	5	4	5	4	5	5	4	3.25	5	5	4.33333
438	5	5	5	5	5	5	5	5	5	5	5	5	4	5	5	2	2	2	5	2	5	5	2	2	5	5	5	4	5	4	5	5	2.6	3.5	4.66667	5	4.33333
439	5	5	5	5	5	5	5	5	5	5	5	5	5	5	5	5	5	4	5	5	5	5	1	4	5	5	5	5	5	3	5	5	4.8	3.75	5	5	4.33333
440	5	5	5	5	5	5	5	5	5	5	5	5	2	2	1	4	4	4	5	4	5	5	4	2	5	5	5	4	5	4	5	5	4.2	4	1.66667	5	4.33333
441	5	5	5	5	5	5	5	5	5	5	5	5	4	2	2	2	2	2	5	2	5	5	2	2	5	5	5	1	5	2	5	5	2.6	3.5	2.66667	5	2.66667
442	5	5	5	5	5	5	5	5	5	5	5	5	5	5	5	2	2	2	5	3	5	5	5	5	5	5	5	5	5	5	5	5	2.8	5	5	5	5
443	5	5	5	5	5	5	5	5	5	5	5	5	4	5	3	4	5	4	5	5	5	5	3	5	5	5	5	4	5	5	5	5	4.6	4.5	4	5	4.66667
444	5	4	3	5	3	3	5	5	5	5	5	5	3	2	3	2	3	3	5	2	5	5	3	4	5	5	5	3	5	5	3.83333	5	3	4.25	2.66667	5	4.33333
445	5	5	3	5	5	4	5	5	5	5	5	5	5	5	5	4	5	4	5	4	5	5	5	5	5	5	5	2	5	5	4.5	5	4.4	5	5	5	4
446	5	4	3	5	5	5	5	5	5	5	5	5	2	2	3	3	4	4	5	3	5	5	4	1	5	5	5	1	5	5	4.5	5	3.8	3.75	2.33333	5	3.66667
447	5	4	4	5	4	4	5	5	5	5	5	5	3	2	2	4	4	4	5	4	5	5	4	4	5	5	5	2	5	5	4.33333	5	4.2	4.5	2.33333	5	4
448	5	3	2	5	5	4	5	5	5	5	5	5	4	5	3	4	5	3	5	3	5	5	2	3	5	5	5	3	5	5	4	5	4	3.75	4	5	4.33333
449	5	5	5	5	5	5	5	5	5	5	5	5	4	4	4	4	4	4	5	4	5	5	5	5	5	5	5	4	5	5	5	5	4.2	5	4	5	4.66667
450	5	5	5	5	5	5	5	5	5	5	5	5	4	4	4	4	4	4	5	5	5	5	5	5	5	5	5	3	5	5	5	5	4.4	5	4	5	4.33333
451	5	5	5	5	5	5	5	5	5	5	5	5	4	4	4	3	4	4	5	5	4	4	5	5	5	5	5	4	5	5	5	5	4.2	4.5	4	5	4.66667
452	5	5	5	5	5	5	5	5	5	5	5	5	4	4	4	4	4	4	5	5	5	5	5	5	5	5	5	3	5	5	5	5	4.4	5	4	5	4.33333
453	5	5	5	5	5	5	5	5	5	5	5	5	4	4	4	4	4	3	5	5	5	4	4	5	5	5	5	4	5	5	5	5	4.2	4.5	4	5	4.66667
454	5	5	5	5	5	5	5	5	5	5	5	5	5	5	5	5	5	5	5	4	5	5	5	5	5	5	5	5	5	5	5	5	4.8	5	5	5	5
455	5	5	5	5	5	5	5	5	5	5	5	5	4	4	4	4	4	4	5	5	5	5	5	5	5	5	5	5	5	5	5	5	4.4	5	4	5	5
456	5	5	5	5	5	5	5	5	5	5	5	5	4	4	4	4	4	4	5	5	5	5	5	5	5	5	5	5	5	5	5	5	4.4	5	4	5	5
457	5	5	5	3	5	3	5	5	5	5	5	5	5	4	5	3	5	5	5	5	5	5	5	5	5	5	5	5	5	5	4.33333	5	4.6	5	4.66667	5	5
458	2	5	5	5	5	5	5	5	2	5	5	5	4	4	5	4	5	5	5	5	5	4	4	5	5	3	4	5	5	5	4.5	4.5	4.8	4.5	4.33333	4	5
459	5	5	4	5	3	5	5	3	5	5	5	5	3	5	5	4	5	5	5	5	4	5	5	5	5	5	4	5	5	5	4.5	4.66667	4.8	4.75	4.33333	4.66667	5
460	5	3	5	5	3	5	4	5	5	5	5	5	5	5	4	4	5	5	5	5	5	5	5	5	5	4	5	5	5	5	4.33333	4.83333	4.8	5	4.66667	4.66667	5
461	3	5	5	5	5	5	5	5	5	5	5	5	5	5	5	5	5	3	5	5	5	4	5	5	5	5	5	5	5	5	4.66667	5	4.6	4.75	5	5	5
462	5	2	2	5	3	2	5	5	5	5	5	4	5	5	4	3	5	5	5	5	5	5	5	5	5	5	5	5	5	5	3.16667	4.83333	4.6	5	4.66667	5	5
463	5	5	5	5	3	5	5	5	5	5	5	4	5	5	5	5	5	5	5	5	5	5	5	5	5	5	5	5	5	5	4.66667	4.83333	5	5	5	5	5
464	5	5	5	5	5	5	5	5	5	5	5	4	3	5	5	5	5	5	5	5	5	5	5	5	5	5	5	5	4	5	5	4.83333	5	5	4.33333	5	4.66667
465	5	5	5	5	3	5	5	5	5	5	5	4	5	5	5	5	5	5	5	5	4	5	5	5	5	5	5	5	4	5	4.66667	4.83333	5	4.75	5	5	4.66667
466	5	5	5	4	3	5	5	5	5	5	5	4	5	4	5	5	4	5	5	5	5	5	5	5	5	5	5	5	4	5	4.5	4.83333	4.8	5	4.66667	5	4.66667
467	5	5	5	5	4	5	4	5	5	5	5	5	5	5	5	5	5	5	5	5	5	5	5	5	5	5	5	5	5	5	4.83333	4.83333	5	5	5	5	5
468	2	5	5	5	5	5	5	5	5	4	4	4	5	5	4	5	5	5	5	5	5	5	5	5	5	5	5	5	4	4	4.5	4.5	5	5	4.66667	5	4.33333
469	5	5	5	5	5	5	5	5	5	5	5	4	5	4	5	5	5	5	5	5	5	5	5	5	5	5	5	5	5	4	5	4.83333	5	5	4.66667	5	4.66667
470	5	4	4	5	4	5	5	5	5	5	5	4	5	5	5	5	5	5	5	5	5	5	5	5	5	5	5	5	4	5	4.5	4.83333	5	5	5	5	4.66667
471	4	3	3	5	3	4	5	5	4	4	4	4	4	5	3	5	5	5	5	5	5	5	5	5	5	5	5	5	2	4	3.66667	4.33333	5	5	4	5	3.66667
472	5	3	4	5	4	4	4	3	4	4	4	4	4	5	5	5	2	2	5	5	1	5	5	5	5	5	4	5	3	5	4.16667	3.83333	3.8	4	4.66667	4.66667	4.33333
473	5	5	5	5	5	5	4	5	5	4	5	4	4	5	5	5	4	4	4	4	4	4	5	5	5	5	5	5	4	4	5	4.5	4.2	4.5	4.66667	5	4.33333
474	5	5	5	5	5	5	4	5	5	4	5	4	4	5	5	4	4	4	4	4	4	4	5	5	5	5	5	5	4	4	5	4.5	4	4.5	4.66667	5	4.33333
475	5	5	5	5	5	5	4	5	5	4	5	4	4	5	5	4	4	4	4	4	5	4	5	5	5	5	5	5	4	4	5	4.5	4	4.75	4.66667	5	4.33333
476	5	5	5	5	5	5	4	5	5	4	5	4	4	5	5	5	4	5	4	4	5	4	5	5	5	5	5	5	5	5	5	4.5	4.4	4.75	4.66667	5	5
477	5	5	5	5	5	5	4	5	5	4	5	4	5	5	5	5	5	5	4	4	5	5	5	5	5	5	5	5	5	5	5	4.5	4.6	5	5	5	5
478	5	5	5	5	5	5	4	5	5	4	5	4	5	5	5	5	5	5	4	4	5	5	5	5	5	5	5	5	5	5	5	4.5	4.6	5	5	5	5
479	5	5	5	5	5	5	4	5	5	4	5	4	5	5	5	5	5	5	4	4	5	5	5	5	5	5	5	5	5	5	5	4.5	4.6	5	5	5	5
480	5	5	5	5	5	5	4	5	5	4	5	4	5	5	5	5	5	5	5	5	5	5	5	5	5	5	5	5	3	5	5	4.5	5	5	5	5	4.33333
481	5	5	5	5	5	5	4	5	5	4	5	4	5	5	5	5	5	5	5	5	5	5	5	5	5	5	5	5	5	5	5	4.5	5	5	5	5	5
482	5	5	5	3	5	5	4	5	5	4	5	4	5	5	5	5	5	5	5	5	5	5	5	5	5	5	5	5	5	5	4.66667	4.5	5	5	5	5	5
483	5	5	5	5	5	5	4	5	5	4	5	5	5	5	5	5	5	5	5	5	5	5	5	5	5	5	5	5	5	5	5	4.66667	5	5	5	5	5
484	4	3	3	5	4	4	5	5	5	5	5	4	5	5	5	5	5	5	5	5	5	5	5	5	5	5	5	5	5	5	3.83333	4.83333	5	5	5	5	5
485	5	5	5	5	5	5	5	5	5	5	5	4	5	5	5	5	5	5	5	5	5	5	5	5	5	5	5	5	5	5	5	4.83333	5	5	5	5	5
486	5	5	5	5	5	5	5	5	5	5	5	5	5	5	5	5	5	5	5	5	5	5	5	5	5	5	5	5	5	5	5	5	5	5	5	5	5
487	5	5	5	5	5	5	5	5	5	5	5	4	5	5	5	5	5	5	5	5	5	5	5	5	5	5	5	5	5	5	5	4.83333	5	5	5	5	5
488	5	5	5	5	5	5	5	5	5	5	5	4	5	5	5	5	5	5	5	5	5	5	5	5	5	5	5	5	5	5	5	4.83333	5	5	5	5	5
489	5	5	5	5	5	5	5	5	5	5	5	4	5	5	5	5	5	5	5	5	5	5	5	5	5	5	5	5	5	5	5	4.83333	5	5	5	5	5
490	3	3	4	2	5	4	5	5	5	5	5	4	5	5	5	4	5	5	5	5	5	5	5	5	5	5	5	5	5	5	3.5	4.83333	4.8	5	5	5	5
491	5	5	5	5	5	5	5	5	5	5	5	4	5	5	5	4	5	5	5	5	5	5	5	5	5	5	4	5	5	5	5	4.83333	4.8	5	5	4.66667	5
492	5	5	5	5	5	5	5	5	5	5	5	5	5	5	5	4	5	5	5	5	5	5	5	5	5	5	4	5	5	5	5	5	4.8	5	5	4.66667	5
493	4	3	4	5	5	4	5	5	5	5	5	4	4	5	5	4	5	5	5	5	5	5	5	5	5	5	4	5	5	5	4.16667	4.83333	4.8	5	4.66667	4.66667	5
494	5	5	5	5	5	4	5	5	5	5	5	4	4	5	5	4	5	5	5	5	5	5	5	5	5	5	5	5	5	5	4.83333	4.83333	4.8	5	4.66667	5	5
495	4	4	4	5	5	4	5	5	5	5	5	5	4	5	5	4	5	5	5	5	5	5	5	5	5	5	4	5	5	5	4.33333	5	4.8	5	4.66667	4.66667	5
496	5	5	5	5	5	5	5	5	5	5	5	5	5	5	5	4	5	5	5	5	5	5	5	5	5	5	4	5	5	5	5	5	4.8	5	5	4.66667	5
497	4	3	3	5	5	5	5	5	5	5	5	5	5	5	5	5	5	5	5	5	5	5	5	5	5	5	5	5	5	5	4.16667	5	5	5	5	5	5
498	5	5	5	5	5	5	5	5	5	5	5	5	5	5	5	5	5	5	5	5	5	5	5	5	5	5	5	5	5	5	5	5	5	5	5	5	5
499	5	5	4	5	5	4	5	5	5	5	5	5	5	5	5	5	5	5	5	5	5	5	5	5	5	5	5	5	5	5	4.66667	5	5	5	5	5	5
500	5	5	5	5	5	4	5	5	5	5	5	5	5	5	5	5	5	5	5	5	5	5	5	5	5	5	5	5	5	5	4.83333	5	5	5	5	5	5
501	5	5	5	5	5	4	5	5	5	5	5	5	5	5	5	5	5	5	5	5	5	5	5	5	5	5	5	5	5	5	4.83333	5	5	5	5	5	5
502	5	5	5	5	5	4	5	5	5	5	5	5	5	5	5	5	5	5	5	5	5	5	5	5	5	5	5	5	5	5	4.83333	5	5	5	5	5	5
503	4	3	3	5	5	4	5	5	5	5	5	5	5	5	5	5	5	5	5	5	5	5	5	5	5	5	5	5	4	5	4	5	5	5	5	5	4.66667
504	5	4	4	5	5	4	5	5	5	5	5	5	5	5	5	5	5	5	5	5	5	5	5	5	5	5	5	5	4	5	4.5	5	5	5	5	5	4.66667
505	2	3	3	5	5	3	5	5	5	5	5	5	5	5	5	5	4	5	5	5	5	5	5	5	5	5	5	5	3	5	3.5	5	4.8	5	5	5	4.33333
506	5	5	5	5	5	5	5	5	5	5	5	5	5	5	5	5	4	5	5	5	5	5	5	5	5	5	5	5	4	5	5	5	4.8	5	5	5	4.66667
507	4	5	5	5	5	4	5	5	5	5	5	5	5	5	5	5	5	5	5	5	5	5	5	5	5	5	5	5	5	5	4.66667	5	5	5	5	5	5
508	4	3	4+H37:H112	5	5	5	5	5	5	5	5	5	5	5	5	5	5	5	5	5	5	5	5	5	5	5	5	5	3	5	4.4	5	5	5	5	5	4.33333
509	3	3	4	5	5	4	5	5	5	5	5	5	5	5	5	5	5	5	5	5	5	5	5	5	5	5	5	5	3	5	4	5	5	5	5	5	4.33333
510	4	3	4	5	5	4	5	5	5	5	5	5	5	5	5	5	4	5	5	5	5	5	5	5	5	5	5	5	1	5	4.16667	5	4.8	5	5	5	3.66667
511	4	4	4	5	5	5	5	5	5	5	5	5	5	4	5	5	4	5	5	5	5	5	5	5	5	5	5	5	4	5	4.5	5	4.8	5	4.66667	5	4.66667
512	5	5	5	5	5	4	5	5	5	5	5	5	5	5	5	5	5	5	5	5	5	5	5	5	5	5	5	5	5	5	4.83333	5	5	5	5	5	5
513	5	4	4	5	5	5	5	5	5	5	5	5	5	4	4	5	4	5	5	5	5	5	5	5	5	5	5	5	3	5	4.66667	5	4.8	5	4.33333	5	4.33333
514	4	3	3	5	5	4	5	5	5	5	5	5	5	4	5	5	4	5	5	5	5	5	5	5	5	5	5	5	4	5	4	5	4.8	5	4.66667	5	4.66667
515	5	5	5	5	5	5	5	5	5	5	5	5	5	4	4	5	4	5	5	5	5	5	5	5	5	5	5	5	4	5	5	5	4.8	5	4.33333	5	4.66667
516	5	5	5	5	5	5	5	5	5	5	5	4	5	5	4	5	3	5	5	5	5	5	5	5	5	5	5	5	4	5	5	4.83333	4.6	5	4.66667	5	4.66667
517	5	5	5	5	5	5	5	5	5	5	5	5	5	5	5	5	5	5	5	5	5	5	5	5	5	5	5	5	3	5	5	5	5	5	5	5	4.33333
518	5	5	5	5	5	5	5	5	5	5	5	4	5	5	4	5	5	5	5	5	5	5	5	5	5	5	5	5	4	5	5	4.83333	5	5	4.66667	5	4.66667
519	5	5	5	5	5	5	5	5	5	5	5	5	5	5	5	5	5	5	5	5	5	5	5	5	5	5	5	5	4	5	5	5	5	5	5	5	4.66667
520	5	5	5	5	5	5	5	5	5	5	5	4	5	5	5	5	2	5	5	5	5	5	5	5	5	5	5	5	2	5	5	4.83333	4.4	5	5	5	4
521	5	5	5	5	5	5	5	5	5	5	5	4	5	5	5	5	5	5	5	5	5	5	5	5	5	5	5	5	5	5	5	4.83333	5	5	5	5	5
522	5	5	5	5	5	5	5	5	5	5	5	4	5	5	5	5	5	5	5	5	5	5	5	5	5	5	5	5	5	5	5	4.83333	5	5	5	5	5
523	5	5	5	5	5	5	5	5	5	5	5	5	5	5	5	5	3	5	5	5	5	5	5	5	5	5	5	5	5	5	5	5	4.6	5	5	5	5
524	5	5	5	5	5	5	5	5	5	5	5	5	5	5	5	5	4	5	5	5	5	5	5	5	5	5	5	5	5	5	5	5	4.8	5	5	5	5
525	5	5	5	5	5	5	5	5	5	5	5	4	5	5	5	5	5	4	5	5	5	5	5	5	5	5	5	5	5	5	5	4.83333	4.8	5	5	5	5
526	5	5	5	5	5	5	5	5	5	5	5	4	5	5	5	5	4	4	5	5	5	5	5	5	5	5	5	5	5	5	5	4.83333	4.6	5	5	5	5
527	5	5	5	5	5	5	5	5	5	5	5	5	5	5	5	5	5	4	5	5	5	5	5	5	5	5	5	5	5	5	5	5	4.8	5	5	5	5
528	5	5	5	5	5	5	3	4	5	5	5	2	5	5	5	5	4	3	5	5	5	5	5	5	5	5	5	5	5	5	5	4	4.4	5	5	5	5
529	5	5	5	5	5	5	5	4	5	5	5	4	5	5	5	5	4	4	5	5	5	5	5	5	5	5	5	5	5	5	5	4.66667	4.6	5	5	5	5
530	5	5	5	5	5	5	5	5	5	5	5	5	5	5	5	5	5	5	5	5	5	5	5	5	5	5	5	5	5	5	5	5	5	5	5	5	5
531	4	4	3	5	5	4	4	4	5	5	5	4	5	5	5	5	4	2	5	5	5	5	5	5	5	5	5	5	5	5	4.16667	4.5	4.2	5	5	5	5
532	5	5	5	5	5	5	5	4	5	5	5	5	5	5	5	5	4	4	5	5	5	5	5	5	5	5	5	5	5	5	5	4.83333	4.6	5	5	5	5
533	4	4	4	5	5	5	4	5	5	5	5	5	5	5	5	5	5	2	5	5	5	5	5	5	5	5	5	5	5	5	4.5	4.83333	4.4	5	5	5	5
534	5	5	5	5	5	5	5	5	5	5	5	5	5	5	5	5	4	4	5	5	5	5	5	5	5	5	5	5	5	5	5	5	4.6	5	5	5	5
535	5	5	5	5	5	5	5	5	5	5	5	5	5	5	5	5	5	4	5	5	5	5	5	5	5	5	5	5	5	5	5	5	4.8	5	5	5	5
536	5	5	4	5	5	5	5	5	5	5	5	5	5	5	5	5	5	5	5	5	5	5	5	5	5	5	5	5	5	5	4.83333	5	5	5	5	5	5
537	5	5	5	5	5	5	5	4	4	4	5	5	5	5	5	5	4	4	5	5	5	5	5	5	5	5	5	5	5	5	5	4.5	4.6	5	5	5	5
538	5	5	5	5	5	5	2	2	4	4	5	5	5	5	4	5	4	4	5	5	5	5	5	5	5	5	5	5	5	5	5	3.66667	4.6	5	4.66667	5	5
539	5	5	5	5	5	5	5	5	5	5	5	5	5	5	1	5	4	4	5	5	5	5	5	5	2	5	5	5	5	5	5	5	4.6	5	3.66667	4	5
540	5	5	5	5	5	5	5	5	5	5	5	5	5	5	5	5	2	2	5	5	5	5	5	5	4	5	5	5	5	5	5	5	3.8	5	5	4.66667	5
541	5	5	5	5	5	5	5	5	5	5	5	5	5	5	5	5	4	5	5	5	5	5	5	5	3	5	5	5	5	5	5	5	4.8	5	5	4.33333	5
542	5	5	5	5	5	5	5	5	5	5	5	5	5	5	5	5	5	5	5	5	5	5	5	5	4	5	5	5	5	5	5	5	5	5	5	4.66667	5
543	5	5	5	5	5	5	5	5	5	5	5	5	5	5	5	5	5	5	5	5	3	5	5	5	1	5	5	5	5	5	5	5	5	4.5	5	3.66667	5
544	5	5	5	5	5	5	5	5	5	5	5	5	5	5	5	5	5	5	5	5	3	5	5	5	3	5	5	5	5	5	5	5	5	4.5	5	4.33333	5
545	5	5	5	5	5	5	5	5	5	5	5	5	5	5	5	5	5	5	5	5	5	5	5	5	5	5	5	5	5	5	5	5	5	5	5	5	5
546	5	5	5	5	5	5	5	5	5	5	5	5	5	5	5	5	5	5	5	5	4	5	5	5	2	5	5	5	5	5	5	5	5	4.75	5	4	5
547	5	5	5	5	5	5	5	5	5	5	5	5	5	5	5	5	5	5	5	5	2	5	5	5	4	5	5	5	5	5	5	5	5	4.25	5	4.66667	5
548	5	5	5	5	5	5	5	5	5	5	5	5	5	5	5	5	5	5	5	5	5	5	5	5	4	5	5	5	2	5	5	5	5	5	5	4.66667	4
549	5	5	5	5	5	5	5	5	5	5	5	5	5	5	5	5	5	5	5	5	5	5	5	5	4	5	5	5	4	5	5	5	5	5	5	4.66667	4.66667
550	5	5	5	5	5	5	5	5	5	5	5	5	5	5	5	5	5	5	5	5	5	5	5	5	5	5	5	5	4	5	5	5	5	5	5	5	4.66667
551	5	5	5	5	5	5	5	5	5	5	5	5	5	5	5	5	5	5	5	5	5	5	5	5	4	5	5	5	4	5	5	5	5	5	5	4.66667	4.66667
552	5	5	5	5	5	5	5	5	5	5	5	5	5	5	5	5	5	5	5	5	5	5	5	5	5	5	5	5	2	5	5	5	5	5	5	5	4
553	5	5	5	5	5	5	5	5	5	5	5	5	5	5	5	5	5	5	5	5	5	5	5	5	5	5	5	5	3	5	5	5	5	5	5	5	4.33333
554	5	5	5	5	5	5	5	5	5	5	5	5	5	5	5	5	5	5	5	5	5	5	5	5	5	5	5	5	2	5	5	5	5	5	5	5	4
555	5	5	5	5	5	5	3	5	5	4	5	5	5	5	5	5	5	5	5	5	5	5	5	5	5	5	5	5	5	5	5	4.5	5	5	5	5	5
556	5	5	5	5	5	5	5	5	5	5	5	5	5	4	4	5	5	5	5	5	5	5	5	5	5	5	5	5	5	5	5	5	5	5	4.33333	5	5
557	5	5	5	5	5	5	4	5	5	3	5	5	5	5	4	5	5	5	5	5	5	5	5	5	5	5	5	5	5	5	5	4.5	5	5	4.66667	5	5
558	5	5	5	5	5	5	5	5	5	4	5	5	5	4	4	5	5	5	5	5	5	5	5	5	5	5	5	5	5	5	5	4.83333	5	5	4.33333	5	5
559	5	4	5	5	5	4	4	5	5	4	5	5	5	5	4	5	5	5	5	5	5	5	5	5	5	5	5	5	5	5	4.66667	4.66667	5	5	4.66667	5	5
560	4	4	3	5	5	4	4	5	5	4	5	5	5	5	4	5	5	5	5	5	5	5	5	5	5	5	5	5	5	5	4.16667	4.66667	5	5	4.66667	5	5
561	1	2	5	5	5	3	2	5	5	2	5	5	5	5	5	5	5	5	5	5	5	5	5	5	5	5	5	5	5	5	3.5	4	5	5	5	5	5
562	1	2	5	5	5	1	5	5	5	5	5	5	5	5	5	5	5	5	5	5	5	5	5	5	5	5	5	5	5	5	3.16667	5	5	5	5	5	5
563	5	5	5	5	5	5	5	5	5	5	5	5	5	5	5	5	5	5	5	5	5	5	5	5	5	5	5	5	5	5	5	5	5	5	5	5	5
564	4	5	5	5	5	4	5	5	5	5	5	5	5	5	5	5	5	5	5	5	5	5	5	5	5	5	5	5	5	5	4.66667	5	5	5	5	5	5
565	4	4	5	5	5	5	5	5	5	5	5	5	5	5	5	5	5	5	5	5	5	5	5	5	5	5	5	5	5	5	4.66667	5	5	5	5	5	5
566	1	2	5	5	5	4	5	5	5	5	5	5	5	5	5	5	5	5	5	5	5	5	5	5	5	5	5	5	5	5	3.66667	5	5	5	5	5	5
567	4	4	5	5	5	3	5	5	5	5	5	5	5	5	5	5	5	5	5	5	5	5	5	5	5	5	5	5	5	5	4.33333	5	5	5	5	5	5
568	1	2	5	5	5	2	5	5	5	5	5	5	5	5	5	5	5	5	5	5	5	5	5	5	5	5	5	5	5	5	3.33333	5	5	5	5	5	5
569	1	1	5	5	5	1	5	5	5	5	5	5	5	5	5	5	5	5	5	5	5	5	5	5	5	5	5	5	5	5	3	5	5	5	5	5	5
570	4	4	5	5	5	5	5	5	5	5	5	5	5	5	5	5	5	5	5	5	5	5	5	5	5	5	5	5	5	5	4.66667	5	5	5	5	5	5
571	1	2	5	5	5	1	5	5	5	5	5	5	5	5	5	5	5	5	5	5	5	5	5	5	5	5	5	5	5	5	3.16667	5	5	5	5	5	5
572	1	2	5	5	5	1	5	5	5	5	5	5	5	5	5	5	5	5	5	5	5	5	5	5	5	5	5	5	5	5	3.16667	5	5	5	5	5	5
573	4	2	5	5	5	2	5	5	5	5	5	5	5	5	5	5	5	5	5	5	5	5	5	5	5	5	5	5	5	5	3.83333	5	5	5	5	5	5
574	5	5	5	5	5	5	5	5	5	5	5	5	5	5	5	5	5	5	5	5	5	5	5	5	4	5	5	5	5	5	5	5	5	5	5	4.66667	5
575	5	5	5	5	5	5	5	5	5	5	5	5	5	5	5	5	5	5	5	5	5	5	5	5	5	5	5	5	1	5	5	5	5	5	5	5	3.66667
576	5	5	5	5	5	5	5	5	5	4	2	4	5	5	5	5	5	5	5	5	5	5	5	5	4	5	5	5	2	5	5	4.16667	5	5	5	4.66667	4
577	5	5	5	5	5	5	5	5	5	4	5	5	5	5	5	5	5	5	5	5	5	5	5	5	5	5	5	5	3	5	5	4.83333	5	5	5	5	4.33333
578	5	5	5	5	5	5	5	5	5	4	4	4	5	4	5	5	5	5	5	5	5	5	5	5	4	5	5	5	4	5	5	4.5	5	5	4.66667	4.66667	4.66667
579	5	5	5	5	5	5	5	5	5	4	4	4	5	4	5	5	5	5	5	5	5	5	5	5	4	5	5	5	4	5	5	4.5	5	5	4.66667	4.66667	4.66667
580	5	5	5	5	5	5	5	5	5	4	4	4	4	4	5	5	5	5	5	5	5	5	5	5	4	5	5	5	4	5	5	4.5	5	5	4.33333	4.66667	4.66667
581	5	5	5	5	5	5	5	5	5	4	4	5	4	4	5	5	5	5	5	5	5	5	5	5	4	5	4	5	4	5	5	4.66667	5	5	4.33333	4.33333	4.66667
582	5	5	5	5	5	5	5	5	5	4	4	5	4	4	5	5	5	5	5	5	5	5	5	5	4	5	4	5	4	5	5	4.66667	5	5	4.33333	4.33333	4.66667
583	5	5	5	5	5	5	5	5	5	4	4	5	4	4	5	5	5	5	5	5	5	5	5	5	4	5	4	5	5	5	5	4.66667	5	5	4.33333	4.33333	5
584	5	5	5	5	5	5	5	5	5	4	4	5	4	4	5	5	5	5	5	5	5	5	5	5	5	5	4	5	5	5	5	4.66667	5	5	4.33333	4.66667	5
585	5	5	5	5	5	5	5	5	5	4	4	5	4	4	5	5	5	5	5	5	5	5	5	5	5	5	5	5	5	5	5	4.66667	5	5	4.33333	5	5
586	5	5	5	5	5	5	5	5	5	4	4	5	4	5	5	5	5	5	5	5	5	5	5	5	5	5	5	5	5	5	5	4.66667	5	5	4.66667	5	5
587	5	5	5	5	5	5	5	5	5	4	3	5	4	5	5	5	5	5	5	5	5	5	5	5	5	5	5	5	5	5	5	4.5	5	5	4.66667	5	5
588	5	5	5	5	5	5	5	5	5	4	4	5	5	5	5	5	4	4	5	5	5	5	5	5	5	5	5	5	5	5	5	4.66667	4.6	5	5	5	5
589	5	5	5	5	5	5	5	5	5	4	4	5	5	5	5	5	4	4	5	5	5	5	5	5	5	5	5	5	5	5	5	4.66667	4.6	5	5	5	5
590	5	5	5	5	5	5	5	5	5	5	5	5	5	5	5	5	4	4	5	5	5	5	5	5	5	5	5	5	5	5	5	5	4.6	5	5	5	5
591	5	5	5	5	5	5	5	5	5	5	5	5	5	5	5	5	4	3	5	5	5	5	5	5	5	5	5	5	5	5	5	5	4.4	5	5	5	5
592	5	5	5	5	5	5	5	5	5	5	5	5	5	5	5	5	4	4	5	5	5	5	5	5	5	5	5	5	5	5	5	5	4.6	5	5	5	5
593	5	5	5	5	5	5	5	5	5	5	5	5	5	5	5	5	4	4	5	5	5	5	5	5	5	5	5	5	5	5	5	5	4.6	5	5	5	5
594	5	5	5	5	5	5	5	5	5	5	5	5	5	5	5	5	5	5	5	5	5	5	5	5	5	5	5	5	5	5	5	5	5	5	5	5	5
595	5	5	5	5	5	5	5	5	5	5	5	5	5	5	5	5	4	4	5	5	5	5	5	5	5	5	5	5	5	5	5	5	4.6	5	5	5	5
596	5	5	5	5	5	5	5	5	5	5	5	5	5	5	5	5	4	5	5	5	5	5	5	5	5	5	5	5	5	5	5	5	4.8	5	5	5	5
597	5	5	5	5	5	5	5	5	5	5	5	5	5	5	5	5	3	5	5	5	5	5	5	5	5	5	5	5	5	5	5	5	4.6	5	5	5	5
598	5	5	5	5	5	5	5	5	5	5	5	5	5	5	5	5	4	5	5	5	5	5	5	5	5	5	5	5	5	4	5	5	4.8	5	5	5	4.66667
599	5	5	5	5	5	5	5	5	5	5	5	5	5	5	5	5	4	5	5	5	5	5	5	5	5	5	5	5	5	4	5	5	4.8	5	5	5	4.66667
600	5	5	5	5	5	5	5	5	5	5	5	5	5	5	5	5	4	5	5	5	5	5	5	5	5	5	5	5	5	4	5	5	4.8	5	5	5	4.66667
601	5	5	5	5	5	5	5	4	5	5	5	5	5	5	5	5	3	5	5	5	5	5	5	5	5	5	5	5	5	4	5	4.83333	4.6	5	5	5	4.66667
602	5	5	5	5	5	5	5	4	5	5	5	5	4	5	5	5	5	5	5	5	5	5	5	5	5	5	5	5	5	4	5	4.83333	5	5	4.66667	5	4.66667
603	4	4	5	5	3	4	5	4	5	5	5	5	4	5	5	5	4	5	5	5	5	5	5	5	5	5	4	5	5	4	4.16667	4.83333	4.8	5	4.66667	4.66667	4.66667
604	5	4	5	5	5	4	5	4	5	5	5	5	5	5	5	5	4	5	5	5	5	5	5	5	5	5	4	5	5	3	4.66667	4.83333	4.8	5	5	4.66667	4.33333
605	5	5	5	5	5	5	5	4	5	5	5	5	4	5	5	5	4	5	5	5	5	5	5	5	5	5	2	5	5	4	5	4.83333	4.8	5	4.66667	4	4.66667
606	5	5	5	5	5	5	5	4	5	5	5	5	4	5	5	5	4	5	5	5	2	5	5	5	5	5	4	5	5	4	5	4.83333	4.8	4.25	4.66667	4.66667	4.66667
607	5	5	5	5	5	5	5	4	5	4	4	5	4	5	5	5	3	5	5	5	1	5	5	5	5	5	5	5	5	5	5	4.5	4.6	4	4.66667	5	5
608	5	5	5	5	5	5	5	4	5	4	4	5	4	5	5	5	4	5	5	5	2	5	5	5	5	5	4	5	5	3	5	4.5	4.8	4.25	4.66667	4.66667	4.33333
609	5	5	5	5	5	5	5	4	5	4	4	5	4	5	5	5	5	5	5	5	1	5	5	5	5	5	4	5	5	4	5	4.5	5	4	4.66667	4.66667	4.66667
610	4	3	5	5	4	3	5	5	5	5	5	5	4	5	5	5	5	5	5	5	2	5	5	5	5	5	4	5	5	2	4	5	5	4.25	4.66667	4.66667	4
611	5	4	5	5	5	4	5	5	5	5	5	5	4	5	5	5	5	5	5	5	5	5	5	5	5	5	3	5	5	4	4.66667	5	5	5	4.66667	4.33333	4.66667
612	4	4	5	5	4	4	5	5	5	5	5	5	4	5	5	5	5	5	5	5	5	5	5	5	5	5	4	5	5	3	4.33333	5	5	5	4.66667	4.66667	4.33333
613	4	3	5	5	4	4	5	5	5	5	5	5	4	5	5	5	4	5	5	5	5	5	5	5	5	5	4	5	5	2	4.16667	5	4.8	5	4.66667	4.66667	4
614	5	5	5	5	5	5	5	5	5	5	5	5	5	5	5	5	5	5	5	5	5	5	5	5	5	5	4	5	5	5	5	5	5	5	5	4.66667	5
615	5	5	5	5	5	5	5	5	5	5	5	5	5	5	5	5	4	5	5	5	5	5	5	5	5	5	5	5	5	5	5	5	4.8	5	5	5	5
616	5	5	5	5	5	5	5	5	5	5	5	5	5	5	5	5	4	5	5	5	5	5	5	5	5	5	3	5	5	5	5	5	4.8	5	5	4.33333	5
617	5	5	5	5	5	5	5	5	5	5	5	5	5	5	5	5	5	5	5	5	5	5	5	5	5	5	3	5	5	5	5	5	5	5	5	4.33333	5
618	5	5	5	5	5	5	5	5	5	5	5	5	5	5	5	5	4	5	5	5	5	5	4	5	5	5	4	5	5	5	5	5	4.8	4.75	5	4.66667	5
619	5	5	5	5	5	5	5	4	4	5	5	5	4	4	4	4	4	4	5	5	5	5	5	4	4	5	5	5	5	5	5	4.66667	4.4	4.75	4	4.66667	5
620	5	5	5	5	5	5	5	4	4	5	5	4	4	4	4	4	4	4	5	5	5	5	5	4	4	5	5	5	5	5	5	4.5	4.4	4.75	4	4.66667	5
621	5	5	5	5	5	5	5	4	4	5	5	4	4	4	4	4	5	4	5	5	5	5	5	4	4	5	5	5	5	5	5	4.5	4.6	4.75	4	4.66667	5
622	5	5	5	5	5	5	5	4	4	5	5	5	4	5	4	4	5	4	5	5	5	5	5	5	5	5	5	5	5	5	5	4.66667	4.6	5	4.33333	5	5
623	5	5	5	5	5	5	5	4	5	5	5	5	5	5	4	4	5	5	5	5	5	5	5	5	5	5	5	5	5	5	5	4.83333	4.8	5	4.66667	5	5
624	5	5	5	5	5	5	5	4	5	5	5	5	5	5	4	4	5	5	5	5	5	5	5	5	5	5	5	5	5	5	5	4.83333	4.8	5	4.66667	5	5
625	5	5	5	5	5	5	5	4	5	5	5	5	5	5	4	4	5	5	5	5	5	5	5	5	5	5	5	5	5	5	5	4.83333	4.8	5	4.66667	5	5
626	5	5	5	5	5	5	5	4	5	5	5	5	5	5	5	5	5	5	5	5	5	5	5	5	5	5	5	5	5	5	5	4.83333	5	5	5	5	5
627	5	5	5	5	5	5	5	4	5	5	5	5	5	5	5	5	5	5	5	5	5	5	5	5	5	5	5	5	5	5	5	4.83333	5	5	5	5	5
628	5	5	5	5	5	5	5	4	5	5	5	5	5	5	5	5	5	5	5	5	5	5	5	5	5	5	5	5	5	5	5	4.83333	5	5	5	5	5
629	5	5	5	5	5	4	5	5	5	5	5	5	5	5	5	5	5	5	5	5	5	5	5	5	5	5	5	5	5	5	4.83333	5	5	5	5	5	5
630	5	5	5	5	5	4	5	4	5	5	5	5	5	5	5	5	5	5	5	5	5	5	5	5	5	5	5	5	5	5	4.83333	4.83333	5	5	5	5	5
631	5	5	5	5	5	4	5	4	5	5	5	5	5	5	5	5	5	5	5	5	5	5	5	5	5	5	5	5	5	5	4.83333	4.83333	5	5	5	5	5
632	5	5	5	5	5	4	5	5	5	5	5	5	5	5	5	5	5	5	5	5	5	5	5	5	5	5	5	5	5	5	4.83333	5	5	5	5	5	5
633	5	5	3	5	5	4	5	4	5	5	5	5	5	5	5	5	5	5	5	5	5	5	5	5	5	5	5	5	5	5	4.5	4.83333	5	5	5	5	5
634	5	5	5	5	5	4	5	4	5	5	5	5	5	5	5	5	5	5	5	5	5	5	5	5	5	5	5	5	5	5	4.83333	4.83333	5	5	5	5	5
635	5	5	5	5	5	4	3	4	5	5	4	5	5	5	5	5	4	4	5	5	4	5	5	5	5	5	5	5	5	5	4.83333	4.33333	4.6	4.75	5	5	5
636	5	5	5	5	5	4	5	5	5	5	4	5	5	5	5	5	4	4	5	5	4	5	5	5	5	5	5	5	5	5	4.83333	4.83333	4.6	4.75	5	5	5
637	5	5	5	5	3	4	4	4	5	5	4	5	5	5	5	5	5	4	5	5	4	5	5	5	5	5	5	5	5	5	4.5	4.5	4.8	4.75	5	5	5
638	5	5	5	5	5	4	5	5	5	5	5	5	5	5	5	5	5	5	5	5	4	5	5	5	5	5	5	5	5	5	4.83333	5	5	4.75	5	5	5
639	5	5	5	5	5	4	3	3	5	5	5	5	5	5	5	5	5	5	5	5	5	5	5	5	5	5	5	5	5	5	4.83333	4.33333	5	5	5	5	5
640	5	5	5	5	5	5	5	5	5	5	5	5	5	5	5	5	5	5	5	5	5	5	5	5	5	5	5	5	5	5	5	5	5	5	5	5	5
641	5	5	5	5	5	5	5	4	5	5	4	5	5	5	5	5	5	5	5	5	5	5	5	5	5	5	5	5	5	5	5	4.66667	5	5	5	5	5
642	5	5	5	5	5	5	5	5	5	5	4	5	5	5	5	5	5	5	5	5	5	5	5	5	5	5	5	5	5	5	5	4.83333	5	5	5	5	5
643	5	5	5	5	5	5	5	5	5	5	4	5	5	5	5	5	5	5	5	5	5	5	5	5	5	5	5	5	5	5	5	4.83333	5	5	5	5	5
644	5	5	5	5	5	5	5	5	5	5	4	5	5	5	5	5	5	5	5	5	5	5	5	5	5	5	5	5	5	5	5	4.83333	5	5	5	5	5
645	5	5	5	5	5	5	3	3	5	5	4	5	5	5	5	5	5	5	5	5	5	5	5	5	5	5	5	5	5	5	5	4.16667	5	5	5	5	5
646	5	5	5	5	5	5	4	4	5	5	4	5	5	5	5	5	5	5	5	5	5	5	5	5	5	5	5	5	5	5	5	4.5	5	5	5	5	5
647	5	5	5	5	5	5	3	3	5	5	3	5	5	5	5	5	5	5	5	5	5	4	5	5	5	5	5	5	5	5	5	4	5	4.75	5	5	5
648	5	5	3	5	5	5	5	5	5	5	5	5	5	5	5	5	5	5	5	5	5	4	5	5	5	5	5	5	5	5	4.66667	5	5	4.75	5	5	5
649	5	5	5	5	5	5	4	4	4	4	4	5	5	5	4	5	4	5	5	5	5	5	4	4	5	5	5	2	5	4	5	4.16667	4.8	4.5	4.66667	5	3.66667
650	5	5	5	5	5	5	5	5	5	5	4	5	5	5	5	5	4	5	5	5	5	5	4	4	5	5	5	5	5	5	5	4.83333	4.8	4.5	5	5	5
651	5	5	5	5	5	5	4	4	4	4	4	5	5	5	4	5	4	5	5	4	5	5	2	2	5	5	5	4	5	2	5	4.16667	4.6	3.5	4.66667	5	3.66667
652	5	5	5	5	5	5	2	4	4	3	4	5	5	5	3	5	4	5	5	4	5	5	3	3	5	5	5	4	5	4	5	3.66667	4.6	4	4.33333	5	4.33333
653	5	5	5	5	5	5	5	4	4	4	4	5	5	5	5	5	5	5	5	5	5	5	5	4	5	5	5	3	5	4	5	4.33333	5	4.75	5	5	4
654	5	5	5	5	5	5	5	5	5	4	4	5	5	5	4	5	2	5	5	4	5	5	4	1	5	5	5	4	5	4	5	4.66667	4.2	3.75	4.66667	5	4.33333
655	5	5	5	5	5	5	5	5	5	5	4	5	5	5	5	5	4	5	5	4	5	5	1	1	5	5	5	3	5	4	5	4.83333	4.6	3	5	5	4
656	5	5	5	5	5	5	5	5	5	3	3	5	5	5	5	5	5	5	5	5	5	5	2	3	5	5	5	3	5	3	5	4.33333	5	3.75	5	5	3.66667
657	5	5	5	5	5	5	5	5	5	5	4	5	5	5	4	5	4	5	5	4	5	5	4	4	5	5	5	1	5	4	5	4.83333	4.6	4.5	4.66667	5	3.33333
658	5	5	5	5	5	4	5	5	5	4	5	5	5	5	5	5	5	5	5	5	5	5	5	4	5	5	5	4	5	4	4.83333	4.83333	5	4.75	5	5	4.33333
659	5	4	4	5	4	3	5	5	5	3	5	5	5	5	3	5	3	5	5	3	5	5	2	2	5	5	5	4	5	3	4.16667	4.66667	4.2	3.5	4.33333	5	4
660	5	5	4	5	5	4	5	5	5	4	5	5	5	5	5	5	3	5	5	4	4	5	3	1	5	5	5	5	5	5	4.66667	4.83333	4.4	3.25	5	5	5
661	5	2	4	5	5	5	5	5	5	5	5	5	5	5	5	5	5	5	5	5	5	4	1	1	5	5	5	3	5	4	4.33333	5	5	2.75	5	5	4
662	5	2	2	5	4	4	5	5	5	4	4	5	5	5	5	5	5	5	5	4	5	5	2	1	5	5	5	3	5	2	3.66667	4.66667	4.8	3.25	5	5	3.33333
663	5	5	5	5	5	5	5	5	5	4	4	5	5	5	5	5	2	5	5	2	5	5	1	1	5	5	5	4	5	2	5	4.66667	3.8	3	5	5	3.66667
664	5	5	5	5	5	5	5	5	5	5	4	4	5	5	5	5	2	5	5	3	5	5	2	2	5	5	5	2	5	2	5	4.66667	4	3.5	5	5	3
665	5	5	5	5	5	5	5	5	5	2	1	4	5	5	5	5	4	5	5	4	5	5	4	4	5	5	5	5	5	4	5	3.66667	4.6	4.5	5	5	4.66667
666	5	5	5	5	5	5	5	5	5	4	5	4	5	5	5	5	5	5	5	4	5	5	2	2	5	5	5	2	5	2	5	4.66667	4.8	3.5	5	5	3
667	5	5	5	5	5	5	5	5	5	4	3	5	5	5	5	5	5	5	5	3	5	5	4	3	5	5	5	4	5	4	5	4.5	4.6	4.25	5	5	4.33333
668	5	5	5	5	5	5	4	5	5	2	4	4	5	5	5	5	2	5	5	1	5	5	1	1	5	5	5	4	5	4	5	4	3.6	3	5	5	4.33333
669	5	5	5	5	5	5	1	5	5	1	1	1	5	5	5	5	5	5	5	5	5	5	5	4	5	5	5	3	5	2	5	2.33333	5	4.75	5	5	3.33333
670	5	5	5	5	5	5	3	5	5	4	5	4	5	5	5	5	4	5	5	4	5	5	2	1	5	5	5	3	5	4	5	4.33333	4.6	3.25	5	5	4
671	5	5	5	5	5	5	5	5	5	5	5	5	5	5	5	5	1	5	5	5	5	5	1	1	5	5	5	1	5	3	5	5	4.2	3	5	5	3
672	5	5	5	5	5	5	5	5	5	5	5	5	5	5	5	5	4	5	5	3	5	5	3	3	5	5	5	1	5	3	5	5	4.4	4	5	5	3
673	5	5	5	5	5	5	5	5	5	5	5	5	5	5	5	5	4	3	5	3	5	5	1	2	5	5	5	4	5	4	5	5	4	3.25	5	5	4.33333
674	5	5	5	5	5	5	5	5	5	5	5	5	4	5	5	2	2	2	5	2	5	5	2	2	5	5	5	4	5	4	5	5	2.6	3.5	4.66667	5	4.33333
675	5	5	5	5	5	5	5	5	5	5	5	5	5	5	5	5	5	4	5	5	5	5	1	4	5	5	5	5	5	3	5	5	4.8	3.75	5	5	4.33333
676	5	5	5	5	5	5	5	5	5	5	5	5	2	2	1	4	4	4	5	4	5	5	4	2	5	5	5	4	5	4	5	5	4.2	4	1.66667	5	4.33333
677	5	5	5	5	5	5	5	5	5	5	5	5	4	2	2	2	2	2	5	2	5	5	2	2	5	5	5	1	5	2	5	5	2.6	3.5	2.66667	5	2.66667
678	5	5	5	5	5	5	5	5	5	5	5	5	5	5	5	2	2	2	5	3	5	5	5	5	5	5	5	5	5	5	5	5	2.8	5	5	5	5
679	5	5	5	5	5	5	5	5	5	5	5	5	4	5	3	4	5	4	5	5	5	5	3	5	5	5	5	4	5	5	5	5	4.6	4.5	4	5	4.66667
680	5	4	3	5	3	3	5	5	5	5	5	5	3	2	3	2	3	3	5	2	5	5	3	4	5	5	5	3	5	5	3.83333	5	3	4.25	2.66667	5	4.33333
681	5	5	3	5	5	4	5	5	5	5	5	5	5	5	5	4	5	4	5	4	5	5	5	5	5	5	5	2	5	5	4.5	5	4.4	5	5	5	4
682	5	4	3	5	5	5	5	5	5	5	5	5	2	2	3	3	4	4	5	3	5	5	4	1	5	5	5	1	5	5	4.5	5	3.8	3.75	2.33333	5	3.66667
683	5	4	4	5	4	4	5	5	5	5	5	5	3	2	2	4	4	4	5	4	5	5	4	4	5	5	5	2	5	5	4.33333	5	4.2	4.5	2.33333	5	4
684	5	3	2	5	5	4	5	5	5	5	5	5	4	5	3	4	5	3	5	3	5	5	2	3	5	5	5	3	5	5	4	5	4	3.75	4	5	4.33333
685	5	5	5	5	5	5	5	5	5	5	5	5	4	4	4	4	4	4	5	4	5	5	5	5	5	5	5	4	5	5	5	5	4.2	5	4	5	4.66667
686	5	5	5	5	5	5	5	5	5	5	5	5	4	4	4	4	4	4	5	5	5	5	5	5	5	5	5	3	5	5	5	5	4.4	5	4	5	4.33333
687	5	5	5	5	5	5	5	5	5	5	5	5	4	4	4	3	4	4	5	5	4	4	5	5	5	5	5	4	5	5	5	5	4.2	4.5	4	5	4.66667
688	5	5	5	5	5	5	5	5	5	5	5	5	4	4	4	4	4	4	5	5	5	5	5	5	5	5	5	3	5	5	5	5	4.4	5	4	5	4.33333
689	5	5	5	5	5	5	5	5	5	5	5	5	4	4	4	4	4	3	5	5	5	4	4	5	5	5	5	4	5	5	5	5	4.2	4.5	4	5	4.66667
690	5	5	5	5	5	5	5	5	5	5	5	5	5	5	5	5	5	5	5	4	5	5	5	5	5	5	5	5	5	5	5	5	4.8	5	5	5	5
691	5	5	5	5	5	5	5	5	5	5	5	5	4	4	4	4	4	4	5	5	5	5	5	5	5	5	5	5	5	5	5	5	4.4	5	4	5	5
692	5	5	5	5	5	5	5	5	5	5	5	5	4	4	4	4	4	4	5	5	5	5	5	5	5	5	5	5	5	5	5	5	4.4	5	4	5	5
693	5	5	5	3	5	3	5	5	5	5	5	5	5	4	5	3	5	5	5	5	5	5	5	5	5	5	5	5	5	5	4.33333	5	4.6	5	4.66667	5	5
694	2	5	5	5	5	5	5	5	2	5	5	5	4	4	5	4	5	5	5	5	5	4	4	5	5	3	4	5	5	5	4.5	4.5	4.8	4.5	4.33333	4	5
695	5	5	4	5	3	5	5	3	5	5	5	5	3	5	5	4	5	5	5	5	4	5	5	5	5	5	4	5	5	5	4.5	4.66667	4.8	4.75	4.33333	4.66667	5
696	5	3	5	5	3	5	4	5	5	5	5	5	5	5	4	4	5	5	5	5	5	5	5	5	5	4	5	5	5	5	4.33333	4.83333	4.8	5	4.66667	4.66667	5
697	3	5	5	5	5	5	5	5	5	5	5	5	5	5	5	5	5	3	5	5	5	4	5	5	5	5	5	5	5	5	4.66667	5	4.6	4.75	5	5	5
698	5	2	2	5	3	2	5	5	5	5	5	4	5	5	4	3	5	5	5	5	5	5	5	5	5	5	5	5	5	5	3.16667	4.83333	4.6	5	4.66667	5	5
699	5	5	5	5	3	5	5	5	5	5	5	4	5	5	5	5	5	5	5	5	5	5	5	5	5	5	5	5	5	5	4.66667	4.83333	5	5	5	5	5
700	5	5	5	5	5	5	5	5	5	5	5	4	3	5	5	5	5	5	5	5	5	5	5	5	5	5	5	5	4	5	5	4.83333	5	5	4.33333	5	4.66667
701	5	5	5	5	3	5	5	5	5	5	5	4	5	5	5	5	5	5	5	5	4	5	5	5	5	5	5	5	4	5	4.66667	4.83333	5	4.75	5	5	4.66667
702	5	5	5	4	3	5	5	5	5	5	5	4	5	4	5	5	4	5	5	5	5	5	5	5	5	5	5	5	4	5	4.5	4.83333	4.8	5	4.66667	5	4.66667
703	5	5	5	5	4	5	4	5	5	5	5	5	5	5	5	5	5	5	5	5	5	5	5	5	5	5	5	5	5	5	4.83333	4.83333	5	5	5	5	5
704	2	5	5	5	5	5	5	5	5	4	4	4	5	5	4	5	5	5	5	5	5	5	5	5	5	5	5	5	4	4	4.5	4.5	5	5	4.66667	5	4.33333
705	5	5	5	5	5	5	5	5	5	5	5	4	5	4	5	5	5	5	5	5	5	5	5	5	5	5	5	5	5	4	5	4.83333	5	5	4.66667	5	4.66667
706	5	4	4	5	4	5	5	5	5	5	5	4	5	5	5	5	5	5	5	5	5	5	5	5	5	5	5	5	4	5	4.5	4.83333	5	5	5	5	4.66667
707	4	3	3	5	3	4	5	5	4	4	4	4	4	5	3	5	5	5	5	5	5	5	5	5	5	5	5	5	2	4	3.66667	4.33333	5	5	4	5	3.66667
708	5	3	4	5	4	4	4	3	4	4	4	4	4	5	5	5	2	2	5	5	1	5	5	5	5	5	4	5	3	5	4.16667	3.83333	3.8	4	4.66667	4.66667	4.33333
709	5	5	5	5	5	5	4	5	5	4	5	4	4	5	5	5	4	4	4	4	4	4	5	5	5	5	5	5	4	4	5	4.5	4.2	4.5	4.66667	5	4.33333
710	5	5	5	5	5	5	4	5	5	4	5	4	4	5	5	4	4	4	4	4	4	4	5	5	5	5	5	5	4	4	5	4.5	4	4.5	4.66667	5	4.33333
711	5	5	5	5	5	5	4	5	5	4	5	4	4	5	5	4	4	4	4	4	5	4	5	5	5	5	5	5	4	4	5	4.5	4	4.75	4.66667	5	4.33333
712	5	5	5	5	5	5	4	5	5	4	5	4	4	5	5	5	4	5	4	4	5	4	5	5	5	5	5	5	5	5	5	4.5	4.4	4.75	4.66667	5	5
713	5	5	5	5	5	5	4	5	5	4	5	4	5	5	5	5	5	5	4	4	5	5	5	5	5	5	5	5	5	5	5	4.5	4.6	5	5	5	5
714	5	5	5	5	5	5	4	5	5	4	5	4	5	5	5	5	5	5	4	4	5	5	5	5	5	5	5	5	5	5	5	4.5	4.6	5	5	5	5
715	5	5	5	5	5	5	4	5	5	4	5	4	5	5	5	5	5	5	4	4	5	5	5	5	5	5	5	5	5	5	5	4.5	4.6	5	5	5	5
716	5	5	5	5	5	5	4	5	5	4	5	4	5	5	5	5	5	5	5	5	5	5	5	5	5	5	5	5	3	5	5	4.5	5	5	5	5	4.33333
717	5	5	5	5	5	5	4	5	5	4	5	4	5	5	5	5	5	5	5	5	5	5	5	5	5	5	5	5	5	5	5	4.5	5	5	5	5	5
718	5	5	5	3	5	5	4	5	5	4	5	4	5	5	5	5	5	5	5	5	5	5	5	5	5	5	5	5	5	5	4.66667	4.5	5	5	5	5	5
719	5	5	5	5	5	5	4	5	5	4	5	5	5	5	5	5	5	5	5	5	5	5	5	5	5	5	5	5	5	5	5	4.66667	5	5	5	5	5
720	4	3	3	5	4	4	5	5	5	5	5	4	5	5	5	5	5	5	5	5	5	5	5	5	5	5	5	5	5	5	3.83333	4.83333	5	5	5	5	5
721	5	5	5	5	5	5	5	5	5	5	5	4	5	5	5	5	5	5	5	5	5	5	5	5	5	5	5	5	5	5	5	4.83333	5	5	5	5	5
722	5	5	5	5	5	5	5	5	5	5	5	5	5	5	5	5	5	5	5	5	5	5	5	5	5	5	5	5	5	5	5	5	5	5	5	5	5
723	5	5	5	5	5	5	5	5	5	5	5	4	5	5	5	5	5	5	5	5	5	5	5	5	5	5	5	5	5	5	5	4.83333	5	5	5	5	5
724	5	5	5	5	5	5	5	5	5	5	5	4	5	5	5	5	5	5	5	5	5	5	5	5	5	5	5	5	5	5	5	4.83333	5	5	5	5	5
725	5	5	5	5	5	5	5	5	5	5	5	4	5	5	5	5	5	5	5	5	5	5	5	5	5	5	5	5	5	5	5	4.83333	5	5	5	5	5
726	3	3	4	2	5	4	5	5	5	5	5	4	5	5	5	4	5	5	5	5	5	5	5	5	5	5	5	5	5	5	3.5	4.83333	4.8	5	5	5	5
727	5	5	5	5	5	5	5	5	5	5	5	4	5	5	5	4	5	5	5	5	5	5	5	5	5	5	4	5	5	5	5	4.83333	4.8	5	5	4.66667	5
728	5	5	5	5	5	5	5	5	5	5	5	5	5	5	5	4	5	5	5	5	5	5	5	5	5	5	4	5	5	5	5	5	4.8	5	5	4.66667	5
729	4	3	4	5	5	4	5	5	5	5	5	4	4	5	5	4	5	5	5	5	5	5	5	5	5	5	4	5	5	5	4.16667	4.83333	4.8	5	4.66667	4.66667	5
730	5	5	5	5	5	4	5	5	5	5	5	4	4	5	5	4	5	5	5	5	5	5	5	5	5	5	5	5	5	5	4.83333	4.83333	4.8	5	4.66667	5	5
731	4	4	4	5	5	4	5	5	5	5	5	5	4	5	5	4	5	5	5	5	5	5	5	5	5	5	4	5	5	5	4.33333	5	4.8	5	4.66667	4.66667	5
732	5	5	5	5	5	5	5	5	5	5	5	5	5	5	5	4	5	5	5	5	5	5	5	5	5	5	4	5	5	5	5	5	4.8	5	5	4.66667	5
733	4	3	3	5	5	5	5	5	5	5	5	5	5	5	5	5	5	5	5	5	5	5	5	5	5	5	5	5	5	5	4.16667	5	5	5	5	5	5
734	5	5	5	5	5	5	5	5	5	5	5	5	5	5	5	5	5	5	5	5	5	5	5	5	5	5	5	5	5	5	5	5	5	5	5	5	5
735	5	5	4	5	5	4	5	5	5	5	5	5	5	5	5	5	5	5	5	5	5	5	5	5	5	5	5	5	5	5	4.66667	5	5	5	5	5	5
736	5	5	5	5	5	4	5	5	5	5	5	5	5	5	5	5	5	5	5	5	5	5	5	5	5	5	5	5	5	5	4.83333	5	5	5	5	5	5
737	5	5	5	5	5	4	5	5	5	5	5	5	5	5	5	5	5	5	5	5	5	5	5	5	5	5	5	5	5	5	4.83333	5	5	5	5	5	5
738	5	5	5	5	5	4	5	5	5	5	5	5	5	5	5	5	5	5	5	5	5	5	5	5	5	5	5	5	5	5	4.83333	5	5	5	5	5	5
739	4	3	3	5	5	4	5	5	5	5	5	5	5	5	5	5	5	5	5	5	5	5	5	5	5	5	5	5	4	5	4	5	5	5	5	5	4.66667
740	5	4	4	5	5	4	5	5	5	5	5	5	5	5	5	5	5	5	5	5	5	5	5	5	5	5	5	5	4	5	4.5	5	5	5	5	5	4.66667
741	2	3	3	5	5	3	5	5	5	5	5	5	5	5	5	5	4	5	5	5	5	5	5	5	5	5	5	5	3	5	3.5	5	4.8	5	5	5	4.33333
742	5	5	5	5	5	5	5	5	5	5	5	5	5	5	5	5	4	5	5	5	5	5	5	5	5	5	5	5	4	5	5	5	4.8	5	5	5	4.66667
743	4	5	5	5	5	4	5	5	5	5	5	5	5	5	5	5	5	5	5	5	5	5	5	5	5	5	5	5	5	5	4.66667	5	5	5	5	5	5
744	4	3	4+H37:H112	5	5	5	5	5	5	5	5	5	5	5	5	5	5	5	5	5	5	5	5	5	5	5	5	5	3	5	4.4	5	5	5	5	5	4.33333
745	3	3	4	5	5	4	5	5	5	5	5	5	5	5	5	5	5	5	5	5	5	5	5	5	5	5	5	5	3	5	4	5	5	5	5	5	4.33333
746	4	3	4	5	5	4	5	5	5	5	5	5	5	5	5	5	4	5	5	5	5	5	5	5	5	5	5	5	1	5	4.16667	5	4.8	5	5	5	3.66667
747	4	4	4	5	5	5	5	5	5	5	5	5	5	4	5	5	4	5	5	5	5	5	5	5	5	5	5	5	4	5	4.5	5	4.8	5	4.66667	5	4.66667
748	5	5	5	5	5	4	5	5	5	5	5	5	5	5	5	5	5	5	5	5	5	5	5	5	5	5	5	5	5	5	4.83333	5	5	5	5	5	5
749	5	4	4	5	5	5	5	5	5	5	5	5	5	4	4	5	4	5	5	5	5	5	5	5	5	5	5	5	3	5	4.66667	5	4.8	5	4.33333	5	4.33333
750	4	3	3	5	5	4	5	5	5	5	5	5	5	4	5	5	4	5	5	5	5	5	5	5	5	5	5	5	4	5	4	5	4.8	5	4.66667	5	4.66667
751	5	5	5	5	5	5	5	5	5	5	5	5	5	4	4	5	4	5	5	5	5	5	5	5	5	5	5	5	4	5	5	5	4.8	5	4.33333	5	4.66667
752	5	5	5	5	5	5	5	5	5	5	5	4	5	5	4	5	3	5	5	5	5	5	5	5	5	5	5	5	4	5	5	4.83333	4.6	5	4.66667	5	4.66667
753	5	5	5	5	5	5	5	5	5	5	5	5	5	5	5	5	5	5	5	5	5	5	5	5	5	5	5	5	3	5	5	5	5	5	5	5	4.33333
754	5	5	5	5	5	5	5	5	5	5	5	4	5	5	4	5	5	5	5	5	5	5	5	5	5	5	5	5	4	5	5	4.83333	5	5	4.66667	5	4.66667
755	5	5	5	5	5	5	5	5	5	5	5	5	5	5	5	5	5	5	5	5	5	5	5	5	5	5	5	5	4	5	5	5	5	5	5	5	4.66667
756	5	5	5	5	5	5	5	5	5	5	5	4	5	5	5	5	2	5	5	5	5	5	5	5	5	5	5	5	2	5	5	4.83333	4.4	5	5	5	4
757	5	5	5	5	5	5	5	5	5	5	5	4	5	5	5	5	5	5	5	5	5	5	5	5	5	5	5	5	5	5	5	4.83333	5	5	5	5	5
758	5	5	5	5	5	5	5	5	5	5	5	4	5	5	5	5	5	5	5	5	5	5	5	5	5	5	5	5	5	5	5	4.83333	5	5	5	5	5
759	5	5	5	5	5	5	5	5	5	5	5	5	5	5	5	5	3	5	5	5	5	5	5	5	5	5	5	5	5	5	5	5	4.6	5	5	5	5
760	5	5	5	5	5	5	5	5	5	5	5	5	5	5	5	5	4	5	5	5	5	5	5	5	5	5	5	5	5	5	5	5	4.8	5	5	5	5
761	5	5	5	5	5	5	5	5	5	5	5	4	5	5	5	5	5	4	5	5	5	5	5	5	5	5	5	5	5	5	5	4.83333	4.8	5	5	5	5
762	5	5	5	5	5	5	5	5	5	5	5	4	5	5	5	5	4	4	5	5	5	5	5	5	5	5	5	5	5	5	5	4.83333	4.6	5	5	5	5
763	5	5	5	5	5	5	5	5	5	5	5	5	5	5	5	5	5	4	5	5	5	5	5	5	5	5	5	5	5	5	5	5	4.8	5	5	5	5
764	5	5	5	5	5	5	3	4	5	5	5	2	5	5	5	5	4	3	5	5	5	5	5	5	5	5	5	5	5	5	5	4	4.4	5	5	5	5
765	5	5	5	5	5	5	5	4	5	5	5	4	5	5	5	5	4	4	5	5	5	5	5	5	5	5	5	5	5	5	5	4.66667	4.6	5	5	5	5
766	5	5	5	5	5	5	5	5	5	5	5	5	5	5	5	5	5	5	5	5	5	5	5	5	5	5	5	5	5	5	5	5	5	5	5	5	5
767	4	4	3	5	5	4	4	4	5	5	5	4	5	5	5	5	4	2	5	5	5	5	5	5	5	5	5	5	5	5	4.16667	4.5	4.2	5	5	5	5
768	5	5	5	5	5	5	5	4	5	5	5	5	5	5	5	5	4	4	5	5	5	5	5	5	5	5	5	5	5	5	5	4.83333	4.6	5	5	5	5
769	4	4	4	5	5	5	4	5	5	5	5	5	5	5	5	5	5	2	5	5	5	5	5	5	5	5	5	5	5	5	4.5	4.83333	4.4	5	5	5	5
770	5	5	5	5	5	5	5	5	5	5	5	5	5	5	5	5	4	4	5	5	5	5	5	5	5	5	5	5	5	5	5	5	4.6	5	5	5	5
771	5	5	5	5	5	5	5	5	5	5	5	5	5	5	5	5	5	4	5	5	5	5	5	5	5	5	5	5	5	5	5	5	4.8	5	5	5	5
772	5	5	4	5	5	5	5	5	5	5	5	5	5	5	5	5	5	5	5	5	5	5	5	5	5	5	5	5	5	5	4.83333	5	5	5	5	5	5
773	5	5	5	5	5	5	5	4	4	4	5	5	5	5	5	5	4	4	5	5	5	5	5	5	5	5	5	5	5	5	5	4.5	4.6	5	5	5	5
774	5	5	5	5	5	5	2	2	4	4	5	5	5	5	4	5	4	4	5	5	5	5	5	5	5	5	5	5	5	5	5	3.66667	4.6	5	4.66667	5	5
775	5	5	5	5	5	5	5	5	5	5	5	5	5	5	1	5	4	4	5	5	5	5	5	5	2	5	5	5	5	5	5	5	4.6	5	3.66667	4	5
776	5	5	5	5	5	5	5	5	5	5	5	5	5	5	5	5	2	2	5	5	5	5	5	5	4	5	5	5	5	5	5	5	3.8	5	5	4.66667	5
777	5	5	5	5	5	5	5	5	5	5	5	5	5	5	5	5	4	5	5	5	5	5	5	5	3	5	5	5	5	5	5	5	4.8	5	5	4.33333	5
778	5	5	5	5	5	5	5	5	5	5	5	5	5	5	5	5	5	5	5	5	5	5	5	5	4	5	5	5	5	5	5	5	5	5	5	4.66667	5
779	5	5	5	5	5	5	5	5	5	5	5	5	5	5	5	5	5	5	5	5	3	5	5	5	1	5	5	5	5	5	5	5	5	4.5	5	3.66667	5
780	5	5	5	5	5	5	5	5	5	5	5	5	5	5	5	5	5	5	5	5	3	5	5	5	3	5	5	5	5	5	5	5	5	4.5	5	4.33333	5
781	5	5	5	5	5	5	5	5	5	5	5	5	5	5	5	5	5	5	5	5	5	5	5	5	5	5	5	5	5	5	5	5	5	5	5	5	5
782	5	5	5	5	5	5	5	5	5	5	5	5	5	5	5	5	5	5	5	5	4	5	5	5	2	5	5	5	5	5	5	5	5	4.75	5	4	5
783	5	5	5	5	5	5	5	5	5	5	5	5	5	5	5	5	5	5	5	5	2	5	5	5	4	5	5	5	5	5	5	5	5	4.25	5	4.66667	5
784	5	5	5	5	5	5	5	5	5	5	5	5	5	5	5	5	5	5	5	5	5	5	5	5	4	5	5	5	2	5	5	5	5	5	5	4.66667	4
785	5	5	5	5	5	5	5	5	5	5	5	5	5	5	5	5	5	5	5	5	5	5	5	5	4	5	5	5	4	5	5	5	5	5	5	4.66667	4.66667
786	5	5	5	5	5	5	5	5	5	5	5	5	5	5	5	5	5	5	5	5	5	5	5	5	5	5	5	5	4	5	5	5	5	5	5	5	4.66667
787	5	5	5	5	5	5	5	5	5	5	5	5	5	5	5	5	5	5	5	5	5	5	5	5	4	5	5	5	4	5	5	5	5	5	5	4.66667	4.66667
788	5	5	5	5	5	5	5	5	5	5	5	5	5	5	5	5	5	5	5	5	5	5	5	5	5	5	5	5	2	5	5	5	5	5	5	5	4
789	5	5	5	5	5	5	5	5	5	5	5	5	5	5	5	5	5	5	5	5	5	5	5	5	5	5	5	5	3	5	5	5	5	5	5	5	4.33333
790	5	5	5	5	5	5	5	5	5	5	5	5	5	5	5	5	5	5	5	5	5	5	5	5	5	5	5	5	2	5	5	5	5	5	5	5	4
791	5	5	5	5	5	5	3	5	5	4	5	5	5	5	5	5	5	5	5	5	5	5	5	5	5	5	5	5	5	5	5	4.5	5	5	5	5	5
792	5	5	5	5	5	5	5	5	5	5	5	5	5	4	4	5	5	5	5	5	5	5	5	5	5	5	5	5	5	5	5	5	5	5	4.33333	5	5
793	5	5	5	5	5	5	4	5	5	3	5	5	5	5	4	5	5	5	5	5	5	5	5	5	5	5	5	5	5	5	5	4.5	5	5	4.66667	5	5
794	5	5	5	5	5	5	5	5	5	4	5	5	5	4	4	5	5	5	5	5	5	5	5	5	5	5	5	5	5	5	5	4.83333	5	5	4.33333	5	5
795	5	4	5	5	5	4	4	5	5	4	5	5	5	5	4	5	5	5	5	5	5	5	5	5	5	5	5	5	5	5	4.66667	4.66667	5	5	4.66667	5	5
796	4	4	3	5	5	4	4	5	5	4	5	5	5	5	4	5	5	5	5	5	5	5	5	5	5	5	5	5	5	5	4.16667	4.66667	5	5	4.66667	5	5
797	1	2	5	5	5	3	2	5	5	2	5	5	5	5	5	5	5	5	5	5	5	5	5	5	5	5	5	5	5	5	3.5	4	5	5	5	5	5
798	1	2	5	5	5	1	5	5	5	5	5	5	5	5	5	5	5	5	5	5	5	5	5	5	5	5	5	5	5	5	3.16667	5	5	5	5	5	5
799	5	5	5	5	5	5	5	5	5	5	5	5	5	5	5	5	5	5	5	5	5	5	5	5	5	5	5	5	5	5	5	5	5	5	5	5	5
800	4	5	5	5	5	4	5	5	5	5	5	5	5	5	5	5	5	5	5	5	5	5	5	5	5	5	5	5	5	5	4.66667	5	5	5	5	5	5
801	4	4	5	5	5	5	5	5	5	5	5	5	5	5	5	5	5	5	5	5	5	5	5	5	5	5	5	5	5	5	4.66667	5	5	5	5	5	5
802	1	2	5	5	5	4	5	5	5	5	5	5	5	5	5	5	5	5	5	5	5	5	5	5	5	5	5	5	5	5	3.66667	5	5	5	5	5	5
803	4	4	5	5	5	3	5	5	5	5	5	5	5	5	5	5	5	5	5	5	5	5	5	5	5	5	5	5	5	5	4.33333	5	5	5	5	5	5
804	1	2	5	5	5	2	5	5	5	5	5	5	5	5	5	5	5	5	5	5	5	5	5	5	5	5	5	5	5	5	3.33333	5	5	5	5	5	5
805	1	1	5	5	5	1	5	5	5	5	5	5	5	5	5	5	5	5	5	5	5	5	5	5	5	5	5	5	5	5	3	5	5	5	5	5	5
806	4	4	5	5	5	5	5	5	5	5	5	5	5	5	5	5	5	5	5	5	5	5	5	5	5	5	5	5	5	5	4.66667	5	5	5	5	5	5
807	1	2	5	5	5	1	5	5	5	5	5	5	5	5	5	5	5	5	5	5	5	5	5	5	5	5	5	5	5	5	3.16667	5	5	5	5	5	5
808	1	2	5	5	5	1	5	5	5	5	5	5	5	5	5	5	5	5	5	5	5	5	5	5	5	5	5	5	5	5	3.16667	5	5	5	5	5	5
809	4	2	5	5	5	2	5	5	5	5	5	5	5	5	5	5	5	5	5	5	5	5	5	5	5	5	5	5	5	5	3.83333	5	5	5	5	5	5
810	5	5	5	5	5	5	5	5	5	5	5	5	5	5	5	5	5	5	5	5	5	5	5	5	4	5	5	5	5	5	5	5	5	5	5	4.66667	5
811	5	5	5	5	5	5	5	5	5	5	5	5	5	5	5	5	5	5	5	5	5	5	5	5	5	5	5	5	1	5	5	5	5	5	5	5	3.66667
812	5	5	5	5	5	5	5	5	5	4	2	4	5	5	5	5	5	5	5	5	5	5	5	5	4	5	5	5	2	5	5	4.16667	5	5	5	4.66667	4
813	5	5	5	5	5	5	5	5	5	4	5	5	5	5	5	5	5	5	5	5	5	5	5	5	5	5	5	5	3	5	5	4.83333	5	5	5	5	4.33333
814	5	5	5	5	5	5	5	5	5	4	4	4	5	4	5	5	5	5	5	5	5	5	5	5	4	5	5	5	4	5	5	4.5	5	5	4.66667	4.66667	4.66667
815	5	5	5	5	5	5	5	5	5	4	4	4	5	4	5	5	5	5	5	5	5	5	5	5	4	5	5	5	4	5	5	4.5	5	5	4.66667	4.66667	4.66667
816	5	5	5	5	5	5	5	5	5	4	4	4	4	4	5	5	5	5	5	5	5	5	5	5	4	5	5	5	4	5	5	4.5	5	5	4.33333	4.66667	4.66667
817	5	5	5	5	5	5	5	5	5	4	4	5	4	4	5	5	5	5	5	5	5	5	5	5	4	5	4	5	4	5	5	4.66667	5	5	4.33333	4.33333	4.66667
818	5	5	5	5	5	5	5	5	5	4	4	5	4	4	5	5	5	5	5	5	5	5	5	5	4	5	4	5	4	5	5	4.66667	5	5	4.33333	4.33333	4.66667
819	5	5	5	5	5	5	5	5	5	4	4	5	4	4	5	5	5	5	5	5	5	5	5	5	4	5	4	5	5	5	5	4.66667	5	5	4.33333	4.33333	5
820	5	5	5	5	5	5	5	5	5	4	4	5	4	4	5	5	5	5	5	5	5	5	5	5	5	5	4	5	5	5	5	4.66667	5	5	4.33333	4.66667	5
821	5	5	5	5	5	5	5	5	5	4	4	5	4	4	5	5	5	5	5	5	5	5	5	5	5	5	5	5	5	5	5	4.66667	5	5	4.33333	5	5
822	5	5	5	5	5	5	5	5	5	4	4	5	4	5	5	5	5	5	5	5	5	5	5	5	5	5	5	5	5	5	5	4.66667	5	5	4.66667	5	5
823	5	5	5	5	5	5	5	5	5	4	3	5	4	5	5	5	5	5	5	5	5	5	5	5	5	5	5	5	5	5	5	4.5	5	5	4.66667	5	5
824	5	5	5	5	5	5	5	5	5	4	4	5	5	5	5	5	4	4	5	5	5	5	5	5	5	5	5	5	5	5	5	4.66667	4.6	5	5	5	5
825	5	5	5	5	5	5	5	5	5	4	4	5	5	5	5	5	4	4	5	5	5	5	5	5	5	5	5	5	5	5	5	4.66667	4.6	5	5	5	5
826	5	5	5	5	5	5	5	5	5	5	5	5	5	5	5	5	4	4	5	5	5	5	5	5	5	5	5	5	5	5	5	5	4.6	5	5	5	5
827	5	5	5	5	5	5	5	5	5	5	5	5	5	5	5	5	4	3	5	5	5	5	5	5	5	5	5	5	5	5	5	5	4.4	5	5	5	5
828	5	5	5	5	5	5	5	5	5	5	5	5	5	5	5	5	4	4	5	5	5	5	5	5	5	5	5	5	5	5	5	5	4.6	5	5	5	5
829	5	5	5	5	5	5	5	5	5	5	5	5	5	5	5	5	4	4	5	5	5	5	5	5	5	5	5	5	5	5	5	5	4.6	5	5	5	5
830	5	5	5	5	5	5	5	5	5	5	5	5	5	5	5	5	5	5	5	5	5	5	5	5	5	5	5	5	5	5	5	5	5	5	5	5	5
831	5	5	5	5	5	5	5	5	5	5	5	5	5	5	5	5	4	4	5	5	5	5	5	5	5	5	5	5	5	5	5	5	4.6	5	5	5	5
832	5	5	5	5	5	5	5	5	5	5	5	5	5	5	5	5	4	5	5	5	5	5	5	5	5	5	5	5	5	5	5	5	4.8	5	5	5	5
833	5	5	5	5	5	5	5	5	5	5	5	5	5	5	5	5	3	5	5	5	5	5	5	5	5	5	5	5	5	5	5	5	4.6	5	5	5	5
834	5	5	5	5	5	5	5	5	5	5	5	5	5	5	5	5	4	5	5	5	5	5	5	5	5	5	5	5	5	4	5	5	4.8	5	5	5	4.66667
835	5	5	5	5	5	5	5	5	5	5	5	5	5	5	5	5	4	5	5	5	5	5	5	5	5	5	5	5	5	4	5	5	4.8	5	5	5	4.66667
836	5	5	5	5	5	5	5	5	5	5	5	5	5	5	5	5	4	5	5	5	5	5	5	5	5	5	5	5	5	4	5	5	4.8	5	5	5	4.66667
837	5	5	5	5	5	5	5	4	5	5	5	5	5	5	5	5	3	5	5	5	5	5	5	5	5	5	5	5	5	4	5	4.83333	4.6	5	5	5	4.66667
838	5	5	5	5	5	5	5	4	5	5	5	5	4	5	5	5	5	5	5	5	5	5	5	5	5	5	5	5	5	4	5	4.83333	5	5	4.66667	5	4.66667
839	4	4	5	5	3	4	5	4	5	5	5	5	4	5	5	5	4	5	5	5	5	5	5	5	5	5	4	5	5	4	4.16667	4.83333	4.8	5	4.66667	4.66667	4.66667
840	5	4	5	5	5	4	5	4	5	5	5	5	5	5	5	5	4	5	5	5	5	5	5	5	5	5	4	5	5	3	4.66667	4.83333	4.8	5	5	4.66667	4.33333
841	5	5	5	5	5	5	5	4	5	5	5	5	4	5	5	5	4	5	5	5	5	5	5	5	5	5	2	5	5	4	5	4.83333	4.8	5	4.66667	4	4.66667
842	5	5	5	5	5	5	5	4	5	5	5	5	4	5	5	5	4	5	5	5	2	5	5	5	5	5	4	5	5	4	5	4.83333	4.8	4.25	4.66667	4.66667	4.66667
843	5	5	5	5	5	5	5	4	5	4	4	5	4	5	5	5	3	5	5	5	1	5	5	5	5	5	5	5	5	5	5	4.5	4.6	4	4.66667	5	5
844	5	5	5	5	5	5	5	4	5	4	4	5	4	5	5	5	4	5	5	5	2	5	5	5	5	5	4	5	5	3	5	4.5	4.8	4.25	4.66667	4.66667	4.33333
845	5	5	5	5	5	5	5	4	5	4	4	5	4	5	5	5	5	5	5	5	1	5	5	5	5	5	4	5	5	4	5	4.5	5	4	4.66667	4.66667	4.66667
846	4	3	5	5	4	3	5	5	5	5	5	5	4	5	5	5	5	5	5	5	2	5	5	5	5	5	4	5	5	2	4	5	5	4.25	4.66667	4.66667	4
847	5	4	5	5	5	4	5	5	5	5	5	5	4	5	5	5	5	5	5	5	5	5	5	5	5	5	3	5	5	4	4.66667	5	5	5	4.66667	4.33333	4.66667
848	4	4	5	5	4	4	5	5	5	5	5	5	4	5	5	5	5	5	5	5	5	5	5	5	5	5	4	5	5	3	4.33333	5	5	5	4.66667	4.66667	4.33333
849	4	3	5	5	4	4	5	5	5	5	5	5	4	5	5	5	4	5	5	5	5	5	5	5	5	5	4	5	5	2	4.16667	5	4.8	5	4.66667	4.66667	4
850	5	5	5	5	5	5	5	5	5	5	5	5	5	5	5	5	5	5	5	5	5	5	5	5	5	5	4	5	5	5	5	5	5	5	5	4.66667	5
851	5	5	5	5	5	5	5	5	5	5	5	5	5	5	5	5	4	5	5	5	5	5	5	5	5	5	5	5	5	5	5	5	4.8	5	5	5	5
852	5	5	5	5	5	5	5	5	5	5	5	5	5	5	5	5	4	5	5	5	5	5	5	5	5	5	3	5	5	5	5	5	4.8	5	5	4.33333	5
853	5	5	5	5	5	5	5	5	5	5	5	5	5	5	5	5	5	5	5	5	5	5	5	5	5	5	3	5	5	5	5	5	5	5	5	4.33333	5
854	5	5	5	5	5	5	5	5	5	5	5	5	5	5	5	5	4	5	5	5	5	5	4	5	5	5	4	5	5	5	5	5	4.8	4.75	5	4.66667	5
855	5	5	5	5	5	5	5	5	5	5	5	5	5	5	5	5	5	5	5	5	5	4	5	5	5	5	5	5	5	5	5	5	5	4.75	5	5	5
856	5	5	5	5	5	5	5	5	5	5	5	5	5	5	5	5	4	5	5	5	5	5	5	5	5	5	4	5	5	5	5	5	4.8	5	5	4.66667	5
857	5	5	5	5	5	5	5	5	5	5	5	5	5	5	5	5	4	5	5	5	5	5	5	5	5	5	3	5	5	5	5	5	4.8	5	5	4.33333	5
858	5	5	5	5	5	5	5	5	5	5	5	5	5	5	5	5	4	5	5	5	5	5	5	5	5	5	5	5	5	5	5	5	4.8	5	5	5	5
859	5	5	5	5	5	5	5	5	5	5	5	5	5	5	5	5	5	5	5	3	5	5	5	5	5	5	4	5	5	5	5	5	4.6	5	5	4.66667	5
860	5	5	5	5	5	5	5	5	5	5	5	5	5	5	5	5	4	5	5	4	5	5	5	5	5	5	3	5	5	5	5	5	4.6	5	5	4.33333	5
861	5	5	5	5	5	5	5	5	5	5	5	5	5	5	5	5	4	5	5	4	5	5	5	5	5	5	4	5	5	5	5	5	4.6	5	5	4.66667	5
862	5	5	5	5	5	5	5	5	5	5	5	4	5	5	5	5	5	5	5	4	5	5	5	5	5	5	4	5	5	5	5	4.83333	4.8	5	5	4.66667	5
863	5	5	5	5	5	5	5	5	5	5	5	5	5	5	5	5	5	5	5	5	5	5	5	5	5	5	5	5	5	5	5	5	5	5	5	5	5
864	5	5	5	5	5	5	5	5	5	5	5	3	5	5	4	5	5	5	5	3	5	5	5	5	5	5	3	5	5	5	5	4.66667	4.6	5	4.66667	4.33333	5
865	5	5	5	5	5	4	5	5	5	5	5	3	5	5	3	5	5	5	5	3	2	5	5	5	5	5	4	5	5	5	4.83333	4.66667	4.6	4.25	4.33333	4.66667	5
866	5	5	5	5	5	4	5	5	5	5	5	5	5	5	4	5	5	5	5	4	3	5	5	5	5	5	5	5	5	5	4.83333	5	4.8	4.5	4.66667	5	5
867	5	5	5	5	5	4	5	5	5	5	5	4	5	5	4	5	5	5	5	4	1	5	5	5	5	5	4	5	5	5	4.83333	4.83333	4.8	4	4.66667	4.66667	5
868	5	5	5	5	5	4	5	5	5	5	5	4	5	5	5	5	5	5	5	4	3	5	5	5	5	5	4	5	5	5	4.83333	4.83333	4.8	4.5	5	4.66667	5
869	5	5	3	5	5	4	5	5	5	5	5	4	5	5	4	5	5	5	5	5	1	5	5	5	5	5	4	5	5	5	4.5	4.83333	5	4	4.66667	4.66667	5
870	5	5	5	5	5	4	5	5	5	5	5	5	5	5	5	5	5	5	5	4	4	5	5	5	5	5	5	5	5	5	4.83333	5	4.8	4.75	5	5	5
871	5	5	5	5	5	4	5	5	5	5	5	4	5	5	5	5	5	5	5	4	1	5	5	5	5	5	3	5	5	5	4.83333	4.83333	4.8	4	5	4.33333	5
872	5	5	5	5	5	4	5	5	5	5	5	4	5	5	5	5	5	5	5	5	1	5	5	5	5	5	4	5	5	5	4.83333	4.83333	5	4	5	4.66667	5
873	5	5	5	5	3	4	5	5	5	5	5	5	5	5	5	5	5	5	5	4	1	5	5	5	5	5	4	5	5	5	4.5	5	4.8	4	5	4.66667	5
874	5	5	5	5	5	4	5	5	5	5	5	4	5	5	5	5	5	5	5	4	2	5	5	5	5	5	4	5	5	5	4.83333	4.83333	4.8	4.25	5	4.66667	5
875	5	5	5	5	5	4	5	5	5	5	5	5	5	5	5	5	5	5	5	4	2	5	5	5	5	5	5	5	5	4	4.83333	5	4.8	4.25	5	5	4.66667
876	5	5	5	5	5	5	5	5	5	5	5	5	5	5	5	5	5	5	5	5	2	5	5	5	5	5	5	5	5	4	5	5	5	4.25	5	5	4.66667
877	5	5	5	5	5	5	5	5	5	5	5	5	5	5	5	5	5	5	5	5	3	5	5	5	5	5	5	5	5	3	5	5	5	4.5	5	5	4.33333
878	5	5	5	5	5	5	5	5	5	5	5	5	5	5	5	5	5	5	5	5	2	5	5	5	5	5	5	5	5	3	5	5	5	4.25	5	5	4.33333
879	5	5	5	5	5	5	5	5	5	5	5	5	5	5	5	5	4	5	5	5	1	5	5	5	5	5	5	5	5	4	5	5	4.8	4	5	5	4.66667
880	5	5	5	5	5	5	5	5	5	5	5	5	5	5	5	5	5	5	5	5	5	5	5	5	5	5	5	5	5	4	5	5	5	5	5	5	4.66667
881	5	5	5	5	5	5	5	5	5	5	5	5	5	5	5	5	4	5	5	5	5	5	5	5	5	5	5	5	5	3	5	5	4.8	5	5	5	4.33333
882	5	5	5	5	5	5	5	5	5	5	5	5	5	5	5	5	4	5	5	5	5	5	1	1	5	5	5	5	5	3	5	5	4.8	3	5	5	4.33333
883	5	5	5	5	5	5	5	5	5	5	5	5	5	4	5	5	2	5	5	5	5	5	2	4	5	5	5	5	5	4	5	5	4.4	4	4.66667	5	4.66667
884	5	5	3	5	5	5	5	5	5	5	5	5	5	5	3	5	3	5	5	5	5	5	4	3	5	5	5	3	5	4	4.66667	5	4.6	4.25	4.33333	5	4
885	5	5	5	5	5	5	4	4	4	4	4	5	5	5	4	5	4	5	5	5	5	5	4	4	5	5	5	2	5	4	5	4.16667	4.8	4.5	4.66667	5	3.66667
886	5	5	5	5	5	5	5	5	5	5	4	5	5	5	5	5	4	5	5	5	5	5	4	4	5	5	5	5	5	5	5	4.83333	4.8	4.5	5	5	5
887	5	5	5	5	5	5	4	4	4	4	4	5	5	5	4	5	4	5	5	4	5	5	2	2	5	5	5	4	5	2	5	4.16667	4.6	3.5	4.66667	5	3.66667
888	5	5	5	5	5	5	2	4	4	3	4	5	5	5	3	5	4	5	5	4	5	5	3	3	5	5	5	4	5	4	5	3.66667	4.6	4	4.33333	5	4.33333
889	5	5	5	5	5	5	5	4	4	4	4	5	5	5	5	5	5	5	5	5	5	5	5	4	5	5	5	3	5	4	5	4.33333	5	4.75	5	5	4
890	5	5	5	5	5	5	5	5	5	4	4	5	5	5	4	5	2	5	5	4	5	5	4	1	5	5	5	4	5	4	5	4.66667	4.2	3.75	4.66667	5	4.33333
891	5	5	5	5	5	5	5	5	5	5	4	5	5	5	5	5	4	5	5	4	5	5	1	1	5	5	5	3	5	4	5	4.83333	4.6	3	5	5	4
892	5	5	5	5	5	5	5	5	5	3	3	5	5	5	5	5	5	5	5	5	5	5	2	3	5	5	5	3	5	3	5	4.33333	5	3.75	5	5	3.66667
893	5	5	5	5	5	5	5	5	5	5	4	5	5	5	4	5	4	5	5	4	5	5	4	4	5	5	5	1	5	4	5	4.83333	4.6	4.5	4.66667	5	3.33333
894	5	5	5	5	5	4	5	5	5	4	5	5	5	5	5	5	5	5	5	5	5	5	5	4	5	5	5	4	5	4	4.83333	4.83333	5	4.75	5	5	4.33333
895	5	4	4	5	4	3	5	5	5	3	5	5	5	5	3	5	3	5	5	3	5	5	2	2	5	5	5	4	5	3	4.16667	4.66667	4.2	3.5	4.33333	5	4
896	5	5	4	5	5	4	5	5	5	4	5	5	5	5	5	5	3	5	5	4	4	5	3	1	5	5	5	5	5	5	4.66667	4.83333	4.4	3.25	5	5	5
897	5	2	4	5	5	5	5	5	5	5	5	5	5	5	5	5	5	5	5	5	5	4	1	1	5	5	5	3	5	4	4.33333	5	5	2.75	5	5	4
898	5	2	2	5	4	4	5	5	5	4	4	5	5	5	5	5	5	5	5	4	5	5	2	1	5	5	5	3	5	2	3.66667	4.66667	4.8	3.25	5	5	3.33333
899	5	5	5	5	5	5	5	5	5	4	4	5	5	5	5	5	2	5	5	2	5	5	1	1	5	5	5	4	5	2	5	4.66667	3.8	3	5	5	3.66667
900	5	5	5	5	5	5	5	5	5	5	4	4	5	5	5	5	2	5	5	3	5	5	2	2	5	5	5	2	5	2	5	4.66667	4	3.5	5	5	3
901	5	5	5	5	5	5	5	5	5	2	1	4	5	5	5	5	4	5	5	4	5	5	4	4	5	5	5	5	5	4	5	3.66667	4.6	4.5	5	5	4.66667
902	5	5	5	5	5	5	5	5	5	4	5	4	5	5	5	5	5	5	5	4	5	5	2	2	5	5	5	2	5	2	5	4.66667	4.8	3.5	5	5	3
903	5	5	5	5	5	5	5	5	5	4	3	5	5	5	5	5	5	5	5	3	5	5	4	3	5	5	5	4	5	4	5	4.5	4.6	4.25	5	5	4.33333
904	5	5	5	5	5	5	4	5	5	2	4	4	5	5	5	5	2	5	5	1	5	5	1	1	5	5	5	4	5	4	5	4	3.6	3	5	5	4.33333
905	5	5	5	5	5	5	1	5	5	1	1	1	5	5	5	5	5	5	5	5	5	5	5	4	5	5	5	3	5	2	5	2.33333	5	4.75	5	5	3.33333
906	5	5	5	5	5	5	3	5	5	4	5	4	5	5	5	5	4	5	5	4	5	5	2	1	5	5	5	3	5	4	5	4.33333	4.6	3.25	5	5	4
907	5	5	5	5	5	5	5	5	5	5	5	5	5	5	5	5	1	5	5	5	5	5	1	1	5	5	5	1	5	3	5	5	4.2	3	5	5	3
908	5	5	5	5	5	5	5	5	5	5	5	5	5	5	5	5	4	5	5	3	5	5	3	3	5	5	5	1	5	3	5	5	4.4	4	5	5	3
909	5	5	5	5	5	5	5	5	5	5	5	5	5	5	5	5	4	3	5	3	5	5	1	2	5	5	5	4	5	4	5	5	4	3.25	5	5	4.33333
910	5	5	5	5	5	5	5	5	5	5	5	5	4	5	5	2	2	2	5	2	5	5	2	2	5	5	5	4	5	4	5	5	2.6	3.5	4.66667	5	4.33333
911	5	5	5	5	5	5	5	5	5	5	5	5	5	5	5	5	5	4	4	5	5	5	1	4	5	5	5	5	5	3	5	5	4.6	3.75	5	5	4.33333
912	5	5	5	5	5	5	5	5	5	5	5	5	2	2	1	4	4	4	4	4	5	5	4	2	5	5	5	4	5	4	5	5	4	4	1.66667	5	4.33333
913	5	5	5	5	5	5	5	5	5	5	5	5	4	2	2	2	2	2	4	2	5	5	2	2	5	5	5	1	5	2	5	5	2.4	3.5	2.66667	5	2.66667
914	5	5	5	5	5	5	5	5	5	5	5	5	5	5	5	2	2	2	4	3	5	5	5	5	5	5	5	5	5	5	5	5	2.6	5	5	5	5
915	5	5	5	5	5	5	5	5	5	5	5	5	4	5	3	4	5	4	4	5	5	5	3	5	5	5	5	4	5	5	5	5	4.4	4.5	4	5	4.66667
916	5	4	3	5	3	3	5	5	5	5	5	5	3	2	3	2	3	3	5	2	5	5	3	4	5	5	5	3	5	5	3.83333	5	3	4.25	2.66667	5	4.33333
917	5	5	3	5	5	4	5	5	5	5	5	5	5	5	5	4	5	4	5	4	5	5	5	5	5	5	5	2	5	5	4.5	5	4.4	5	5	5	4
918	5	4	3	5	5	5	5	5	5	5	5	5	2	2	3	3	4	4	5	3	5	5	4	1	5	5	5	1	5	5	4.5	5	3.8	3.75	2.33333	5	3.66667
919	5	4	4	5	4	4	5	5	5	5	5	5	3	2	2	4	4	4	5	4	5	5	4	4	5	5	5	2	5	5	4.33333	5	4.2	4.5	2.33333	5	4
920	5	3	2	5	5	4	5	5	5	5	5	5	4	5	3	4	5	3	5	3	5	5	2	3	5	5	5	3	5	5	4	5	4	3.75	4	5	4.33333
921	5	5	5	5	5	5	5	5	5	5	5	5	4	4	4	4	4	4	5	4	5	5	5	5	5	5	5	4	5	5	5	5	4.2	5	4	5	4.66667
922	5	5	5	5	5	5	5	5	5	5	5	5	4	4	4	4	4	4	5	5	5	5	5	5	5	5	5	3	5	5	5	5	4.4	5	4	5	4.33333
923	5	5	5	5	5	5	5	5	5	5	5	5	4	4	4	3	4	4	5	5	4	4	5	5	5	5	5	4	5	5	5	5	4.2	4.5	4	5	4.66667
924	5	5	5	5	5	5	5	5	5	5	5	5	4	4	4	4	4	4	5	5	5	5	5	5	5	5	5	3	5	5	5	5	4.4	5	4	5	4.33333
925	5	5	5	5	5	5	5	5	5	5	5	5	4	4	4	4	4	3	5	5	5	4	4	5	5	5	5	4	5	5	5	5	4.2	4.5	4	5	4.66667
926	5	5	5	5	5	5	5	5	5	5	5	5	5	5	5	5	5	5	5	4	5	5	5	5	5	5	5	5	5	5	5	5	4.8	5	5	5	5
927	5	5	5	5	5	5	5	5	5	5	5	5	4	4	4	4	4	4	5	5	5	5	5	5	5	5	5	5	5	5	5	5	4.4	5	4	5	5
928	5	5	5	5	5	5	5	5	5	5	5	5	4	4	4	4	4	4	5	5	5	5	5	5	5	5	5	5	5	5	5	5	4.4	5	4	5	5
929	5	5	5	3	5	3	5	5	5	5	5	5	5	4	5	3	5	5	5	5	5	5	5	5	5	5	5	5	5	5	4.33333	5	4.6	5	4.66667	5	5
930	2	5	5	5	5	5	5	5	2	5	5	5	4	4	5	4	5	5	5	5	5	4	4	5	5	3	4	5	5	5	4.5	4.5	4.8	4.5	4.33333	4	5
931	5	5	4	5	3	5	5	3	5	5	5	5	3	5	5	4	5	5	5	5	4	5	5	5	5	5	4	5	5	5	4.5	4.66667	4.8	4.75	4.33333	4.66667	5
932	5	3	5	5	3	5	4	5	5	5	5	5	5	5	4	4	5	5	5	5	5	5	5	5	5	4	5	5	5	5	4.33333	4.83333	4.8	5	4.66667	4.66667	5
933	3	5	5	5	5	5	5	5	5	5	5	5	5	5	5	5	5	3	5	5	5	4	5	5	5	5	5	5	5	5	4.66667	5	4.6	4.75	5	5	5
934	5	2	2	5	3	2	5	5	5	5	5	4	5	5	4	3	5	5	5	5	5	5	5	5	5	5	5	5	5	5	3.16667	4.83333	4.6	5	4.66667	5	5
935	5	5	5	5	3	5	5	5	5	5	5	4	5	5	5	5	5	5	5	5	5	5	5	5	5	5	5	5	5	5	4.66667	4.83333	5	5	5	5	5
936	5	5	5	5	5	5	5	5	5	5	5	4	3	5	5	5	5	5	5	5	5	5	5	5	5	5	5	5	4	5	5	4.83333	5	5	4.33333	5	4.66667
937	5	5	5	5	3	5	5	5	5	5	5	4	5	5	5	5	5	5	5	5	4	5	5	5	5	5	5	5	4	5	4.66667	4.83333	5	4.75	5	5	4.66667
938	5	5	5	4	3	5	5	5	5	5	5	4	5	4	5	5	4	5	5	5	5	5	5	5	5	5	5	5	4	5	4.5	4.83333	4.8	5	4.66667	5	4.66667
939	5	5	5	5	4	5	4	5	5	5	5	5	5	5	5	5	5	5	5	5	5	5	5	5	5	5	5	5	5	5	4.83333	4.83333	5	5	5	5	5
940	2	5	5	5	5	5	5	5	5	4	4	4	5	5	4	5	5	5	5	5	5	5	5	5	5	5	5	5	4	4	4.5	4.5	5	5	4.66667	5	4.33333
941	5	5	5	5	5	5	5	5	5	5	5	4	5	4	5	5	5	5	5	5	5	5	5	5	5	5	5	5	5	4	5	4.83333	5	5	4.66667	5	4.66667
942	5	4	4	5	4	5	5	5	5	5	5	4	5	5	5	5	5	5	5	5	5	5	5	5	5	5	5	5	4	5	4.5	4.83333	5	5	5	5	4.66667
943	4	3	3	5	3	4	5	5	4	4	4	4	4	5	3	5	5	5	5	5	5	5	5	5	5	5	5	5	2	4	3.66667	4.33333	5	5	4	5	3.66667
944	5	3	4	5	4	4	4	3	4	4	4	4	4	5	5	5	2	2	5	5	1	5	5	5	5	5	4	5	3	5	4.16667	3.83333	3.8	4	4.66667	4.66667	4.33333
945	5	5	5	5	5	5	4	5	5	4	5	4	4	5	5	5	4	4	4	4	4	4	5	5	5	5	5	5	4	4	5	4.5	4.2	4.5	4.66667	5	4.33333
946	5	5	5	5	5	5	4	5	5	4	5	4	4	5	5	4	4	4	4	4	4	4	5	5	5	5	5	5	4	4	5	4.5	4	4.5	4.66667	5	4.33333
947	5	5	5	5	5	5	4	5	5	4	5	4	4	5	5	4	4	4	4	4	5	4	5	5	5	5	5	5	4	4	5	4.5	4	4.75	4.66667	5	4.33333
948	5	5	5	5	5	5	4	5	5	4	5	4	4	5	5	5	4	5	4	4	5	4	5	5	5	5	5	5	5	5	5	4.5	4.4	4.75	4.66667	5	5
949	5	5	5	5	5	5	4	5	5	4	5	4	5	5	5	5	5	5	4	4	5	5	5	5	5	5	5	5	5	5	5	4.5	4.6	5	5	5	5
950	5	5	5	5	5	5	4	5	5	4	5	4	5	5	5	5	5	5	4	4	5	5	5	5	5	5	5	5	5	5	5	4.5	4.6	5	5	5	5
951	5	5	5	5	5	5	4	5	5	4	5	4	5	5	5	5	5	5	4	4	5	5	5	5	5	5	5	5	5	5	5	4.5	4.6	5	5	5	5
952	5	5	5	5	5	5	4	5	5	4	5	4	5	5	5	5	5	5	5	5	5	5	5	5	5	5	5	5	3	5	5	4.5	5	5	5	5	4.33333
953	5	5	5	5	5	5	4	5	5	4	5	4	5	5	5	5	5	5	5	5	5	5	5	5	5	5	5	5	5	5	5	4.5	5	5	5	5	5
954	5	5	5	3	5	5	4	5	5	4	5	4	5	5	5	5	5	5	5	5	5	5	5	5	5	5	5	5	5	5	4.66667	4.5	5	5	5	5	5
955	5	5	5	5	5	5	4	5	5	4	5	5	5	5	5	5	5	5	5	5	5	5	5	5	5	5	5	5	5	5	5	4.66667	5	5	5	5	5
956	4	3	3	5	4	4	5	5	5	5	5	4	5	5	5	5	5	5	5	5	5	5	5	5	5	5	5	5	5	5	3.83333	4.83333	5	5	5	5	5
957	5	5	5	5	5	5	5	5	5	5	5	4	5	5	5	5	5	5	5	5	5	5	5	5	5	5	5	5	5	5	5	4.83333	5	5	5	5	5
958	5	5	5	5	5	5	5	5	5	5	5	5	5	5	5	5	5	5	5	5	5	5	5	5	5	5	5	5	5	5	5	5	5	5	5	5	5
959	5	5	5	5	5	5	5	5	5	5	5	4	5	5	5	5	5	5	5	5	5	5	5	5	5	5	5	5	5	5	5	4.83333	5	5	5	5	5
960	5	5	5	5	5	5	5	5	5	5	5	4	5	5	5	5	5	5	5	5	5	5	5	5	5	5	5	5	5	5	5	4.83333	5	5	5	5	5
961	5	5	5	5	5	5	5	5	5	5	5	4	5	5	5	5	5	5	5	5	5	5	5	5	5	5	5	5	5	5	5	4.83333	5	5	5	5	5
962	3	3	4	2	5	4	5	5	5	5	5	4	5	5	5	4	5	5	5	5	5	5	5	5	5	5	5	5	5	5	3.5	4.83333	4.8	5	5	5	5
963	5	5	5	5	5	5	5	5	5	5	5	4	5	5	5	4	5	5	5	5	5	5	5	5	5	5	4	5	5	5	5	4.83333	4.8	5	5	4.66667	5
964	5	5	5	5	5	5	5	5	5	5	5	5	5	5	5	4	5	5	5	5	5	5	5	5	5	5	4	5	5	5	5	5	4.8	5	5	4.66667	5
965	4	3	4	5	5	4	5	5	5	5	5	4	4	5	5	4	5	5	5	5	5	5	5	5	5	5	4	5	5	5	4.16667	4.83333	4.8	5	4.66667	4.66667	5
966	5	5	5	5	5	4	5	5	5	5	5	4	4	5	5	4	5	5	5	5	5	5	5	5	5	5	5	5	5	5	4.83333	4.83333	4.8	5	4.66667	5	5
967	4	4	4	5	5	4	5	5	5	5	5	5	4	5	5	4	5	5	5	5	5	5	5	5	5	5	4	5	5	5	4.33333	5	4.8	5	4.66667	4.66667	5
968	5	5	5	5	5	5	5	5	5	5	5	5	5	5	5	4	5	5	5	5	5	5	5	5	5	5	4	5	5	5	5	5	4.8	5	5	4.66667	5
969	4	3	3	5	5	5	5	5	5	5	5	5	5	5	5	5	5	5	5	5	5	5	5	5	5	5	5	5	5	5	4.16667	5	5	5	5	5	5
970	5	5	5	5	5	5	5	5	5	5	5	5	5	5	5	5	5	5	5	5	5	5	5	5	5	5	5	5	5	5	5	5	5	5	5	5	5
971	5	5	4	5	5	4	5	5	5	5	5	5	5	5	5	5	5	5	5	5	5	5	5	5	5	5	5	5	5	5	4.66667	5	5	5	5	5	5
972	5	5	5	5	4	4	4	3	4	4	5	5	4	4	5	5	5	5	5	4	5	5	5	5	5	5	5	5	5	5	4.66667	4.16667	4.8	5	4.33333	5	5
973	5	5	5	5	4	4	4	4	4	4	5	5	5	5	5	5	5	5	5	3	5	5	5	5	5	5	5	5	5	5	4.66667	4.33333	4.6	5	5	5	5
974	5	5	5	5	4	4	4	4	4	3	5	5	5	4	4	5	5	5	5	4	5	5	5	5	5	5	5	5	5	5	4.66667	4.16667	4.8	5	4.33333	5	5
975	4	3	3	5	5	5	5	5	5	5	5	4	5	5	5	5	5	5	5	5	5	5	5	5	5	5	5	5	4	5	4.16667	4.83333	5	5	5	5	4.66667
976	5	4	4	5	4	4	4	4	4	4	5	5	5	5	5	5	5	5	5	5	5	5	5	5	5	5	5	5	4	5	4.33333	4.33333	5	5	5	5	4.66667
977	2	3	3	5	4	4	4	4	4	4	5	5	5	5	5	5	5	5	5	5	5	5	5	5	5	5	5	5	3	5	3.5	4.33333	5	5	5	5	4.33333
978	5	5	5	5	5	4	5	3	5	5	5	5	5	5	5	5	5	5	5	5	5	5	5	5	5	5	5	5	4	5	4.83333	4.66667	5	5	5	5	4.66667
979	4	5	5	5	4	4	5	4	5	5	5	5	5	4	4	5	5	3	4	5	5	5	5	5	5	5	5	5	5	5	4.5	4.83333	4.4	5	4.33333	5	5
980	4	3	5	5	3	5	5	4	5	5	5	5	4	5	5	5	5	5	4	5	5	5	5	5	5	5	5	5	3	5	4.16667	4.83333	4.8	5	4.66667	5	4.33333
981	3	3	4	5	5	5	4	4	5	5	5	5	5	5	5	5	5	4	5	5	5	5	5	5	5	5	5	5	3	5	4.16667	4.66667	4.8	5	5	5	4.33333
982	4	3	4	5	5	5	5	5	5	3	5	5	5	4	5	5	5	5	5	5	5	5	5	5	5	5	5	5	1	5	4.33333	4.66667	5	5	4.66667	5	3.66667
983	4	4	4	4	5	5	4	3	5	5	5	5	5	5	5	5	5	5	5	5	5	5	5	5	5	5	5	5	4	5	4.33333	4.5	5	5	5	5	4.66667
984	5	5	5	4	5	5	5	5	5	5	5	5	5	5	5	5	5	5	5	5	5	5	5	5	5	5	5	5	5	5	4.83333	5	5	5	5	5	5
985	5	4	4	4	3	5	5	5	5	5	5	5	5	5	5	5	5	5	5	5	4	5	5	5	5	5	5	5	3	5	4.16667	5	5	4.75	5	5	4.33333
986	4	3	3	4	5	5	5	5	5	5	5	5	4	5	5	5	5	5	5	5	4	5	5	5	5	5	5	5	4	5	4	5	5	4.75	4.66667	5	4.66667
987	5	5	5	5	5	5	5	5	5	5	5	5	5	4	4	5	4	5	5	5	5	5	5	5	5	5	5	5	4	5	5	5	4.8	5	4.33333	5	4.66667
988	5	5	5	5	5	5	5	5	5	5	5	4	5	5	4	5	3	5	5	5	5	5	5	5	5	5	5	5	4	5	5	4.83333	4.6	5	4.66667	5	4.66667
989	5	5	5	5	5	5	5	5	5	5	5	5	5	5	5	5	5	5	5	5	5	5	5	5	5	5	5	5	3	5	5	5	5	5	5	5	4.33333
990	5	5	5	5	5	5	5	5	5	5	5	4	5	5	4	5	5	5	5	5	5	5	5	5	5	5	5	5	4	5	5	4.83333	5	5	4.66667	5	4.66667
991	5	5	5	5	5	5	5	5	5	5	5	5	5	5	5	5	5	5	5	5	5	5	5	5	5	5	5	5	4	5	5	5	5	5	5	5	4.66667
992	5	5	5	5	5	5	5	5	5	5	5	4	5	5	5	5	2	5	5	5	5	5	5	5	5	5	5	5	2	5	5	4.83333	4.4	5	5	5	4
993	5	5	5	5	5	5	5	5	5	5	5	4	5	5	5	5	5	5	5	5	5	5	5	5	5	5	5	5	5	5	5	4.83333	5	5	5	5	5
994	5	5	5	5	5	5	5	5	5	5	5	4	5	5	5	5	5	5	5	5	5	5	5	5	5	5	5	5	5	5	5	4.83333	5	5	5	5	5
995	5	5	5	5	5	5	5	5	5	5	5	5	5	5	5	5	3	5	5	5	5	5	5	5	5	5	5	5	5	5	5	5	4.6	5	5	5	5
996	5	5	5	5	5	5	5	5	5	5	5	5	5	5	5	5	4	5	5	5	5	5	5	5	5	5	5	5	5	5	5	5	4.8	5	5	5	5
997	5	5	5	5	5	5	5	5	5	5	5	4	5	5	5	5	5	4	5	5	5	5	5	5	5	5	5	5	5	5	5	4.83333	4.8	5	5	5	5
998	5	5	5	5	5	5	5	5	5	5	5	4	5	5	5	5	4	4	5	5	5	5	5	5	5	5	5	5	5	5	5	4.83333	4.6	5	5	5	5
999	5	5	5	5	5	5	5	5	5	5	5	5	5	5	5	5	5	4	5	5	5	5	5	5	5	5	5	5	5	5	5	5	4.8	5	5	5	5
1000	5	5	5	5	5	5	3	4	5	5	5	2	5	5	5	5	4	3	5	5	5	5	5	5	5	5	5	5	5	5	5	4	4.4	5	5	5	5
1001	5	5	5	5	5	5	5	4	5	5	5	4	5	5	5	5	4	4	5	5	5	5	5	5	5	5	5	5	5	5	5	4.66667	4.6	5	5	5	5
1002	5	5	5	5	5	5	5	5	5	5	5	5	5	5	5	5	5	5	5	5	5	5	5	5	5	5	5	5	5	5	5	5	5	5	5	5	5
1003	4	4	3	5	5	4	4	4	5	5	5	4	5	5	5	5	4	2	5	5	5	5	5	5	5	5	5	5	5	5	4.16667	4.5	4.2	5	5	5	5
1004	5	5	5	5	5	5	5	4	5	5	5	5	5	5	5	5	4	4	5	5	5	5	5	5	5	5	5	5	5	5	5	4.83333	4.6	5	5	5	5
1005	4	4	4	5	5	5	4	5	5	5	5	5	5	5	5	5	5	2	5	5	5	5	5	5	5	5	5	5	5	5	4.5	4.83333	4.4	5	5	5	5
1006	5	5	5	5	5	5	5	5	5	5	5	5	5	5	5	5	4	4	5	5	5	5	5	5	5	5	5	5	5	5	5	5	4.6	5	5	5	5
1007	5	5	5	5	5	5	5	5	5	5	5	5	5	5	5	5	5	4	5	5	5	5	5	5	5	5	5	5	5	5	5	5	4.8	5	5	5	5
1008	5	5	4	5	5	5	5	5	5	5	5	5	5	5	5	5	5	5	5	5	5	5	5	5	5	5	5	5	5	5	4.83333	5	5	5	5	5	5
1009	5	5	5	5	5	5	5	4	4	4	5	5	5	5	5	5	4	4	5	5	5	5	5	5	5	5	5	5	5	5	5	4.5	4.6	5	5	5	5
1010	5	5	5	5	5	5	2	2	4	4	5	5	5	5	4	5	4	4	5	5	5	5	5	5	5	5	5	5	5	5	5	3.66667	4.6	5	4.66667	5	5
1011	5	5	5	5	5	5	5	5	5	5	5	5	5	5	1	5	4	4	5	5	5	5	5	5	2	5	5	5	5	5	5	5	4.6	5	3.66667	4	5
1012	5	5	5	5	5	5	5	5	5	5	5	5	5	5	5	5	2	2	5	5	5	5	5	5	4	5	5	5	5	5	5	5	3.8	5	5	4.66667	5
1013	5	5	5	5	5	5	5	5	5	5	5	5	5	5	5	5	4	5	5	5	5	5	5	5	3	5	5	5	5	5	5	5	4.8	5	5	4.33333	5
1014	5	5	5	5	5	5	5	5	5	5	5	5	5	5	5	5	5	5	5	5	5	5	5	5	4	5	5	5	5	5	5	5	5	5	5	4.66667	5
1015	5	5	5	5	5	5	5	5	5	5	5	5	5	5	5	5	5	5	5	5	3	5	5	5	1	5	5	5	5	5	5	5	5	4.5	5	3.66667	5
1016	5	5	5	5	5	5	5	5	5	5	5	5	5	5	5	5	5	5	5	5	3	5	5	5	3	5	5	5	5	5	5	5	5	4.5	5	4.33333	5
1017	5	5	5	5	5	5	5	5	5	5	5	5	5	5	5	5	5	5	5	5	5	5	5	5	5	5	5	5	5	5	5	5	5	5	5	5	5
1018	5	5	5	5	5	5	5	5	5	5	5	5	5	5	5	5	5	5	5	5	4	5	5	5	2	5	5	5	5	5	5	5	5	4.75	5	4	5
1019	5	5	5	5	5	5	5	5	5	5	5	5	5	5	5	5	5	5	5	5	2	5	5	5	4	5	5	5	5	5	5	5	5	4.25	5	4.66667	5
1020	5	5	5	5	5	5	5	5	5	5	5	5	5	5	5	5	5	5	5	5	5	5	5	5	4	5	5	5	2	5	5	5	5	5	5	4.66667	4
1021	5	5	5	5	5	5	5	5	5	5	5	5	5	5	5	5	5	5	5	5	5	5	5	5	4	5	5	5	4	5	5	5	5	5	5	4.66667	4.66667
1022	5	5	5	5	5	5	5	5	5	5	5	5	5	5	5	5	5	5	5	5	5	5	5	5	5	5	5	5	4	5	5	5	5	5	5	5	4.66667
1023	5	5	5	5	5	5	5	5	5	5	5	5	5	5	5	5	5	5	5	5	5	5	5	5	4	5	5	5	4	5	5	5	5	5	5	4.66667	4.66667
1024	5	5	5	5	5	5	5	5	5	5	5	5	5	5	5	5	5	5	5	5	5	5	5	5	5	5	5	5	2	5	5	5	5	5	5	5	4
1025	5	5	5	5	5	5	5	5	5	5	5	5	5	5	5	5	5	5	5	5	5	5	5	5	5	5	5	5	3	5	5	5	5	5	5	5	4.33333
1026	5	5	5	5	5	5	5	5	5	5	5	5	5	5	5	5	5	5	5	5	5	5	5	5	5	5	5	5	2	5	5	5	5	5	5	5	4
1027	5	5	5	5	5	5	3	5	5	4	5	5	5	5	5	5	5	5	5	5	5	5	5	5	5	5	5	5	5	5	5	4.5	5	5	5	5	5
1028	5	5	5	5	5	5	5	5	5	5	5	5	5	4	4	5	5	5	5	5	5	5	5	5	5	5	5	5	5	5	5	5	5	5	4.33333	5	5
1029	5	5	5	5	5	5	4	5	5	3	5	5	5	5	4	5	5	5	5	5	5	5	5	5	5	5	5	5	5	5	5	4.5	5	5	4.66667	5	5
1030	5	5	5	5	5	5	5	5	5	4	5	5	5	4	4	5	5	5	5	5	5	5	5	5	5	5	5	5	5	5	5	4.83333	5	5	4.33333	5	5
1031	5	4	5	5	5	4	4	5	5	4	5	5	5	5	4	5	5	5	5	5	5	5	5	5	5	5	5	5	5	5	4.66667	4.66667	5	5	4.66667	5	5
1032	4	4	3	5	5	4	4	5	5	4	5	5	5	5	4	5	5	5	5	5	5	5	5	5	5	5	5	5	5	5	4.16667	4.66667	5	5	4.66667	5	5
1033	1	2	5	5	5	3	2	5	5	2	5	5	5	5	5	5	5	5	5	5	5	5	5	5	5	5	5	5	5	5	3.5	4	5	5	5	5	5
1034	1	2	5	5	5	1	5	5	5	5	5	5	5	5	5	5	5	5	5	5	5	5	5	5	5	5	5	5	5	5	3.16667	5	5	5	5	5	5
1035	5	5	5	5	5	5	5	5	5	5	5	5	5	5	5	5	5	5	5	5	5	5	5	5	5	5	5	5	5	5	5	5	5	5	5	5	5
1036	4	5	5	5	5	4	5	5	5	5	5	5	5	5	5	5	5	5	5	5	5	5	5	5	5	5	5	5	5	5	4.66667	5	5	5	5	5	5
1037	4	4	5	5	5	5	5	5	5	5	5	5	5	5	5	5	5	5	5	5	5	5	5	5	5	5	5	5	5	5	4.66667	5	5	5	5	5	5
1038	1	2	5	5	5	4	5	5	5	5	5	5	5	5	5	5	5	5	5	5	5	5	5	5	5	5	5	5	5	5	3.66667	5	5	5	5	5	5
1039	4	4	5	5	5	3	5	5	5	5	5	5	5	5	5	5	5	5	5	5	5	5	5	5	5	5	5	5	5	5	4.33333	5	5	5	5	5	5
1040	1	2	5	5	5	2	5	5	5	5	5	5	5	5	5	5	5	5	5	5	5	5	5	5	5	5	5	5	5	5	3.33333	5	5	5	5	5	5
1041	1	1	5	5	5	1	5	5	5	5	5	5	5	5	5	5	5	5	5	5	5	5	5	5	5	5	5	5	5	5	3	5	5	5	5	5	5
1042	4	4	5	5	5	5	5	5	5	5	5	5	5	5	5	5	5	5	5	5	5	5	5	5	5	5	5	5	5	5	4.66667	5	5	5	5	5	5
1043	1	2	5	5	5	1	5	5	5	5	5	5	5	5	5	5	5	5	5	5	5	5	5	5	5	5	5	5	5	5	3.16667	5	5	5	5	5	5
1044	1	2	5	5	5	1	5	5	5	5	5	5	5	5	5	5	5	5	5	5	5	5	5	5	5	5	5	5	5	5	3.16667	5	5	5	5	5	5
1045	4	2	5	5	5	2	5	5	5	5	5	5	5	5	5	5	5	5	5	5	5	5	5	5	5	5	5	5	5	5	3.83333	5	5	5	5	5	5
1046	5	5	5	5	5	5	5	5	5	5	5	5	5	5	5	5	5	5	5	5	5	5	5	5	4	5	5	5	5	5	5	5	5	5	5	4.66667	5
1047	5	5	5	5	5	5	5	5	5	5	5	5	5	5	5	5	5	5	5	5	5	5	5	5	5	5	5	5	1	5	5	5	5	5	5	5	3.66667
1048	5	5	5	5	5	5	5	5	5	4	2	4	5	5	5	5	5	5	5	5	5	5	5	5	4	5	5	5	2	5	5	4.16667	5	5	5	4.66667	4
1049	5	5	5	5	5	5	5	5	5	4	5	5	5	5	5	5	5	5	5	5	5	5	5	5	5	5	5	5	3	5	5	4.83333	5	5	5	5	4.33333
1050	5	5	5	5	5	5	5	5	5	4	4	4	5	4	5	5	5	5	5	5	5	5	5	5	4	5	5	5	4	5	5	4.5	5	5	4.66667	4.66667	4.66667
1051	5	5	5	5	5	5	5	5	5	4	4	4	5	4	5	5	5	5	5	5	5	5	5	5	4	5	5	5	4	5	5	4.5	5	5	4.66667	4.66667	4.66667
1052	5	5	5	5	5	5	5	5	5	4	4	4	4	4	5	5	5	5	5	5	5	5	5	5	4	5	5	5	4	5	5	4.5	5	5	4.33333	4.66667	4.66667
1053	5	5	5	5	5	5	5	5	5	4	4	5	4	4	5	5	5	5	5	5	5	5	5	5	4	5	4	5	4	5	5	4.66667	5	5	4.33333	4.33333	4.66667
1054	5	5	5	5	5	5	5	5	5	4	4	5	4	4	5	5	5	5	5	5	5	5	5	5	4	5	4	5	4	5	5	4.66667	5	5	4.33333	4.33333	4.66667
1055	5	5	5	5	5	5	5	5	5	4	4	5	4	4	5	5	5	5	5	5	5	5	5	5	4	5	4	5	5	5	5	4.66667	5	5	4.33333	4.33333	5
1056	5	5	5	5	5	5	5	5	5	4	4	5	4	4	5	5	5	5	5	5	5	5	5	5	5	5	4	5	5	5	5	4.66667	5	5	4.33333	4.66667	5
1057	5	5	5	5	5	5	5	5	5	4	4	5	4	4	5	5	5	5	5	5	5	5	5	5	5	5	5	5	5	5	5	4.66667	5	5	4.33333	5	5
1058	5	5	5	5	5	5	5	5	5	4	4	5	4	5	5	5	5	5	5	5	5	5	5	5	5	5	5	5	5	5	5	4.66667	5	5	4.66667	5	5
1059	5	5	5	5	5	5	5	5	5	4	3	5	4	5	5	5	5	5	5	5	5	5	5	5	5	5	5	5	5	5	5	4.5	5	5	4.66667	5	5
1060	5	5	5	5	5	5	5	5	5	4	4	5	5	5	5	5	4	4	5	5	5	5	5	5	5	5	5	5	5	5	5	4.66667	4.6	5	5	5	5
1061	5	5	5	5	5	5	5	5	5	4	4	5	5	5	5	5	4	4	5	5	5	5	5	5	5	5	5	5	5	5	5	4.66667	4.6	5	5	5	5
1062	5	5	5	5	5	5	5	5	5	5	5	5	5	5	5	5	4	4	5	5	5	5	5	5	5	5	5	5	5	5	5	5	4.6	5	5	5	5
1063	5	5	5	5	5	5	5	5	5	5	5	5	5	5	5	5	4	3	5	5	5	5	5	5	5	5	5	5	5	5	5	5	4.4	5	5	5	5
1064	5	5	5	5	5	5	5	5	5	5	5	5	5	5	5	5	4	4	5	5	5	5	5	5	5	5	5	5	5	5	5	5	4.6	5	5	5	5
1065	5	5	5	5	5	5	5	5	5	5	5	5	5	5	5	5	4	4	5	5	5	5	5	5	5	5	5	5	5	5	5	5	4.6	5	5	5	5
1066	5	5	5	5	5	5	5	5	5	5	5	5	5	5	5	5	5	5	5	5	5	5	5	5	5	5	5	5	5	5	5	5	5	5	5	5	5
1067	5	5	5	5	5	5	5	5	5	5	5	5	5	5	5	5	4	4	5	5	5	5	5	5	5	5	5	5	5	5	5	5	4.6	5	5	5	5
1068	5	5	5	5	5	5	5	5	5	5	5	5	5	5	5	5	4	5	5	5	5	5	5	5	5	5	5	5	5	5	5	5	4.8	5	5	5	5
1069	5	5	5	5	5	5	5	5	5	5	5	5	5	5	5	5	3	5	5	5	5	5	5	5	5	5	5	5	5	5	5	5	4.6	5	5	5	5
1070	5	5	5	5	5	5	5	5	5	5	5	5	5	5	5	5	4	5	5	5	5	5	5	5	5	5	5	5	5	4	5	5	4.8	5	5	5	4.66667
1071	5	5	5	5	5	5	5	5	5	5	5	5	5	5	5	5	4	5	5	5	5	5	5	5	5	5	5	5	5	4	5	5	4.8	5	5	5	4.66667
1072	5	5	5	5	5	5	5	5	5	5	5	5	5	5	5	5	4	5	5	5	5	5	5	5	5	5	5	5	5	4	5	5	4.8	5	5	5	4.66667
1073	5	5	5	5	5	5	5	5	5	5	5	5	5	5	5	5	3	5	5	5	5	5	5	5	5	5	5	5	5	4	5	5	4.6	5	5	5	4.66667
1074	5	5	5	5	5	5	5	5	5	5	5	5	4	5	5	5	5	5	5	5	5	5	5	5	5	5	5	5	5	4	5	5	5	5	4.66667	5	4.66667
1075	4	4	5	5	3	4	5	5	5	5	5	5	4	5	5	5	4	5	5	5	5	5	5	5	5	5	4	5	5	4	4.16667	5	4.8	5	4.66667	4.66667	4.66667
1076	5	4	5	5	5	4	5	5	5	5	5	5	5	5	5	5	4	5	5	5	5	5	5	5	5	5	4	5	5	3	4.66667	5	4.8	5	5	4.66667	4.33333
1077	5	5	5	5	5	5	5	5	5	5	5	5	4	5	5	5	4	5	5	5	5	5	5	5	5	5	2	5	5	4	5	5	4.8	5	4.66667	4	4.66667
1078	5	5	5	5	5	5	5	5	5	5	5	5	4	5	5	5	4	5	5	5	2	5	5	5	5	5	4	5	5	4	5	5	4.8	4.25	4.66667	4.66667	4.66667
1079	5	5	5	5	5	5	5	5	5	5	5	5	4	5	5	5	3	5	5	5	1	5	5	5	5	5	5	5	5	5	5	5	4.6	4	4.66667	5	5
1080	5	5	5	5	5	5	5	4	5	4	4	5	4	5	5	5	4	5	5	5	2	5	5	5	5	5	4	5	5	3	5	4.5	4.8	4.25	4.66667	4.66667	4.33333
1081	5	5	5	5	5	5	5	4	5	4	4	5	4	5	5	5	5	5	5	5	1	5	5	5	5	5	4	5	5	4	5	4.5	5	4	4.66667	4.66667	4.66667
1082	4	3	5	5	4	3	5	5	5	5	5	5	4	5	5	5	5	5	5	5	2	5	5	5	5	5	4	5	5	2	4	5	5	4.25	4.66667	4.66667	4
1083	5	4	5	5	5	4	5	5	5	5	5	5	4	5	5	5	5	5	5	5	5	5	5	5	5	5	3	5	5	4	4.66667	5	5	5	4.66667	4.33333	4.66667
1084	4	4	5	5	4	4	5	5	5	5	5	5	4	5	5	5	5	5	5	5	5	5	5	5	5	5	4	5	5	3	4.33333	5	5	5	4.66667	4.66667	4.33333
1085	4	3	5	5	4	4	5	5	5	5	5	5	4	5	5	5	4	5	5	5	5	5	5	5	5	5	4	5	5	2	4.16667	5	4.8	5	4.66667	4.66667	4
1086	5	5	5	5	5	5	5	5	5	5	5	5	5	5	5	5	5	5	5	5	5	5	5	5	5	5	4	5	5	5	5	5	5	5	5	4.66667	5
1087	5	5	5	5	5	5	5	5	5	5	5	5	5	5	5	5	4	5	5	5	5	5	5	5	5	5	5	5	5	5	5	5	4.8	5	5	5	5
1088	5	5	5	5	5	5	5	5	5	5	5	5	5	5	5	5	4	5	5	5	5	5	5	5	5	5	3	5	5	5	5	5	4.8	5	5	4.33333	5
1089	5	5	5	5	5	5	5	5	5	5	5	5	5	5	5	5	5	5	5	5	5	5	5	5	5	5	3	5	5	5	5	5	5	5	5	4.33333	5
1090	5	5	5	5	5	5	5	5	5	5	5	5	5	5	5	5	4	5	5	5	5	5	4	5	5	5	4	5	5	5	5	5	4.8	4.75	5	4.66667	5
1091	5	5	5	5	5	5	5	5	5	5	5	5	5	5	5	5	5	5	5	5	5	4	5	5	5	5	5	5	5	5	5	5	5	4.75	5	5	5
1092	5	5	5	5	5	5	5	5	5	5	5	5	5	5	5	5	4	5	5	5	5	5	5	5	5	5	4	5	5	5	5	5	4.8	5	5	4.66667	5
1093	5	5	5	5	5	5	5	5	5	5	5	5	5	5	5	5	4	5	5	5	5	5	5	5	5	5	3	5	5	5	5	5	4.8	5	5	4.33333	5
1094	5	5	5	5	5	5	5	5	5	5	5	5	5	5	5	5	4	5	5	5	5	5	5	5	5	5	5	5	5	5	5	5	4.8	5	5	5	5
1095	5	5	5	5	5	5	5	5	5	5	5	5	5	5	5	5	5	5	5	3	5	5	5	5	5	5	4	5	5	5	5	5	4.6	5	5	4.66667	5
1096	5	5	5	5	5	5	5	5	5	5	5	5	5	5	5	5	4	5	5	4	5	5	5	5	5	5	3	5	5	5	5	5	4.6	5	5	4.33333	5
1097	5	5	5	5	5	5	5	5	5	5	5	5	5	5	5	5	4	5	5	4	5	5	5	5	5	5	4	5	5	5	5	5	4.6	5	5	4.66667	5
1098	5	5	5	5	5	5	5	5	5	5	5	4	5	5	5	5	5	5	5	4	5	5	5	5	5	5	4	5	5	5	5	4.83333	4.8	5	5	4.66667	5
1099	5	5	5	5	5	5	5	5	5	5	5	5	5	5	5	5	5	5	5	5	5	5	5	5	5	5	5	5	5	5	5	5	5	5	5	5	5
1100	5	5	5	5	5	5	5	5	5	5	5	3	5	5	4	5	5	5	5	3	5	5	5	5	5	5	3	5	5	5	5	4.66667	4.6	5	4.66667	4.33333	5
1101	5	5	5	5	5	4	5	5	5	5	5	3	5	5	3	5	5	5	5	3	2	5	5	5	5	5	4	5	5	5	4.83333	4.66667	4.6	4.25	4.33333	4.66667	5
1102	5	5	5	5	5	4	5	5	5	5	5	5	5	5	4	5	5	5	5	4	3	5	5	5	5	5	5	5	5	5	4.83333	5	4.8	4.5	4.66667	5	5
1103	5	5	5	5	5	4	5	5	5	5	5	4	5	5	4	5	5	5	5	4	1	5	5	5	5	5	4	5	5	5	4.83333	4.83333	4.8	4	4.66667	4.66667	5
1104	5	5	5	5	5	4	5	5	5	5	5	4	5	5	5	5	5	5	5	4	3	5	5	5	5	5	4	5	5	5	4.83333	4.83333	4.8	4.5	5	4.66667	5
1105	5	5	3	5	5	4	5	5	5	5	5	4	5	5	4	5	5	5	5	5	1	5	5	5	5	5	4	5	5	5	4.5	4.83333	5	4	4.66667	4.66667	5
1106	5	5	5	5	5	4	5	5	5	5	5	5	5	5	5	5	5	5	5	4	4	5	5	5	5	5	5	5	5	5	4.83333	5	4.8	4.75	5	5	5
1107	5	5	5	5	5	4	5	5	5	5	5	4	5	5	5	5	5	5	5	4	1	5	5	5	5	5	3	5	5	5	4.83333	4.83333	4.8	4	5	4.33333	5
1108	5	5	5	5	5	4	5	5	5	5	5	4	5	5	5	5	5	5	5	5	1	5	5	5	5	5	4	5	5	5	4.83333	4.83333	5	4	5	4.66667	5
1109	5	5	5	5	3	4	5	5	5	5	5	5	5	5	5	5	5	5	5	4	1	5	5	5	5	5	4	5	5	5	4.5	5	4.8	4	5	4.66667	5
1110	5	5	5	5	5	4	5	5	5	5	5	4	5	5	5	5	5	5	5	4	2	5	5	5	5	5	4	5	5	5	4.83333	4.83333	4.8	4.25	5	4.66667	5
1111	5	5	5	5	5	4	5	5	5	5	5	5	5	5	5	5	5	5	5	4	2	5	5	5	5	5	5	5	5	4	4.83333	5	4.8	4.25	5	5	4.66667
1112	5	5	5	5	5	5	5	5	5	5	5	5	5	5	5	5	5	5	5	5	2	5	5	5	5	5	5	5	5	4	5	5	5	4.25	5	5	4.66667
1113	5	5	5	5	5	5	5	5	5	5	5	5	5	5	5	5	5	5	5	5	3	5	5	5	5	5	5	5	5	3	5	5	5	4.5	5	5	4.33333
1114	5	5	5	5	5	5	5	5	5	5	5	5	5	5	5	5	5	5	5	5	2	5	5	5	5	5	5	5	5	3	5	5	5	4.25	5	5	4.33333
1115	5	5	5	5	5	5	5	5	5	5	5	5	5	5	5	5	4	5	5	5	1	5	5	5	5	5	5	5	5	4	5	5	4.8	4	5	5	4.66667
1116	5	5	5	5	5	5	5	5	5	5	5	5	5	5	5	5	5	5	5	5	5	5	5	5	5	5	5	5	5	4	5	5	5	5	5	5	4.66667
1117	5	5	5	5	5	5	5	5	5	5	5	5	5	5	5	5	4	5	5	5	5	5	5	5	5	5	5	5	5	3	5	5	4.8	5	5	5	4.33333
1118	5	5	5	5	5	5	5	5	5	5	5	5	5	5	5	5	4	5	5	5	5	5	1	1	5	5	5	5	5	3	5	5	4.8	3	5	5	4.33333
1119	5	5	5	5	5	5	5	5	5	5	5	5	5	4	5	5	2	5	5	5	5	5	2	4	5	5	5	5	5	4	5	5	4.4	4	4.66667	5	4.66667
1120	5	5	3	5	5	5	5	5	5	5	5	5	5	5	3	5	3	5	5	5	5	5	4	3	5	5	5	3	5	4	4.66667	5	4.6	4.25	4.33333	5	4
1121	5	5	5	5	5	5	4	4	4	4	4	5	5	5	4	5	4	5	5	5	5	5	4	4	5	5	5	2	5	4	5	4.16667	4.8	4.5	4.66667	5	3.66667
1122	5	5	5	5	5	5	5	5	5	5	4	5	5	5	5	5	4	5	5	5	5	5	4	4	5	5	5	5	5	5	5	4.83333	4.8	4.5	5	5	5
1123	5	5	5	5	5	5	4	4	4	4	4	5	5	5	4	5	4	5	5	4	5	5	2	2	5	5	5	4	5	2	5	4.16667	4.6	3.5	4.66667	5	3.66667
1124	5	5	5	5	5	5	2	4	4	3	4	5	5	5	3	5	4	5	5	4	5	5	3	3	5	5	5	4	5	4	5	3.66667	4.6	4	4.33333	5	4.33333
1125	5	5	5	5	5	5	5	4	4	4	4	5	5	5	5	5	5	5	5	5	5	5	5	4	5	5	5	3	5	4	5	4.33333	5	4.75	5	5	4
1126	5	5	5	5	5	5	5	5	5	4	4	5	5	5	4	5	2	5	5	4	5	5	4	1	5	5	5	4	5	4	5	4.66667	4.2	3.75	4.66667	5	4.33333
1127	5	5	5	5	5	5	5	5	5	5	4	5	5	5	5	5	4	5	5	4	5	5	1	1	5	5	5	3	5	4	5	4.83333	4.6	3	5	5	4
1128	5	5	5	5	5	5	5	5	5	3	3	5	5	5	5	5	5	5	5	5	5	5	2	3	5	5	5	3	5	3	5	4.33333	5	3.75	5	5	3.66667
1129	5	5	5	5	5	5	5	5	5	5	4	5	5	5	4	5	4	5	5	4	5	5	4	4	5	5	5	1	5	4	5	4.83333	4.6	4.5	4.66667	5	3.33333
1130	5	5	5	5	5	4	5	5	5	4	5	5	5	5	5	5	5	5	5	5	5	5	5	4	5	5	5	4	5	4	4.83333	4.83333	5	4.75	5	5	4.33333
1131	5	4	4	5	4	3	5	5	5	3	5	5	5	5	3	5	3	5	5	3	5	5	2	2	5	5	5	4	5	3	4.16667	4.66667	4.2	3.5	4.33333	5	4
1132	5	5	4	5	5	4	5	5	5	4	5	5	5	5	5	5	3	5	5	4	4	5	3	1	5	5	5	5	5	5	4.66667	4.83333	4.4	3.25	5	5	5
1133	5	2	4	5	5	5	5	5	5	5	5	5	5	5	5	5	5	5	5	5	5	4	1	1	5	5	5	3	5	4	4.33333	5	5	2.75	5	5	4
1134	5	2	2	5	4	4	5	5	5	4	4	5	5	5	5	5	5	5	5	4	5	5	2	1	5	5	5	3	5	2	3.66667	4.66667	4.8	3.25	5	5	3.33333
1135	5	5	5	5	5	5	5	5	5	4	4	5	5	5	5	5	2	5	5	2	5	5	1	1	5	5	5	4	5	2	5	4.66667	3.8	3	5	5	3.66667
1136	5	5	5	5	5	5	5	5	5	5	4	4	5	5	5	5	2	5	5	3	5	5	2	2	5	5	5	2	5	2	5	4.66667	4	3.5	5	5	3
1137	5	5	5	5	5	5	5	5	5	2	1	4	5	5	5	5	4	5	5	4	5	5	4	4	5	5	5	5	5	4	5	3.66667	4.6	4.5	5	5	4.66667
1138	5	5	5	5	5	5	5	5	5	4	5	4	5	5	5	5	5	5	5	4	5	5	2	2	5	5	5	2	5	2	5	4.66667	4.8	3.5	5	5	3
1139	5	5	5	5	5	5	5	5	5	4	3	5	5	5	5	5	5	5	5	3	5	5	4	3	5	5	5	4	5	4	5	4.5	4.6	4.25	5	5	4.33333
1140	5	5	5	5	5	5	4	5	5	2	4	4	5	5	5	5	2	5	5	1	5	5	1	1	5	5	5	4	5	4	5	4	3.6	3	5	5	4.33333
1141	5	5	5	5	5	5	1	5	5	1	1	1	5	5	5	5	5	5	5	5	5	5	5	4	5	5	5	3	5	2	5	2.33333	5	4.75	5	5	3.33333
1142	5	5	5	5	5	5	3	5	5	4	5	4	5	5	5	5	4	5	5	4	5	5	2	1	5	5	5	3	5	4	5	4.33333	4.6	3.25	5	5	4
1143	5	5	5	5	5	5	5	5	5	5	5	5	5	5	5	5	1	5	5	5	5	5	1	1	5	5	5	1	5	3	5	5	4.2	3	5	5	3
1144	5	5	5	5	5	5	5	5	5	5	5	5	5	5	5	5	4	5	5	3	5	5	3	3	5	5	5	1	5	3	5	5	4.4	4	5	5	3
1145	5	5	5	5	5	5	5	5	5	5	5	5	5	5	5	5	4	3	5	3	5	5	1	2	5	5	5	4	5	4	5	5	4	3.25	5	5	4.33333
1146	5	5	5	5	5	5	5	5	5	5	5	5	4	5	5	2	2	2	5	2	5	5	2	2	5	5	5	4	5	4	5	5	2.6	3.5	4.66667	5	4.33333
1147	5	5	5	5	5	5	5	5	5	5	5	5	5	5	5	5	5	4	5	5	5	5	1	4	5	5	5	5	5	3	5	5	4.8	3.75	5	5	4.33333
1148	5	5	5	5	5	5	5	5	5	5	5	5	2	2	1	4	4	4	5	4	5	5	4	2	5	5	5	4	5	4	5	5	4.2	4	1.66667	5	4.33333
1149	5	5	5	5	5	5	5	5	5	5	5	5	4	2	2	2	2	2	5	2	5	5	2	2	5	5	5	1	5	2	5	5	2.6	3.5	2.66667	5	2.66667
1150	5	5	5	5	5	5	5	5	5	5	5	5	5	5	5	2	2	2	5	3	5	5	5	5	5	5	5	5	5	5	5	5	2.8	5	5	5	5
1151	5	5	5	5	5	5	5	5	5	5	5	5	4	5	3	4	5	4	5	5	5	5	3	5	5	5	5	4	5	5	5	5	4.6	4.5	4	5	4.66667
1152	5	4	3	5	3	3	5	5	5	5	5	5	3	2	3	2	3	3	5	2	5	5	3	4	5	5	5	3	5	5	3.83333	5	3	4.25	2.66667	5	4.33333
1153	5	5	3	5	5	4	5	5	5	5	5	5	5	5	5	4	5	4	5	4	5	5	5	5	5	5	5	2	5	5	4.5	5	4.4	5	5	5	4
1154	5	4	3	5	5	5	5	5	5	5	5	5	2	2	3	3	4	4	5	3	5	5	4	1	5	5	5	1	5	5	4.5	5	3.8	3.75	2.33333	5	3.66667
1155	5	4	4	5	4	4	5	5	5	5	5	5	3	2	2	4	4	4	5	4	5	5	4	4	5	5	5	2	5	5	4.33333	5	4.2	4.5	2.33333	5	4
1156	5	3	2	5	5	4	5	5	5	5	5	5	4	5	3	4	5	3	5	3	5	5	2	3	5	5	5	3	5	5	4	5	4	3.75	4	5	4.33333
1157	5	5	5	5	5	5	5	5	5	5	5	5	4	4	4	4	4	4	5	4	5	5	5	5	5	5	5	4	5	5	5	5	4.2	5	4	5	4.66667
1158	5	5	5	5	5	5	5	5	5	5	5	5	4	4	4	4	4	4	5	5	5	5	5	5	5	5	5	3	5	5	5	5	4.4	5	4	5	4.33333
1159	5	5	5	5	5	5	5	5	5	5	5	5	4	4	4	3	4	4	5	5	4	4	5	5	5	5	5	4	5	5	5	5	4.2	4.5	4	5	4.66667
1160	5	5	5	5	5	5	5	5	5	5	5	5	4	4	4	4	4	4	5	5	5	5	5	5	5	5	5	3	5	5	5	5	4.4	5	4	5	4.33333
1161	5	5	5	5	5	5	5	5	5	5	5	5	4	4	4	4	4	3	5	5	5	4	4	5	5	5	5	4	5	5	5	5	4.2	4.5	4	5	4.66667
1162	5	5	5	5	5	5	5	5	5	5	5	5	5	5	5	5	5	5	5	4	5	5	5	5	5	5	5	5	5	5	5	5	4.8	5	5	5	5
1163	5	5	5	5	5	5	5	5	5	5	5	5	4	4	4	4	4	4	5	5	5	5	5	5	5	5	5	5	5	5	5	5	4.4	5	4	5	5
1164	5	5	5	5	5	5	5	5	5	5	5	5	4	4	4	4	4	4	5	5	5	5	5	5	5	5	5	5	5	5	5	5	4.4	5	4	5	5
1165	5	5	5	3	5	3	5	5	5	5	5	5	5	4	5	3	5	5	5	5	5	5	5	5	5	5	5	5	5	5	4.33333	5	4.6	5	4.66667	5	5
1166	2	5	5	5	5	5	5	5	2	5	5	5	4	4	5	4	5	5	5	5	5	4	4	5	5	3	4	5	5	5	4.5	4.5	4.8	4.5	4.33333	4	5
1167	5	5	4	5	3	5	5	3	5	5	5	5	3	5	5	4	5	5	5	5	4	5	5	5	5	5	4	5	5	5	4.5	4.66667	4.8	4.75	4.33333	4.66667	5
1168	5	3	5	5	3	5	4	5	5	5	5	5	5	5	4	4	5	5	5	5	5	5	5	5	5	4	5	5	5	5	4.33333	4.83333	4.8	5	4.66667	4.66667	5
1169	3	5	5	5	5	5	5	5	5	5	5	5	5	5	5	5	5	3	5	5	5	4	5	5	5	5	5	5	5	5	4.66667	5	4.6	4.75	5	5	5
1170	5	2	2	5	3	2	5	5	5	5	5	4	5	5	4	3	5	5	5	5	5	5	5	5	5	5	5	5	5	5	3.16667	4.83333	4.6	5	4.66667	5	5
1171	5	5	5	5	3	5	5	5	5	5	5	4	5	5	5	5	5	5	5	5	5	5	5	5	5	5	5	5	5	5	4.66667	4.83333	5	5	5	5	5
1172	5	5	5	5	5	5	5	5	5	5	5	4	3	5	5	5	5	5	5	5	5	5	5	5	5	5	5	5	4	5	5	4.83333	5	5	4.33333	5	4.66667
1173	5	5	5	5	3	5	5	5	5	5	5	4	5	5	5	5	5	5	5	5	4	5	5	5	5	5	5	5	4	5	4.66667	4.83333	5	4.75	5	5	4.66667
1174	5	5	5	4	3	5	5	5	5	5	5	4	5	4	5	5	4	5	5	5	5	5	5	5	5	5	5	5	4	5	4.5	4.83333	4.8	5	4.66667	5	4.66667
1175	5	5	5	5	4	5	4	5	5	5	5	5	5	5	5	5	5	5	5	5	5	5	5	5	5	5	5	5	5	5	4.83333	4.83333	5	5	5	5	5
1176	2	5	5	5	5	5	5	5	5	4	4	4	5	5	4	5	5	5	5	5	5	5	5	5	5	5	5	5	4	4	4.5	4.5	5	5	4.66667	5	4.33333
1177	5	5	5	5	5	5	5	5	5	5	5	4	5	4	5	5	5	5	5	5	5	5	5	5	5	5	5	5	5	4	5	4.83333	5	5	4.66667	5	4.66667
1178	5	4	4	5	4	5	5	5	5	5	5	4	5	5	5	5	5	5	5	5	5	5	5	5	5	5	5	5	4	5	4.5	4.83333	5	5	5	5	4.66667
1179	4	3	3	5	3	4	5	5	4	4	4	4	4	5	3	5	5	5	5	5	5	5	5	5	5	5	5	5	2	4	3.66667	4.33333	5	5	4	5	3.66667
1180	5	3	4	5	4	4	4	3	4	4	4	4	4	5	5	5	2	2	5	5	1	5	5	5	5	5	4	5	3	5	4.16667	3.83333	3.8	4	4.66667	4.66667	4.33333
1181	5	5	5	5	5	5	4	5	5	4	5	4	4	5	5	5	4	4	4	4	4	4	5	5	5	5	5	5	4	4	5	4.5	4.2	4.5	4.66667	5	4.33333
1182	5	5	5	5	5	5	4	5	5	4	5	4	4	5	5	4	4	4	4	4	4	4	5	5	5	5	5	5	4	4	5	4.5	4	4.5	4.66667	5	4.33333
1183	5	5	5	5	5	5	4	5	5	4	5	4	4	5	5	4	4	4	4	4	5	4	5	5	5	5	5	5	4	4	5	4.5	4	4.75	4.66667	5	4.33333
1184	5	5	5	5	5	5	4	5	5	4	5	4	4	5	5	5	4	5	4	4	5	4	5	5	5	5	5	5	5	5	5	4.5	4.4	4.75	4.66667	5	5
1185	5	5	5	5	5	5	4	5	5	4	5	4	5	5	5	5	5	5	4	4	5	5	5	5	5	5	5	5	5	5	5	4.5	4.6	5	5	5	5
1186	5	5	5	5	5	5	4	5	5	4	5	4	5	5	5	5	5	5	4	4	5	5	5	5	5	5	5	5	5	5	5	4.5	4.6	5	5	5	5
1187	5	5	5	5	5	5	4	5	5	4	5	4	5	5	5	5	5	5	4	4	5	5	5	5	5	5	5	5	5	5	5	4.5	4.6	5	5	5	5
1188	5	5	5	5	5	5	4	5	5	4	5	4	5	5	5	5	5	5	5	5	5	5	5	5	5	5	5	5	3	5	5	4.5	5	5	5	5	4.33333
1189	5	5	5	5	5	5	4	5	5	4	5	4	5	5	5	5	5	5	5	5	5	5	5	5	5	5	5	5	5	5	5	4.5	5	5	5	5	5
1190	5	5	5	3	5	5	4	5	5	4	5	4	5	5	5	5	5	5	5	5	5	5	5	5	5	5	5	5	5	5	4.66667	4.5	5	5	5	5	5
1191	5	5	5	5	5	5	4	5	5	4	5	5	5	5	5	5	5	5	5	5	5	5	5	5	5	5	5	5	5	5	5	4.66667	5	5	5	5	5
1192	4	3	3	5	4	4	5	5	5	5	5	4	5	5	5	5	5	5	5	5	5	5	5	5	5	5	5	5	5	5	3.83333	4.83333	5	5	5	5	5
1193	5	5	5	5	5	5	5	5	5	5	5	4	5	5	5	5	5	5	5	5	5	5	5	5	5	5	5	5	5	5	5	4.83333	5	5	5	5	5
1194	5	5	5	5	5	5	5	5	5	5	5	5	5	5	5	5	5	5	5	5	5	5	5	5	5	5	5	5	5	5	5	5	5	5	5	5	5
1195	5	5	5	5	5	5	5	5	5	5	5	4	5	5	5	5	5	5	5	5	5	5	5	5	5	5	5	5	5	5	5	4.83333	5	5	5	5	5
1196	5	5	5	5	5	5	5	5	5	5	5	4	5	5	5	5	5	5	5	5	5	5	5	5	5	5	5	5	5	5	5	4.83333	5	5	5	5	5
1197	5	5	5	5	5	5	5	5	5	5	5	4	5	5	5	5	5	5	5	5	5	5	5	5	5	5	5	5	5	5	5	4.83333	5	5	5	5	5
1198	3	3	4	2	5	4	5	5	5	5	5	4	5	5	5	4	5	5	5	5	5	5	5	5	5	5	5	5	5	5	3.5	4.83333	4.8	5	5	5	5
1199	5	5	5	5	5	5	5	5	5	5	5	4	5	5	5	4	5	5	5	5	5	5	5	5	5	5	4	5	5	5	5	4.83333	4.8	5	5	4.66667	5
1200	5	5	5	5	5	5	5	5	5	5	5	5	5	5	5	4	5	5	5	5	5	5	5	5	5	5	4	5	5	5	5	5	4.8	5	5	4.66667	5
1201	4	3	4	5	5	4	5	5	5	5	5	4	4	5	5	4	5	5	5	5	5	5	5	5	5	5	4	5	5	5	4.16667	4.83333	4.8	5	4.66667	4.66667	5
1202	5	5	5	5	5	4	5	5	5	5	5	4	4	5	5	4	5	5	5	5	5	5	5	5	5	5	5	5	5	5	4.83333	4.83333	4.8	5	4.66667	5	5
1203	4	4	4	5	5	4	5	5	5	5	5	5	4	5	5	4	5	5	5	5	5	5	5	5	5	5	4	5	5	5	4.33333	5	4.8	5	4.66667	4.66667	5
1204	5	5	5	5	5	5	5	5	5	5	5	5	5	5	5	4	5	5	5	5	5	5	5	5	5	5	4	5	5	5	5	5	4.8	5	5	4.66667	5
1205	4	3	3	5	5	5	5	5	5	5	5	5	5	5	5	5	5	5	5	5	5	5	5	5	5	5	5	5	5	5	4.16667	5	5	5	5	5	5
1206	5	5	5	5	5	5	5	5	5	5	5	5	5	5	5	5	5	5	5	5	5	5	5	5	5	5	5	5	5	5	5	5	5	5	5	5	5
1207	5	5	4	5	5	4	5	5	5	5	5	5	5	5	5	5	5	5	5	5	5	5	5	5	5	5	5	5	5	5	4.66667	5	5	5	5	5	5
1208	5	5	5	5	5	4	5	5	5	5	5	5	5	5	5	5	5	5	5	5	5	5	5	5	5	5	5	5	5	5	4.83333	5	5	5	5	5	5
1209	5	5	5	5	5	4	5	5	5	5	5	5	5	5	5	5	5	5	5	5	5	5	5	5	5	5	5	5	5	5	4.83333	5	5	5	5	5	5
1210	5	5	5	5	5	4	5	5	5	5	5	5	5	5	5	5	5	5	5	5	5	5	5	5	5	5	5	5	5	5	4.83333	5	5	5	5	5	5
1211	4	3	3	5	5	4	5	5	5	5	5	5	5	5	5	5	5	5	5	5	5	5	5	5	5	5	5	5	4	5	4	5	5	5	5	5	4.66667
1212	5	4	4	5	5	4	5	5	5	5	5	5	5	5	5	5	5	5	5	5	5	5	5	5	5	5	5	5	4	5	4.5	5	5	5	5	5	4.66667
1213	2	3	3	5	5	3	5	5	5	5	5	5	5	5	5	5	4	5	5	5	5	5	5	5	5	5	5	5	3	5	3.5	5	4.8	5	5	5	4.33333
1214	5	5	5	5	5	5	5	5	5	5	5	5	5	5	5	5	4	5	5	5	5	5	5	5	5	5	5	5	4	5	5	5	4.8	5	5	5	4.66667
1215	4	5	5	5	5	4	5	5	5	5	5	5	5	5	5	5	5	5	5	5	5	5	5	5	5	5	5	5	5	5	4.66667	5	5	5	5	5	5
1216	4	3	4+H37:H112	5	5	5	5	5	5	5	5	5	5	5	5	5	5	5	5	5	5	5	5	5	5	5	5	5	3	5	4.4	5	5	5	5	5	4.33333
1217	3	3	4	5	5	4	5	5	5	5	5	5	5	5	5	5	5	5	5	5	5	5	5	5	5	5	5	5	3	5	4	5	5	5	5	5	4.33333
1218	4	3	4	5	5	4	5	5	5	5	5	5	5	5	5	5	4	5	5	5	5	5	5	5	5	5	5	5	1	5	4.16667	5	4.8	5	5	5	3.66667
1219	4	4	4	5	5	5	5	5	5	5	5	5	5	4	5	5	4	5	5	5	5	5	5	5	5	5	5	5	4	5	4.5	5	4.8	5	4.66667	5	4.66667
1220	5	5	5	5	5	4	5	5	5	5	5	5	5	5	5	5	5	5	5	5	5	5	5	5	5	5	5	5	5	5	4.83333	5	5	5	5	5	5
1221	5	4	4	5	5	5	5	5	5	5	5	5	5	4	4	5	4	5	5	5	5	5	5	5	5	5	5	5	3	5	4.66667	5	4.8	5	4.33333	5	4.33333
1222	4	3	3	5	5	4	5	5	5	5	5	5	5	4	5	5	4	5	5	5	5	5	5	5	5	5	5	5	4	5	4	5	4.8	5	4.66667	5	4.66667
1223	5	5	5	5	5	5	5	5	5	5	5	5	5	4	4	5	4	5	5	5	5	5	5	5	5	5	5	5	4	5	5	5	4.8	5	4.33333	5	4.66667
1224	5	5	5	5	5	5	5	5	5	5	5	4	5	5	4	5	3	5	5	5	5	5	5	5	5	5	5	5	4	5	5	4.83333	4.6	5	4.66667	5	4.66667
1225	5	5	5	5	5	5	5	5	5	5	5	5	5	5	5	5	5	5	5	5	5	5	5	5	5	5	5	5	3	5	5	5	5	5	5	5	4.33333
1226	5	5	5	5	5	5	5	5	5	5	5	4	5	5	4	5	5	5	5	5	5	5	5	5	5	5	5	5	4	5	5	4.83333	5	5	4.66667	5	4.66667
1227	5	5	5	5	5	5	5	5	5	5	5	5	5	5	5	5	5	5	5	5	5	5	5	5	5	5	5	5	4	5	5	5	5	5	5	5	4.66667
1228	5	5	5	5	5	5	5	5	5	5	5	4	5	5	5	5	2	5	5	5	5	5	5	5	5	5	5	5	2	5	5	4.83333	4.4	5	5	5	4
1229	5	5	5	5	5	5	5	5	5	5	5	4	5	5	5	5	5	5	5	5	5	5	5	5	5	5	5	5	5	5	5	4.83333	5	5	5	5	5
1230	5	5	5	5	5	5	5	5	5	5	5	4	5	5	5	5	5	5	5	5	5	5	5	5	5	5	5	5	5	5	5	4.83333	5	5	5	5	5
1231	5	5	5	5	5	5	5	5	5	5	5	5	5	5	5	5	3	5	5	5	5	5	5	5	5	5	5	5	5	5	5	5	4.6	5	5	5	5
1232	5	5	5	5	5	5	5	5	5	5	5	5	5	5	5	5	4	5	5	5	5	5	5	5	5	5	5	5	5	5	5	5	4.8	5	5	5	5
1233	5	5	5	5	5	5	5	5	5	5	5	4	5	5	5	5	5	4	5	5	5	5	5	5	5	5	5	5	5	5	5	4.83333	4.8	5	5	5	5
1234	5	5	5	5	5	5	5	5	5	5	5	4	5	5	5	5	4	4	5	5	5	5	5	5	5	5	5	5	5	5	5	4.83333	4.6	5	5	5	5
1235	5	5	5	5	5	5	5	5	5	5	5	5	5	5	5	5	5	4	5	5	5	5	5	5	5	5	5	5	5	5	5	5	4.8	5	5	5	5
1236	5	5	5	5	5	5	3	4	5	5	5	2	5	5	5	5	4	3	5	5	5	5	5	5	5	5	5	5	5	5	5	4	4.4	5	5	5	5
1237	5	5	5	5	5	5	5	4	5	5	5	4	5	5	5	5	4	4	5	5	5	5	5	5	5	5	5	5	5	5	5	4.66667	4.6	5	5	5	5
1238	5	5	5	5	5	5	5	5	5	5	5	5	5	5	5	5	5	5	5	5	5	5	5	5	5	5	5	5	5	5	5	5	5	5	5	5	5
1239	4	4	3	5	5	4	4	4	5	5	5	4	5	5	5	5	4	2	5	5	5	5	5	5	5	5	5	5	5	5	4.16667	4.5	4.2	5	5	5	5
1240	5	5	5	5	5	5	5	4	5	5	5	5	5	5	5	5	4	4	5	4	5	5	5	5	5	5	5	5	5	5	5	4.83333	4.4	5	5	5	5
1241	4	4	4	5	5	5	4	5	5	5	5	5	5	5	5	5	5	2	5	4	5	5	5	5	5	5	5	5	5	5	4.5	4.83333	4.2	5	5	5	5
1242	5	5	5	5	5	5	5	5	5	5	5	5	5	5	5	5	4	4	5	4	5	5	5	5	5	5	5	5	5	5	5	5	4.4	5	5	5	5
1243	5	5	5	5	5	5	5	5	5	5	5	5	5	5	5	5	5	4	5	4	5	5	5	5	5	5	5	5	5	5	5	5	4.6	5	5	5	5
1244	5	5	4	5	5	5	5	5	5	5	5	5	5	5	5	5	5	5	5	4	5	5	5	5	5	5	5	5	5	5	4.83333	5	4.8	5	5	5	5
1245	5	5	5	5	5	5	5	4	4	4	5	5	5	5	5	5	4	4	5	4	5	5	5	5	5	5	5	5	5	5	5	4.5	4.4	5	5	5	5
1246	5	5	5	5	5	5	2	2	4	4	5	5	5	5	4	5	4	4	5	4	5	5	5	5	5	5	5	5	5	5	5	3.66667	4.4	5	4.66667	5	5
1247	5	5	5	5	5	5	5	5	5	5	5	5	5	5	1	5	4	4	5	4	5	5	5	5	2	5	5	5	5	5	5	5	4.4	5	3.66667	4	5
1248	5	5	5	5	5	5	5	5	5	5	5	5	5	5	5	5	2	2	5	4	5	5	5	5	4	5	5	5	5	5	5	5	3.6	5	5	4.66667	5
1249	5	5	5	5	5	5	5	5	5	5	5	5	5	5	5	5	4	5	5	4	5	5	5	5	3	5	5	5	5	5	5	5	4.6	5	5	4.33333	5
1250	5	5	5	5	5	5	5	5	5	5	5	5	5	5	5	5	5	5	5	5	5	5	5	5	4	5	5	5	5	5	5	5	5	5	5	4.66667	5
1251	5	5	5	5	5	5	5	5	5	5	5	5	5	5	5	5	5	5	5	5	3	5	5	5	1	5	5	5	5	5	5	5	5	4.5	5	3.66667	5
1252	5	5	5	5	5	5	5	5	5	5	5	5	5	5	5	5	5	5	5	5	3	5	5	5	3	5	5	5	5	5	5	5	5	4.5	5	4.33333	5
1253	5	5	5	5	5	5	5	5	5	5	5	5	5	5	5	5	5	5	5	5	5	5	5	5	5	5	5	5	5	5	5	5	5	5	5	5	5
1254	5	5	5	5	5	5	5	5	5	5	5	5	5	5	5	5	5	5	5	4	4	5	5	5	2	5	5	5	5	5	5	5	4.8	4.75	5	4	5
1255	5	5	5	5	5	5	5	5	5	5	5	5	5	5	5	5	5	5	5	4	2	5	5	5	4	5	5	5	5	5	5	5	4.8	4.25	5	4.66667	5
1256	5	5	5	5	5	5	5	5	5	5	5	5	5	5	5	5	5	5	5	4	5	5	5	5	4	5	5	5	2	5	5	5	4.8	5	5	4.66667	4
1257	5	5	5	5	5	5	5	5	5	5	5	5	5	5	5	5	5	5	5	4	5	5	5	5	4	5	5	5	4	5	5	5	4.8	5	5	4.66667	4.66667
1258	5	5	5	5	5	5	5	5	5	5	5	5	5	5	5	5	5	5	5	4	5	5	5	5	5	5	5	5	4	5	5	5	4.8	5	5	5	4.66667
1259	5	5	5	5	5	5	5	5	5	5	5	5	5	5	5	5	5	5	5	5	5	5	5	5	4	5	5	5	4	5	5	5	5	5	5	4.66667	4.66667
1260	5	5	5	5	5	5	5	5	5	5	5	5	5	5	5	5	5	5	5	5	5	5	5	5	5	5	5	5	2	5	5	5	5	5	5	5	4
1261	5	5	5	5	5	5	5	5	5	5	5	5	5	5	5	5	5	5	5	5	5	5	5	5	5	5	5	5	3	5	5	5	5	5	5	5	4.33333
1262	5	5	5	5	5	5	5	5	5	5	5	5	5	5	5	5	5	5	5	5	5	5	5	5	5	5	5	5	2	5	5	5	5	5	5	5	4
1263	5	5	5	5	5	5	3	5	5	4	5	5	5	5	5	5	5	5	5	5	5	5	5	5	5	5	5	5	5	5	5	4.5	5	5	5	5	5
1264	5	5	5	5	5	5	5	5	5	5	5	5	5	4	4	5	5	5	5	5	5	5	5	5	5	5	5	5	5	5	5	5	5	5	4.33333	5	5
1265	5	5	5	5	5	5	4	5	5	3	5	5	5	5	4	5	5	5	5	5	5	5	5	5	5	5	5	5	5	5	5	4.5	5	5	4.66667	5	5
1266	5	5	5	5	5	5	5	5	5	4	5	5	5	4	4	5	5	5	5	5	5	5	5	5	5	5	5	5	5	5	5	4.83333	5	5	4.33333	5	5
1267	5	4	5	5	5	4	4	5	5	4	5	5	5	5	4	5	5	5	5	5	5	5	5	5	5	5	5	5	5	5	4.66667	4.66667	5	5	4.66667	5	5
1268	4	4	3	5	5	4	4	5	5	4	5	5	5	5	4	5	5	5	5	5	5	5	5	5	5	5	5	5	5	5	4.16667	4.66667	5	5	4.66667	5	5
1269	1	2	5	5	5	3	2	5	5	2	5	5	5	5	5	5	5	5	5	5	5	5	5	5	5	5	5	5	5	5	3.5	4	5	5	5	5	5
1270	1	2	5	5	5	1	5	5	5	5	5	5	5	5	5	5	5	5	5	5	5	5	5	5	5	5	5	5	5	5	3.16667	5	5	5	5	5	5
1271	5	5	5	5	5	5	5	5	5	5	5	5	5	5	5	5	5	5	5	5	5	5	5	5	5	5	5	5	5	5	5	5	5	5	5	5	5
1272	4	5	5	5	5	4	5	5	5	5	5	5	5	5	5	5	5	5	5	5	5	5	5	5	5	5	5	5	5	5	4.66667	5	5	5	5	5	5
1273	4	4	5	5	5	5	5	5	5	5	5	5	5	5	5	5	5	5	5	5	5	5	5	5	5	5	5	5	5	5	4.66667	5	5	5	5	5	5
1274	1	2	5	5	5	4	5	5	5	5	5	5	5	5	5	5	5	5	5	5	5	5	5	5	5	5	5	5	5	5	3.66667	5	5	5	5	5	5
1275	4	4	5	5	5	3	5	5	5	5	5	5	5	5	5	5	5	5	5	5	5	5	5	5	5	5	5	5	5	5	4.33333	5	5	5	5	5	5
1276	1	2	5	5	5	2	5	5	5	5	5	5	5	5	5	5	5	5	5	5	5	5	5	5	5	5	5	5	5	5	3.33333	5	5	5	5	5	5
1277	1	1	5	5	5	1	5	5	5	5	5	5	5	5	5	5	5	5	5	5	5	5	5	5	5	5	5	5	5	5	3	5	5	5	5	5	5
1278	4	4	5	5	5	5	5	5	5	5	5	5	5	5	5	5	5	5	5	5	5	5	5	5	5	5	5	5	5	5	4.66667	5	5	5	5	5	5
1279	1	2	5	5	5	1	5	5	5	5	5	5	5	5	5	5	5	5	5	5	5	5	5	5	5	5	5	5	5	5	3.16667	5	5	5	5	5	5
1280	1	2	5	5	5	1	5	5	5	5	5	5	5	5	5	5	5	5	5	5	5	5	5	5	5	5	5	5	5	5	3.16667	5	5	5	5	5	5
1281	4	2	5	5	5	2	5	5	5	5	5	5	5	5	5	5	5	5	5	5	5	5	5	5	5	5	5	5	5	5	3.83333	5	5	5	5	5	5
1282	5	5	5	5	5	5	5	5	5	5	5	5	5	5	5	5	5	5	5	5	5	5	5	5	4	5	5	5	5	5	5	5	5	5	5	4.66667	5
1283	5	5	5	5	5	5	5	5	5	5	5	5	5	5	5	5	5	5	5	5	5	5	5	5	5	5	5	5	1	5	5	5	5	5	5	5	3.66667
1284	5	5	5	5	5	5	5	5	5	4	2	4	5	5	5	5	5	5	5	5	5	5	5	5	4	5	5	5	2	5	5	4.16667	5	5	5	4.66667	4
1285	5	5	5	5	5	5	5	5	5	4	5	5	5	5	5	5	5	5	5	5	5	5	5	5	5	5	5	5	3	5	5	4.83333	5	5	5	5	4.33333
1286	5	5	5	5	5	5	5	5	5	4	4	4	5	4	5	5	5	5	5	5	5	5	5	5	4	5	5	5	4	5	5	4.5	5	5	4.66667	4.66667	4.66667
1287	5	5	5	5	5	5	5	5	5	4	4	4	5	4	5	5	5	5	5	5	5	5	5	5	4	5	5	5	4	5	5	4.5	5	5	4.66667	4.66667	4.66667
1288	5	5	5	5	5	5	5	5	5	4	4	4	4	4	5	5	5	5	5	5	5	5	5	5	4	5	5	5	4	5	5	4.5	5	5	4.33333	4.66667	4.66667
1289	5	5	5	5	5	5	5	5	5	4	4	5	4	4	5	5	5	5	5	5	5	5	5	5	4	5	4	5	4	5	5	4.66667	5	5	4.33333	4.33333	4.66667
1290	5	5	5	5	5	5	5	5	5	4	4	5	4	4	5	5	5	5	5	5	5	5	5	5	4	5	4	5	4	5	5	4.66667	5	5	4.33333	4.33333	4.66667
1291	5	5	5	5	5	5	5	5	5	4	4	5	4	4	5	5	5	5	5	5	5	5	5	5	4	5	4	5	5	5	5	4.66667	5	5	4.33333	4.33333	5
1292	5	5	5	5	5	5	5	5	5	4	4	5	4	4	5	5	5	5	5	5	5	5	5	5	5	5	4	5	5	5	5	4.66667	5	5	4.33333	4.66667	5
1293	5	5	5	5	5	5	5	5	5	4	4	5	4	4	5	5	5	5	5	5	5	5	5	5	5	5	5	5	5	5	5	4.66667	5	5	4.33333	5	5
1294	5	5	5	5	5	5	5	5	5	4	4	5	4	5	5	5	5	5	5	5	5	5	5	5	5	5	5	5	5	5	5	4.66667	5	5	4.66667	5	5
1295	5	5	5	5	5	5	5	5	5	4	3	5	4	5	5	5	5	5	5	5	5	5	5	5	5	5	5	5	5	5	5	4.5	5	5	4.66667	5	5
1296	5	5	5	5	5	5	5	5	5	4	4	5	5	5	5	5	4	4	5	5	5	5	5	5	5	5	5	5	5	5	5	4.66667	4.6	5	5	5	5
1297	5	5	5	5	5	5	5	5	5	4	4	5	5	5	5	5	4	4	5	5	5	5	5	5	5	5	5	5	5	5	5	4.66667	4.6	5	5	5	5
1298	5	5	5	5	5	5	5	5	5	5	5	5	5	5	5	5	4	4	5	5	5	5	5	5	5	5	5	5	5	5	5	5	4.6	5	5	5	5
1299	5	5	5	5	5	5	5	5	5	5	5	5	5	5	5	5	4	3	5	5	5	5	5	5	5	5	5	5	5	5	5	5	4.4	5	5	5	5
1300	5	5	5	5	5	5	5	5	5	5	5	5	5	5	5	5	4	4	5	5	5	5	5	5	5	5	5	5	5	5	5	5	4.6	5	5	5	5
1301	5	5	5	5	5	5	5	5	5	5	5	5	5	5	5	5	4	4	5	5	5	5	5	5	5	5	5	5	5	5	5	5	4.6	5	5	5	5
1302	5	5	5	5	5	5	5	5	5	5	5	5	5	5	5	5	5	5	5	5	5	5	5	5	5	5	5	5	5	5	5	5	5	5	5	5	5
1303	5	5	5	5	5	5	5	5	5	5	5	5	5	5	5	5	4	4	5	5	5	5	5	5	5	5	5	5	5	5	5	5	4.6	5	5	5	5
1304	5	5	5	5	5	5	5	5	5	5	5	5	5	5	5	5	4	5	5	5	5	5	5	5	5	5	5	5	5	5	5	5	4.8	5	5	5	5
1305	5	5	5	5	5	5	5	5	5	5	5	5	5	5	5	5	3	5	5	5	5	5	5	5	5	5	5	5	5	5	5	5	4.6	5	5	5	5
1306	5	5	5	5	5	5	5	5	5	5	5	5	5	5	5	5	4	5	5	5	5	5	5	5	5	5	5	5	5	4	5	5	4.8	5	5	5	4.66667
1307	5	5	5	5	5	5	5	5	5	5	5	5	5	5	5	5	4	5	5	5	5	5	5	5	5	5	5	5	5	4	5	5	4.8	5	5	5	4.66667
1308	5	5	5	5	5	5	5	5	5	5	5	5	5	5	5	5	4	5	5	5	5	5	5	5	5	5	5	5	5	4	5	5	4.8	5	5	5	4.66667
1309	5	5	5	5	5	5	5	4	5	5	5	5	5	5	5	5	3	5	5	5	5	5	5	5	5	5	5	5	5	4	5	4.83333	4.6	5	5	5	4.66667
1310	5	5	5	5	5	5	5	4	5	5	5	5	4	5	5	5	5	5	5	5	5	5	5	5	5	5	5	5	5	4	5	4.83333	5	5	4.66667	5	4.66667
1311	4	4	5	5	3	4	5	4	5	5	5	5	4	5	5	5	4	5	5	5	5	5	5	5	5	5	4	5	5	4	4.16667	4.83333	4.8	5	4.66667	4.66667	4.66667
1312	5	4	5	5	5	4	5	4	5	5	5	5	5	5	5	5	4	5	5	5	5	5	5	5	5	5	4	5	5	3	4.66667	4.83333	4.8	5	5	4.66667	4.33333
1313	5	5	5	5	5	5	5	4	5	5	5	5	4	5	5	5	4	5	5	5	5	5	5	5	5	5	2	5	5	4	5	4.83333	4.8	5	4.66667	4	4.66667
1314	5	5	5	5	5	5	5	4	5	5	5	5	4	5	5	5	4	5	5	5	2	5	5	5	5	5	4	5	5	4	5	4.83333	4.8	4.25	4.66667	4.66667	4.66667
1315	5	5	5	5	5	5	5	4	5	4	4	5	4	5	5	5	3	5	5	5	1	5	5	5	5	5	5	5	5	5	5	4.5	4.6	4	4.66667	5	5
1316	5	5	5	5	5	5	5	4	5	4	4	5	4	5	5	5	4	5	5	5	2	5	5	5	5	5	4	5	5	3	5	4.5	4.8	4.25	4.66667	4.66667	4.33333
1317	5	5	5	5	5	5	5	4	5	4	4	5	4	5	5	5	5	5	5	5	1	5	5	5	5	5	4	5	5	4	5	4.5	5	4	4.66667	4.66667	4.66667
1318	4	3	5	5	4	3	5	5	5	5	5	5	4	5	5	5	5	5	5	5	2	5	5	5	5	5	4	5	5	2	4	5	5	4.25	4.66667	4.66667	4
1319	5	4	5	5	5	4	5	5	5	5	5	5	4	5	5	5	5	5	5	5	5	5	5	5	5	5	3	5	5	4	4.66667	5	5	5	4.66667	4.33333	4.66667
1320	4	4	5	5	4	4	5	5	5	5	5	5	4	5	5	5	5	5	5	5	5	5	5	5	5	5	4	5	5	3	4.33333	5	5	5	4.66667	4.66667	4.33333
1321	4	3	5	5	4	4	5	5	5	5	5	5	4	5	5	5	4	5	5	5	5	5	5	5	5	5	4	5	5	2	4.16667	5	4.8	5	4.66667	4.66667	4
1322	5	5	5	5	5	5	5	5	5	5	5	5	5	5	5	5	5	5	5	5	5	5	5	5	5	5	4	5	5	5	5	5	5	5	5	4.66667	5
1323	5	5	5	5	5	5	5	5	5	5	5	5	5	5	5	5	4	5	5	5	5	5	5	5	5	5	5	5	5	5	5	5	4.8	5	5	5	5
1324	5	5	5	5	5	5	5	5	5	5	5	5	5	5	5	5	4	5	5	5	5	5	5	5	5	5	3	5	5	5	5	5	4.8	5	5	4.33333	5
1325	5	5	5	5	5	5	5	5	5	5	5	5	5	5	5	5	5	5	5	5	5	5	5	5	5	5	3	5	5	5	5	5	5	5	5	4.33333	5
1326	5	5	5	5	5	5	5	5	5	5	5	5	5	5	5	5	4	5	5	5	5	5	4	5	5	5	4	5	5	5	5	5	4.8	4.75	5	4.66667	5
1327	5	5	5	5	5	5	5	5	5	5	5	5	5	5	5	5	5	5	5	5	5	4	5	5	5	5	5	5	5	5	5	5	5	4.75	5	5	5
1328	5	5	5	5	5	5	5	5	5	5	5	5	5	5	5	5	4	5	5	5	5	5	5	5	5	5	4	5	5	5	5	5	4.8	5	5	4.66667	5
1329	5	5	5	5	5	5	5	5	5	5	5	5	5	5	5	5	4	5	5	5	5	5	5	5	5	5	3	5	5	5	5	5	4.8	5	5	4.33333	5
1330	5	5	5	5	5	5	5	5	5	5	5	5	5	5	5	5	4	5	5	5	5	5	5	5	5	5	5	5	5	5	5	5	4.8	5	5	5	5
1331	5	5	5	5	5	5	5	5	5	5	5	5	5	5	5	5	5	5	5	3	5	5	5	5	5	5	4	5	5	5	5	5	4.6	5	5	4.66667	5
1332	5	5	5	5	5	5	5	5	5	5	5	5	5	5	5	5	4	5	5	4	5	5	5	5	5	5	3	5	5	5	5	5	4.6	5	5	4.33333	5
1333	5	5	5	5	5	5	5	5	5	5	5	5	5	5	5	5	4	5	5	4	5	5	5	5	5	5	4	5	5	5	5	5	4.6	5	5	4.66667	5
1334	5	5	5	5	5	5	5	5	5	5	5	4	5	5	5	5	5	5	5	4	5	5	5	5	5	5	4	5	5	5	5	4.83333	4.8	5	5	4.66667	5
1335	5	5	5	5	5	5	5	5	5	5	5	5	5	5	5	5	5	5	5	5	5	5	5	5	5	5	5	5	5	5	5	5	5	5	5	5	5
1336	5	5	5	5	5	5	5	5	5	5	5	3	5	5	4	5	5	5	5	3	5	5	5	5	5	5	3	5	5	5	5	4.66667	4.6	5	4.66667	4.33333	5
1337	5	5	5	5	5	4	5	5	5	5	5	3	5	5	3	5	5	5	5	3	2	5	5	5	5	5	4	5	5	5	4.83333	4.66667	4.6	4.25	4.33333	4.66667	5
1338	5	5	5	5	5	4	5	5	5	5	5	5	5	5	4	5	5	5	5	4	3	5	5	5	5	5	5	5	5	5	4.83333	5	4.8	4.5	4.66667	5	5
1339	5	5	5	5	5	4	5	5	5	5	5	4	5	5	4	5	5	5	5	4	1	5	5	5	5	5	4	5	5	5	4.83333	4.83333	4.8	4	4.66667	4.66667	5
1340	5	5	5	5	5	4	5	5	5	5	5	4	5	5	5	5	5	5	5	4	3	5	5	5	5	5	4	5	5	5	4.83333	4.83333	4.8	4.5	5	4.66667	5
1341	5	5	3	5	5	4	5	5	5	5	5	4	5	5	4	5	5	5	5	5	1	5	5	5	5	5	4	5	5	5	4.5	4.83333	5	4	4.66667	4.66667	5
1342	5	5	5	5	5	4	5	5	5	5	5	5	5	5	5	5	5	5	5	4	4	5	5	5	5	5	5	5	5	5	4.83333	5	4.8	4.75	5	5	5
1343	5	5	5	5	5	4	5	5	5	5	5	4	5	5	5	5	5	5	5	4	1	5	5	5	5	5	3	5	5	5	4.83333	4.83333	4.8	4	5	4.33333	5
1344	5	5	5	5	5	4	5	5	5	5	5	4	5	5	5	5	5	5	5	5	1	5	5	5	5	5	4	5	5	5	4.83333	4.83333	5	4	5	4.66667	5
1345	5	5	5	5	3	4	5	5	5	5	5	5	5	5	5	5	5	5	5	4	1	5	5	5	5	5	4	5	5	5	4.5	5	4.8	4	5	4.66667	5
1346	5	5	5	5	5	4	5	5	5	5	5	4	5	5	5	5	5	5	5	4	2	5	5	5	5	5	4	5	5	5	4.83333	4.83333	4.8	4.25	5	4.66667	5
1347	5	5	5	5	5	4	5	5	5	5	5	5	5	5	5	5	5	5	5	4	2	5	5	5	5	5	5	5	5	4	4.83333	5	4.8	4.25	5	5	4.66667
1348	5	5	5	5	5	5	5	5	5	5	5	5	5	5	5	5	5	5	5	5	2	5	5	5	5	5	5	5	5	4	5	5	5	4.25	5	5	4.66667
1349	5	5	5	5	5	5	5	5	5	5	5	5	5	5	5	5	5	5	5	5	3	5	5	5	5	5	5	5	5	3	5	5	5	4.5	5	5	4.33333
1350	5	5	5	5	5	5	5	5	5	5	5	5	5	5	5	5	5	5	5	5	2	5	5	5	5	5	5	5	5	3	5	5	5	4.25	5	5	4.33333
1351	5	5	5	5	5	5	5	5	5	5	5	5	5	5	5	5	4	5	5	5	1	5	5	5	5	5	5	5	5	4	5	5	4.8	4	5	5	4.66667
1352	5	5	5	5	5	5	5	5	5	5	5	5	5	5	5	5	5	5	5	5	5	5	5	5	5	5	5	5	5	4	5	5	5	5	5	5	4.66667
1353	5	5	5	5	5	5	5	5	5	5	5	5	5	5	5	5	4	5	5	5	5	5	5	5	5	5	5	5	5	3	5	5	4.8	5	5	5	4.33333
1354	5	5	5	5	5	5	5	5	5	5	5	5	5	5	5	5	4	5	5	5	5	5	1	1	5	5	5	5	5	3	5	5	4.8	3	5	5	4.33333
1355	5	5	5	5	5	5	5	5	5	5	5	5	5	4	5	5	2	5	5	5	5	5	2	4	5	5	5	5	5	4	5	5	4.4	4	4.66667	5	4.66667
1356	5	5	3	5	5	5	5	5	5	5	5	5	5	5	3	5	3	5	5	5	5	5	4	3	5	5	5	3	5	4	4.66667	5	4.6	4.25	4.33333	5	4
1357	5	5	5	5	5	5	4	4	4	4	4	5	5	5	4	5	4	5	5	5	5	5	4	4	5	5	5	2	5	4	5	4.16667	4.8	4.5	4.66667	5	3.66667
1358	5	5	5	5	5	5	5	5	5	5	4	5	5	5	5	5	4	5	5	5	5	5	4	4	5	5	5	5	5	5	5	4.83333	4.8	4.5	5	5	5
1359	5	5	5	5	5	5	4	4	4	4	4	5	5	5	4	5	4	5	5	4	5	5	2	2	5	5	5	4	5	2	5	4.16667	4.6	3.5	4.66667	5	3.66667
1360	5	5	5	5	5	5	2	4	4	3	4	5	5	5	3	5	4	5	5	4	5	5	3	3	5	5	5	4	5	4	5	3.66667	4.6	4	4.33333	5	4.33333
1361	5	5	5	5	5	5	5	4	4	4	4	5	5	5	5	5	5	5	5	5	5	5	5	4	5	5	5	3	5	4	5	4.33333	5	4.75	5	5	4
1362	5	5	5	5	5	5	5	5	5	4	4	5	5	5	4	5	2	5	5	4	5	5	4	1	5	5	5	4	5	4	5	4.66667	4.2	3.75	4.66667	5	4.33333
1363	5	5	5	5	5	5	5	5	5	5	4	5	5	5	5	5	4	5	5	4	5	5	1	1	5	5	5	3	5	4	5	4.83333	4.6	3	5	5	4
1364	5	5	5	5	5	5	5	5	5	3	3	5	5	5	5	5	5	5	5	5	5	5	2	3	5	5	5	3	5	3	5	4.33333	5	3.75	5	5	3.66667
1365	5	5	5	5	5	5	5	5	5	5	4	5	5	5	4	5	4	5	5	4	5	5	4	4	5	5	5	1	5	4	5	4.83333	4.6	4.5	4.66667	5	3.33333
1366	5	5	5	5	5	4	5	5	5	4	5	5	5	5	5	5	5	5	5	5	5	5	5	4	5	5	5	4	5	4	4.83333	4.83333	5	4.75	5	5	4.33333
1367	5	4	4	5	4	3	5	5	5	3	5	5	5	5	3	5	3	5	5	3	5	5	2	2	5	5	5	4	5	3	4.16667	4.66667	4.2	3.5	4.33333	5	4
1368	5	5	4	5	5	4	5	5	5	4	5	5	5	5	5	5	3	5	5	4	4	5	3	1	5	5	5	5	5	5	4.66667	4.83333	4.4	3.25	5	5	5
1369	5	2	4	5	5	5	5	5	5	5	5	5	5	5	5	5	5	5	5	5	5	4	1	1	5	5	5	3	5	4	4.33333	5	5	2.75	5	5	4
1370	5	2	2	5	4	4	5	5	5	4	4	5	5	5	5	5	5	5	5	4	5	5	2	1	5	5	5	3	5	2	3.66667	4.66667	4.8	3.25	5	5	3.33333
1371	5	5	5	5	5	5	5	5	5	4	4	5	5	5	5	5	2	5	5	2	5	5	1	1	5	5	5	4	5	2	5	4.66667	3.8	3	5	5	3.66667
1372	5	5	5	5	5	5	5	5	5	5	4	4	5	5	5	5	2	5	5	3	5	5	2	2	5	5	5	2	5	2	5	4.66667	4	3.5	5	5	3
1373	5	5	5	5	5	5	5	5	5	2	1	4	5	5	5	5	4	5	5	4	5	5	4	4	5	5	5	5	5	4	5	3.66667	4.6	4.5	5	5	4.66667
1374	5	5	5	5	5	5	5	5	5	4	5	4	5	5	5	5	5	5	5	4	5	5	2	2	5	5	5	2	5	2	5	4.66667	4.8	3.5	5	5	3
1375	5	5	5	5	5	5	5	5	5	4	3	5	5	5	5	5	5	5	5	3	5	5	4	3	5	5	5	4	5	4	5	4.5	4.6	4.25	5	5	4.33333
1376	5	5	5	5	5	5	4	5	5	2	4	4	5	5	5	5	2	5	5	1	5	5	1	1	5	5	5	4	5	4	5	4	3.6	3	5	5	4.33333
1377	5	5	5	5	5	5	1	5	5	1	1	1	5	5	5	5	5	5	5	5	5	5	5	4	5	5	5	3	5	2	5	2.33333	5	4.75	5	5	3.33333
1378	5	5	5	5	5	5	3	5	5	4	5	4	5	5	5	5	4	5	4	4	5	5	2	1	5	5	5	3	5	4	5	4.33333	4.4	3.25	5	5	4
1379	5	5	5	5	5	5	5	5	5	5	5	5	5	5	5	5	1	5	4	5	5	5	1	1	5	5	5	1	5	3	5	5	4	3	5	5	3
1380	5	5	5	5	5	5	5	5	5	5	5	5	5	5	5	5	4	5	4	3	5	5	3	3	5	5	5	1	5	3	5	5	4.2	4	5	5	3
1381	5	5	5	5	5	5	5	5	5	5	5	5	5	5	5	5	4	3	4	3	5	5	1	2	5	5	5	4	5	4	5	5	3.8	3.25	5	5	4.33333
1382	5	5	5	5	5	5	5	5	5	5	5	5	4	5	5	2	2	2	4	2	5	5	2	2	5	5	5	4	5	4	5	5	2.4	3.5	4.66667	5	4.33333
1383	5	5	5	5	5	5	5	5	5	5	5	5	5	5	5	5	5	4	5	5	5	5	1	4	5	5	5	5	5	3	5	5	4.8	3.75	5	5	4.33333
1384	5	5	5	5	5	5	5	5	5	5	5	5	2	2	1	4	4	4	5	4	5	5	4	2	5	5	5	4	5	4	5	5	4.2	4	1.66667	5	4.33333
1385	5	5	5	5	5	5	5	5	5	5	5	5	4	2	2	2	2	2	5	2	5	5	2	2	5	5	5	1	5	2	5	5	2.6	3.5	2.66667	5	2.66667
1386	5	5	5	5	5	5	5	5	5	5	5	5	5	5	5	2	2	2	5	3	5	5	5	5	5	5	5	5	5	5	5	5	2.8	5	5	5	5
1387	5	5	5	5	5	5	5	5	5	5	5	5	4	5	3	4	5	4	5	5	5	5	3	5	5	5	5	4	5	5	5	5	4.6	4.5	4	5	4.66667
1388	5	4	3	5	3	3	5	5	5	5	5	5	3	2	3	2	3	3	5	2	5	5	3	4	5	5	5	3	5	5	3.83333	5	3	4.25	2.66667	5	4.33333
1389	5	5	3	5	5	4	5	5	5	5	5	5	5	5	5	4	5	4	5	4	5	5	5	5	5	5	5	2	5	5	4.5	5	4.4	5	5	5	4
1390	5	4	3	5	5	5	5	5	5	5	5	5	2	2	3	3	4	4	5	3	5	5	4	1	5	5	5	1	5	5	4.5	5	3.8	3.75	2.33333	5	3.66667
1391	5	4	4	5	4	4	5	5	5	5	5	5	3	2	2	4	4	4	5	4	5	5	4	4	5	5	5	2	5	5	4.33333	5	4.2	4.5	2.33333	5	4
1392	5	3	2	5	5	4	5	5	5	5	5	5	4	5	3	4	5	3	5	3	5	5	2	3	5	5	5	3	5	5	4	5	4	3.75	4	5	4.33333
1393	5	5	5	5	5	5	5	5	5	5	5	5	4	4	4	4	4	4	5	4	5	5	5	5	5	5	5	4	5	5	5	5	4.2	5	4	5	4.66667
1394	5	5	5	5	5	5	5	5	5	5	5	5	4	4	4	4	4	4	5	5	5	5	5	5	5	5	5	3	5	5	5	5	4.4	5	4	5	4.33333
1395	5	5	5	5	5	5	5	5	5	5	5	5	4	4	4	3	4	4	5	5	4	4	5	5	5	5	5	4	5	5	5	5	4.2	4.5	4	5	4.66667
1396	5	5	5	5	5	5	5	5	5	5	5	5	4	4	4	4	4	4	5	5	5	5	5	5	5	5	5	3	5	5	5	5	4.4	5	4	5	4.33333
1397	5	5	5	5	5	5	5	5	5	5	5	5	4	4	4	4	4	3	5	5	5	4	4	5	5	5	5	4	5	5	5	5	4.2	4.5	4	5	4.66667
1398	5	5	5	5	5	5	5	5	5	5	5	5	5	5	5	5	5	5	5	4	5	5	5	5	5	5	5	5	5	5	5	5	4.8	5	5	5	5
1399	5	5	5	5	5	5	5	5	5	5	5	5	4	4	4	4	4	4	5	5	5	5	5	5	5	5	5	5	5	5	5	5	4.4	5	4	5	5
1400	5	5	5	5	5	5	5	5	5	5	5	5	4	4	4	4	4	4	5	5	5	5	5	5	5	5	5	5	5	5	5	5	4.4	5	4	5	5
1401	5	5	5	3	5	3	5	5	5	5	5	5	5	4	5	3	5	5	5	5	5	5	5	5	5	5	5	5	5	5	4.33333	5	4.6	5	4.66667	5	5
1402	2	5	5	5	5	5	5	5	2	5	5	5	4	4	5	4	5	5	5	5	5	4	4	5	5	3	4	5	5	5	4.5	4.5	4.8	4.5	4.33333	4	5
1403	5	5	4	5	3	5	5	3	5	5	5	5	3	5	5	4	5	5	5	5	4	5	5	5	5	5	4	5	5	5	4.5	4.66667	4.8	4.75	4.33333	4.66667	5
1404	5	3	5	5	3	5	4	5	5	5	5	5	5	5	4	4	5	5	5	5	5	5	5	5	5	4	5	5	5	5	4.33333	4.83333	4.8	5	4.66667	4.66667	5
1405	3	5	5	5	5	5	5	5	5	5	5	5	5	5	5	5	5	3	5	5	5	4	5	5	5	5	5	5	5	5	4.66667	5	4.6	4.75	5	5	5
1406	5	2	2	5	3	2	5	5	5	5	5	4	5	5	4	3	5	5	5	5	5	5	5	5	5	5	5	5	5	5	3.16667	4.83333	4.6	5	4.66667	5	5
1407	5	5	5	5	3	5	5	5	5	5	5	4	5	5	5	5	5	5	5	5	5	5	5	5	5	5	5	5	5	5	4.66667	4.83333	5	5	5	5	5
1408	5	5	5	5	5	5	5	5	5	5	5	4	3	5	5	5	5	5	5	5	5	5	5	5	5	5	5	5	4	5	5	4.83333	5	5	4.33333	5	4.66667
1409	5	5	5	5	3	5	5	5	5	5	5	4	5	5	5	5	5	5	5	5	4	5	5	5	5	5	5	5	4	5	4.66667	4.83333	5	4.75	5	5	4.66667
1410	5	5	5	4	3	5	5	5	5	5	5	4	5	4	5	5	4	5	5	5	5	5	5	5	5	5	5	5	4	5	4.5	4.83333	4.8	5	4.66667	5	4.66667
1411	5	5	5	5	4	5	4	5	5	5	5	5	5	5	5	5	5	5	5	5	5	5	5	5	5	5	5	5	5	5	4.83333	4.83333	5	5	5	5	5
1412	2	5	5	5	5	5	5	5	5	4	4	4	5	5	4	5	5	5	5	5	5	5	5	5	5	5	5	5	4	4	4.5	4.5	5	5	4.66667	5	4.33333
1413	5	5	5	5	5	5	5	5	5	5	5	4	5	4	5	5	5	5	5	5	5	5	5	5	5	5	5	5	5	4	5	4.83333	5	5	4.66667	5	4.66667
1414	5	4	4	5	4	5	5	5	5	5	5	4	5	5	5	5	5	5	5	5	5	5	5	5	5	5	5	5	4	5	4.5	4.83333	5	5	5	5	4.66667
1415	4	3	3	5	3	4	5	5	4	4	4	4	4	5	3	5	5	5	5	5	5	5	5	5	5	5	5	5	2	4	3.66667	4.33333	5	5	4	5	3.66667
1416	5	3	4	5	4	4	4	3	4	4	4	4	4	5	5	5	2	2	5	5	1	5	5	5	5	5	4	5	3	5	4.16667	3.83333	3.8	4	4.66667	4.66667	4.33333
1417	5	5	5	5	5	5	4	5	5	4	5	4	4	5	5	5	4	4	4	4	4	4	5	5	5	5	5	5	4	4	5	4.5	4.2	4.5	4.66667	5	4.33333
1418	5	5	5	5	5	5	4	5	5	4	5	4	4	5	5	4	4	4	4	4	4	4	5	5	5	5	5	5	4	4	5	4.5	4	4.5	4.66667	5	4.33333
1419	5	5	5	5	5	5	4	5	5	4	5	4	4	5	5	4	4	4	4	4	5	4	5	5	5	5	5	5	4	4	5	4.5	4	4.75	4.66667	5	4.33333
1420	5	5	5	5	5	5	4	5	5	4	5	4	4	5	5	5	4	5	4	4	5	4	5	5	5	5	5	5	5	5	5	4.5	4.4	4.75	4.66667	5	5
1421	5	5	5	5	5	5	4	5	5	4	5	4	5	5	5	5	5	5	4	4	5	5	5	5	5	5	5	5	5	5	5	4.5	4.6	5	5	5	5
1422	5	5	5	5	5	5	4	5	5	4	5	4	5	5	5	5	5	5	4	4	5	5	5	5	5	5	5	5	5	5	5	4.5	4.6	5	5	5	5
1423	5	5	5	5	5	5	4	5	5	4	5	4	5	5	5	5	5	5	4	4	5	5	5	5	5	5	5	5	5	5	5	4.5	4.6	5	5	5	5
1424	5	5	5	5	5	5	4	5	5	4	5	4	5	5	5	5	5	5	5	5	5	5	5	5	5	5	5	5	3	5	5	4.5	5	5	5	5	4.33333
1425	5	5	5	5	5	5	4	5	5	4	5	4	5	5	5	5	5	5	5	5	5	5	5	5	5	5	5	5	5	5	5	4.5	5	5	5	5	5
1426	5	5	5	3	5	5	4	5	5	4	5	4	5	5	5	5	5	5	5	5	5	5	5	5	5	5	5	5	5	5	4.66667	4.5	5	5	5	5	5
1427	5	5	5	5	5	5	4	5	5	4	5	5	5	5	5	5	5	5	5	5	5	5	5	5	5	5	5	5	5	5	5	4.66667	5	5	5	5	5
1428	4	3	3	5	4	4	5	5	5	5	5	4	5	5	5	5	5	5	5	5	5	5	5	5	5	5	5	5	5	5	3.83333	4.83333	5	5	5	5	5
1429	5	5	5	5	5	5	5	5	5	5	5	4	5	5	5	5	5	5	5	5	5	5	5	5	5	5	5	5	5	5	5	4.83333	5	5	5	5	5
1430	5	5	5	5	5	5	5	5	5	5	5	5	5	5	5	5	5	5	5	5	5	5	5	5	5	5	5	5	5	5	5	5	5	5	5	5	5
1431	5	5	5	5	5	5	5	5	5	5	5	4	5	5	5	5	5	5	5	5	5	5	5	5	5	5	5	5	5	5	5	4.83333	5	5	5	5	5
1432	5	5	5	5	5	5	5	5	5	5	5	4	5	5	5	5	5	5	5	5	5	5	5	5	5	5	5	5	5	5	5	4.83333	5	5	5	5	5
1433	5	5	5	5	5	5	5	5	5	5	5	4	5	5	5	5	5	5	5	5	5	5	5	5	5	5	5	5	5	5	5	4.83333	5	5	5	5	5
1434	3	3	4	2	5	4	5	5	5	5	5	4	5	5	5	4	5	5	5	5	5	5	5	5	5	5	5	5	5	5	3.5	4.83333	4.8	5	5	5	5
1435	5	5	5	5	5	5	5	5	5	5	5	4	5	5	5	4	5	5	5	5	5	5	5	5	5	5	4	5	5	5	5	4.83333	4.8	5	5	4.66667	5
1436	5	5	5	5	5	5	5	5	5	5	5	5	5	5	5	4	5	5	5	5	5	5	5	5	5	5	4	5	5	5	5	5	4.8	5	5	4.66667	5
1437	4	3	4	5	5	4	5	5	5	5	5	4	4	5	5	4	5	5	5	5	5	5	5	5	5	5	4	5	5	5	4.16667	4.83333	4.8	5	4.66667	4.66667	5
1438	5	5	5	5	5	4	5	5	5	5	5	4	4	5	5	4	5	5	5	5	5	5	5	5	5	5	5	5	5	5	4.83333	4.83333	4.8	5	4.66667	5	5
1439	4	4	4	5	5	4	5	5	5	5	5	5	4	5	5	4	5	5	5	5	5	5	5	5	5	5	4	5	5	5	4.33333	5	4.8	5	4.66667	4.66667	5
1440	5	5	5	5	5	5	5	5	5	5	5	5	5	5	5	4	5	5	5	5	5	5	5	5	5	5	4	5	5	5	5	5	4.8	5	5	4.66667	5
1441	4	3	3	5	5	5	5	5	5	5	5	5	5	5	5	5	5	5	5	5	5	5	5	5	5	5	5	5	5	5	4.16667	5	5	5	5	5	5
1442	5	5	5	5	5	5	5	5	5	5	5	5	5	5	5	5	5	5	5	5	5	5	5	5	5	5	5	5	5	5	5	5	5	5	5	5	5
1443	5	5	4	5	5	4	5	5	5	5	5	5	5	5	5	5	5	5	5	5	5	5	5	5	5	5	5	5	5	5	4.66667	5	5	5	5	5	5
1444	5	5	5	5	5	4	5	5	5	5	5	5	5	5	5	5	5	5	5	5	5	5	5	5	5	5	5	5	5	5	4.83333	5	5	5	5	5	5
1445	5	5	5	5	5	4	5	5	5	5	5	5	5	5	5	5	5	5	5	5	5	5	5	5	5	5	5	5	5	5	4.83333	5	5	5	5	5	5
1446	5	5	5	5	5	4	5	5	5	5	5	5	5	5	5	5	5	5	5	5	5	5	5	5	5	5	5	5	5	5	4.83333	5	5	5	5	5	5
1447	4	3	3	5	5	4	5	5	5	5	5	5	5	5	5	5	5	5	5	5	5	5	5	5	5	5	5	5	4	5	4	5	5	5	5	5	4.66667
1448	5	4	4	5	5	4	5	5	5	5	5	5	5	5	5	5	5	5	5	5	5	5	5	5	5	5	5	5	4	5	4.5	5	5	5	5	5	4.66667
1449	2	3	3	5	5	3	5	5	5	5	5	5	5	5	5	5	4	5	5	5	5	5	5	5	5	5	5	5	3	5	3.5	5	4.8	5	5	5	4.33333
1450	5	5	5	5	5	5	5	5	5	5	5	5	5	5	5	5	4	5	5	5	5	5	5	5	5	5	5	5	4	5	5	5	4.8	5	5	5	4.66667
1451	4	5	5	5	5	4	5	5	5	5	5	5	5	5	5	5	5	5	5	5	5	5	5	5	5	5	5	5	5	5	4.66667	5	5	5	5	5	5
1452	4	3	4+H37:H112	5	5	5	5	5	5	5	5	5	5	5	5	5	5	5	5	5	5	5	5	5	5	5	5	5	3	5	4.4	5	5	5	5	5	4.33333
1453	3	3	4	5	5	4	5	5	5	5	5	5	5	5	5	5	5	5	5	5	5	5	5	5	5	5	5	5	3	5	4	5	5	5	5	5	4.33333
1454	4	3	4	5	5	4	5	5	5	5	5	5	5	5	5	5	4	5	5	5	5	5	5	5	5	5	5	5	1	5	4.16667	5	4.8	5	5	5	3.66667
1455	4	4	4	5	5	5	5	5	5	5	5	5	5	4	5	5	4	5	5	5	5	5	5	5	5	5	5	5	4	5	4.5	5	4.8	5	4.66667	5	4.66667
1456	5	5	5	5	5	4	5	5	5	5	5	5	5	5	5	5	5	5	5	5	5	5	5	5	5	5	5	5	5	5	4.83333	5	5	5	5	5	5
1457	5	4	4	5	5	5	5	5	5	5	5	5	5	4	4	5	4	5	5	5	5	5	5	5	5	5	5	5	3	5	4.66667	5	4.8	5	4.33333	5	4.33333
1458	4	3	3	5	5	4	5	5	5	5	5	5	5	4	5	5	4	5	5	5	5	5	5	5	5	5	5	5	4	5	4	5	4.8	5	4.66667	5	4.66667
1459	5	5	5	5	5	5	5	5	5	5	5	5	5	4	4	5	4	5	5	5	5	5	5	5	5	5	5	5	4	5	5	5	4.8	5	4.33333	5	4.66667
1460	5	5	5	5	5	5	5	5	5	5	5	4	5	5	4	5	3	5	5	5	5	5	5	5	5	5	5	5	4	5	5	4.83333	4.6	5	4.66667	5	4.66667
1461	5	5	5	5	5	5	5	5	5	5	5	5	5	5	5	5	5	5	5	5	5	5	5	5	5	5	5	5	3	5	5	5	5	5	5	5	4.33333
1462	5	5	5	5	5	5	5	5	5	5	5	4	5	5	4	5	5	5	5	5	5	5	5	5	5	5	5	5	4	5	5	4.83333	5	5	4.66667	5	4.66667
1463	5	5	5	5	5	5	5	5	5	5	5	5	5	5	5	5	5	5	5	5	5	5	5	5	5	5	5	5	4	5	5	5	5	5	5	5	4.66667
1464	5	5	5	5	5	5	5	5	5	5	5	4	5	5	5	5	2	5	5	5	5	5	5	5	5	5	5	5	2	5	5	4.83333	4.4	5	5	5	4
1465	5	5	5	5	5	5	5	5	5	5	5	4	5	5	5	5	5	5	5	5	5	5	5	5	5	5	5	5	5	5	5	4.83333	5	5	5	5	5
1466	5	5	5	5	5	5	5	5	5	5	5	4	5	5	5	5	5	5	5	5	5	5	5	5	5	5	5	5	5	5	5	4.83333	5	5	5	5	5
1467	5	5	5	5	5	5	5	5	5	5	5	5	5	5	5	5	3	5	5	5	5	5	5	5	5	5	5	5	5	5	5	5	4.6	5	5	5	5
1468	5	5	5	5	5	5	5	5	5	5	5	5	5	5	5	5	4	5	5	5	5	5	5	5	5	5	5	5	5	5	5	5	4.8	5	5	5	5
1469	5	5	5	5	5	5	5	5	5	5	5	4	5	5	5	5	5	4	5	5	5	5	5	5	5	5	5	5	5	5	5	4.83333	4.8	5	5	5	5
1470	5	5	5	5	5	5	5	5	5	5	5	4	5	5	5	5	4	4	5	5	5	5	5	5	5	5	5	5	5	5	5	4.83333	4.6	5	5	5	5
1471	5	5	5	5	5	5	5	5	5	5	5	5	5	5	5	5	5	4	5	5	5	5	5	5	5	5	5	5	5	5	5	5	4.8	5	5	5	5
1472	5	5	5	5	5	5	3	4	5	5	5	2	5	5	5	5	4	3	5	5	5	5	5	5	5	5	5	5	5	5	5	4	4.4	5	5	5	5
1473	5	5	5	5	5	5	5	4	5	5	5	4	5	5	5	5	4	4	5	5	5	5	5	5	5	5	5	5	5	5	5	4.66667	4.6	5	5	5	5
1474	5	5	5	5	5	5	5	5	5	5	5	5	5	5	5	5	5	5	5	5	5	5	5	5	5	5	5	5	5	5	5	5	5	5	5	5	5
1475	4	4	3	5	5	4	4	4	5	5	5	4	5	5	5	5	4	2	5	5	5	5	5	5	5	5	5	5	5	5	4.16667	4.5	4.2	5	5	5	5
1476	5	5	5	5	5	5	5	4	5	5	5	5	5	5	5	5	4	4	5	5	5	5	5	5	5	5	5	5	5	5	5	4.83333	4.6	5	5	5	5
1477	4	4	4	5	5	5	4	5	5	5	5	5	5	5	5	5	5	2	5	5	5	5	5	5	5	5	5	5	5	5	4.5	4.83333	4.4	5	5	5	5
1478	5	5	5	5	5	5	5	5	5	5	5	5	5	5	5	5	4	4	5	5	5	5	5	5	5	5	5	5	5	5	5	5	4.6	5	5	5	5
1479	5	5	5	5	5	5	5	5	5	5	5	5	5	5	5	5	5	4	5	5	5	5	5	5	5	5	5	5	5	5	5	5	4.8	5	5	5	5
1480	5	5	4	5	5	5	5	5	5	5	5	5	5	5	5	5	5	5	5	5	5	5	5	5	5	5	5	5	5	5	4.83333	5	5	5	5	5	5
1481	5	5	5	5	5	5	5	4	4	4	5	5	5	5	5	5	4	4	5	5	5	5	5	5	5	5	5	5	5	5	5	4.5	4.6	5	5	5	5
1482	5	5	5	5	5	5	2	2	4	4	5	5	5	5	4	5	4	4	5	5	5	5	5	5	5	5	5	5	5	5	5	3.66667	4.6	5	4.66667	5	5
1483	5	5	5	5	5	5	5	5	5	5	5	5	5	5	1	5	4	4	5	5	5	5	5	5	2	5	5	5	5	5	5	5	4.6	5	3.66667	4	5
1484	5	5	5	5	5	5	5	5	5	5	5	5	5	5	5	5	2	2	5	5	5	5	5	5	4	5	5	5	5	5	5	5	3.8	5	5	4.66667	5
1485	5	5	5	5	5	5	5	5	5	5	5	5	5	5	5	5	4	5	5	5	5	5	5	5	3	5	5	5	5	5	5	5	4.8	5	5	4.33333	5
1486	5	5	5	5	5	5	5	5	5	5	5	5	5	5	5	5	5	5	5	5	5	5	5	5	4	5	5	5	5	5	5	5	5	5	5	4.66667	5
1487	5	5	5	5	5	5	5	5	5	5	5	5	5	5	5	5	5	5	5	5	3	5	5	5	1	5	5	5	5	5	5	5	5	4.5	5	3.66667	5
1488	5	5	5	5	5	5	5	5	5	5	5	5	5	5	5	5	5	5	5	5	3	5	5	5	3	5	5	5	5	5	5	5	5	4.5	5	4.33333	5
1489	5	5	5	5	5	5	5	5	5	5	5	5	5	5	5	5	5	5	5	5	5	5	5	5	5	5	5	5	5	5	5	5	5	5	5	5	5
1490	5	5	5	5	5	5	5	5	5	5	5	5	5	5	5	5	5	5	5	5	4	5	5	5	2	5	5	5	5	5	5	5	5	4.75	5	4	5
1491	5	5	5	5	5	5	5	5	5	5	5	5	5	5	5	5	5	5	5	5	2	5	5	5	4	5	5	5	5	5	5	5	5	4.25	5	4.66667	5
1492	5	5	5	5	5	5	5	5	5	5	5	5	5	5	5	5	5	5	5	5	5	5	5	5	4	5	5	5	2	5	5	5	5	5	5	4.66667	4
1493	5	5	5	5	5	5	5	5	5	5	5	5	5	5	5	5	5	5	5	5	5	5	5	5	4	5	5	5	4	5	5	5	5	5	5	4.66667	4.66667
1494	5	5	5	5	5	5	5	5	5	5	5	5	5	5	5	5	5	5	5	5	5	5	5	5	5	5	5	5	4	5	5	5	5	5	5	5	4.66667
1495	5	5	5	5	5	5	5	5	5	5	5	5	5	5	5	5	5	5	5	5	5	5	5	5	4	5	5	5	4	5	5	5	5	5	5	4.66667	4.66667
1496	5	5	5	5	5	5	5	5	5	5	5	5	5	5	5	5	5	5	5	5	5	5	5	5	5	5	5	5	2	5	5	5	5	5	5	5	4
1497	5	5	5	5	5	5	5	5	5	5	5	5	5	5	5	5	5	5	5	5	5	5	5	5	5	5	5	5	3	5	5	5	5	5	5	5	4.33333
1498	5	5	5	5	5	5	5	5	5	5	5	5	5	5	5	5	5	5	5	5	5	5	5	5	5	5	5	5	2	5	5	5	5	5	5	5	4
1499	5	5	5	5	5	5	3	5	5	4	5	5	5	5	5	5	5	5	5	5	5	5	5	5	5	5	5	5	5	5	5	4.5	5	5	5	5	5
1500	5	5	5	5	5	5	5	5	5	5	5	5	5	4	4	5	5	5	5	5	5	5	5	5	5	5	5	5	5	5	5	5	5	5	4.33333	5	5
1501	5	5	5	5	5	5	4	5	5	3	5	5	5	5	4	5	5	5	5	5	5	5	5	5	5	5	5	5	5	5	5	4.5	5	5	4.66667	5	5
1502	5	5	5	5	5	5	5	5	5	4	5	5	5	4	4	5	5	5	5	5	5	5	5	5	5	5	5	5	5	5	5	4.83333	5	5	4.33333	5	5
1503	5	4	5	5	5	4	4	5	5	4	5	5	5	5	4	5	5	5	5	5	5	5	5	5	5	5	5	5	5	5	4.66667	4.66667	5	5	4.66667	5	5
1504	4	4	3	5	5	4	4	5	5	4	5	5	5	5	4	5	5	5	5	5	5	5	5	5	5	5	5	5	5	5	4.16667	4.66667	5	5	4.66667	5	5
1505	1	2	5	5	5	3	2	5	5	2	5	5	5	5	5	5	5	5	5	5	5	5	5	5	5	5	5	5	5	5	3.5	4	5	5	5	5	5
1506	1	2	5	5	5	1	5	5	5	5	5	5	5	5	5	5	5	5	5	5	5	5	5	5	5	5	5	5	5	5	3.16667	5	5	5	5	5	5
1507	5	5	5	5	5	5	5	5	5	5	5	5	5	5	5	5	5	5	5	5	5	5	5	5	5	5	5	5	5	5	5	5	5	5	5	5	5
1508	4	5	5	5	5	4	5	5	5	5	5	5	5	5	5	5	5	5	5	5	5	5	5	5	5	5	5	5	5	5	4.66667	5	5	5	5	5	5
1509	4	4	5	5	5	5	5	5	5	5	5	5	5	5	5	5	5	5	5	5	5	5	5	5	5	5	5	5	5	5	4.66667	5	5	5	5	5	5
1510	1	2	5	5	5	4	5	5	5	5	5	5	5	5	5	5	5	5	5	5	5	5	5	5	5	5	5	5	5	5	3.66667	5	5	5	5	5	5
1511	4	4	5	5	5	3	5	5	5	5	5	5	5	5	5	5	5	5	5	5	5	5	5	5	5	5	5	5	5	5	4.33333	5	5	5	5	5	5
1512	1	2	5	5	5	2	5	5	5	5	5	5	5	5	5	5	5	5	5	5	5	5	5	5	5	5	5	5	5	5	3.33333	5	5	5	5	5	5
1513	1	1	5	5	5	1	5	5	5	5	5	5	5	5	5	5	5	5	5	5	5	5	5	5	5	5	5	5	5	5	3	5	5	5	5	5	5
1514	4	4	5	5	5	5	5	5	5	5	5	5	5	5	5	5	5	5	5	5	5	5	5	5	5	5	5	5	5	5	4.66667	5	5	5	5	5	5
1515	1	2	5	5	5	1	5	5	5	5	5	5	5	5	5	5	5	5	5	5	5	5	5	5	5	5	5	5	5	5	3.16667	5	5	5	5	5	5
1516	1	2	5	5	5	1	5	5	5	5	5	5	5	5	5	5	5	5	5	5	5	5	5	5	5	5	5	5	5	5	3.16667	5	5	5	5	5	5
1517	4	2	5	5	5	2	5	5	5	5	5	5	5	5	5	5	5	5	5	5	5	5	5	5	5	5	5	5	5	5	3.83333	5	5	5	5	5	5
1518	5	5	5	5	5	5	5	5	5	5	5	5	5	5	5	5	5	5	5	5	5	5	5	5	4	5	5	5	5	5	5	5	5	5	5	4.66667	5
1519	5	5	5	5	5	5	5	5	5	5	5	5	5	5	5	5	5	5	5	5	5	5	5	5	5	5	5	5	1	5	5	5	5	5	5	5	3.66667
1520	5	5	5	5	5	5	5	5	5	4	2	4	5	5	5	5	5	5	5	5	5	5	5	5	4	5	5	5	2	5	5	4.16667	5	5	5	4.66667	4
1521	5	5	5	5	5	5	5	5	5	4	5	5	5	5	5	5	5	5	5	5	5	5	5	5	5	5	5	5	3	5	5	4.83333	5	5	5	5	4.33333
1522	5	5	5	5	5	5	5	5	5	4	4	4	5	4	5	5	5	5	5	5	5	5	5	5	4	5	5	5	4	5	5	4.5	5	5	4.66667	4.66667	4.66667
1523	5	5	5	5	5	5	5	5	5	4	4	4	5	4	5	5	5	5	5	5	5	5	5	5	4	5	5	5	4	5	5	4.5	5	5	4.66667	4.66667	4.66667
1524	5	5	5	5	5	5	5	5	5	4	4	4	4	4	5	5	5	5	5	5	5	5	5	5	4	5	5	5	4	5	5	4.5	5	5	4.33333	4.66667	4.66667
1525	5	5	5	5	5	5	5	5	5	4	4	5	4	4	5	5	5	5	5	5	5	5	5	5	4	5	4	5	4	5	5	4.66667	5	5	4.33333	4.33333	4.66667
1526	5	5	5	5	5	5	5	5	5	4	4	5	4	4	5	5	5	5	5	5	5	5	5	5	4	5	4	5	4	5	5	4.66667	5	5	4.33333	4.33333	4.66667
1527	5	5	5	5	5	5	5	5	5	4	4	5	4	4	5	5	5	5	5	5	5	5	5	5	4	5	4	5	5	5	5	4.66667	5	5	4.33333	4.33333	5
1528	5	5	5	5	5	5	5	5	5	4	4	5	4	4	5	5	5	5	5	5	5	5	5	5	5	5	4	5	5	5	5	4.66667	5	5	4.33333	4.66667	5
1529	5	5	5	5	5	5	5	5	5	4	4	5	4	4	5	5	5	5	5	5	5	5	5	5	5	5	5	5	5	5	5	4.66667	5	5	4.33333	5	5
1530	5	5	5	5	5	5	5	5	5	4	4	5	4	5	5	5	5	5	5	5	5	5	5	5	5	5	5	5	5	5	5	4.66667	5	5	4.66667	5	5
1531	5	5	5	5	5	5	5	5	5	4	3	5	4	5	5	5	5	5	5	5	5	5	5	5	5	5	5	5	5	5	5	4.5	5	5	4.66667	5	5
1532	5	5	5	5	5	5	5	5	5	4	4	5	5	5	5	5	4	4	5	5	5	5	5	5	5	5	5	5	5	5	5	4.66667	4.6	5	5	5	5
1533	5	5	5	5	5	5	5	5	5	4	4	5	5	5	5	5	4	4	5	5	5	5	5	5	5	5	5	5	5	5	5	4.66667	4.6	5	5	5	5
1534	5	5	5	5	5	5	5	5	5	5	5	5	5	5	5	5	4	4	5	5	5	5	5	5	5	5	5	5	5	5	5	5	4.6	5	5	5	5
1535	5	5	5	5	5	5	5	5	5	5	5	5	5	5	5	5	4	3	5	5	5	5	5	5	5	5	5	5	5	5	5	5	4.4	5	5	5	5
1536	5	5	5	5	5	5	5	5	5	5	5	5	5	5	5	5	4	4	5	5	5	5	5	5	5	5	5	5	5	5	5	5	4.6	5	5	5	5
1537	5	5	5	5	5	5	5	5	5	5	5	5	5	5	5	5	4	4	5	5	5	5	5	5	5	5	5	5	5	5	5	5	4.6	5	5	5	5
1538	5	5	5	5	5	5	5	5	5	5	5	5	5	5	5	5	5	5	5	5	5	5	5	5	5	5	5	5	5	5	5	5	5	5	5	5	5
1539	5	5	5	5	5	5	5	5	5	5	5	5	5	5	5	5	4	4	5	5	5	5	5	5	5	5	5	5	5	5	5	5	4.6	5	5	5	5
1540	5	5	5	5	5	5	5	5	5	5	5	5	5	5	5	5	4	5	5	5	5	5	5	5	5	5	5	5	5	5	5	5	4.8	5	5	5	5
1541	5	5	5	5	5	5	5	5	5	5	5	5	5	5	5	5	3	5	5	5	5	5	5	5	5	5	5	5	5	5	5	5	4.6	5	5	5	5
1542	5	5	5	5	5	5	5	5	5	5	5	5	5	5	5	5	4	5	5	5	5	5	5	5	5	5	5	5	5	4	5	5	4.8	5	5	5	4.66667
1543	5	5	5	5	5	5	5	5	5	5	5	5	5	5	5	5	4	5	5	5	5	5	5	5	5	5	5	5	5	4	5	5	4.8	5	5	5	4.66667
1544	5	5	5	5	5	5	5	5	5	5	5	5	5	5	5	5	4	5	5	5	5	5	5	5	5	5	5	5	5	4	5	5	4.8	5	5	5	4.66667
1545	5	5	5	5	5	5	5	4	5	5	5	5	5	5	5	5	3	5	5	5	5	5	5	5	5	5	5	5	5	4	5	4.83333	4.6	5	5	5	4.66667
1546	5	5	5	5	5	5	5	4	5	5	5	5	4	5	5	5	5	5	5	5	5	5	5	5	5	5	5	5	5	4	5	4.83333	5	5	4.66667	5	4.66667
1547	4	4	5	5	3	4	5	4	5	5	5	5	4	5	5	5	4	5	5	5	5	5	5	5	5	5	4	5	5	4	4.16667	4.83333	4.8	5	4.66667	4.66667	4.66667
1548	5	4	5	5	5	4	5	4	5	5	5	5	5	5	5	5	4	5	5	5	5	5	5	5	5	5	4	5	5	3	4.66667	4.83333	4.8	5	5	4.66667	4.33333
1549	5	5	5	5	5	5	5	4	5	5	5	5	4	5	5	5	4	5	5	5	5	5	5	5	5	5	2	5	5	4	5	4.83333	4.8	5	4.66667	4	4.66667
1550	5	5	5	5	5	5	5	4	5	5	5	5	4	5	5	5	4	5	5	5	2	5	5	5	5	5	4	5	5	4	5	4.83333	4.8	4.25	4.66667	4.66667	4.66667
1551	5	5	5	5	5	5	5	4	5	4	4	5	4	5	5	5	3	5	4	5	1	5	5	5	5	5	5	5	5	5	5	4.5	4.4	4	4.66667	5	5
1552	5	5	5	5	5	5	5	4	5	4	4	5	4	5	5	5	4	5	4	5	2	5	5	5	5	5	4	5	5	3	5	4.5	4.6	4.25	4.66667	4.66667	4.33333
1553	5	5	5	5	5	5	5	4	5	4	4	5	4	5	5	5	5	5	4	5	1	5	5	5	5	5	4	5	5	4	5	4.5	4.8	4	4.66667	4.66667	4.66667
1554	4	3	5	5	4	3	5	5	5	5	5	5	4	5	5	5	5	5	4	5	2	5	5	5	5	5	4	5	5	2	4	5	4.8	4.25	4.66667	4.66667	4
1555	5	4	5	5	5	4	5	5	5	5	5	5	4	5	5	5	5	5	4	5	5	5	5	5	5	5	3	5	5	4	4.66667	5	4.8	5	4.66667	4.33333	4.66667
1556	4	4	5	5	4	4	5	5	5	5	5	5	4	5	5	5	5	5	5	5	5	5	5	5	5	5	4	5	5	3	4.33333	5	5	5	4.66667	4.66667	4.33333
1557	4	3	5	5	4	4	5	5	5	5	5	5	4	5	5	5	4	5	5	5	5	5	5	5	5	5	4	5	5	2	4.16667	5	4.8	5	4.66667	4.66667	4
1558	5	5	5	5	5	5	5	5	5	5	5	5	5	5	5	5	5	5	5	5	5	5	5	5	5	5	4	5	5	5	5	5	5	5	5	4.66667	5
1559	5	5	5	5	5	5	5	5	5	5	5	5	5	5	5	5	4	5	5	5	5	5	5	5	5	5	5	5	5	5	5	5	4.8	5	5	5	5
1560	5	5	5	5	5	5	5	5	5	5	5	5	5	5	5	5	4	5	5	5	5	5	5	5	5	5	3	5	5	5	5	5	4.8	5	5	4.33333	5
1561	5	5	5	5	5	5	5	5	5	5	5	5	5	5	5	5	5	5	5	5	5	5	5	5	5	5	3	5	5	5	5	5	5	5	5	4.33333	5
1562	5	5	5	5	5	5	5	5	5	5	5	5	5	5	5	5	4	5	5	5	5	5	4	5	5	5	4	5	5	5	5	5	4.8	4.75	5	4.66667	5
1563	5	5	5	5	5	5	5	5	5	5	5	5	5	5	5	5	5	5	5	5	5	4	5	5	5	5	5	5	5	5	5	5	5	4.75	5	5	5
1564	5	5	5	5	5	5	5	5	5	5	5	5	5	5	5	5	4	5	5	5	5	5	5	5	5	5	4	5	5	5	5	5	4.8	5	5	4.66667	5
1565	5	5	5	5	5	5	5	5	5	5	5	5	5	5	5	5	4	5	5	5	5	5	5	5	5	5	3	5	5	5	5	5	4.8	5	5	4.33333	5
1566	5	5	5	5	5	5	5	5	5	5	5	5	5	5	5	5	4	5	5	5	5	5	5	5	5	5	5	5	5	5	5	5	4.8	5	5	5	5
1567	5	5	5	5	5	5	5	5	5	5	5	5	5	5	5	5	5	5	5	3	5	5	5	5	5	5	4	5	5	5	5	5	4.6	5	5	4.66667	5
1568	5	5	5	5	5	5	5	5	5	5	5	5	5	5	5	5	4	5	5	4	5	5	5	5	5	5	3	5	5	5	5	5	4.6	5	5	4.33333	5
1569	5	5	5	5	5	5	5	5	5	5	5	5	5	5	5	5	4	5	5	4	5	5	5	5	5	5	4	5	5	5	5	5	4.6	5	5	4.66667	5
1570	5	5	5	5	5	5	5	5	5	5	5	4	5	5	5	5	5	5	5	4	5	5	5	5	5	5	4	5	5	5	5	4.83333	4.8	5	5	4.66667	5
1571	5	5	5	5	5	5	5	5	5	5	5	5	5	5	5	5	5	5	5	5	5	5	5	5	5	5	5	5	5	5	5	5	5	5	5	5	5
1572	5	5	5	5	5	5	5	5	5	5	5	3	5	5	4	5	5	5	5	3	5	5	5	5	5	5	3	5	5	5	5	4.66667	4.6	5	4.66667	4.33333	5
1573	5	5	5	5	5	4	5	5	5	5	5	3	5	5	3	5	5	5	5	3	2	5	5	5	5	5	4	5	5	5	4.83333	4.66667	4.6	4.25	4.33333	4.66667	5
1574	5	5	5	5	5	4	5	5	5	5	5	5	5	5	4	5	5	5	5	4	3	5	5	5	5	5	5	5	5	5	4.83333	5	4.8	4.5	4.66667	5	5
1575	5	5	5	5	5	4	5	5	5	5	5	4	5	5	4	5	5	5	5	4	1	5	5	5	5	5	4	5	5	5	4.83333	4.83333	4.8	4	4.66667	4.66667	5
1576	5	5	5	5	5	4	5	5	5	5	5	4	5	5	5	5	5	5	5	4	3	5	5	5	5	5	4	5	5	5	4.83333	4.83333	4.8	4.5	5	4.66667	5
1577	5	5	3	5	5	4	5	5	5	5	5	4	5	5	4	5	5	5	5	5	1	5	5	5	5	5	4	5	5	5	4.5	4.83333	5	4	4.66667	4.66667	5
1578	5	5	5	5	5	4	5	5	5	5	5	5	5	5	5	5	5	5	5	4	4	5	5	5	5	5	5	5	5	5	4.83333	5	4.8	4.75	5	5	5
1579	5	5	5	5	5	4	5	5	5	5	5	4	5	5	5	5	5	5	5	4	1	5	5	5	5	5	3	5	5	5	4.83333	4.83333	4.8	4	5	4.33333	5
1580	5	5	5	5	5	4	5	5	5	5	5	4	5	5	5	5	5	5	5	5	1	5	5	5	5	5	4	5	5	5	4.83333	4.83333	5	4	5	4.66667	5
1581	5	5	5	5	3	4	5	5	5	5	5	5	5	5	5	5	5	5	5	4	1	5	5	5	5	5	4	5	5	5	4.5	5	4.8	4	5	4.66667	5
1582	5	5	5	5	5	4	5	5	5	5	5	4	5	5	5	5	5	5	5	4	2	5	5	5	5	5	4	5	5	5	4.83333	4.83333	4.8	4.25	5	4.66667	5
1583	5	5	5	5	5	4	5	5	5	5	5	5	5	5	5	5	5	5	5	4	2	5	5	5	5	5	5	5	5	4	4.83333	5	4.8	4.25	5	5	4.66667
1584	5	5	5	5	5	5	5	5	5	5	5	5	5	5	5	5	5	5	5	5	2	5	5	5	5	5	5	5	5	4	5	5	5	4.25	5	5	4.66667
1585	5	5	5	5	5	5	5	5	5	5	5	5	5	5	5	5	5	5	5	5	3	5	5	5	5	5	5	5	5	3	5	5	5	4.5	5	5	4.33333
1586	5	5	5	5	5	5	5	5	5	5	5	5	5	5	5	5	5	5	5	5	2	5	5	5	5	5	5	5	5	3	5	5	5	4.25	5	5	4.33333
1587	5	5	5	5	5	5	5	5	5	5	5	5	5	5	5	5	4	5	5	5	1	5	5	5	5	5	5	5	5	4	5	5	4.8	4	5	5	4.66667
1588	5	5	5	5	5	5	5	5	5	5	5	5	5	5	5	5	5	5	5	5	5	5	5	5	5	5	5	5	5	4	5	5	5	5	5	5	4.66667
1589	5	5	5	5	5	5	5	5	5	5	5	5	5	5	5	5	4	5	5	5	5	5	5	5	5	5	5	5	5	3	5	5	4.8	5	5	5	4.33333
1590	5	5	5	5	5	5	5	5	5	5	5	5	5	5	5	5	4	5	5	5	5	5	1	1	5	5	5	5	5	3	5	5	4.8	3	5	5	4.33333
1591	5	5	5	5	5	5	5	5	5	5	5	5	5	4	5	5	2	5	5	5	5	5	2	4	5	5	5	5	5	4	5	5	4.4	4	4.66667	5	4.66667
1592	5	5	3	5	5	5	5	5	5	5	5	5	5	5	3	5	3	5	5	5	5	5	4	3	5	5	5	3	5	4	4.66667	5	4.6	4.25	4.33333	5	4
1593	5	5	5	5	5	5	4	4	4	4	4	5	5	5	4	5	4	5	5	5	5	5	4	4	5	5	5	2	5	4	5	4.16667	4.8	4.5	4.66667	5	3.66667
1594	5	5	5	5	5	5	5	5	5	5	4	5	5	5	5	5	4	5	5	5	5	5	4	4	5	5	5	5	5	5	5	4.83333	4.8	4.5	5	5	5
1595	5	5	5	5	5	5	4	4	4	4	4	5	5	5	4	5	4	5	5	4	5	5	2	2	5	5	5	4	5	2	5	4.16667	4.6	3.5	4.66667	5	3.66667
1596	5	5	5	5	5	5	2	4	4	3	4	5	5	5	3	5	4	5	5	4	5	5	3	3	5	5	5	4	5	4	5	3.66667	4.6	4	4.33333	5	4.33333
1597	5	5	5	5	5	5	5	4	4	4	4	5	5	5	5	5	5	5	5	5	5	5	5	4	5	5	5	3	5	4	5	4.33333	5	4.75	5	5	4
1598	5	5	5	5	5	5	5	5	5	4	4	5	5	5	4	5	2	5	5	4	5	5	4	1	5	5	5	4	5	4	5	4.66667	4.2	3.75	4.66667	5	4.33333
1599	5	5	5	5	5	5	5	5	5	5	4	5	5	5	5	5	4	5	5	4	5	5	1	1	5	5	5	3	5	4	5	4.83333	4.6	3	5	5	4
1600	5	5	5	5	5	5	5	5	5	3	3	5	5	5	5	5	5	5	5	5	5	5	2	3	5	5	5	3	5	3	5	4.33333	5	3.75	5	5	3.66667
1601	5	5	5	5	5	5	5	5	5	5	4	5	5	5	4	5	4	5	5	4	5	5	4	4	5	5	5	1	5	4	5	4.83333	4.6	4.5	4.66667	5	3.33333
1602	5	5	5	5	5	4	5	5	5	4	5	5	5	5	5	5	5	5	5	5	5	5	5	4	5	5	5	4	5	4	4.83333	4.83333	5	4.75	5	5	4.33333
1603	5	4	4	5	4	3	5	5	5	3	5	5	5	5	3	5	3	5	5	3	5	5	2	2	5	5	5	4	5	3	4.16667	4.66667	4.2	3.5	4.33333	5	4
1604	5	5	4	5	5	4	5	5	5	4	5	5	5	5	5	5	3	5	5	4	4	5	3	1	5	5	5	5	5	5	4.66667	4.83333	4.4	3.25	5	5	5
1605	5	2	4	5	5	5	5	5	5	5	5	5	5	5	5	5	5	5	5	5	5	4	1	1	5	5	5	3	5	4	4.33333	5	5	2.75	5	5	4
1606	5	2	2	5	4	4	5	5	5	4	4	5	5	5	5	5	5	5	5	4	5	5	2	1	5	5	5	3	5	2	3.66667	4.66667	4.8	3.25	5	5	3.33333
1607	5	5	5	5	5	5	5	5	5	4	4	5	5	5	5	5	2	5	5	2	5	5	1	1	5	5	5	4	5	2	5	4.66667	3.8	3	5	5	3.66667
1608	5	5	5	5	5	5	5	5	5	5	4	4	5	5	5	5	2	5	5	3	5	5	2	2	5	5	5	2	5	2	5	4.66667	4	3.5	5	5	3
1609	5	5	5	5	5	5	5	5	5	2	1	4	5	5	5	5	4	5	5	4	5	5	4	4	5	5	5	5	5	4	5	3.66667	4.6	4.5	5	5	4.66667
1610	5	5	5	5	5	5	5	5	5	4	5	4	5	5	5	5	5	5	5	4	5	5	2	2	5	5	5	2	5	2	5	4.66667	4.8	3.5	5	5	3
1611	5	5	5	5	5	5	5	5	5	4	3	5	5	5	5	5	5	5	5	3	5	5	4	3	5	5	5	4	5	4	5	4.5	4.6	4.25	5	5	4.33333
1612	5	5	5	5	5	5	4	5	5	2	4	4	5	5	5	5	2	5	5	1	5	5	1	1	5	5	5	4	5	4	5	4	3.6	3	5	5	4.33333
1613	5	5	5	5	5	5	1	5	5	1	1	1	5	5	5	5	5	5	5	5	5	5	5	4	5	5	5	3	5	2	5	2.33333	5	4.75	5	5	3.33333
1614	5	5	5	5	5	5	3	5	5	4	5	4	5	5	5	5	4	5	5	4	5	5	2	1	5	5	5	3	5	4	5	4.33333	4.6	3.25	5	5	4
1615	5	5	5	5	5	5	5	5	5	5	5	5	5	5	5	5	1	5	5	5	5	5	1	1	5	5	5	1	5	3	5	5	4.2	3	5	5	3
1616	5	5	5	5	5	5	5	5	5	5	5	5	5	5	5	5	4	5	5	3	5	5	3	3	5	5	5	1	5	3	5	5	4.4	4	5	5	3
1617	5	5	5	5	5	5	5	5	5	5	5	5	5	5	5	5	4	3	5	3	5	5	1	2	5	5	5	4	5	4	5	5	4	3.25	5	5	4.33333
1618	5	5	5	5	5	5	5	5	5	5	5	5	4	5	5	2	2	2	5	2	5	5	2	2	5	5	5	4	5	4	5	5	2.6	3.5	4.66667	5	4.33333
1619	5	5	5	5	5	5	5	5	5	5	5	5	5	5	5	5	5	4	5	5	5	5	1	4	5	5	5	5	5	3	5	5	4.8	3.75	5	5	4.33333
1620	5	5	5	5	5	5	5	5	5	5	5	5	2	2	1	4	4	4	5	4	5	5	4	2	5	5	5	4	5	4	5	5	4.2	4	1.66667	5	4.33333
1621	5	5	5	5	5	5	5	5	5	5	5	5	4	2	2	2	2	2	5	2	5	5	2	2	5	5	5	1	5	2	5	5	2.6	3.5	2.66667	5	2.66667
1622	5	5	5	5	5	5	5	5	5	5	5	5	5	5	5	2	2	2	5	3	5	5	5	5	5	5	5	5	5	5	5	5	2.8	5	5	5	5
1623	5	5	5	5	5	5	5	5	5	5	5	5	4	5	3	4	5	4	5	5	5	5	3	5	5	5	5	4	5	5	5	5	4.6	4.5	4	5	4.66667
1624	5	4	3	5	3	3	5	5	5	5	5	5	3	2	3	2	3	3	5	2	5	5	3	4	5	5	5	3	5	5	3.83333	5	3	4.25	2.66667	5	4.33333
1625	5	5	3	5	5	4	5	5	5	5	5	5	5	5	5	4	5	4	5	4	5	5	5	5	5	5	5	2	5	5	4.5	5	4.4	5	5	5	4
1626	5	4	3	5	5	5	5	5	5	5	5	5	2	2	3	3	4	4	5	3	5	5	4	1	5	5	5	1	5	5	4.5	5	3.8	3.75	2.33333	5	3.66667
1627	5	4	4	5	4	4	5	5	5	5	5	5	3	2	2	4	4	4	5	4	5	5	4	4	5	5	5	2	5	5	4.33333	5	4.2	4.5	2.33333	5	4
1628	5	3	2	5	5	4	5	5	5	5	5	5	4	5	3	4	5	3	5	3	5	5	2	3	5	5	5	3	5	5	4	5	4	3.75	4	5	4.33333
1629	5	5	5	5	5	5	5	5	5	5	5	5	4	4	4	4	4	4	5	4	5	5	5	5	5	5	5	4	5	5	5	5	4.2	5	4	5	4.66667
1630	5	5	5	5	5	5	5	5	5	5	5	5	4	4	4	4	4	4	5	5	5	5	5	5	5	5	5	3	5	5	5	5	4.4	5	4	5	4.33333
1631	5	5	5	5	5	5	5	5	5	5	5	5	4	4	4	3	4	4	5	5	4	4	5	5	5	5	5	4	5	5	5	5	4.2	4.5	4	5	4.66667
1632	5	5	5	5	5	5	5	5	5	5	5	5	4	4	4	4	4	4	5	5	5	5	5	5	5	5	5	3	5	5	5	5	4.4	5	4	5	4.33333
1633	5	5	5	5	5	5	5	5	5	5	5	5	4	4	4	4	4	3	5	5	5	4	4	5	5	5	5	4	5	5	5	5	4.2	4.5	4	5	4.66667
1634	5	5	5	5	5	5	5	5	5	5	5	5	5	5	5	5	5	5	5	4	5	5	5	5	5	5	5	5	5	5	5	5	4.8	5	5	5	5
1635	5	5	5	5	5	5	5	5	5	5	5	5	4	4	4	4	4	4	5	5	5	5	5	5	5	5	5	5	5	5	5	5	4.4	5	4	5	5
1636	5	5	5	5	5	5	5	5	5	5	5	5	4	4	4	4	4	4	5	5	5	5	5	5	5	5	5	5	5	5	5	5	4.4	5	4	5	5
1637	5	5	5	3	5	3	5	5	5	5	5	5	5	4	5	3	5	5	5	5	5	5	5	5	5	5	5	5	5	5	4.33333	5	4.6	5	4.66667	5	5
1638	2	5	5	5	5	5	5	5	2	5	5	5	4	4	5	4	5	5	5	5	5	4	4	5	5	3	4	5	5	5	4.5	4.5	4.8	4.5	4.33333	4	5
1639	5	5	4	5	3	5	5	3	5	5	5	5	3	5	5	4	5	5	5	5	4	5	5	5	5	5	4	5	5	5	4.5	4.66667	4.8	4.75	4.33333	4.66667	5
1640	5	3	5	5	3	5	4	5	5	5	5	5	5	5	4	4	5	5	5	5	5	5	5	5	5	4	5	5	5	5	4.33333	4.83333	4.8	5	4.66667	4.66667	5
1641	3	5	5	5	5	5	5	5	5	5	5	5	5	5	5	5	5	3	5	5	5	4	5	5	5	5	5	5	5	5	4.66667	5	4.6	4.75	5	5	5
1642	5	2	2	5	3	2	5	5	5	5	5	4	5	5	4	3	5	5	5	5	5	5	5	5	5	5	5	5	5	5	3.16667	4.83333	4.6	5	4.66667	5	5
1643	5	5	5	5	3	5	5	5	5	5	5	4	5	5	5	5	5	5	5	5	5	5	5	5	5	5	5	5	5	5	4.66667	4.83333	5	5	5	5	5
1644	5	5	5	5	5	5	5	5	5	5	5	4	3	5	5	5	5	5	5	5	5	5	5	5	5	5	5	5	4	5	5	4.83333	5	5	4.33333	5	4.66667
1645	5	5	5	5	3	5	5	5	5	5	5	4	5	5	5	5	5	5	5	5	4	5	5	5	5	5	5	5	4	5	4.66667	4.83333	5	4.75	5	5	4.66667
1646	5	5	5	4	3	5	5	5	5	5	5	4	5	4	5	5	4	5	5	5	5	5	5	5	5	5	5	5	4	5	4.5	4.83333	4.8	5	4.66667	5	4.66667
1647	5	5	5	5	4	5	5	5	5	5	5	5	5	5	5	5	5	5	5	5	5	5	5	5	5	5	5	5	5	5	4.83333	5	5	5	5	5	5
1648	2	5	5	5	5	5	5	5	5	5	5	4	5	5	4	5	5	5	5	5	5	5	5	5	5	5	5	5	4	4	4.5	4.83333	5	5	4.66667	5	4.33333
1649	5	5	5	5	5	5	5	5	5	5	5	4	5	4	5	5	5	5	5	5	5	5	5	5	5	5	5	5	5	4	5	4.83333	5	5	4.66667	5	4.66667
1650	5	4	4	5	4	5	5	5	5	5	5	4	5	5	5	5	5	5	5	5	5	5	5	5	5	5	5	5	4	5	4.5	4.83333	5	5	5	5	4.66667
1651	4	3	3	5	3	4	5	5	4	4	4	4	4	5	3	5	5	5	5	5	5	5	5	5	5	5	5	5	2	4	3.66667	4.33333	5	5	4	5	3.66667
1652	5	3	4	5	4	4	4	3	4	4	4	4	4	5	5	5	2	2	5	5	1	5	5	5	5	5	4	5	3	5	4.16667	3.83333	3.8	4	4.66667	4.66667	4.33333
1653	5	5	5	5	5	5	4	5	5	4	5	4	4	5	5	5	4	4	4	4	4	4	5	5	5	5	5	5	4	4	5	4.5	4.2	4.5	4.66667	5	4.33333
1654	5	5	5	5	5	5	4	5	5	4	5	4	4	5	5	4	4	4	4	4	4	4	5	5	5	5	5	5	4	4	5	4.5	4	4.5	4.66667	5	4.33333
1655	5	5	5	5	5	5	4	5	5	4	5	4	4	5	5	4	4	4	4	4	5	4	5	5	5	5	5	5	4	4	5	4.5	4	4.75	4.66667	5	4.33333
1656	5	5	5	5	5	5	4	5	5	4	5	4	4	5	5	5	4	5	4	4	5	4	5	5	5	5	5	5	5	5	5	4.5	4.4	4.75	4.66667	5	5
1657	5	5	5	5	5	5	4	5	5	4	5	4	5	5	5	5	5	5	4	4	5	5	5	5	5	5	5	5	5	5	5	4.5	4.6	5	5	5	5
1658	5	5	5	5	5	5	4	5	5	4	5	4	5	5	5	5	5	5	4	4	5	5	5	5	5	5	5	5	5	5	5	4.5	4.6	5	5	5	5
1659	5	5	5	5	5	5	4	5	5	4	5	4	5	5	5	5	5	5	4	4	5	5	5	5	5	5	5	5	5	5	5	4.5	4.6	5	5	5	5
1660	5	5	5	5	5	5	4	5	5	4	5	4	5	5	5	5	5	5	5	5	5	5	5	5	5	5	5	5	3	5	5	4.5	5	5	5	5	4.33333
1661	5	5	5	5	5	5	4	5	5	4	5	4	5	5	5	5	5	5	5	5	5	5	5	5	5	5	5	5	5	5	5	4.5	5	5	5	5	5
1662	5	5	5	3	5	5	4	5	5	4	5	4	5	5	5	5	5	5	5	5	5	5	5	5	5	5	5	5	5	5	4.66667	4.5	5	5	5	5	5
1663	5	5	5	5	5	5	4	5	5	4	5	5	5	5	5	5	5	5	5	5	5	5	5	5	5	5	5	5	5	5	5	4.66667	5	5	5	5	5
1664	4	3	3	5	4	4	5	5	5	5	5	4	5	5	5	5	5	5	5	5	5	5	5	5	5	5	5	5	5	5	3.83333	4.83333	5	5	5	5	5
1665	5	5	5	5	5	5	5	5	5	5	5	4	5	5	5	5	5	5	5	5	5	5	5	5	5	5	5	5	5	5	5	4.83333	5	5	5	5	5
1666	5	5	5	5	5	5	5	5	5	5	5	5	5	5	5	5	5	5	5	5	5	5	5	5	5	5	5	5	5	5	5	5	5	5	5	5	5
1667	5	5	5	5	5	5	5	5	5	5	5	4	5	5	5	5	5	5	5	5	5	5	5	5	5	5	5	5	5	5	5	4.83333	5	5	5	5	5
1668	5	5	5	5	5	5	5	5	5	5	5	4	5	5	5	5	5	5	5	5	5	5	5	5	5	5	5	5	5	5	5	4.83333	5	5	5	5	5
1669	5	5	5	5	5	5	5	5	5	5	5	4	5	5	5	5	5	5	5	5	5	5	5	5	5	5	5	5	5	5	5	4.83333	5	5	5	5	5
1670	3	3	4	2	5	4	5	5	5	5	5	4	5	5	5	4	5	5	5	5	5	5	5	5	5	5	5	5	5	5	3.5	4.83333	4.8	5	5	5	5
1671	5	5	5	5	5	5	5	5	5	5	5	4	5	5	5	4	5	5	5	5	5	5	5	5	5	5	4	5	5	5	5	4.83333	4.8	5	5	4.66667	5
1672	5	5	5	5	5	5	5	5	5	5	5	5	5	5	5	4	5	5	5	5	5	5	5	5	5	5	4	5	5	5	5	5	4.8	5	5	4.66667	5
1673	4	3	4	5	5	4	5	5	5	5	5	4	4	5	5	4	5	5	5	5	5	5	5	5	5	5	4	5	5	5	4.16667	4.83333	4.8	5	4.66667	4.66667	5
1674	5	5	5	5	5	4	5	5	5	5	5	4	4	5	5	4	5	5	5	5	5	5	5	5	5	5	5	5	5	5	4.83333	4.83333	4.8	5	4.66667	5	5
1675	4	4	4	5	5	4	5	5	5	5	5	5	4	5	5	4	5	5	5	5	5	5	5	5	5	5	4	5	5	5	4.33333	5	4.8	5	4.66667	4.66667	5
1676	5	5	5	5	5	5	5	5	5	5	5	5	5	5	5	4	5	5	5	5	5	5	5	5	5	5	4	5	5	5	5	5	4.8	5	5	4.66667	5
1677	4	3	3	5	5	5	5	5	5	5	5	5	5	5	5	5	5	5	5	5	5	5	5	5	5	5	5	5	5	5	4.16667	5	5	5	5	5	5
1678	5	5	5	5	5	5	5	5	5	5	5	5	5	5	5	5	5	5	5	5	5	5	5	5	5	5	5	5	5	5	5	5	5	5	5	5	5
1679	5	5	4	5	5	4	5	5	5	5	5	5	5	5	5	5	5	5	5	5	5	5	5	5	5	5	5	5	5	5	4.66667	5	5	5	5	5	5
1680	5	5	5	5	5	4	5	5	5	5	5	5	5	5	5	5	5	5	5	5	5	5	5	5	5	5	5	5	5	5	4.83333	5	5	5	5	5	5
1681	5	5	5	5	5	4	5	5	5	5	5	5	5	5	5	5	5	5	5	5	5	5	5	5	5	5	5	5	5	5	4.83333	5	5	5	5	5	5
1682	5	5	5	5	5	4	5	5	5	5	5	5	5	5	5	5	5	5	5	5	5	5	5	5	5	5	5	5	5	5	4.83333	5	5	5	5	5	5
1683	4	3	3	5	5	4	5	5	5	5	5	5	5	5	5	5	5	5	5	5	5	5	5	5	5	5	5	5	4	5	4	5	5	5	5	5	4.66667
1684	5	4	4	5	5	4	5	5	5	5	5	5	5	5	5	5	5	5	5	5	5	5	5	5	5	5	5	5	4	5	4.5	5	5	5	5	5	4.66667
1685	2	3	3	5	5	3	5	5	5	5	5	5	5	5	5	5	4	5	5	5	5	5	5	5	5	5	5	5	3	5	3.5	5	4.8	5	5	5	4.33333
1686	5	5	5	5	5	5	5	5	5	5	5	5	5	5	5	5	4	5	5	5	5	5	5	5	5	5	5	5	4	5	5	5	4.8	5	5	5	4.66667
1687	4	5	5	5	5	4	5	5	5	5	5	5	5	5	5	5	5	5	5	5	5	5	5	5	5	5	5	5	5	5	4.66667	5	5	5	5	5	5
1688	4	3	4+H37:H112	5	5	5	5	5	5	5	5	5	5	5	5	5	5	5	5	5	5	5	5	5	5	5	5	5	3	5	4.4	5	5	5	5	5	4.33333
1689	3	3	4	5	5	4	5	5	5	5	5	5	5	5	5	5	5	5	5	5	5	5	5	5	5	5	5	5	3	5	4	5	5	5	5	5	4.33333
1690	4	3	4	5	5	4	5	5	5	5	5	5	5	5	5	5	4	5	5	5	5	5	5	5	5	5	5	5	1	5	4.16667	5	4.8	5	5	5	3.66667
1691	4	4	4	5	5	5	5	5	5	5	5	5	5	4	5	5	4	5	5	5	5	5	5	5	5	5	5	5	4	5	4.5	5	4.8	5	4.66667	5	4.66667
1692	5	5	5	5	5	4	5	5	5	5	5	5	5	5	5	5	5	5	5	5	5	5	5	5	5	5	5	5	5	5	4.83333	5	5	5	5	5	5
1693	5	4	4	5	5	5	5	5	5	5	5	5	5	4	4	5	4	5	5	5	5	5	5	5	5	5	5	5	3	5	4.66667	5	4.8	5	4.33333	5	4.33333
1694	4	3	3	5	5	4	5	5	5	5	5	5	5	4	5	5	4	5	5	5	5	5	5	5	5	5	5	5	4	5	4	5	4.8	5	4.66667	5	4.66667
1695	5	5	5	5	5	5	5	5	5	5	5	5	5	4	4	5	4	5	5	5	5	5	5	5	5	5	5	5	4	5	5	5	4.8	5	4.33333	5	4.66667
1696	5	5	5	5	5	5	5	5	5	5	5	4	5	5	4	5	3	5	5	5	5	5	5	5	5	5	5	5	4	5	5	4.83333	4.6	5	4.66667	5	4.66667
1697	5	5	5	5	5	5	5	5	5	5	5	5	5	5	5	5	5	5	5	5	5	5	5	5	5	5	5	5	3	5	5	5	5	5	5	5	4.33333
1698	5	5	5	5	5	5	5	5	5	5	5	4	5	5	4	5	5	5	5	5	5	5	5	5	5	5	5	5	4	5	5	4.83333	5	5	4.66667	5	4.66667
1699	5	5	5	5	5	5	5	5	5	5	5	5	5	5	5	5	5	5	5	5	5	5	5	5	5	5	5	5	4	5	5	5	5	5	5	5	4.66667
1700	5	5	5	5	5	5	5	5	5	5	5	4	5	5	5	5	2	5	5	5	5	5	5	5	5	5	5	5	2	5	5	4.83333	4.4	5	5	5	4
1701	5	5	5	5	5	5	5	5	5	5	5	4	5	5	5	5	5	5	5	5	5	5	5	5	5	5	5	5	5	5	5	4.83333	5	5	5	5	5
1702	5	5	5	5	5	5	5	5	5	5	5	4	5	5	5	5	5	5	5	5	5	5	5	5	5	5	5	5	5	5	5	4.83333	5	5	5	5	5
1703	5	5	5	5	5	5	5	5	5	5	5	5	5	5	5	5	3	5	5	5	5	5	5	5	5	5	5	5	5	5	5	5	4.6	5	5	5	5
1704	5	5	5	5	5	5	5	5	5	5	5	5	5	5	5	5	4	5	5	5	5	5	5	5	5	5	5	5	5	5	5	5	4.8	5	5	5	5
1705	5	5	5	5	5	5	5	5	5	5	5	4	5	5	5	5	5	4	5	5	5	5	5	5	5	5	5	5	5	5	5	4.83333	4.8	5	5	5	5
1706	5	5	5	5	5	5	5	5	5	5	5	4	5	5	5	5	4	4	5	5	5	5	5	5	5	5	5	5	5	5	5	4.83333	4.6	5	5	5	5
1707	5	5	5	5	5	5	5	5	5	5	5	5	5	5	5	5	5	4	5	5	5	5	5	5	5	5	5	5	5	5	5	5	4.8	5	5	5	5
1708	5	5	5	5	5	5	3	4	5	5	5	2	5	5	5	5	4	3	5	5	5	5	5	5	5	5	5	5	5	5	5	4	4.4	5	5	5	5
1709	5	5	5	5	5	5	5	4	5	5	5	4	5	5	5	5	4	4	5	5	5	5	5	5	5	5	5	5	5	5	5	4.66667	4.6	5	5	5	5
1710	5	5	5	5	5	5	5	5	5	5	5	5	5	5	5	5	5	5	5	5	5	5	5	5	5	5	5	5	5	5	5	5	5	5	5	5	5
1711	4	4	3	5	5	4	4	4	5	5	5	4	5	5	5	5	4	2	5	5	5	5	5	5	5	5	5	5	5	5	4.16667	4.5	4.2	5	5	5	5
1712	5	5	5	5	5	5	5	4	5	5	5	5	5	5	5	5	4	4	5	5	5	5	5	5	5	5	5	5	5	5	5	4.83333	4.6	5	5	5	5
1713	4	4	4	5	5	5	4	5	5	5	5	5	5	5	5	5	5	2	5	5	5	5	5	5	5	5	5	5	5	5	4.5	4.83333	4.4	5	5	5	5
1714	5	5	5	5	5	5	5	5	5	5	5	5	5	5	5	5	4	4	5	5	5	5	5	5	5	5	5	5	5	5	5	5	4.6	5	5	5	5
1715	5	5	5	5	5	5	5	5	5	5	5	5	5	5	5	5	5	4	5	5	5	5	5	5	5	5	5	5	5	5	5	5	4.8	5	5	5	5
1716	5	5	4	5	5	5	5	5	5	5	5	5	5	5	5	5	5	5	5	5	5	5	5	5	5	5	5	5	5	5	4.83333	5	5	5	5	5	5
1717	5	5	5	5	5	5	5	4	4	4	5	5	5	5	5	5	4	4	5	5	5	5	5	5	5	5	5	5	5	5	5	4.5	4.6	5	5	5	5
1718	5	5	5	5	5	5	2	2	4	4	5	5	5	5	4	5	4	4	5	5	5	5	5	5	5	5	5	5	5	5	5	3.66667	4.6	5	4.66667	5	5
1719	5	5	5	5	5	5	5	5	5	5	5	5	5	5	1	5	4	4	5	5	5	5	5	5	2	5	5	5	5	5	5	5	4.6	5	3.66667	4	5
1720	5	5	5	5	5	5	5	5	5	5	5	5	5	5	5	5	2	2	5	5	5	5	5	5	4	5	5	5	5	5	5	5	3.8	5	5	4.66667	5
1721	5	5	5	5	5	5	5	5	5	5	5	5	5	5	5	5	4	5	5	5	5	5	5	5	3	5	5	5	5	5	5	5	4.8	5	5	4.33333	5
1722	5	5	5	5	5	5	5	5	5	5	5	5	5	5	5	5	5	5	5	5	5	5	5	5	4	5	5	5	5	5	5	5	5	5	5	4.66667	5
1723	5	5	5	5	5	5	5	5	5	5	5	5	5	5	5	5	5	5	5	5	3	5	5	5	1	5	5	5	5	5	5	5	5	4.5	5	3.66667	5
1724	5	5	5	5	5	5	5	5	5	5	5	5	5	5	5	5	5	5	5	5	3	5	5	5	3	5	5	5	5	5	5	5	5	4.5	5	4.33333	5
1725	5	5	5	5	5	5	5	5	5	5	5	5	5	5	5	5	5	5	5	5	5	5	5	5	5	5	5	5	5	5	5	5	5	5	5	5	5
1726	5	5	5	5	5	5	5	5	5	5	5	5	5	5	5	5	5	5	5	5	4	5	5	5	2	5	5	5	5	5	5	5	5	4.75	5	4	5
1727	5	5	5	5	5	5	5	5	5	5	5	5	5	5	5	5	5	5	5	5	2	5	5	5	4	5	5	5	5	5	5	5	5	4.25	5	4.66667	5
1728	5	5	5	5	5	5	5	5	5	5	5	5	5	5	5	5	5	5	5	5	5	5	5	5	4	5	5	5	2	5	5	5	5	5	5	4.66667	4
1729	5	5	5	5	5	5	5	5	5	5	5	5	5	5	5	5	5	5	5	5	5	5	5	5	4	5	5	5	4	5	5	5	5	5	5	4.66667	4.66667
1730	5	5	5	5	5	5	5	5	5	5	5	5	5	5	5	5	5	5	5	5	5	5	5	5	5	5	5	5	4	5	5	5	5	5	5	5	4.66667
1731	5	5	5	5	5	5	5	5	5	5	5	5	5	5	5	5	5	5	5	5	5	5	5	5	4	5	5	5	4	5	5	5	5	5	5	4.66667	4.66667
1732	5	5	5	5	5	5	5	5	5	5	5	5	5	5	5	5	5	5	5	5	5	5	5	5	5	5	5	5	2	5	5	5	5	5	5	5	4
1733	5	5	5	5	5	5	5	5	5	5	5	5	5	5	5	5	5	5	5	5	5	5	5	5	5	5	5	5	3	5	5	5	5	5	5	5	4.33333
1734	5	5	5	5	5	5	5	5	5	5	5	5	5	5	5	5	5	5	5	5	5	5	5	5	5	5	5	5	2	5	5	5	5	5	5	5	4
1735	5	5	5	5	5	5	3	5	5	4	5	5	5	5	5	5	5	5	5	5	5	5	5	5	5	5	5	5	5	5	5	4.5	5	5	5	5	5
1736	5	5	5	5	5	5	5	5	5	5	5	5	5	4	4	5	5	5	5	5	5	5	5	5	5	5	5	5	5	5	5	5	5	5	4.33333	5	5
1737	5	5	5	5	5	5	4	5	5	3	5	5	5	5	4	5	5	5	5	5	5	5	5	5	5	5	5	5	5	5	5	4.5	5	5	4.66667	5	5
1738	5	5	5	5	5	5	5	5	5	4	5	5	5	4	4	5	5	5	5	5	5	5	5	5	5	5	5	5	5	5	5	4.83333	5	5	4.33333	5	5
1739	5	4	5	5	5	4	4	5	5	4	5	5	5	5	4	5	5	5	5	5	5	5	5	5	5	5	5	5	5	5	4.66667	4.66667	5	5	4.66667	5	5
1740	4	4	3	5	5	4	4	5	5	4	5	5	5	5	4	5	5	5	5	5	5	5	5	5	5	5	5	5	5	5	4.16667	4.66667	5	5	4.66667	5	5
1741	1	2	5	5	5	3	2	5	5	2	5	5	5	5	5	5	5	5	5	5	5	5	5	5	5	5	5	5	5	5	3.5	4	5	5	5	5	5
1742	1	2	5	5	5	1	5	5	5	5	5	5	5	5	5	5	5	5	5	5	5	5	5	5	5	5	5	5	5	5	3.16667	5	5	5	5	5	5
1743	5	5	5	5	5	5	5	5	5	5	5	5	5	5	5	5	5	5	5	5	5	5	5	5	5	5	5	5	5	5	5	5	5	5	5	5	5
1744	4	5	5	5	5	4	5	5	5	5	5	5	5	5	5	5	5	5	5	5	5	5	5	5	5	5	5	5	5	5	4.66667	5	5	5	5	5	5
1745	4	4	5	5	5	5	5	5	5	5	5	5	5	5	5	5	5	5	5	5	5	5	5	5	5	5	5	5	5	5	4.66667	5	5	5	5	5	5
1746	1	2	5	5	5	4	5	5	5	5	5	5	5	5	5	5	5	5	5	5	5	5	5	5	5	5	5	5	5	5	3.66667	5	5	5	5	5	5
1747	4	4	5	5	5	3	5	5	5	5	5	5	5	5	5	5	5	5	5	5	5	5	5	5	5	5	5	5	5	5	4.33333	5	5	5	5	5	5
1748	1	2	5	5	5	2	5	5	5	5	5	5	5	5	5	5	5	5	5	5	5	5	5	5	5	5	5	5	5	5	3.33333	5	5	5	5	5	5
1749	1	1	5	5	5	1	5	5	5	5	5	5	5	5	5	5	5	5	5	5	5	5	5	5	5	5	5	5	5	5	3	5	5	5	5	5	5
1750	4	4	5	5	5	5	5	5	5	5	5	5	5	5	5	5	5	5	5	5	5	5	5	5	5	5	5	5	5	5	4.66667	5	5	5	5	5	5
1751	1	2	5	5	5	1	5	5	5	5	5	5	5	5	5	5	5	5	5	5	5	5	5	5	5	5	5	5	5	5	3.16667	5	5	5	5	5	5
1752	1	2	5	5	5	1	5	5	5	5	5	5	5	5	5	5	5	5	5	5	5	5	5	5	5	5	5	5	5	5	3.16667	5	5	5	5	5	5
1753	4	2	5	5	5	2	5	5	5	5	5	5	5	5	5	5	5	5	5	5	5	5	5	5	5	5	5	5	5	5	3.83333	5	5	5	5	5	5
1754	5	5	5	5	5	5	5	5	5	5	5	5	5	5	5	5	5	5	5	5	5	5	5	5	4	5	5	5	5	5	5	5	5	5	5	4.66667	5
1755	5	5	5	5	5	5	5	5	5	5	5	5	5	5	5	5	5	5	5	5	5	5	5	5	5	5	5	5	1	5	5	5	5	5	5	5	3.66667
1756	5	5	5	5	5	5	5	5	5	4	2	4	5	5	5	5	5	5	5	5	5	5	5	5	4	5	5	5	2	5	5	4.16667	5	5	5	4.66667	4
1757	5	5	5	5	5	5	5	5	5	4	5	5	5	5	5	5	5	5	5	5	5	5	5	5	5	5	5	5	3	5	5	4.83333	5	5	5	5	4.33333
1758	5	5	5	5	5	5	5	5	5	4	4	4	5	4	5	5	5	5	5	5	5	5	5	5	4	5	5	5	4	5	5	4.5	5	5	4.66667	4.66667	4.66667
1759	5	5	5	5	5	5	5	5	5	4	4	4	5	4	5	5	5	5	5	5	5	5	5	5	4	5	5	5	4	5	5	4.5	5	5	4.66667	4.66667	4.66667
1760	5	5	5	5	5	5	5	5	5	4	4	4	4	4	5	5	5	5	5	5	5	5	5	5	4	5	5	5	4	5	5	4.5	5	5	4.33333	4.66667	4.66667
1761	5	5	5	5	5	5	5	5	5	4	4	5	4	4	5	5	5	5	5	5	5	5	5	5	4	5	4	5	4	5	5	4.66667	5	5	4.33333	4.33333	4.66667
1762	5	5	5	5	5	5	5	5	5	4	4	5	4	4	5	5	5	5	5	5	5	5	5	5	4	5	4	5	4	5	5	4.66667	5	5	4.33333	4.33333	4.66667
1763	5	5	5	5	5	5	5	5	5	4	4	5	4	4	5	5	5	5	5	5	5	5	5	5	4	5	4	5	5	5	5	4.66667	5	5	4.33333	4.33333	5
1764	5	5	5	5	5	5	5	5	5	4	4	5	4	4	5	5	5	5	5	5	5	5	5	5	5	5	4	5	5	5	5	4.66667	5	5	4.33333	4.66667	5
1765	5	5	5	5	5	5	5	5	5	4	4	5	4	4	5	5	5	5	5	5	5	5	5	5	5	5	5	5	5	5	5	4.66667	5	5	4.33333	5	5
1766	5	5	5	5	5	5	5	5	5	4	4	5	4	5	5	5	5	5	5	5	5	5	5	5	5	5	5	5	5	5	5	4.66667	5	5	4.66667	5	5
1767	5	5	5	5	5	5	5	5	5	4	3	5	4	5	5	5	5	5	5	5	5	5	5	5	5	5	5	5	5	5	5	4.5	5	5	4.66667	5	5
1768	5	5	5	5	5	5	5	5	5	4	4	5	5	5	5	5	4	4	5	5	5	5	5	5	5	5	5	5	5	5	5	4.66667	4.6	5	5	5	5
1769	5	5	5	5	5	5	5	5	5	4	4	5	5	5	5	5	4	4	5	5	5	5	5	5	5	5	5	5	5	5	5	4.66667	4.6	5	5	5	5
1770	5	5	5	5	5	5	5	5	5	5	5	5	5	5	5	5	4	4	5	5	5	5	5	5	5	5	5	5	5	5	5	5	4.6	5	5	5	5
1771	5	5	5	5	5	5	5	5	5	5	5	5	5	5	5	5	4	3	5	5	5	5	5	5	5	5	5	5	5	5	5	5	4.4	5	5	5	5
1772	5	5	5	5	5	5	5	5	5	5	5	5	5	5	5	5	4	4	5	5	5	5	5	5	5	5	5	5	5	5	5	5	4.6	5	5	5	5
1773	5	5	5	5	5	5	5	5	5	5	5	5	5	5	5	5	4	4	5	5	5	5	5	5	5	5	5	5	5	5	5	5	4.6	5	5	5	5
1774	5	5	5	5	5	5	5	5	5	5	5	5	5	5	5	5	5	5	5	5	5	5	5	5	5	5	5	5	5	5	5	5	5	5	5	5	5
1775	5	5	5	5	5	5	5	5	5	5	5	5	5	5	5	5	4	4	5	5	5	5	5	5	5	5	5	5	5	5	5	5	4.6	5	5	5	5
1776	5	5	5	5	5	5	5	5	5	5	5	5	5	5	5	5	4	5	5	5	5	5	5	5	5	5	5	5	5	5	5	5	4.8	5	5	5	5
1777	5	5	5	5	5	5	5	5	5	5	5	5	5	5	5	5	3	5	5	5	5	5	5	5	5	5	5	5	5	5	5	5	4.6	5	5	5	5
1778	5	5	5	5	5	5	5	5	5	5	5	5	5	5	5	5	4	5	5	5	5	5	5	5	5	5	5	5	5	4	5	5	4.8	5	5	5	4.66667
1779	5	5	5	5	5	5	5	5	5	5	5	5	5	5	5	5	4	5	5	5	5	5	5	5	5	5	5	5	5	4	5	5	4.8	5	5	5	4.66667
1780	5	5	5	5	5	5	5	5	5	5	5	5	5	5	5	5	4	5	5	5	5	5	5	5	5	5	5	5	5	4	5	5	4.8	5	5	5	4.66667
1781	5	5	5	5	5	5	5	4	5	5	5	5	5	5	5	5	3	5	5	5	5	5	5	5	5	5	5	5	5	4	5	4.83333	4.6	5	5	5	4.66667
1782	5	5	5	5	5	5	5	4	5	5	5	5	4	5	5	5	5	5	5	5	5	5	5	5	5	5	5	5	5	4	5	4.83333	5	5	4.66667	5	4.66667
1783	4	4	5	5	3	4	5	4	5	5	5	5	4	5	5	5	4	5	5	5	5	5	5	5	5	5	4	5	5	4	4.16667	4.83333	4.8	5	4.66667	4.66667	4.66667
1784	5	4	5	5	5	4	5	4	5	5	5	5	5	5	5	5	4	5	5	5	5	5	5	5	5	5	4	5	5	3	4.66667	4.83333	4.8	5	5	4.66667	4.33333
1785	5	5	5	5	5	5	5	4	5	5	5	5	4	5	5	5	4	5	5	5	5	5	5	5	5	5	2	5	5	4	5	4.83333	4.8	5	4.66667	4	4.66667
1786	5	5	5	5	5	5	5	4	5	5	5	5	4	5	5	5	4	5	5	5	2	5	5	5	5	5	4	5	5	4	5	4.83333	4.8	4.25	4.66667	4.66667	4.66667
1787	5	5	5	5	5	5	5	4	5	4	4	5	4	5	5	5	3	5	5	5	1	5	5	5	5	5	5	5	5	5	5	4.5	4.6	4	4.66667	5	5
1788	5	5	5	5	5	5	5	4	5	4	4	5	4	5	5	5	4	5	5	5	2	5	5	5	5	5	4	5	5	3	5	4.5	4.8	4.25	4.66667	4.66667	4.33333
1789	5	5	5	5	5	5	5	4	5	4	4	5	4	5	5	5	5	5	5	5	1	5	5	5	5	5	4	5	5	4	5	4.5	5	4	4.66667	4.66667	4.66667
1790	4	3	5	5	4	3	5	5	5	5	5	5	4	5	5	5	5	5	5	5	2	5	5	5	5	5	4	5	5	2	4	5	5	4.25	4.66667	4.66667	4
1791	5	4	5	5	5	4	5	5	5	5	5	5	4	5	5	5	5	5	5	5	5	5	5	5	5	5	3	5	5	4	4.66667	5	5	5	4.66667	4.33333	4.66667
1792	4	4	5	5	4	4	5	5	5	5	5	5	4	5	5	5	5	5	5	5	5	5	5	5	5	5	4	5	5	3	4.33333	5	5	5	4.66667	4.66667	4.33333
1793	4	3	5	5	4	4	5	5	5	5	5	5	4	5	5	5	4	5	5	5	5	5	5	5	5	5	4	5	5	2	4.16667	5	4.8	5	4.66667	4.66667	4
1794	5	5	5	5	5	5	5	5	5	5	5	5	5	5	5	5	5	5	5	5	5	5	5	5	5	5	4	5	5	5	5	5	5	5	5	4.66667	5
1795	5	5	5	5	5	5	5	5	5	5	5	5	5	5	5	5	4	5	5	5	5	5	5	5	5	5	5	5	5	5	5	5	4.8	5	5	5	5
1796	5	5	5	5	5	5	5	5	5	5	5	5	5	5	5	5	4	5	5	5	5	5	5	5	5	5	3	5	5	5	5	5	4.8	5	5	4.33333	5
1797	5	5	5	5	5	5	5	5	5	5	5	5	5	5	5	5	5	5	5	5	5	5	5	5	5	5	3	5	5	5	5	5	5	5	5	4.33333	5
1798	5	5	5	5	5	5	5	5	5	5	5	5	5	5	5	5	4	5	5	5	5	5	4	5	5	5	4	5	5	5	5	5	4.8	4.75	5	4.66667	5
1799	5	5	5	5	5	5	5	5	5	5	5	5	5	5	5	5	5	5	5	5	5	4	5	5	5	5	5	5	5	5	5	5	5	4.75	5	5	5
1800	5	5	5	5	5	5	5	5	5	5	5	5	5	5	5	5	4	5	5	5	5	5	5	5	5	5	4	5	5	5	5	5	4.8	5	5	4.66667	5
1801	5	5	5	5	5	5	5	5	5	5	5	5	5	5	5	5	4	5	5	5	5	5	5	5	5	5	3	5	5	5	5	5	4.8	5	5	4.33333	5
1802	5	5	5	5	5	5	5	5	5	5	5	5	5	5	5	5	4	5	5	5	5	5	5	5	5	5	5	5	5	5	5	5	4.8	5	5	5	5
1803	5	5	5	5	5	5	5	5	5	5	5	5	5	5	5	5	5	5	5	3	5	5	5	5	5	5	4	5	5	5	5	5	4.6	5	5	4.66667	5
1804	5	5	5	5	5	5	5	5	5	5	5	5	5	5	5	5	4	5	5	4	5	5	5	5	5	5	3	5	5	5	5	5	4.6	5	5	4.33333	5
1805	5	5	5	5	5	5	5	5	5	5	5	5	5	5	5	5	4	5	5	4	5	5	5	5	5	5	4	5	5	5	5	5	4.6	5	5	4.66667	5
1806	5	5	5	5	5	5	5	5	5	5	5	4	5	5	5	5	5	5	5	4	5	5	5	5	5	5	4	5	5	5	5	4.83333	4.8	5	5	4.66667	5
1807	5	5	5	5	5	5	5	5	5	5	5	5	5	5	5	5	5	5	5	5	5	5	5	5	5	5	5	5	5	5	5	5	5	5	5	5	5
1808	5	5	5	5	5	5	5	5	5	5	5	3	5	5	4	5	5	5	5	3	5	5	5	5	5	5	3	5	5	5	5	4.66667	4.6	5	4.66667	4.33333	5
1809	5	5	5	5	5	4	5	5	5	5	5	3	5	5	3	5	5	5	5	3	2	5	5	5	5	5	4	5	5	5	4.83333	4.66667	4.6	4.25	4.33333	4.66667	5
1810	5	5	5	5	5	4	5	5	5	5	5	5	5	5	4	5	5	5	5	4	3	5	5	5	5	5	5	5	5	5	4.83333	5	4.8	4.5	4.66667	5	5
1811	5	5	5	5	5	4	5	5	5	5	5	4	5	5	4	5	5	5	5	4	1	5	5	5	5	5	4	5	5	5	4.83333	4.83333	4.8	4	4.66667	4.66667	5
1812	5	5	5	5	5	4	5	5	5	5	5	4	5	5	5	5	5	5	5	4	3	5	5	5	5	5	4	5	5	5	4.83333	4.83333	4.8	4.5	5	4.66667	5
1813	5	5	3	5	5	4	5	5	5	5	5	4	5	5	4	5	5	5	5	5	1	5	5	5	5	5	4	5	5	5	4.5	4.83333	5	4	4.66667	4.66667	5
1814	5	5	5	5	5	4	5	5	5	5	5	5	5	5	5	5	5	5	5	4	4	5	5	5	5	5	5	5	5	5	4.83333	5	4.8	4.75	5	5	5
1815	5	5	5	5	5	4	5	5	5	5	5	4	5	5	5	5	5	5	5	4	1	5	5	5	5	5	3	5	5	5	4.83333	4.83333	4.8	4	5	4.33333	5
1816	5	5	5	5	5	4	5	5	5	5	5	4	5	5	5	5	5	5	5	5	1	5	5	5	5	5	4	5	5	5	4.83333	4.83333	5	4	5	4.66667	5
1817	5	5	5	5	3	4	5	5	5	5	5	5	5	5	5	5	5	5	5	4	1	5	5	5	5	5	4	5	5	5	4.5	5	4.8	4	5	4.66667	5
1818	5	5	5	5	5	4	5	5	5	5	5	4	5	5	5	5	5	5	5	4	2	5	5	5	5	5	4	5	5	5	4.83333	4.83333	4.8	4.25	5	4.66667	5
1819	5	5	5	5	5	4	5	5	5	5	5	5	5	5	5	5	5	5	5	4	2	5	5	5	5	5	5	5	5	4	4.83333	5	4.8	4.25	5	5	4.66667
1820	5	5	5	5	5	5	5	5	5	5	5	5	5	5	5	5	5	5	5	5	2	5	5	5	5	5	5	5	5	4	5	5	5	4.25	5	5	4.66667
1821	5	5	5	5	5	5	5	5	5	5	5	5	5	5	5	5	5	5	5	5	3	5	5	5	5	5	5	5	5	3	5	5	5	4.5	5	5	4.33333
1822	5	5	5	5	5	5	5	5	5	5	5	5	5	5	5	5	5	5	5	5	2	5	5	5	5	5	5	5	5	3	5	5	5	4.25	5	5	4.33333
1823	5	5	5	5	5	5	5	5	5	5	5	5	5	5	5	5	4	5	5	5	1	5	5	5	5	5	5	5	5	4	5	5	4.8	4	5	5	4.66667
1824	5	5	5	5	5	5	5	5	5	5	5	5	5	5	5	5	5	5	5	5	5	5	5	5	5	5	5	5	5	4	5	5	5	5	5	5	4.66667
1825	5	5	5	5	5	5	5	5	5	5	5	5	5	5	5	5	4	5	5	5	5	5	5	5	5	5	5	5	5	3	5	5	4.8	5	5	5	4.33333
1826	5	5	5	5	5	5	5	5	5	5	5	5	5	5	5	5	4	5	5	5	5	5	1	1	5	5	5	5	5	3	5	5	4.8	3	5	5	4.33333
1827	5	5	5	5	5	5	5	5	5	5	5	5	5	4	5	5	2	5	5	5	5	5	2	4	5	5	5	5	5	4	5	5	4.4	4	4.66667	5	4.66667
1828	5	5	3	5	5	5	5	5	5	5	5	5	5	5	3	5	3	5	5	5	5	5	4	3	5	5	5	3	5	4	4.66667	5	4.6	4.25	4.33333	5	4
1829	5	5	5	5	5	5	4	4	4	4	4	5	5	5	4	5	4	5	5	5	5	5	4	4	5	5	5	2	5	4	5	4.16667	4.8	4.5	4.66667	5	3.66667
1830	5	5	5	5	5	5	5	5	5	5	4	5	5	5	5	5	4	5	5	5	5	5	4	4	5	5	5	5	5	5	5	4.83333	4.8	4.5	5	5	5
1831	5	5	5	5	5	5	4	4	4	4	4	5	5	5	4	5	4	5	5	4	5	5	2	2	5	5	5	4	5	2	5	4.16667	4.6	3.5	4.66667	5	3.66667
1832	5	5	5	5	5	5	2	4	4	3	4	5	5	5	3	5	4	5	5	4	5	5	3	3	5	5	5	4	5	4	5	3.66667	4.6	4	4.33333	5	4.33333
1833	5	5	5	5	5	5	5	4	4	4	4	5	5	5	5	5	5	5	5	5	5	5	5	4	5	5	5	3	5	4	5	4.33333	5	4.75	5	5	4
1834	5	5	5	5	5	5	5	5	5	4	4	5	5	5	4	5	2	5	5	4	5	5	4	1	5	5	5	4	5	4	5	4.66667	4.2	3.75	4.66667	5	4.33333
1835	5	5	5	5	5	5	5	5	5	5	4	5	5	5	5	5	4	5	5	4	5	5	1	1	5	5	5	3	5	4	5	4.83333	4.6	3	5	5	4
1836	5	5	5	5	5	5	5	5	5	3	3	5	5	5	5	5	5	5	5	5	5	5	2	3	5	5	5	3	5	3	5	4.33333	5	3.75	5	5	3.66667
1837	5	5	5	5	5	5	5	5	5	5	4	5	5	5	4	5	4	5	5	4	5	5	4	4	5	5	5	1	5	4	5	4.83333	4.6	4.5	4.66667	5	3.33333
1838	5	5	5	5	5	4	5	5	5	4	5	5	5	5	5	5	5	5	5	5	5	5	5	4	5	5	5	4	5	4	4.83333	4.83333	5	4.75	5	5	4.33333
1839	5	4	4	5	4	3	5	5	5	3	5	5	5	5	3	5	3	5	5	3	5	5	2	2	5	5	5	4	5	3	4.16667	4.66667	4.2	3.5	4.33333	5	4
1840	5	5	4	5	5	4	5	5	5	4	5	5	5	5	5	5	3	5	5	4	4	5	3	1	5	5	5	5	5	5	4.66667	4.83333	4.4	3.25	5	5	5
1841	5	2	4	5	5	5	5	5	5	5	5	5	5	5	5	5	5	5	5	5	5	4	1	1	5	5	5	3	5	4	4.33333	5	5	2.75	5	5	4
1842	5	2	2	5	4	4	5	5	5	4	4	5	5	5	5	5	5	5	5	4	5	5	2	1	5	5	5	3	5	2	3.66667	4.66667	4.8	3.25	5	5	3.33333
1843	5	5	5	5	5	5	5	5	5	4	4	5	5	5	5	5	2	5	5	2	5	5	1	1	5	5	5	4	5	2	5	4.66667	3.8	3	5	5	3.66667
1844	5	5	5	5	5	5	5	5	5	5	4	4	5	5	5	5	2	5	5	3	5	5	2	2	5	5	5	2	5	2	5	4.66667	4	3.5	5	5	3
1845	5	5	5	5	5	5	5	5	5	2	1	4	5	5	5	5	4	5	5	4	5	5	4	4	5	5	5	5	5	4	5	3.66667	4.6	4.5	5	5	4.66667
1846	5	5	5	5	5	5	5	5	5	4	5	4	5	5	5	5	5	5	5	4	5	5	2	2	5	5	5	2	5	2	5	4.66667	4.8	3.5	5	5	3
1847	5	5	5	5	5	5	5	5	5	4	3	5	5	5	5	5	5	5	5	3	5	5	4	3	5	5	5	4	5	4	5	4.5	4.6	4.25	5	5	4.33333
1848	5	5	5	5	5	5	4	5	5	2	4	4	5	5	5	5	2	5	5	1	5	5	1	1	5	5	5	4	5	4	5	4	3.6	3	5	5	4.33333
1849	5	5	5	5	5	5	1	5	5	1	1	1	5	5	5	5	5	5	5	5	5	5	5	4	5	5	5	3	5	2	5	2.33333	5	4.75	5	5	3.33333
1850	5	5	5	5	5	5	3	5	5	4	5	4	5	5	5	5	4	5	5	4	5	5	2	1	5	5	5	3	5	4	5	4.33333	4.6	3.25	5	5	4
1851	5	5	5	5	5	5	5	5	5	5	5	5	5	5	5	5	1	5	5	5	5	5	1	1	5	5	5	1	5	3	5	5	4.2	3	5	5	3
1852	5	5	5	5	5	5	5	5	5	5	5	5	5	5	5	5	4	5	5	3	5	5	3	3	5	5	5	1	5	3	5	5	4.4	4	5	5	3
1853	5	5	5	5	5	5	5	5	5	5	5	5	5	5	5	5	4	3	5	3	5	5	1	2	5	5	5	4	5	4	5	5	4	3.25	5	5	4.33333
1854	5	5	5	5	5	5	5	5	5	5	5	5	4	5	5	2	2	2	5	2	5	5	2	2	5	5	5	4	5	4	5	5	2.6	3.5	4.66667	5	4.33333
1855	5	5	5	5	5	5	5	5	5	5	5	5	5	5	5	5	5	4	5	5	5	5	1	4	5	5	5	5	5	3	5	5	4.8	3.75	5	5	4.33333
1856	5	5	5	5	5	5	5	5	5	5	5	5	2	2	1	4	4	4	5	4	5	5	4	2	5	5	5	4	5	4	5	5	4.2	4	1.66667	5	4.33333
1857	5	5	5	5	5	5	5	5	5	5	5	5	4	2	2	2	2	2	5	2	5	5	2	2	5	5	5	1	5	2	5	5	2.6	3.5	2.66667	5	2.66667
1858	5	5	5	5	5	5	5	5	5	5	5	5	5	5	5	2	2	2	5	3	5	5	5	5	5	5	5	5	5	5	5	5	2.8	5	5	5	5
1859	5	5	5	5	5	5	5	5	5	5	5	5	4	5	3	4	5	4	5	5	5	5	3	5	5	5	5	4	5	5	5	5	4.6	4.5	4	5	4.66667
1860	5	4	3	5	3	3	5	5	5	5	5	5	3	2	3	2	3	3	5	2	5	5	3	4	5	5	5	3	5	5	3.83333	5	3	4.25	2.66667	5	4.33333
1861	5	5	3	5	5	4	5	5	5	5	5	5	5	5	5	4	5	4	5	4	5	5	5	5	5	5	5	2	5	5	4.5	5	4.4	5	5	5	4
1862	5	4	3	5	5	5	5	5	5	5	5	5	2	2	3	3	4	4	5	3	5	5	4	1	5	5	5	1	5	5	4.5	5	3.8	3.75	2.33333	5	3.66667
1863	5	4	4	5	4	4	5	5	5	5	5	5	3	2	2	4	4	4	5	4	5	5	4	4	5	5	5	2	5	5	4.33333	5	4.2	4.5	2.33333	5	4
1864	5	3	2	5	5	4	5	5	5	5	5	5	4	5	3	4	5	3	5	3	5	5	2	3	5	5	5	3	5	5	4	5	4	3.75	4	5	4.33333
1865	5	5	5	5	5	5	5	5	5	5	5	5	4	4	4	4	4	4	5	4	5	5	5	5	5	5	5	4	5	5	5	5	4.2	5	4	5	4.66667
1866	5	5	5	5	5	5	5	5	5	5	5	5	4	4	4	4	4	4	5	5	5	5	5	5	5	5	5	3	5	5	5	5	4.4	5	4	5	4.33333
1867	5	5	5	5	5	5	5	5	5	5	5	5	4	4	4	3	4	4	5	5	4	4	5	5	5	5	5	4	5	5	5	5	4.2	4.5	4	5	4.66667
1868	5	5	5	5	5	5	5	5	5	5	5	5	4	4	4	4	4	4	5	5	5	5	5	5	5	5	5	3	5	5	5	5	4.4	5	4	5	4.33333
1869	5	5	5	5	5	5	5	5	5	5	5	5	4	4	4	4	4	3	5	5	5	4	4	5	5	5	5	4	5	5	5	5	4.2	4.5	4	5	4.66667
1870	5	5	5	5	5	5	5	5	5	5	5	5	5	5	5	5	5	5	5	4	5	5	5	5	5	5	5	5	5	5	5	5	4.8	5	5	5	5
1871	5	5	5	5	5	5	5	5	5	5	5	5	4	4	4	4	4	4	5	5	5	5	5	5	5	5	5	5	5	5	5	5	4.4	5	4	5	5
1872	5	5	5	5	5	5	5	5	5	5	5	5	4	4	4	4	4	4	5	5	5	5	5	5	5	5	5	5	5	5	5	5	4.4	5	4	5	5
1873	5	5	5	3	5	3	5	5	5	5	5	5	5	4	5	3	5	5	5	5	5	5	5	5	5	5	5	5	5	5	4.33333	5	4.6	5	4.66667	5	5
1874	2	5	5	5	5	5	5	5	2	5	5	5	4	4	5	4	5	5	5	5	5	4	4	5	5	3	4	5	5	5	4.5	4.5	4.8	4.5	4.33333	4	5
1875	5	5	4	5	3	5	5	3	5	5	5	5	3	5	5	4	5	5	5	5	4	5	5	5	5	5	4	5	5	5	4.5	4.66667	4.8	4.75	4.33333	4.66667	5
1876	5	3	5	5	3	5	4	5	5	5	5	5	5	5	4	4	5	5	5	5	5	5	5	5	5	4	5	5	5	5	4.33333	4.83333	4.8	5	4.66667	4.66667	5
1877	3	5	5	5	5	5	5	5	5	5	5	5	5	5	5	5	5	3	5	5	5	4	5	5	5	5	5	5	5	5	4.66667	5	4.6	4.75	5	5	5
1878	5	2	2	5	3	2	5	5	5	5	5	4	5	5	4	3	5	5	5	5	5	5	5	5	5	5	5	5	5	5	3.16667	4.83333	4.6	5	4.66667	5	5
1879	5	5	5	5	3	5	5	5	5	5	5	4	5	5	5	5	5	5	5	5	5	5	5	5	5	5	5	5	5	5	4.66667	4.83333	5	5	5	5	5
1880	5	5	5	5	5	5	5	5	5	5	5	4	3	5	5	5	5	5	5	5	5	5	5	5	5	5	5	5	4	5	5	4.83333	5	5	4.33333	5	4.66667
1881	5	5	5	5	3	5	5	5	5	5	5	4	5	5	5	5	5	5	5	5	4	5	5	5	5	5	5	5	4	5	4.66667	4.83333	5	4.75	5	5	4.66667
1882	5	5	5	4	3	5	5	5	5	5	5	4	5	4	5	5	4	5	5	5	5	5	5	5	5	5	5	5	4	5	4.5	4.83333	4.8	5	4.66667	5	4.66667
1883	5	5	5	5	4	5	4	5	5	5	5	5	5	5	5	5	5	5	5	5	5	5	5	5	5	5	5	5	5	5	4.83333	4.83333	5	5	5	5	5
1884	2	5	5	5	5	5	5	5	5	4	4	4	5	5	4	5	5	5	5	5	5	5	5	5	5	5	5	5	4	4	4.5	4.5	5	5	4.66667	5	4.33333
1885	5	5	5	5	5	5	5	5	5	5	5	4	5	4	5	5	5	5	5	5	5	5	5	5	5	5	5	5	5	4	5	4.83333	5	5	4.66667	5	4.66667
1886	5	4	4	5	4	5	5	5	5	5	5	4	5	5	5	5	5	5	5	5	5	5	5	5	5	5	5	5	4	5	4.5	4.83333	5	5	5	5	4.66667
1887	4	3	3	5	3	4	5	5	4	4	4	4	4	5	3	5	5	5	5	5	5	5	5	5	5	5	5	5	2	4	3.66667	4.33333	5	5	4	5	3.66667
1888	5	3	4	5	4	4	4	3	4	4	4	4	4	5	5	5	2	2	5	5	1	5	5	5	5	5	4	5	3	5	4.16667	3.83333	3.8	4	4.66667	4.66667	4.33333
1889	5	5	5	5	5	5	4	5	5	4	5	4	4	5	5	5	4	4	4	4	4	4	5	5	5	5	5	5	4	4	5	4.5	4.2	4.5	4.66667	5	4.33333
1890	5	5	5	5	5	5	4	5	5	4	5	4	4	5	5	4	4	4	4	4	4	4	5	5	5	5	5	5	4	4	5	4.5	4	4.5	4.66667	5	4.33333
1891	5	5	5	5	5	5	4	5	5	4	5	4	4	5	5	4	4	4	4	4	5	4	5	5	5	5	5	5	4	4	5	4.5	4	4.75	4.66667	5	4.33333
1892	5	5	5	5	5	5	4	5	5	4	5	4	4	5	5	5	4	5	4	4	5	4	5	5	5	5	5	5	5	5	5	4.5	4.4	4.75	4.66667	5	5
1893	5	5	5	5	5	5	4	5	5	4	5	4	5	5	5	5	5	5	4	4	5	5	5	5	5	5	5	5	5	5	5	4.5	4.6	5	5	5	5
1894	5	5	5	5	5	5	4	5	5	4	5	4	5	5	5	5	5	5	4	4	5	5	5	5	5	5	5	5	5	5	5	4.5	4.6	5	5	5	5
1895	5	5	5	5	5	5	4	5	5	4	5	4	5	5	5	5	5	5	4	4	5	5	5	5	5	5	5	5	5	5	5	4.5	4.6	5	5	5	5
1896	5	5	5	5	5	5	4	5	5	4	5	4	5	5	5	5	5	5	5	5	5	5	5	5	5	5	5	5	3	5	5	4.5	5	5	5	5	4.33333
1897	5	5	5	5	5	5	4	5	5	4	5	4	5	5	5	5	5	5	5	5	5	5	5	5	5	5	5	5	5	5	5	4.5	5	5	5	5	5
1898	5	5	5	3	5	5	4	5	5	4	5	4	5	5	5	5	5	5	5	5	5	5	5	5	5	5	5	5	5	5	4.66667	4.5	5	5	5	5	5
1899	5	5	5	5	5	5	4	5	5	4	5	5	5	5	5	5	5	5	5	5	5	5	5	5	5	5	5	5	5	5	5	4.66667	5	5	5	5	5
1900	4	3	3	5	4	4	5	5	5	5	5	4	5	5	5	5	5	5	5	5	5	5	5	5	5	5	5	5	5	5	3.83333	4.83333	5	5	5	5	5
1901	5	5	5	5	5	5	5	5	5	5	5	4	5	5	5	5	5	5	5	5	5	5	5	5	5	5	5	5	5	5	5	4.83333	5	5	5	5	5
1902	5	5	5	5	5	5	5	5	5	5	5	5	5	5	5	5	5	5	5	5	5	5	5	5	5	5	5	5	5	5	5	5	5	5	5	5	5
1903	5	5	5	5	5	5	5	5	5	5	5	4	5	5	5	5	5	5	5	5	5	5	5	5	5	5	5	5	5	5	5	4.83333	5	5	5	5	5
1904	5	5	5	5	5	5	5	5	5	5	5	4	5	5	5	5	5	5	5	5	5	5	5	5	5	5	5	5	5	5	5	4.83333	5	5	5	5	5
1905	5	5	5	5	5	5	5	5	5	5	5	4	5	5	5	5	5	5	5	5	5	5	5	5	5	5	5	5	5	5	5	4.83333	5	5	5	5	5
1906	3	3	4	2	5	4	5	5	5	5	5	4	5	5	5	4	5	5	5	5	5	5	5	5	5	5	5	5	5	5	3.5	4.83333	4.8	5	5	5	5
1907	5	5	5	5	5	5	5	5	5	5	5	4	5	5	5	4	5	5	5	5	5	5	5	5	5	5	4	5	5	5	5	4.83333	4.8	5	5	4.66667	5
1908	5	5	5	5	5	5	5	5	5	5	5	5	5	5	5	4	5	5	5	5	5	5	5	5	5	5	4	5	5	5	5	5	4.8	5	5	4.66667	5
1909	4	3	4	5	5	4	5	5	5	5	5	4	4	5	5	4	5	5	5	5	5	5	5	5	5	5	4	5	5	5	4.16667	4.83333	4.8	5	4.66667	4.66667	5
1910	5	5	5	5	5	4	5	5	5	5	5	4	4	5	5	4	5	5	5	5	5	5	5	5	5	5	5	5	5	5	4.83333	4.83333	4.8	5	4.66667	5	5
1911	4	4	4	5	5	4	5	5	5	5	5	5	4	5	5	4	5	5	5	5	5	5	5	5	5	5	4	5	5	5	4.33333	5	4.8	5	4.66667	4.66667	5
1912	5	5	5	5	5	5	5	5	5	5	5	5	5	5	5	4	5	5	5	5	5	5	5	5	5	5	4	5	5	5	5	5	4.8	5	5	4.66667	5
1913	4	3	3	5	5	5	5	5	5	5	5	5	5	5	5	5	5	5	5	5	5	5	5	5	5	5	5	5	5	5	4.16667	5	5	5	5	5	5
1914	5	5	5	5	5	5	5	5	5	5	5	5	5	5	5	5	5	5	5	5	5	5	5	5	5	5	5	5	5	5	5	5	5	5	5	5	5
1915	5	5	4	5	5	4	5	5	5	5	5	5	5	5	5	5	5	5	5	5	5	5	5	5	5	5	5	5	5	5	4.66667	5	5	5	5	5	5
1916	5	5	5	5	5	4	5	5	5	5	5	5	5	5	5	5	5	5	5	5	5	5	5	5	5	5	5	5	5	5	4.83333	5	5	5	5	5	5
1917	5	5	5	5	5	4	5	5	5	5	5	5	5	5	5	5	5	5	5	5	5	5	5	5	5	5	5	5	5	5	4.83333	5	5	5	5	5	5
1918	5	5	5	5	5	4	5	5	5	5	5	5	5	5	5	5	5	5	5	5	5	5	5	5	5	5	5	5	5	5	4.83333	5	5	5	5	5	5
1919	4	3	3	5	5	4	5	5	5	5	5	5	5	5	5	5	5	5	5	4	5	5	5	5	5	5	5	5	4	5	4	5	4.8	5	5	5	4.66667
1920	5	4	4	5	5	4	5	5	5	5	5	5	5	5	5	5	5	5	5	4	5	5	5	5	5	5	5	5	4	5	4.5	5	4.8	5	5	5	4.66667
1921	2	3	3	5	5	3	5	5	5	5	5	5	5	5	5	5	4	5	5	4	5	5	5	5	5	5	5	5	3	5	3.5	5	4.6	5	5	5	4.33333
1922	5	5	5	5	5	5	5	5	5	5	5	5	5	5	5	5	4	5	4	4	5	5	5	5	5	5	5	5	4	5	5	5	4.4	5	5	5	4.66667
1923	4	5	5	5	5	4	5	5	5	5	5	5	5	5	5	5	5	4	4	4	5	5	5	5	5	5	5	5	5	5	4.66667	5	4.4	5	5	5	5
1924	4	3	4+H37:H112	5	5	5	5	5	5	5	5	5	5	5	5	5	5	4	4	5	5	5	5	5	5	5	5	5	3	5	4.4	5	4.6	5	5	5	4.33333
1925	3	3	4	5	5	4	5	5	5	5	5	5	5	5	5	5	5	4	4	5	5	5	5	5	5	5	5	5	3	5	4	5	4.6	5	5	5	4.33333
1926	4	3	4	5	5	4	5	5	5	5	5	5	5	5	5	5	4	4	4	5	5	5	5	5	5	5	5	5	1	5	4.16667	5	4.4	5	5	5	3.66667
1927	4	4	4	5	5	5	5	5	5	5	5	5	5	4	5	5	4	4	5	5	5	5	5	5	5	5	5	5	4	5	4.5	5	4.6	5	4.66667	5	4.66667
1928	5	5	5	5	5	4	5	5	5	5	5	5	5	5	5	5	5	5	5	5	5	5	5	5	5	5	5	5	5	5	4.83333	5	5	5	5	5	5
1929	5	4	4	5	5	5	5	5	5	5	5	5	5	4	4	5	4	5	5	5	5	5	5	5	5	5	5	5	3	5	4.66667	5	4.8	5	4.33333	5	4.33333
1930	4	3	3	5	5	4	5	5	5	5	5	5	5	4	5	5	4	5	5	5	5	5	5	5	5	5	5	5	4	5	4	5	4.8	5	4.66667	5	4.66667
1931	5	5	5	5	5	5	5	5	5	5	5	5	5	4	4	5	4	5	5	5	5	5	5	5	5	5	5	5	4	5	5	5	4.8	5	4.33333	5	4.66667
1932	5	5	5	5	5	5	5	5	5	5	5	4	5	5	4	5	3	5	5	5	5	5	5	5	5	5	5	5	4	5	5	4.83333	4.6	5	4.66667	5	4.66667
1933	5	5	5	5	5	5	5	5	5	5	5	5	5	5	5	5	5	5	5	5	5	5	5	5	5	5	5	5	3	5	5	5	5	5	5	5	4.33333
1934	5	5	5	5	5	5	5	5	5	5	5	4	5	5	4	5	5	5	5	5	5	5	5	5	5	5	5	5	4	5	5	4.83333	5	5	4.66667	5	4.66667
1935	5	5	5	5	5	5	5	5	5	5	5	5	5	5	5	5	5	5	5	5	5	5	5	5	5	5	5	5	4	5	5	5	5	5	5	5	4.66667
1936	5	5	5	5	5	5	5	5	5	5	5	4	5	5	5	5	2	5	5	5	5	5	5	5	5	5	5	5	2	5	5	4.83333	4.4	5	5	5	4
1937	5	5	5	5	5	5	5	5	5	5	5	4	5	5	5	5	5	5	5	5	5	5	5	5	5	5	5	5	5	5	5	4.83333	5	5	5	5	5
1938	5	5	5	5	5	5	5	5	5	5	5	4	5	5	5	5	5	5	5	5	5	5	5	5	5	5	5	5	5	5	5	4.83333	5	5	5	5	5
1939	5	5	5	5	5	5	5	5	5	5	5	5	5	5	5	5	3	5	5	5	5	5	5	5	5	5	5	5	5	5	5	5	4.6	5	5	5	5
1940	5	5	5	5	5	5	5	5	5	5	5	5	5	5	5	5	4	5	5	5	5	5	5	5	5	5	5	5	5	5	5	5	4.8	5	5	5	5
1941	5	5	5	5	5	5	5	5	5	5	5	4	5	5	5	5	5	4	5	5	5	5	5	5	5	5	5	5	5	5	5	4.83333	4.8	5	5	5	5
1942	5	5	5	5	5	5	5	5	5	5	5	4	5	5	5	5	4	4	5	5	5	5	5	5	5	5	5	5	5	5	5	4.83333	4.6	5	5	5	5
1943	5	5	5	5	5	5	5	5	5	5	5	5	5	5	5	5	5	4	5	5	5	5	5	5	5	5	5	5	5	5	5	5	4.8	5	5	5	5
1944	5	5	5	5	5	5	3	4	5	5	5	2	5	5	5	5	4	3	5	5	5	5	5	5	5	5	5	5	5	5	5	4	4.4	5	5	5	5
1945	5	5	5	5	5	5	5	4	5	5	5	4	5	5	5	5	4	4	5	5	5	5	5	5	5	5	5	5	5	5	5	4.66667	4.6	5	5	5	5
1946	5	5	5	5	5	5	5	5	5	5	5	5	5	5	5	5	5	5	5	5	5	5	5	5	5	5	5	5	5	5	5	5	5	5	5	5	5
1947	4	4	3	5	5	4	4	4	5	5	5	4	5	5	5	5	4	2	5	5	5	5	5	5	5	5	5	5	5	5	4.16667	4.5	4.2	5	5	5	5
1948	5	5	5	5	5	5	5	4	5	5	5	5	5	5	5	5	4	4	5	5	5	5	5	5	5	5	5	5	5	5	5	4.83333	4.6	5	5	5	5
1949	4	4	4	5	5	5	4	5	5	5	5	5	5	5	5	5	5	2	5	5	5	5	5	5	5	5	5	5	5	5	4.5	4.83333	4.4	5	5	5	5
1950	5	5	5	5	5	5	5	5	5	5	5	5	5	5	5	5	4	4	5	5	5	5	5	5	5	5	5	5	5	5	5	5	4.6	5	5	5	5
1951	5	5	5	5	5	5	5	5	5	5	5	5	5	5	5	5	5	4	5	5	5	5	5	5	5	5	5	5	5	5	5	5	4.8	5	5	5	5
1952	5	5	4	5	5	5	5	5	5	5	5	5	5	5	5	5	5	5	5	5	5	5	5	5	5	5	5	5	5	5	4.83333	5	5	5	5	5	5
1953	5	5	5	5	5	5	5	4	4	4	5	5	5	5	5	5	4	4	5	5	5	5	5	5	5	5	5	5	5	5	5	4.5	4.6	5	5	5	5
1954	5	5	5	5	5	5	2	2	4	4	5	5	5	5	4	5	4	4	5	5	5	5	5	5	5	5	5	5	5	5	5	3.66667	4.6	5	4.66667	5	5
1955	5	5	5	5	5	5	5	5	5	5	5	5	5	5	1	5	4	4	5	5	5	5	5	5	2	5	5	5	5	5	5	5	4.6	5	3.66667	4	5
1956	5	5	5	5	5	5	5	5	5	5	5	5	5	5	5	5	2	2	5	5	5	5	5	5	4	5	5	5	5	5	5	5	3.8	5	5	4.66667	5
1957	5	5	5	5	5	5	5	5	5	5	5	5	5	5	5	5	4	5	5	5	5	5	5	5	3	5	5	5	5	5	5	5	4.8	5	5	4.33333	5
1958	5	5	5	5	5	5	5	5	5	5	5	5	5	5	5	5	5	5	5	5	5	5	5	5	4	5	5	5	5	5	5	5	5	5	5	4.66667	5
1959	5	5	5	5	5	5	5	5	5	5	5	5	5	5	5	5	5	5	5	5	3	5	5	5	1	5	5	5	5	5	5	5	5	4.5	5	3.66667	5
1960	5	5	5	5	5	5	5	5	5	5	5	5	5	5	5	5	5	5	5	5	3	5	5	5	3	5	5	5	5	5	5	5	5	4.5	5	4.33333	5
1961	5	5	5	5	5	5	5	5	5	5	5	5	5	5	5	5	5	5	5	5	5	5	5	5	5	5	5	5	5	5	5	5	5	5	5	5	5
1962	5	5	5	5	5	5	5	5	5	5	5	5	5	5	5	5	5	5	5	5	4	5	5	5	2	5	5	5	5	5	5	5	5	4.75	5	4	5
1963	5	5	5	5	5	5	5	5	5	5	5	5	5	5	5	5	5	5	5	5	2	5	5	5	4	5	5	5	5	5	5	5	5	4.25	5	4.66667	5
1964	5	5	5	5	5	5	5	5	5	5	5	5	5	5	5	5	5	5	5	5	5	5	5	5	4	5	5	5	2	5	5	5	5	5	5	4.66667	4
1965	5	5	5	5	5	5	5	5	5	5	5	5	5	5	5	5	5	5	5	5	5	5	5	5	4	5	5	5	4	5	5	5	5	5	5	4.66667	4.66667
1966	5	5	5	5	5	5	5	5	5	5	5	5	5	5	5	5	5	5	5	5	5	5	5	5	5	5	5	5	4	5	5	5	5	5	5	5	4.66667
1967	5	5	5	5	5	5	5	5	5	5	5	5	5	5	5	5	5	5	5	5	5	5	5	5	4	5	5	5	4	5	5	5	5	5	5	4.66667	4.66667
1968	5	5	5	5	5	5	5	5	5	5	5	5	5	5	5	5	5	5	5	5	5	5	5	5	5	5	5	5	2	5	5	5	5	5	5	5	4
1969	5	5	5	5	5	5	5	5	5	5	5	5	5	5	5	5	5	5	5	5	5	5	5	5	5	5	5	5	3	5	5	5	5	5	5	5	4.33333
1970	5	5	5	5	5	5	5	5	5	5	5	5	5	5	5	5	5	5	5	5	5	5	5	5	5	5	5	5	2	5	5	5	5	5	5	5	4
1971	5	5	5	5	5	5	3	5	5	4	5	5	5	5	5	5	5	5	5	5	5	5	5	5	5	5	5	5	5	5	5	4.5	5	5	5	5	5
1972	5	5	5	5	5	5	5	5	5	5	5	5	5	4	4	5	5	5	5	5	5	5	5	5	5	5	5	5	5	5	5	5	5	5	4.33333	5	5
1973	5	5	5	5	5	5	4	5	5	3	5	5	5	5	4	5	5	5	5	5	5	5	5	5	5	5	5	5	5	5	5	4.5	5	5	4.66667	5	5
1974	5	5	5	5	5	5	5	5	5	4	5	5	5	4	4	5	5	5	5	5	5	5	5	5	5	5	5	5	5	5	5	4.83333	5	5	4.33333	5	5
1975	5	4	5	5	5	4	4	5	5	4	5	5	5	5	4	5	5	5	5	5	5	5	5	5	5	5	5	5	5	5	4.66667	4.66667	5	5	4.66667	5	5
1976	4	4	3	5	5	4	4	5	5	4	5	5	5	5	4	5	5	5	5	5	5	5	5	5	5	5	5	5	5	5	4.16667	4.66667	5	5	4.66667	5	5
1977	1	2	5	5	5	3	2	5	5	2	5	5	5	5	5	5	5	5	5	5	5	5	5	5	5	5	5	5	5	5	3.5	4	5	5	5	5	5
1978	1	2	5	5	5	1	5	5	5	5	5	5	5	5	5	5	5	5	5	5	5	5	5	5	5	5	5	5	5	5	3.16667	5	5	5	5	5	5
1979	5	5	5	5	5	5	5	5	5	5	5	5	5	5	5	5	5	5	5	5	5	5	5	5	5	5	5	5	5	5	5	5	5	5	5	5	5
1980	4	5	5	5	5	4	5	5	5	5	5	5	5	5	5	5	5	5	5	5	5	5	5	5	5	5	5	5	5	5	4.66667	5	5	5	5	5	5
1981	4	4	5	5	5	5	5	5	5	5	5	5	5	5	5	5	5	5	5	5	5	5	5	5	5	5	5	5	5	5	4.66667	5	5	5	5	5	5
1982	1	2	5	5	5	4	5	5	5	5	5	5	5	5	5	5	5	5	5	5	5	5	5	5	5	5	5	5	5	5	3.66667	5	5	5	5	5	5
1983	4	4	5	5	5	3	5	5	5	5	5	5	5	5	5	5	5	5	5	5	5	5	5	5	5	5	5	5	5	5	4.33333	5	5	5	5	5	5
1984	1	2	5	5	5	2	5	5	5	5	5	5	5	5	5	5	5	5	5	5	5	5	5	5	5	5	5	5	5	5	3.33333	5	5	5	5	5	5
1985	1	1	5	5	5	1	5	5	5	5	5	5	5	5	5	5	5	5	5	5	5	5	5	5	5	5	5	5	5	5	3	5	5	5	5	5	5
1986	4	4	5	5	5	5	5	5	5	5	5	5	5	5	5	5	5	5	5	5	5	5	5	5	5	5	5	5	5	5	4.66667	5	5	5	5	5	5
1987	1	2	5	5	5	1	5	5	5	5	5	5	5	5	5	5	5	5	5	5	5	5	5	5	5	5	5	5	5	5	3.16667	5	5	5	5	5	5
1988	1	2	5	5	5	1	5	5	5	5	5	5	5	5	5	5	5	5	5	5	5	5	5	5	5	5	5	5	5	5	3.16667	5	5	5	5	5	5
1989	4	2	5	5	5	2	5	5	5	5	5	5	5	5	5	5	5	5	5	5	5	5	5	5	5	5	5	5	5	5	3.83333	5	5	5	5	5	5
1990	5	5	5	5	5	5	5	5	5	5	5	5	5	5	5	5	5	5	5	5	5	5	5	5	4	5	5	5	5	5	5	5	5	5	5	4.66667	5
1991	5	5	5	5	5	5	5	5	5	5	5	5	5	5	5	5	5	5	5	5	5	5	5	5	5	5	5	5	1	5	5	5	5	5	5	5	3.66667
1992	5	5	5	5	5	5	5	5	5	4	2	4	5	5	5	5	5	5	5	5	5	5	5	5	4	5	5	5	2	5	5	4.16667	5	5	5	4.66667	4
1993	5	5	5	5	5	5	5	5	5	4	5	5	5	5	5	5	5	5	5	5	5	5	5	5	5	5	5	5	3	5	5	4.83333	5	5	5	5	4.33333
1994	5	5	5	5	5	5	5	5	5	4	4	4	5	4	5	5	5	5	5	5	5	5	5	5	4	5	5	5	4	5	5	4.5	5	5	4.66667	4.66667	4.66667
1995	5	5	5	5	5	5	5	5	5	4	4	4	5	4	5	5	5	5	5	5	5	5	5	5	4	5	5	5	4	5	5	4.5	5	5	4.66667	4.66667	4.66667
1996	5	5	5	5	5	5	5	5	5	4	4	4	4	4	5	5	5	5	5	5	5	5	5	5	4	5	5	5	4	5	5	4.5	5	5	4.33333	4.66667	4.66667
1997	5	5	5	5	5	5	5	5	5	4	4	5	4	4	5	5	5	5	5	5	5	5	5	5	4	5	4	5	4	5	5	4.66667	5	5	4.33333	4.33333	4.66667
1998	5	5	5	5	5	5	5	5	5	4	4	5	4	4	5	5	5	5	5	5	5	5	5	5	4	5	4	5	4	5	5	4.66667	5	5	4.33333	4.33333	4.66667
1999	5	5	5	5	5	5	5	5	5	4	4	5	4	4	5	5	5	5	5	5	5	5	5	5	4	5	4	5	5	5	5	4.66667	5	5	4.33333	4.33333	5
[truncated: 1,673 more rows]
