# Supplementary material for: Enhancing the e-learning system based on a novel tasks’ classification load-balancing algorithm
Source: PeerJ journal article supplement (doi:10.7717/peerj-cs.669), 2021-09-09
Supplement: VPS_Dedicated_Cloud_Server_Specification.pdf [file VPS_Dedicated_Cloud_Server_Specification.pdf]

Performance has been measured by the windows performance monitor

## **VPS Dedicated Cloud Server (Mocha Host)**

- [Dedicated Cloud](#)
- **14 GB - 24 GB RAM** Guaranteed
  - **6 GB RAM** Dynamic
    - **10 CPU** Cores
  - **24 GHz Total** CPU Power
  - **500 GB** SSD Disk Space
- **Unlimited Free SSL for Life (256 bit)** <sup>Ⓢ</sup>
  - VPN Support
  - Forex Optimized
    - Free CDN <sup>Ⓢ</sup>
  - CloudFlare Railgun <sup>∇</sup>
  - Unmetered Monthly Traffic
  - **1,000 mbps** Network Port
    - [Uptime Guarantee](#)
    - [LifeTime Discount](#)<sup>Ⓢ</sup>
    - [180 Days Risk Free](#)
    - GDPR compliant
- [\\_SpamExperts\\_ - EGP47.00/mo](#)
  - - Crystal Reports Support
      - Webmail: [Horde](#)
    - Tomcat/Java Support
      - MS SQL Express
        - MS SQL
      - Oracle XE Support
        - MySQL Support
  - Automatic Backups (Snapshots)
  - [SolidCP Control Panel \(Free\)](#)

- from EGP157.20/month \*
  - **Free Migration Assistance** <sup>α</sup>
    - [Let's Encrypt Support](#) <sup>δ</sup>
    - [1 LifeTime FREE Domain](#) \*
  - **Super Memory Cache**
-
